# Supplementary material for: Experimental triaxial testing of swelling gouge materials
Source: Springer Nature journal article supplement (doi:10.1007/s10064-019-01547-6), 2019-05-27
Supplement: MOESM1 [file 16754070]

## Sheet: Info
	This spreadsheet is Online Resource 1 for the article
	"Experimental triaxial testing of swelling gouge material"
	published in Rock Mechanics and Rock Engineering
	Authors:
	Are Håvard Høien, are.hoien@vegvesen.no
	Bjørn Nilsen
	Gunnar Vistnes
	Roger Olsson
	Info
	The spreadsheet contains E-modulus plots, shear stress development, background on strength properties and stress/strain-time graphs for all triaxial tests discussed in the article.
	All graphs are linked to the raw data except for the strength properties calculated in RocData.
	The data can be accessed by selecting the different tabs at the bottom om the spreadsheet.

## Sheet: E-modulus
	Prestress a						Prestress b
1-6									1-5
2-8									3-8
3-6									4-8
4-5									4-9
									Phase 1 pre-stress b
									Phase 2 pre-stress a

## Sheet: Str prop
		Data selected for curve fitting in RocData is marked with green cells
		Figures from RocData is right of the data on this sheet
		Data not used is red in the figures
H-B	Sigci		1.059			0.955			0.259			0.943			1.079			0.645			0.357			0.807
	mi		6.085			5.878			32.427			6.867			5.663			11.933			13.971			7.53
	resid		0.007			0.009			0.01			0.009			0.01			0.01			0.009			0.007
MC	cohe		0.335			0.318			0.192			0.302			0.342			0.229			0.227			0.293
	fric ang		29.71			28.242			35.969			30.577			29.004			34.43			27.5			29.048
	resid		0.001			0.002			0.002			0.002			0.002			0.002			0.001			0.001			Sample	Hoek-Brown											Mohr-Coulomb
		1-6			2-8			3-6			4-5			1-5			3-8			4-8			4-9				1-6
		Sd	Sc	Sa	Sd	Sc	Sa	Sd	Sc	Sa	Sd	Sc	Sa	Sd	Sc	Sa	Sd	Sc	Sa	Sd	Sc	Sa	Sd	Sc	Sa
	1	2	2	4	1.989	2	3.989	2	1.99	3.99	1.99	2	3.99	2.02	1.99	4.01	2	1.99	3.99	1.99	2	3.99	1.99	2	3.99
	2	1.99	2	3.99	1.989	2	3.989	2	2	4	1.99	1.99	3.98	2.02	2	4.02	1.98	1.99	3.97	2.02	2	4.02	2.01	1.99	4
	3	1.99	2	3.99	2.004	2	4.004	1.98	2	3.98	2.03	2	4.03	2.02	1.96	3.98	2	2	4	2	1.99	3.99	2.01	2	4.01
	4	1.99	1.96	3.95	2.004	1.99	3.994	2.01	1.99	4	2	1.99	3.99	2.05	1.88	3.93	2.01	2	4.01	2.02	2	4.02	2.02	1.97	3.99
	5	2.06	1.88	3.94	2.019	1.95	3.969	1.98	2	3.98	2.02	1.97	3.99	2	1.79	3.79	2	2	4	2	1.99	3.99	2.01	1.89	3.9
	6	2	1.8	3.8	2.004	1.86	3.864	2	1.97	3.97	2	1.89	3.89	2.01	1.69	3.7	2.01	1.97	3.98	2.02	1.96	3.98	1.99	1.8	3.79
	7	2.02	1.7	3.72	2.018	1.74	3.758	2.02	1.89	3.91	1.98	1.8	3.78	2.01	1.6	3.61	2	1.89	3.89	1.99	1.89	3.88	2.02	1.7	3.72
	8	2.01	1.6	3.61	2.033	1.61	3.643	2.02	1.8	3.82	1.99	1.7	3.69	2.02	1.49	3.51	2.01	1.8	3.81	2	1.79	3.79	2	1.6	3.6
	9	2	1.5	3.5	2.017	1.47	3.487	2	1.71	3.71	2.01	1.6	3.61	2.02	1.38	3.4	2.01	1.7	3.71	2	1.69	3.69	2.03	1.49	3.52
	10	2	1.4	3.4	2.016	1.33	3.346	2	1.61	3.61	1.99	1.5	3.49	2.01	1.28	3.29	2	1.59	3.59	2.01	1.6	3.61	1.99	1.39	3.38
	11	2	1.3	3.3	1.985	1.2	3.185	2.01	1.5	3.51	1.98	1.39	3.37	1.99	1.18	3.17	1.98	1.49	3.47	2	1.49	3.49	2	1.29	3.29
	12	1.99	1.19	3.18	1.984	1.06	3.044	1.96	1.4	3.36	1.98	1.29	3.27	1.99	1.08	3.07	2.01	1.39	3.4	1.99	1.39	3.38	1.98	1.18	3.16
	13	1.99	1.09	3.08	1.938	0.93	2.868	1.98	1.3	3.28	1.99	1.18	3.17	2.02	0.98	3	1.98	1.28	3.26	1.95	1.29	3.24	1.98	1.08	3.06
	14	1.94	0.99	2.93	1.951	0.81	2.761	1.96	1.2	3.16	1.97	1.09	3.06	1.94	0.98	2.92	1.99	1.18	3.17	1.98	1.18	3.16	1.96	0.99	2.95
	15	1.97	0.89	2.86	1.921	0.81	2.731	1.98	1.11	3.09	1.99	0.98	2.97	2	0.91	2.91	1.94	1.09	3.03	1.96	1.1	3.06	1.96	0.98	2.94
	16	1.95	0.81	2.76	1.89	0.73	2.62	1.95	1.01	2.96	1.97	0.91	2.88	1.94	0.88	2.82	1.95	0.99	2.94	1.97	1.08	3.05	1.96	0.92	2.88		2-8
	17	1.96	0.79	2.75	1.874	0.67	2.544	1.96	1	2.96	1.98	0.88	2.86	1.92	0.83	2.75	1.95	0.98	2.93	1.97	1.02	2.99	1.94	0.88	2.82
	18	1.93	0.74	2.67	1.858	0.62	2.478	1.92	0.94	2.86	1.92	0.83	2.75	1.95	0.78	2.73	1.95	0.92	2.87	1.92	0.98	2.9	1.94	0.84	2.78
	19	1.91	0.69	2.6	1.842	0.58	2.422	1.93	0.91	2.84	1.95	0.79	2.74	1.93	0.78	2.71	1.95	0.88	2.83	1.91	0.94	2.85	1.92	0.81	2.73
	20	1.91	0.66	2.57	1.826	0.55	2.376	1.93	0.87	2.8	1.93	0.76	2.69	1.91	0.74	2.65	1.94	0.84	2.78	1.91	0.91	2.82	1.91	0.78	2.69
	21	1.91	0.62	2.53	1.795	0.52	2.315	1.91	0.84	2.75	1.91	0.72	2.63	1.93	0.71	2.64	1.94	0.8	2.74	1.92	0.89	2.81	1.92	0.75	2.67
	22	1.89	0.61	2.5	1.809	0.5	2.309	1.93	0.82	2.75	1.91	0.7	2.61	1.9	0.68	2.58	1.91	0.79	2.7	1.9	0.86	2.76	1.92	0.72	2.64
	23	1.91	0.57	2.48	1.779	0.46	2.239	1.91	0.79	2.7	1.91	0.68	2.59	1.91	0.66	2.57	1.91	0.76	2.67	1.9	0.83	2.73	1.89	0.7	2.59
	24	1.91	0.55	2.46	1.733	0.44	2.173	1.89	0.77	2.66	1.91	0.66	2.57	1.91	0.63	2.54	1.89	0.73	2.62	1.9	0.81	2.71	1.9	0.69	2.59
	25	1.87	0.53	2.4	1.778	0.44	2.218	1.87	0.74	2.61	1.89	0.63	2.52	1.89	0.61	2.5	1.89	0.7	2.59	1.88	0.79	2.67	1.88	0.66	2.54
	26	1.86	0.52	2.38	1.732	0.42	2.152	1.87	0.73	2.6	1.88	0.62	2.5	1.86	0.59	2.45	1.91	0.69	2.6	1.88	0.77	2.65	1.88	0.64	2.52
	27	1.89	0.5	2.39	1.761	0.39	2.151	1.86	0.7	2.56	1.89	0.6	2.49	1.89	0.57	2.46	1.86	0.67	2.53	1.87	0.75	2.62	1.91	0.62	2.53
	28	1.89	0.47	2.36	1.715	0.39	2.105	1.86	0.69	2.55	1.86	0.58	2.44	1.86	0.56	2.42	1.84	0.65	2.49	1.88	0.74	2.62	1.9	0.61	2.51
	29	1.87	0.45	2.32	1.7	0.37	2.07	1.89	0.68	2.57	1.86	0.57	2.43	1.87	0.53	2.4	1.84	0.63	2.47	1.87	0.72	2.59	1.86	0.6	2.46
	30	1.84	0.44	2.28	1.699	0.35	2.049	1.87	0.66	2.53	1.86	0.55	2.41	1.84	0.52	2.36	1.84	0.62	2.46	1.86	0.71	2.57	1.86	0.58	2.44
	31	1.84	0.43	2.27	1.683	0.34	2.023	1.87	0.64	2.51	1.84	0.53	2.37	1.84	0.5	2.34	1.88	0.61	2.49	1.83	0.71	2.54	1.85	0.56	2.41
	32	1.82	0.41	2.23	1.683	0.34	2.023	1.84	0.63	2.47	1.87	0.53	2.4	1.84	0.5	2.34	1.85	0.59	2.44	1.86	0.69	2.55	1.86	0.55	2.41		3-6
	33	1.84	0.4	2.24	1.682	0.32	2.002	1.85	0.61	2.46	1.86	0.51	2.37	1.85	0.48	2.33	1.84	0.57	2.41	1.82	0.68	2.5	1.88	0.53	2.41
	34	1.8	0.39	2.19	1.652	0.31	1.962	1.84	0.6	2.44	1.84	0.5	2.34	1.84	0.47	2.31	1.85	0.56	2.41	1.82	0.66	2.48	1.8	0.52	2.32
	35	1.83	0.37	2.2	1.621	0.3	1.921	1.82	0.59	2.41	1.81	0.49	2.3	1.82	0.45	2.27	1.83	0.55	2.38	1.83	0.64	2.47	1.8	0.51	2.31
	36	1.8	0.37	2.17	1.621	0.3	1.921	1.85	0.58	2.43	1.84	0.48	2.32	1.82	0.44	2.26	1.85	0.53	2.38	1.81	0.64	2.45	1.83	0.51	2.34
	37	1.82	0.35	2.17	1.5	0.24	1.74	1.8	0.56	2.36	1.81	0.47	2.28	1.83	0.44	2.27	1.83	0.52	2.35	1.81	0.62	2.43	1.83	0.49	2.32
	38	1.82	0.34	2.16	1.38	0.19	1.57	1.8	0.56	2.36	1.81	0.45	2.26	1.82	0.42	2.24	1.82	0.51	2.33	1.78	0.62	2.4	1.84	0.49	2.33
	39	1.81	0.34	2.15	1.319	0.15	1.469	1.79	0.56	2.35	1.82	0.45	2.27	1.8	0.41	2.21	1.81	0.5	2.31	1.78	0.61	2.39	1.78	0.47	2.25
	40	1.78	0.33	2.11	1.334	0.15	1.484	1.83	0.54	2.37	1.79	0.44	2.23	1.8	0.4	2.2	1.81	0.49	2.3	1.81	0.61	2.42	1.78	0.46	2.24
	41	1.78	0.32	2.1				1.78	0.54	2.32	1.79	0.44	2.23	1.8	0.39	2.19	1.8	0.47	2.27	1.77	0.6	2.37	1.76	0.45	2.21
	42	1.8	0.31	2.11				1.8	0.52	2.32	1.8	0.43	2.23	1.8	0.38	2.18	1.77	0.46	2.23	1.8	0.59	2.39	1.81	0.44	2.25
	43	1.78	0.31	2.09				1.78	0.51	2.29	1.79	0.42	2.21	1.77	0.38	2.15	1.78	0.45	2.23	1.64	0.51	2.15	1.79	0.43	2.22
	44	1.78	0.3	2.08				1.8	0.51	2.31	1.79	0.41	2.2	1.81	0.36	2.17	1.78	0.44	2.22	1.51	0.45	1.96	1.78	0.43	2.21
	45	1.6	0.24	1.84				1.78	0.5	2.28	1.77	0.4	2.17	1.75	0.36	2.11	1.79	0.44	2.23	1.44	0.41	1.85	1.77	0.42	2.19
	46	1.55	0.19	1.74				1.78	0.49	2.27	1.76	0.4	2.16	1.75	0.34	2.09	1.78	0.44	2.22	1.44	0.4	1.84	1.79	0.41	2.2
	47	1.44	0.15	1.59				1.76	0.49	2.25	1.77	0.39	2.16	1.75	0.34	2.09	1.78	0.43	2.21				1.76	0.4	2.16
	48	1.44	0.15	1.59				1.78	0.48	2.26	1.74	0.38	2.12	1.76	0.33	2.09	1.75	0.41	2.16				1.79	0.39	2.18
	49							1.76	0.47	2.23	1.78	0.37	2.15	1.73	0.33	2.06	1.76	0.41	2.17				1.57	0.3	1.87
	50							1.75	0.46	2.21	1.78	0.37	2.15	1.75	0.32	2.07	1.76	0.4	2.16				1.46	0.24	1.7
	51							1.75	0.45	2.2	1.72	0.36	2.08	1.79	0.31	2.1	1.73	0.39	2.12				1.35	0.2	1.55		4-5
	52							1.74	0.45	2.19	1.74	0.36	2.1	1.75	0.31	2.06	1.73	0.38	2.11				1.37	0.2	1.57
	53							1.76	0.44	2.2	1.75	0.36	2.11	1.76	0.31	2.07	1.73	0.37	2.1
	54							1.73	0.43	2.16	1.74	0.35	2.09	1.74	0.3	2.04	1.73	0.37	2.1
	55							1.73	0.43	2.16	1.74	0.34	2.08	1.6	0.21	1.81	1.71	0.37	2.08
	56							1.71	0.42	2.13	1.73	0.33	2.06	1.46	0.16	1.62	1.72	0.36	2.08
	57							1.71	0.42	2.13	1.73	0.33	2.06	1.38	0.13	1.51	1.71	0.36	2.07
	58							1.71	0.42	2.13	1.73	0.33	2.06	1.4	0.13	1.53	1.71	0.35	2.06
	59							1.71	0.42	2.13	1.7	0.32	2.02				1.69	0.35	2.04
	60							1.72	0.41	2.13	1.72	0.32	2.04				1.69	0.34	2.03
	61							1.72	0.4	2.12	1.7	0.31	2.01				1.7	0.34	2.04
	62							1.69	0.4	2.09	1.69	0.31	2				1.72	0.33	2.05
	63							1.69	0.39	2.08	1.73	0.31	2.04				1.69	0.32	2.01
	64							1.71	0.39	2.1	1.73	0.3	2.03				1.66	0.32	1.98
	65							1.69	0.39	2.08	1.71	0.3	2.01				1.67	0.32	1.99
	66							1.72	0.38	2.1	1.56	0.24	1.8				1.67	0.31	1.98
	67							1.69	0.37	2.06	1.44	0.19	1.63				1.67	0.31	1.98
	68							1.72	0.37	2.09	1.38	0.15	1.53				1.68	0.31	1.99								1-5
	69							1.69	0.37	2.06	1.37	0.16	1.53				1.65	0.31	1.96
	70							1.67	0.37	2.04							1.68	0.31	1.99
	71							1.64	0.37	2.01							1.68	0.31	1.99
	72							1.66	0.36	2.02							1.7	0.3	2
	73							1.68	0.36	2.04							1.46	0.23	1.69
	74							1.64	0.36	2							1.34	0.18	1.52
	75							1.64	0.35	1.99							1.23	0.15	1.38
	76							1.65	0.35	2							1.28	0.15	1.43
	77							1.62	0.35	1.97
	78							1.64	0.34	1.98
	79							1.67	0.34	2.01
	80							1.65	0.34	1.99
	81							1.68	0.33	2.01
	82							1.63	0.33	1.96
	83							1.66	0.33	1.99
	84							1.65	0.33	1.98																	3-8
	85							1.65	0.33	1.98
	86							1.66	0.33	1.99
	87							1.65	0.32	1.97
	88							1.65	0.32	1.97
	89							1.65	0.32	1.97
	90							1.67	0.32	1.99
	91							1.63	0.32	1.95
	92							1.66	0.31	1.97
	93							1.64	0.31	1.95
	94							1.64	0.31	1.95
	95							1.63	0.31	1.94
	96							1.6	0.31	1.91
	97							1.64	0.31	1.95
	98							1.63	0.31	1.94
	99							1.62	0.31	1.93
	100							1.61	0.31	1.92
	101							1.64	0.3	1.94
	102							1.49	0.25	1.74
	103							1.35	0.22	1.57																	4-8
	104							1.28	0.19	1.47
	105							1.31	0.19	1.5
																											4-9

## Sheet: Shear stress development
	Vertical axis is max shear stress which is radius of Mohr circle, (σ1-σ3)/2 or Sd/2
	Horizontal axis is center of Mohr circle (σ3+σ1)/2 or (σc+σd)/2
	The lines then represents the top of the Mohr circle at a given time.
	2-8								4-9
																	(Sc+Sa)/2	Sd/2
	4-5								1-5
	1-6								3-8
	3-6								4-8

## Sheet: 1-6
Software:		GCTS C.A.T.S. Advanced	Version:	1.97
Project:		16041 - Are Høien
Sample:		Triax
Test:		Triaxial
Specimen:		2017-06-01
Number:		8
Description:		Larvik
Container ID:		_
Type:		Rock	Hard
Height of Platen(s):		0	(mm)
Double Membrane Thickness:		0	(mm)
Mass of Initial Moist Apparatus:		0	(gr)
Mass of Final Moist Apparatus:		0	(gr)
Mass of Final Dry Apparatus:		0	(gr)
Starting Date:		01/30/17
Starting Time:		13:06:15
Controller ID:		2647 RTR-4000
Triaxial Inputs
		1	Axial Load	Max:	1112	(kN)	Min:	-1112	(kN)
		Gain:	11.4258	=>	468	Counts
		Offset:	0.0463867	(Volts)	=>	2067	Counts
		GCTS Board #:	1952
		Digital Filter:
		Running Average:	200	(Hz)
		Warning Interlock:	NS
		Abort Interlock:	NS
		Software Offset:	4	(kN)
		Sensor ID:	1000kN Load Cell
			Sensor Type:	SG
			Model #:	2073-250K-0302
			Serial #:	112940A
			Parameter:	Force/Load
			Range	(kN):	Max:	1112	Min:	-1112
			Calibration:	Date:	07/16/13
			Type:	Linear - One point
			Full Scale Output:	3.1847	(mV/Volt)
			Offset:	0	(mV/Volt)
			Negative Output Correction Factor:	NS
			Equation: Output ((kN)) =	349.169	*(mV/Volt)	+	0
		2	Axial Displacement	Max:	50.8	(mm)	Min:	-50.8	(mm)
		Gain:	1.41602	=>	58	Counts
		Offset:	0.00244141	(Volts)	=>	2049	Counts
		DC Excitation:	Full (± 5 VDC)
		GCTS Board #:	2245
		Digital Filter:
		Running Average:	200	(Hz)
		Warning Interlock:	NS
		Abort Interlock:	NS
		Software Offset:	9.2	(mm)
		Sensor ID:	Axial Displacement
			Sensor Type:	DC
			Model #:	Novotechnik TR-100
			Serial #:	_
			DC Sensor Output:	Ratiometric
			Parameter:	Displacement/Length
			Range	(mm):	Max:	50.8	Min:	-50.8
			Calibration:	Date:	07/18/13
			Type:	Linear - Two point
			Point	Engineering Value (mm)	Output (Volts/Volt)
			First	-50.8	-0.677971
			Second	50.8	0.68365
			Equation: Output ((mm)) =	74.6169	*(Volts/Volt)	+	-0.211857
		3	Frame Top Press.	Max:	22	(MPa)	Min:	-22	(MPa)
		Gain:	11.5723	=>	474	Counts
		Offset:	0.0439453	(Volts)	=>	2066	Counts
		GCTS Board #:	2214
		Digital Filter:
		Running Average:	50	(Hz)
		Warning Interlock:	NS
		Abort Interlock:	NS
		Software Offset:	-0.08	(MPa)
		Sensor ID:	Frame Top Press.
			Sensor Type:	SG
			Model #:	Omega PX300-3KGV
			Serial #:	_
			Parameter:	Pressure/Stress
			Range	(MPa):	Max:	22	Min:	-22
			Calibration:	Date:	07/15/13
			Type:	Linear - One point
			Full Scale Output:	3.19083	(mV/Volt)
			Offset:	0	(mV/Volt)
			Negative Output Correction Factor:	NS
			Equation: Output ((MPa)) =	6.89476	*(mV/Volt)	+	0
		4	Frame Bottom Press.	Max:	22	(MPa)	Min:	-22	(MPa)
		Gain:	11.792	=>	483	Counts
		Offset:	0.0341797	(Volts)	=>	2062	Counts
		GCTS Board #:	2209
		Digital Filter:
		Running Average:	50	(Hz)
		Warning Interlock:	NS
		Abort Interlock:	NS
		Software Offset:	-0.01	(MPa)
		Sensor ID:	Frame Bottom Press.
			Sensor Type:	SG
			Model #:	Omega PX300-3KGV
			Serial #:	_
			Parameter:	Pressure/Stress
			Range	(MPa):	Max:	22	Min:	-22
			Calibration:	Date:	07/15/13
			Type:	Linear - One point
			Full Scale Output:	3.19083	(mV/Volt)
			Offset:	0	(mV/Volt)
			Negative Output Correction Factor:	NS
			Equation: Output ((MPa)) =	6.89476	*(mV/Volt)	+	0
		5	Cell Pressure	Max:	150	(MPa)	Min:	-150	(MPa)
		Gain:	11.5967	=>	475	Counts
		Offset:	0.00732422	(Volts)	=>	2051	Counts
		GCTS Board #:	2243
		Digital Filter:
		Running Average:	50	(Hz)
		Warning Interlock:
			Max:	1	(MPa)
			Min:	NS
			Actions:
				Turn Off	Digital Output:	1	Deadband:	0.2	(MPa)
			Issue Warning:	NS
		Abort Interlock:
			Max:	130	(MPa)
			Min:	NS
		Software Offset:	-0.3	(MPa)
		Sensor ID:	Cell Pressure
			Sensor Type:	SG
			Model #:	Omega PX35S1-20KGV
			Serial #:	312021
			Parameter:	Pressure/Stress
			Range	(MPa):	Max:	150	Min:	-150
			Calibration:	Date:	2016-09-06
			Type:	Linear - One point
			Full Scale Output:	3.17043	(mV/Volt)
			Offset:	0	(mV/Volt)
			Negative Output Correction Factor:	NS
			Equation: Output ((MPa)) =	47.3121	*(mV/Volt)	+	0
		6	Cell Pressure Disp.	Max:	127	(mm)	Min:	-127	(mm)
		Gain:	2.0752	=>	85	Counts
		Offset:	-0.0268555	(Volts)	=>	2037	Counts
		GCTS Board #:	2222
		Digital Filter:
		Running Average:	50	(Hz)
		Warning Interlock:	NS
		Abort Interlock:	NS
		Software Offset:	0	(mm)
		Sensor ID:	Cell Pressure Disp.
			Sensor Type:	AC
			Model #:	MS PR750-5000
			Serial #:	_
			Parameter:	Displacement/Length
			Range	(mm):	Max:	127	Min:	-127
			Calibration:	Date:	2013-10-12
			Type:	Linear - Two point
			Point	Engineering Value (mm)	Output (Volts/Volt)
			First	-127	0.761722
			Second	127	-0.767474
			Equation: Output ((mm)) =	-166.1	*(Volts/Volt)	+	-0.477694
		7	Pore Pressure	Max:	150	(MPa)	Min:	-150	(MPa)
		Gain:	11.4258	=>	468	Counts
		Offset:	0.00244141	(Volts)	=>	2049	Counts
		GCTS Board #:	2219
		Digital Filter:
		Running Average:	50	(Hz)
		Warning Interlock:	NS
		Abort Interlock:
			Max:	130	(MPa)
			Min:	NS
		Software Offset:	-0.2	(MPa)
		Sensor ID:	Pore Pressure
			Sensor Type:	SG
			Model #:	Omega PX35S1-20KGV
			Serial #:	312009
			Parameter:	Pressure/Stress
			Range	(MPa):	Max:	150	Min:	-150
			Calibration:	Date:	07/29/13
			Type:	Linear - One point
			Full Scale Output:	3.53005	(mV/Volt)
			Offset:	0	(mV/Volt)
			Negative Output Correction Factor:	NS
			Equation: Output ((MPa)) =	42.4924	*(mV/Volt)	+	0
		8	Pore Pressure Disp.	Max:	127	(mm)	Min:	-127	(mm)
		Gain:	2.02637	=>	83	Counts
		Offset:	-0.0146484	(Volts)	=>	2042	Counts
		GCTS Board #:	2239
		Digital Filter:
		Running Average:	50	(Hz)
		Warning Interlock:	NS
		Abort Interlock:	NS
		Software Offset:	-125	(mm)
		Sensor ID:	Pore Pressure Disp.
			Sensor Type:	AC
			Model #:	MS PR750-5000
			Serial #:	_
			Parameter:	Displacement/Length
			Range	(mm):	Max:	127	Min:	-127
			Calibration:	Date:	2013-10-12
			Type:	Linear - Two point
			Point	Engineering Value (mm)	Output (Volts/Volt)
			First	127	-0.775146
			Second	-127	0.782099
			Equation: Output ((mm)) =	-163.109	*(Volts/Volt)	+	0.567045
		9	Axial Deformation 1	Max:	2.5	(mm)	Min:	-2.5	(mm)
		Gain:	13.916	=>	570	Counts
		Offset:	-0.0878906	(Volts)	=>	2012	Counts
		GCTS Board #:	2226
		Digital Filter:
		Running Average:	50	(Hz)
		Warning Interlock:	NS
		Abort Interlock:	NS
		Software Offset:	-1.622	(mm)
		Sensor ID:	Internal LVDT 1
			Sensor Type:	AC
			Model #:	MS CD375-100
			Serial #:	139915
			Parameter:	Displacement/Length
			Range	(mm):	Max:	2.5	Min:	-2.5
			Calibration:	Date:	10/17/16
			Type:	Non-Linear
			Non-LinearOutput ((mm)) = a0 + a1*X + a2*X² + a3*X³
			where X is in (Volts/Volt)
			a0:	-0.12667
			a1:	-20.2513
			a2:	-1.16703
			a3:	-83.1005
		10	Axial Deformation 2	Max:	2.5	(mm)	Min:	-2.5	(mm)
		Gain:	20.9717	=>	859	Counts
		Offset:	-0.119629	(Volts)	=>	1999	Counts
		GCTS Board #:	2269
		Digital Filter:
		Running Average:	50	(Hz)
		Warning Interlock:	NS
		Abort Interlock:	NS
		Software Offset:	-1.284	(mm)
		Sensor ID:	Internal LVDT 2
			Sensor Type:	AC
			Model #:	MS SR-DF-C375VHT-100
			Serial #:	J69434
			Parameter:	Displacement/Length
			Range	(mm):	Max:	2.5	Min:	-2.5
			Calibration:	Date:	11/29/16
			Type:	Non-Linear
			Non-LinearOutput ((mm)) = a0 + a1*X + a2*X² + a3*X³
			where X is in (Volts/Volt)
			a0:	-0.273025
			a1:	-33.9369
			a2:	-2.00738
			a3:	226.152
		11	Circum. Deformation	Max:	2.5	(mm)	Min:	-2.5	(mm)
		Gain:	13.623	=>	558	Counts
		Offset:	-0.0683594	(Volts)	=>	2020	Counts
		GCTS Board #:	2268
		Digital Filter:
		Running Average:	50	(Hz)
		Warning Interlock:	NS
		Abort Interlock:	NS
		Software Offset:	-1.147	(mm)
		Sensor ID:	Internal LVDT 3
			Sensor Type:	AC
			Model #:	MS CD375-100-0857
			Serial #:	181224
			Parameter:	Displacement/Length
			Range	(mm):	Max:	2.5	Min:	-2.5
			Calibration:	Date:	11/29/16
			Type:	Non-Linear
			Non-LinearOutput ((mm)) = a0 + a1*X + a2*X² + a3*X³
			where X is in (Volts/Volt)
			a0:	-0.136988
			a1:	-20.0543
			a2:	-2.91077
			a3:	-98.0393
		12	Inner Temperature	Max:	220	(deg C)	Min:	0	(deg C)
		DC External Excitation:
			Max:	1	(VDC)
			Min:	0	(VDC)
		Digital Filter:
		Filter Points:	1000
		Warning Interlock:
			Max:	80	(deg C)
			Min:	NS
			Actions:
				Turn Off	Digital Output:	1	Deadband:	5	(deg C)
			Issue Warning:	Selected
		Abort Interlock:
			Max:	205	(deg C)
			Min:	NS
		Software Offset:	0	(deg C)
		Sensor ID:	Inner Temperature
			Sensor Type:	DC
			Model #:	HPM0310W
			Serial #:	_
			DC Sensor Output:	Absolute
			Parameter:	Temperature
			Range	(deg C):	Max:	220	Min:	0
			Calibration:	Date:	07/15/13
			Type:	Linear - Two point
			Point	Engineering Value (deg C)	Output (Volts)
			First	0	0
			Second	220	10
			Equation: Output ((deg C)) =	22	*(Volts)	+	0
		13	Wall Temperature	Max:	220	(deg C)	Min:	0	(deg C)
		DC External Excitation:
			Max:	1	(VDC)
			Min:	0	(VDC)
		Digital Filter:
		Filter Points:	1000
		Warning Interlock:	NS
		Abort Interlock:
			Max:	210	(deg C)
			Min:	NS
		Software Offset:	-3.2	(deg C)
		Sensor ID:	Wall Temperature
			Sensor Type:	DC
			Model #:	SA1-K-236
			Serial #:	_
			DC Sensor Output:	Absolute
			Parameter:	Temperature
			Range	(deg C):	Max:	220	Min:	0
			Calibration:	Date:	07/15/13
			Type:	Linear - Two point
			Point	Engineering Value (deg C)	Output (Volts)
			First	0	0
			Second	220	10
			Equation: Output ((deg C)) =	22	*(Volts)	+	0
		14	SCON Tempertr	Max:	150	(deg C)	Min:	-50	(deg C)
		DC External Excitation:
			Max:	1	(VDC)
			Min:	0	(VDC)
		Digital Filter:
		Running Average:	0.1	(Hz)
		Warning Interlock:
			Max:	45	(deg C)
			Min:	NS
			Actions:	(none)
			Issue Warning:	Selected
		Abort Interlock:	NS
		Software Offset:	0	(deg C)
		Sensor ID:	SCON Tempertr
			Sensor Type:	DC
			Model #:	AD22100
			Serial #:	_
			DC Sensor Output:	Absolute
			Parameter:	Temperature
			Range	(deg C):	Max:	150	Min:	-50
			Calibration:	Date:	07/15/13
			Type:	Linear - Two point
			Point	Engineering Value (deg C)	Output (Volts)
			First	-50	0.25
			Second	150	4.75
			Equation: Output ((deg C)) =	44.4444	*(Volts)	+	-61.1111
		15	Pump Oil Level	Max:	40	(cm)	Min:	0	(cm)
		DC External Excitation:
			Max:	1	(VDC)
			Min:	0	(VDC)
		Digital Filter:
		Running Average:	0.1	(Hz)
		Warning Interlock:
			Max:	NS
			Min:	15	(cm)
			Actions:	(none)
			Issue Warning:	Selected
		Abort Interlock:
			Max:	NS
			Min:	10	(cm)
		Software Offset:	0	(cm)
		Sensor ID:	Pump Oil Level
			Sensor Type:	DC
			Model #:	MPX5010
			Serial #:	_
			DC Sensor Output:	Absolute
			Parameter:	Displacement/Length
			Range	(cm):	Max:	40	Min:	0
			Calibration:	Date:	07/15/13
			Type:	Linear - Two point
			Point	Engineering Value (cm)	Output (Volts)
			First	0	0.2
			Second	25	1.1
			Equation: Output ((cm)) =	27.7778	*(Volts)	+	-5.55556
		16	Pump Oil Temperature	Max:	150	(deg C)	Min:	-50	(deg C)
		DC External Excitation:
			Max:	1	(VDC)
			Min:	0	(VDC)
		Digital Filter:
		Running Average:	0.1	(Hz)
		Warning Interlock:
			Max:	65	(deg C)
			Min:	NS
			Actions:	(none)
			Issue Warning:	Selected
		Abort Interlock:
			Max:	80	(deg C)
			Min:	NS
		Software Offset:	0	(deg C)
		Sensor ID:	Pump Oil Temperature
			Sensor Type:	DC
			Model #:	AD22100
			Serial #:	_
			DC Sensor Output:	Absolute
			Parameter:	Temperature
			Range	(deg C):	Max:	150	Min:	-50
			Calibration:	Date:	07/15/13
			Type:	Linear - Two point
			Point	Engineering Value (deg C)	Output (Volts)
			First	-50	0.25
			Second	150	4.75
			Equation: Output ((deg C)) =	44.4444	*(Volts)	+	-61.1111
		17	Not Defined
		18	Avg. Axial Deform.	Max:	2.5	(mm)	Min:	-2.5	(mm)
			Inputs Function:
				0.5	*AI-9: Axial Deformation 1+0.5	*AI-10: Axial Deformation 2			Coefficient for Inputs Function:	1
		Software Offset:	-0.006	(mm)
		19	Load (Press.)	Max:	4000	(kN)	Min:	-4000	(kN)
			Inputs Function:
				0.223458	*AI-3: Frame Top Press.+-0.223458	*AI-4: Frame Bottom Press.
				0.0324293	*AI-4: Frame Bottom Press.			Coefficient for Inputs Function:	1
		Software Offset:	0	(kN)
		20	Not Defined
		21	Not Defined
		22	Not Defined
		23	Not Defined
		24	Not Defined
		25	corrected int load	Max:	1100	(kN)	Min:	-100	(kN)
				Input Y:	AI-1: Axial Load
				Input X:	AI-5: Cell Pressure
				a0:	0
				a1:	0.0566
				a2:	0
				a3:	0
		Software Offset:	0	(kN)
		26	Not Defined
		27	Not Defined
		28	Not Defined
		29	Not Defined
		30	Max:	290.589	(cm^3)	Min:	-290.589	(cm^3)
		31	Max:	197.078	(cm^3)	Min:	-197.078	(cm^3)
		32	Not Defined
Triaxial Analog Outputs
		1	Axial Actuator
		Valve:	Servo
		Static
			Max Control Error:	20	(pfs)
			Max Control Rate:	5	(pfs/sec)
		Dynamic
			Max Control Error:	50	(pfs)
			Peak & Valley Compensation:
				Sensitivity:	0.05	(pfs)
				Convergence Rate:	25	(%)
		Dither:
			Amplitude:	0.165	(Volts)
			Frequency:	150	(Hz)
		Digital Output Control:	0
			Control Type:	AO:On=>DO:On	AO:Off=>DO:Off *
		Primary Feedbacks
			Force/Pressure/Torque:	AI-1: Axial Load
			Displacement/Volume:	AI-2: Axial Displacement
		2	Cell Pressure
		Valve:	Servo
		Static
			Max Control Error:	20	(pfs)
			Max Control Rate:	1	(pfs/sec)
		Dynamic
			Max Control Error:	50	(pfs)
			Peak & Valley Compensation:
				Sensitivity:	0.05	(pfs)
				Convergence Rate:	25	(%)
		Dither:
			Amplitude:	0.1	(Volts)
			Frequency:	125	(Hz)
		Digital Output Control:	1
			Control Type:	AO:On=>DO:On	AO:Off=>DO:Off *
		Primary Feedbacks
			Force/Pressure/Torque:	AI-5: Cell Pressure
			Displacement/Volume:	AI-6: Cell Pressure Disp.
		3	Pore Pressure
		Valve:	Servo
		Static
			Max Control Error:	20	(pfs)
			Max Control Rate:	2	(pfs/sec)
		Dynamic
			Max Control Error:	50	(pfs)
			Peak & Valley Compensation:
				Sensitivity:	0.05	(pfs)
				Convergence Rate:	25	(%)
		Dither:
			Amplitude:	0.1	(Volts)
			Frequency:	125	(Hz)
		Digital Output Control:	2
			Control Type:	AO:On=>DO:On	AO:Off=>DO:Off *
		Primary Feedbacks
			Force/Pressure/Torque:	AI-7: Pore Pressure
			Displacement/Volume:	AI-8: Pore Pressure Disp.
		4	Slave - Do Not Use!
		Valve:	Servo
		Static
			Max Control Error:	20	(pfs)
			Max Control Rate:	5	(pfs/sec)
		Dynamic
			Max Control Error:	50	(pfs)
			Peak & Valley Compensation:
				Sensitivity:	0.05	(pfs)
				Convergence Rate:	25	(%)
		Dither:	NS
		Slave:
			Master Output: 0
			Master Feedback:	Master Output
			Slave Proportional Factor:	-1
			Turn OFF Slave When Turning OFF Master
		Digital Output Control:	NS
Triaxial Temperature Outputs
		1	Temperature Control
		Temperature Control:
			(Main) Digital Output:	DO-4: Temperature Control
			Temperature Input:	AI-12: Inner Temperature
			Max Control Rate:	1	(deg C)/min
		Secondary Temperature Limit Control:
			Secondary Input:	AI-13: Wall Temperature
			Temperature Offset:	5	(deg C)
		Coolant Control - if heating:	NS
		Circulation Control:	NS
		Duty Cycle:	6	(sec)
		PID Algorithm:	Velocity
		Integral Component Windup Limit:	100	(pfs)
		Deadband:	0	(deg C)
PID Tuning Control Parameters
		Output:	AO-1: Axial Actuator
		Feedback Input:	TI-7: Sd - Deviator Stress
			P	20
			I	1.15
			D	0.0001
			Polarity:	Inverse
			Forward Gain:	0
			Forward Loop Filter:	500	(Hz)
			Stabilization:	NS
		Output:	AO-1: Axial Actuator
		Feedback Input:	TI-1: Ea - Axial Strain
			P	16.6
			I	1.3
			D	0.0001
			Polarity:	Inverse
			Forward Gain:	0
			Forward Loop Filter:	500	(Hz)
			Stabilization:	NS
		Output:	AO-1: Axial Actuator
		Feedback Input:	AI-2: Axial Displacement
			P	38.2
			I	4.25
			D	0.0003
			Polarity:	Inverse
			Forward Gain:	0
			Forward Loop Filter:	500	(Hz)
			Stabilization:	NS
		Output:	AO-2: Cell Pressure
		Feedback Input:	AI-5: Cell Pressure
			P	27.6
			I	1.3
			D	0.001
			Polarity:	Normal
			Forward Gain:	0
			Forward Loop Filter:	500	(Hz)
			Stabilization:	NS
		Output:	AO-2: Cell Pressure
		Feedback Input:	TI-2: Er - Radial Strain
			P	6.6
			I	1.25
			D	0.001
			Polarity:	Normal
			Forward Gain:	0
			Forward Loop Filter:	500	(Hz)
			Stabilization:	NS
Triaxial Configuration
		Control
			Axial Actuator:	AO-1: Axial Actuator
			Cell Pressure:	AO-2: Cell Pressure
			Pore Pressure:	AO-3: Pore Pressure
			Air Pore Pressure:	None - Manual
			Pore Pressure Stabilization Time:	2	(Minute(s))
		Hardware
			Loading Piston Area:	0	m^2
			Seating/Contact Stress:	1	(MPa)
			Lateral Deformation Measurement:	Circumferencial
				Chain Length:	160.02	(mm)
				Roller Radius:	4.76	(mm)
			Pore Pressure Drain Valve Control:	Manual Valve
		Inputs
			Axial Load:	UCI-1: corrected int load
			Frame Axial Displacement:	AI-2: Axial Displacement
			Gauge Axial Deformation:	UFI-1: Avg. Axial Deform.
			CP - Cell Pressure:	AI-5: Cell Pressure
			U - Pore Pressure:	AI-7: Pore Pressure
			Lateral Deformation:	AI-11: Circum. Deformation
			External (Cell) Volume:	PVC-1: Cell PVC Total Volum
			Pore Volume:	PVC-2: Back PVC Total Volum
			Ua - Pore Air Pressure:	(none)
		Specimen
			Calculation of Radial Strain - Er:	Er = measured dr/R
			Calculation of Volumetric Strain - Ev:	Ev = Ea + 2Er
			Strain Handling Threshold:	100	(µe)
Triaxial Setup
		Stages:	6
		1: Static: Prestress
			Axial Actuator
				Control Feedback:	TI-7: Sd - Deviator Stress
				Mode:	Ramp
					Initial Value: Relative/Current
					Ramp Rate:	3	(MPa)/(Minute(s))
					Final Value:	2	(MPa)
			Cell Pressure
				Control Feedback:	AI-5: Cell Pressure
				Mode:	Ramp
					Initial Value: Relative/Current
					Ramp Rate:	3	(MPa)/(Minute(s))
					Final Value:	2	(MPa)
			Pore Pressure
				Control Feedback:	None - Control Undefined
			Stage End
				Maximum Axial Strain:	40000	(µe)
				Maximum Time for Static Loading Stage:	NS
				Input Limit:	NS
				Peak Reversal:	NS
			Data Acquisition:	Automatic
			Type:	Drained
			Beginning of Stage - Handling Strains:
				Update Specimen Dimensions
				Zero Deformations
		2: Static: Prestress hold
			Axial Actuator
				Control Feedback:	TI-7: Sd - Deviator Stress
				Mode:	Constant
					Constant Value:	Absolute/Change to:	2	(MPa)
			Cell Pressure
				Control Feedback:	AI-5: Cell Pressure
				Mode:	Constant
					Constant Value:	Absolute/Change to:	2	(MPa)
			Pore Pressure
				Control Feedback:	None - Control Undefined
			Stage End
				Maximum Axial Strain:	40000	(µe)
				Maximum Time for Static Loading Stage:	NS
				Input Limit:	NS
				Peak Reversal:	NS
			Data Acquisition:	Automatic
			Type:	Drained
			Beginning of Stage - Handling Strains:	(none)
		3: Static: Constant strain
			Axial Actuator
				Control Feedback:	TI-1: Ea - Axial Strain
				Mode:	Constant
					Constant Value:	Relative/Current
			Cell Pressure
				Control Feedback:	TI-2: Er - Radial Strain
				Mode:	Constant
					Constant Value:	Relative/Current
			Pore Pressure
				Control Feedback:	None - Control Undefined
			Stage End
				Maximum Axial Strain:	40000	(µe)
				Maximum Time for Static Loading Stage:	NS
				Input Limit:
					Input:	AI-5: Cell Pressure
					Check Type:	>=
					Check Value:	10	(MPa)
				Peak Reversal:	NS
			Data Acquisition:	Automatic
			Type:	Drained
			Beginning of Stage - Handling Strains:	(none)
		4: Static: Prestress 2
			Axial Actuator
				Control Feedback:	TI-7: Sd - Deviator Stress
				Mode:	Ramp
					Initial Value: Relative/Current
					Ramp Rate:	3	(MPa)/(Minute(s))
					Final Value:	2	(MPa)
			Cell Pressure
				Control Feedback:	AI-5: Cell Pressure
				Mode:	Ramp
					Initial Value: Relative/Current
					Ramp Rate:	3	(MPa)/(Minute(s))
					Final Value:	2	(MPa)
			Pore Pressure
				Control Feedback:	None - Control Undefined
			Stage End
				Maximum Axial Strain:	40000	(µe)
				Maximum Time for Static Loading Stage:	NS
				Input Limit:	NS
				Peak Reversal:	NS
			Data Acquisition:	Automatic
			Type:	Drained
			Beginning of Stage - Handling Strains:	(none)
		5: Static: Release cell pressurd·_x0015_
			Axial Actuator
				Control Feedback:	TI-7: Sd - Deviator Stress
				Mode:	Constant
					Constant Value:	Absolute/Change to:	2	(MPa)
			Cell Pressure
				Control Feedback:	AI-5: Cell Pressure
				Mode:	Ramp
					Initial Value: Relative/Current
					Ramp Rate:	-3	(MPa)/(Minute(s))
					Final Value:	0.2	(MPa)
			Pore Pressure
				Control Feedback:	None - Control Undefined
			Stage End
				Maximum Axial Strain:	30000	(µe)
				Maximum Time for Static Loading Stage:	NS
				Input Limit:
					Input:	AI-5: Cell Pressure
					Check Type:	<=
					Check Value:	0.3	(MPa)
				Peak Reversal:
				Input:	TI-7: Sd - Deviator Stress
				Reversal Value:	0.5	(MPa)
				Threshold:	1	(MPa)
			Data Acquisition:	Automatic
			Type:	Drained
			Beginning of Stage - Handling Strains:	(none)
		6: Static: _
			Axial Actuator
				Control Feedback:	AI-2: Axial Displacement
				Mode:	Constant
					Constant Value:	Relative/Current
			Cell Pressure
				Control Feedback:	None - Control Undefined
			Pore Pressure
				Control Feedback:	None - Control Undefined
			Stage End
				Maximum Axial Strain:	NS
				Maximum Time for Static Loading Stage:	0.1	(Minute(s))
				Input Limit:	NS
				Peak Reversal:	NS
			Data Acquisition:	Automatic
			Type:	Drained
			Beginning of Stage - Handling Strains:	(none)
		Save Objects - Save @ each Recording:
			Time
			Inputs:	18
				AI-1: Axial Load
				AI-2: Axial Displacement
				AI-3: Frame Top Press.
				AI-4: Frame Bottom Press.
				AI-5: Cell Pressure
				AI-6: Cell Pressure Disp.
				AI-7: Pore Pressure
				AI-8: Pore Pressure Disp.
				AI-9: Axial Deformation 1
				AI-10: Axial Deformation 2
				AI-11: Circum. Deformation
				UFI-1: Avg. Axial Deform.
				UFI-2: Load (Press.)
				UCI-1: corrected int load
				TI-1: Ea - Axial Strain
				TI-2: Er - Radial Strain
				TI-3: Ev - Volumetric Strain
				TI-7: Sd - Deviator Stress
			Analog Outputs:	0
			Ultrasonics
				P wave:	NS
				S wave:	NS
Test Results:		Completed
Stages:		6
Stage Index:		1
		Type:	Static Loading
		Specimen:
			Height:	115.84	(mm)
			Axial Gauge Length:	115.84	(mm)
			Diameter:	54	(mm)
			Area:	22.902	cm^2
			Volume:	265.299	cm^3
		Stage ended because	User forced
		Max (Peak) Sd - Deviator Stress:	2.2	(MPa)
			Time:	43.4641	(Seconds)
			CP - Cell Pressure:	2.4	(MPa)
			U - Pore Pressure:	0	(MPa)
			Ea - Axial Strain:	7670	(µe)
			Er - Radial Strain:	6781	(µe)
			Ev - Volumetric Strain:	21082	(µe)
			Sa - Axial Stress:	4.6	(MPa)
			Sa' - Axial Effective Stress:	4.6	(MPa)
			Sc' - Cell Effective Pressure:	2.5	(MPa)
		End (Residual) Sd - Deviator Stress:	2	(MPa)
			Time:	80.784	(Seconds)	=>	01:20:00
			CP - Cell Pressure:	2.1	(MPa)
			U - Pore Pressure:	0	(MPa)
			Ea - Axial Strain:	7663	(µe)
			Er - Radial Strain:	6803	(µe)
			Ev - Volumetric Strain:	21118	(µe)
			Sa - Axial Stress:	4.1	(MPa)
			Sa' - Axial Effective Stress:	4.1	(MPa)
			Sc' - Cell Effective Pressure:	2.1	(MPa)
Stage Index:		2
		Type:	Static Loading
		Specimen:
			Height:	115.84	(mm)
			Axial Gauge Length:	115.84	(mm)
			Diameter:	54	(mm)
			Area:	22.902	cm^2
			Volume:	265.299	cm^3
		Stage ended because	User forced
		Max (Peak) Sd - Deviator Stress:	2.1	(MPa)
			Time:	80.9638	(Seconds)	=>	01:20:00
			CP - Cell Pressure:	2.1	(MPa)
			U - Pore Pressure:	0	(MPa)
			Ea - Axial Strain:	7663	(µe)
			Er - Radial Strain:	6802	(µe)
			Ev - Volumetric Strain:	21118	(µe)
			Sa - Axial Stress:	4.2	(MPa)
			Sa' - Axial Effective Stress:	4.2	(MPa)
			Sc' - Cell Effective Pressure:	2.1	(MPa)
		End (Residual) Sd - Deviator Stress:	2	(MPa)
			Time:	409.654	(Seconds)	=>	06:49:00
			CP - Cell Pressure:	2	(MPa)
			U - Pore Pressure:	0	(MPa)
			Ea - Axial Strain:	7688	(µe)
			Er - Radial Strain:	6943	(µe)
			Ev - Volumetric Strain:	21420	(µe)
			Sa - Axial Stress:	4	(MPa)
			Sa' - Axial Effective Stress:	4	(MPa)
			Sc' - Cell Effective Pressure:	2	(MPa)
Stage Index:		3
		Type:	Static Loading
		Specimen:
			Height:	115.84	(mm)
			Axial Gauge Length:	115.84	(mm)
			Diameter:	54	(mm)
			Area:	22.902	cm^2
			Volume:	265.299	cm^3
		Stage ended because	User forced
		Max (Peak) Sd - Deviator Stress:	2.3	(MPa)
			Time:	1601.78	(Seconds)	=>	1 day, 2:41:00
			CP - Cell Pressure:	0.9	(MPa)
			U - Pore Pressure:	-0.1	(MPa)
			Ea - Axial Strain:	7689	(µe)
			Er - Radial Strain:	6876	(µe)
			Ev - Volumetric Strain:	21288	(µe)
			Sa - Axial Stress:	3.3	(MPa)
			Sa' - Axial Effective Stress:	3.3	(MPa)
			Sc' - Cell Effective Pressure:	1	(MPa)
		End (Residual) Sd - Deviator Stress:	0.6	(MPa)
			Time:	5810.18	(Seconds)	=>	01:36:50
			CP - Cell Pressure:	0.2	(MPa)
			U - Pore Pressure:	-0.2	(MPa)
			Ea - Axial Strain:	7689	(µe)
			Er - Radial Strain:	6945	(µe)
			Ev - Volumetric Strain:	21424	(µe)
			Sa - Axial Stress:	0.8	(MPa)
			Sa' - Axial Effective Stress:	1	(MPa)
			Sc' - Cell Effective Pressure:	0.4	(MPa)
Stage Index:		4
		Type:	Static Loading
		Specimen:
			Height:	115.84	(mm)
			Axial Gauge Length:	115.84	(mm)
			Diameter:	54	(mm)
			Area:	22.902	cm^2
			Volume:	265.299	cm^3
		Stage ended because	User forced
		Max (Peak) Sd - Deviator Stress:	2.2	(MPa)
			Time:	5853.55	(Seconds)	=>	01:37:33
			CP - Cell Pressure:	2.1	(MPa)
			U - Pore Pressure:	-0.2	(MPa)
			Ea - Axial Strain:	21494	(µe)
			Er - Radial Strain:	11288	(µe)
			Ev - Volumetric Strain:	43460	(µe)
			Sa - Axial Stress:	4.3	(MPa)
			Sa' - Axial Effective Stress:	4.5	(MPa)
			Sc' - Cell Effective Pressure:	2.3	(MPa)
		End (Residual) Sd - Deviator Stress:	2	(MPa)
			Time:	5970.36	(Seconds)	=>	01:39:30
			CP - Cell Pressure:	2	(MPa)
			U - Pore Pressure:	-0.2	(MPa)
			Ea - Axial Strain:	23258	(µe)
			Er - Radial Strain:	12177	(µe)
			Ev - Volumetric Strain:	46900	(µe)
			Sa - Axial Stress:	4	(MPa)
			Sa' - Axial Effective Stress:	4.2	(MPa)
			Sc' - Cell Effective Pressure:	2.2	(MPa)
Stage Index:		5
		Type:	Static Loading
		Specimen:
			Height:	115.84	(mm)
			Axial Gauge Length:	115.84	(mm)
			Diameter:	54	(mm)
			Area:	22.902	cm^2
			Volume:	265.299	cm^3
		Stage ended because	Input Limit Duration reached
		Max (Peak) Sd - Deviator Stress:	2.1	(MPa)
			Time:	5985	(Seconds)	=>	01:39:44
			CP - Cell Pressure:	1.4	(MPa)
			U - Pore Pressure:	-0.2	(MPa)
			Ea - Axial Strain:	23254	(µe)
			Er - Radial Strain:	11544	(µe)
			Ev - Volumetric Strain:	45674	(µe)
			Sa - Axial Stress:	3.4	(MPa)
			Sa' - Axial Effective Stress:	3.6	(MPa)
			Sc' - Cell Effective Pressure:	1.6	(MPa)
		End (Residual) Sd - Deviator Stress:	1.8	(MPa)
			Time:	6007.77	(Seconds)	=>	01:40:07
			CP - Cell Pressure:	0.3	(MPa)
			U - Pore Pressure:	-0.2	(MPa)
			Ea - Axial Strain:	26020	(µe)
			Er - Radial Strain:	5101	(µe)
			Ev - Volumetric Strain:	35931	(µe)
			Sa - Axial Stress:	2.1	(MPa)
			Sa' - Axial Effective Stress:	2.3	(MPa)
			Sc' - Cell Effective Pressure:	0.5	(MPa)
Stage Index:		6
		Type:	Static Loading
		Specimen:
			Height:	115.84	(mm)
			Axial Gauge Length:	115.84	(mm)
			Diameter:	54	(mm)
			Area:	22.902	cm^2
			Volume:	265.299	cm^3
		Stage ended because	Time Duration reached
		Max (Peak) Sd - Deviator Stress:	1.8	(MPa)
			Time:	6007.8	(Seconds)	=>	01:40:07
			CP - Cell Pressure:	0.3	(MPa)
			U - Pore Pressure:	-0.2	(MPa)
			Ea - Axial Strain:	26037	(µe)
			Er - Radial Strain:	5067	(µe)
			Ev - Volumetric Strain:	35883	(µe)
			Sa - Axial Stress:	2.1	(MPa)
			Sa' - Axial Effective Stress:	2.3	(MPa)
			Sc' - Cell Effective Pressure:	0.5	(MPa)
		End (Residual) Sd - Deviator Stress:	1.4	(MPa)
			Time:	6013.77	(Seconds)	=>	01:40:13
			CP - Cell Pressure:	0.2	(MPa)
			U - Pore Pressure:	-0.2	(MPa)
			Ea - Axial Strain:	26170	(µe)
			Er - Radial Strain:	3726	(µe)
			Ev - Volumetric Strain:	33413	(µe)
			Sa - Axial Stress:	1.6	(MPa)
			Sa' - Axial Effective Stress:	1.8	(MPa)
			Sc' - Cell Effective Pressure:	0.3	(MPa)
Data Points (Rows):		3231
																																			NGI-plot
Time	Time	Sd - Deviator Stress	Cell Pressure	Pore Pressure	Ea - Axial Strain	Er - Radial Strain	Ev - Volumetric Strain	Axial Load	Axial Displacement	Frame Top Press.	Frame Bottom Press.	Cell Pressure Disp.	Pore Pressure Disp.	Axial Deformation 1	Axial Deformation 2	Circum. Deformation	Avg. Axial Deform.	Load (Press.)	corrected int load	Eoct - Octahedral Strain	Shear Strain	Ac - Corrected Area	Sa - Axial Stress	Sa' - Axial Effective Stress	Sc' - Cell Effective Pressure	p Cambridge Mohr Stress	p' Cambridge Mohr Effective Stress	p MIT Mohr Parameter Stress	p' MIT Mohr Effective Stress	q Mohr Parameter Stress	Toct - Octahedral Shear Stress	Uexs - Excess Pore Pressure	Es - Secant Modulus	u - Poisson's Ratio	(Sc+Sa)/2	Sd/2
Min	sec	MPa	MPa	MPa	micro e	micro e	micro e	kN	mm	MPa	MPa	mm	mm	mm	mm	mm	mm	kN	kN	micro e	micro e	cm^2	MPa	MPa	MPa	MPa	MPa	MPa	MPa	MPa	MPa	MPa	MPa	_
8.14337e-06	0.000488602	-0.02	-0.03	-0.01	63.2	-4.2	54.7	0	-39.91	2.687	3.129	-23.46	20.89	-0.0001	0.0028	-0.0006	0.0073	3	-0.036	18.2	67.4	22.9024	-0.04	-0.03	-0.02	-0.03	-0.02	-0.04	-0.02	-0.01	-0.01	0	-246.28	0.067	-0.035	-0.01
0.0333308	1.99985	0	0	-0.01	117.9	-1.6	114.7	0	-39.91	2.69	3.113	-22.79	20.93	0.0062	0.0092	-0.0002	0.0137	6.7	0	38.2	119.5	22.9023	0	0.01	0.01	0	0.01	0	0.01	0	0	0	-0.97	0.014	0	0
0.0531925	3.19155	0.03	0	-0.02	217.9	3.2	224.3	0.1	-39.88	2.681	3.101	-22.3	20.93	0.021	0.0176	0.0005	0.0252	6.9	0.068	74.8	214.8	22.9021	0.03	0.05	0.02	0.01	0.03	0.02	0.04	0.01	0.01	0	137.03	0.015	0.015	0.015
0.0662137	3.97282	0.04	0	-0.01	318.3	2.7	323.6	0.1	-39.87	2.672	3.092	-21.91	20.94	0.0359	0.0259	0.0004	0.0369	6.8	0.102	107.9	315.6	22.9021	0.05	0.06	0.01	0.02	0.03	0.03	0.04	0.02	0.02	0	140.57	0.008	0.025	0.02
0.0666617	3.9997	0.03	0.01	-0.01	322	1.6	325.1	0.1	-39.87	2.672	3.092	-21.89	20.93	0.0365	0.0262	0.0002	0.0373	6.8	0.069	108.4	320.4	22.9021	0.04	0.05	0.02	0.02	0.03	0.02	0.04	0.01	0.01	0	93.11	0.005	0.025	0.015
0.0763278	4.57967	0.04	0.01	-0.01	422.1	-4.2	413.6	0.1	-39.86	2.667	3.086	-21.58	20.93	0.0487	0.0372	-0.0006	0.0489	6.7	0.103	137.9	426.3	22.9024	0.06	0.07	0.03	0.03	0.04	0.04	0.05	0.02	0.02	0	106.54	0.01	0.035	0.02
0.0850248	5.10149	0.09	0.02	-0.01	522.3	-14.3	493.6	0.2	-39.84	2.663	3.081	-21.26	20.94	0.0596	0.0496	-0.002	0.0605	6.9	0.205	164.5	536.6	22.9029	0.11	0.12	0.03	0.05	0.06	0.06	0.08	0.04	0.04	0	171.75	0.027	0.065	0.045
0.093038	5.58228	0.1	0.02	-0.01	622.5	-25.5	571.5	0.2	-39.82	2.66	3.076	-20.96	20.94	0.07	0.0623	-0.0036	0.0721	7	0.24	190.5	648	22.9034	0.13	0.14	0.04	0.06	0.07	0.08	0.09	0.05	0.05	0	168.18	0.041	0.075	0.05
0.0999925	5.99955	0.12	0.02	-0.01	715.2	-36.6	642	0.3	-39.8	2.657	3.073	-20.67	20.94	0.0797	0.0741	-0.0052	0.0829	6.9	0.274	214	751.9	22.9039	0.14	0.15	0.03	0.06	0.07	0.08	0.09	0.06	0.06	0	167.16	0.051	0.08	0.06
0.107215	6.43293	0.13	0.02	-0.02	815.4	-49.4	716.6	0.3	-39.79	2.655	3.07	-20.37	20.94	0.0905	0.0865	-0.007	0.0945	7.3	0.308	238.9	864.8	22.9045	0.16	0.17	0.04	0.07	0.08	0.09	0.11	0.07	0.06	0	164.86	0.061	0.09	0.065
0.114056	6.84336	0.15	0.03	-0.01	915.8	-65.3	785.3	0.3	-39.78	2.653	3.067	-20.07	20.93	0.1019	0.0983	-0.0093	0.1061	7.2	0.342	261.7	981.1	22.9052	0.18	0.19	0.04	0.08	0.09	0.11	0.12	0.07	0.07	0	163.27	0.071	0.105	0.075
0.12084	7.25037	0.19	0.03	-0.01	1015.8	-81.8	852.3	0.4	-39.77	2.651	3.065	-19.75	20.93	0.1133	0.1102	-0.0116	0.1177	7.1	0.445	284.1	1097.6	22.906	0.23	0.24	0.04	0.1	0.11	0.13	0.14	0.1	0.09	0	191.11	0.081	0.13	0.095
0.127305	7.63832	0.19	0.04	-0.01	1115.9	-101.5	913.1	0.4	-39.76	2.649	3.063	-19.44	20.92	0.1244	0.1222	-0.0144	0.1293	7.2	0.445	304.3	1217.3	22.9069	0.23	0.24	0.05	0.1	0.11	0.13	0.15	0.1	0.09	0	174.07	0.091	0.135	0.095
0.133323	7.99939	0.22	0.04	-0.01	1210.2	-123.8	962.9	0.5	-39.74	2.647	3.061	-19.13	20.92	0.135	0.1335	-0.0176	0.1402	7.1	0.513	320.8	1334	22.9079	0.26	0.27	0.05	0.11	0.12	0.15	0.16	0.11	0.11	0	185.08	0.102	0.15	0.11
0.139626	8.37757	0.21	0.04	-0.02	1310.8	-148.8	1013.5	0.5	-39.74	2.647	3.058	-18.8	20.92	0.1461	0.1457	-0.0211	0.1518	7.5	0.479	337.7	1459.6	22.909	0.25	0.27	0.06	0.11	0.13	0.15	0.16	0.1	0.1	0	159.6	0.114	0.145	0.105
0.145717	8.74305	0.24	0.04	-0.02	1411.1	-177.5	1056.5	0.5	-39.73	2.646	3.056	-18.47	20.92	0.1575	0.1575	-0.0252	0.1635	7.7	0.547	352	1588.6	22.9103	0.28	0.3	0.06	0.12	0.14	0.16	0.18	0.12	0.11	0	169.33	0.126	0.16	0.12
0.151735	9.10412	0.28	0.05	-0.01	1511.3	-208.4	1095.2	0.6	-39.71	2.643	3.055	-18.13	20.92	0.1689	0.1693	-0.0296	0.1751	7.3	0.65	364.9	1719.7	22.9118	0.33	0.34	0.06	0.14	0.15	0.19	0.2	0.14	0.13	0	187.67	0.138	0.19	0.14
0.15768	9.4608	0.33	0.05	-0.02	1611.6	-238.2	1135.8	0.7	-39.69	2.643	3.053	-17.78	20.91	0.1804	0.1811	-0.0338	0.1867	7.5	0.752	378.4	1849.7	22.9131	0.38	0.4	0.07	0.16	0.18	0.22	0.23	0.16	0.15	0	203.74	0.148	0.215	0.165
0.163608	9.8165	0.3	0.05	-0.02	1711.7	-268.5	1175.5	0.7	-39.68	2.642	3.051	-17.42	20.92	0.1918	0.1928	-0.0381	0.1983	7.7	0.684	391.5	1980.3	22.9145	0.34	0.37	0.07	0.15	0.17	0.2	0.22	0.15	0.14	0	174.37	0.157	0.195	0.15
0.166654	9.99924	0.36	0.05	-0.02	1762.8	-284.5	1194.7	0.8	-39.67	2.641	3.05	-17.23	20.91	0.1975	0.199	-0.0404	0.2042	7.7	0.82	397.9	2047.4	22.9152	0.4	0.42	0.06	0.17	0.18	0.23	0.24	0.18	0.17	0	203.04	0.161	0.225	0.18
0.17268	10.3608	0.37	0.05	-0.01	1863	-314.9	1234.3	0.9	-39.66	2.64	3.05	-16.85	20.92	0.209	0.2107	-0.0447	0.2158	7.5	0.855	411.1	2177.9	22.9166	0.42	0.44	0.06	0.18	0.19	0.24	0.25	0.19	0.18	0	200.15	0.169	0.235	0.185
0.178633	10.718	0.36	0.06	-0.01	1963.1	-346.3	1271.6	0.8	-39.65	2.639	3.048	-16.47	20.91	0.2206	0.2223	-0.0492	0.2274	7.6	0.821	423.5	2309.4	22.9181	0.42	0.43	0.07	0.18	0.19	0.24	0.25	0.18	0.17	0	182.48	0.176	0.24	0.18
0.184602	11.0761	0.4	0.06	-0.02	2063.4	-376.2	1312.4	0.9	-39.64	2.638	3.046	-16.07	20.92	0.2327	0.2335	-0.0534	0.239	7.9	0.923	437	2439.6	22.9194	0.47	0.48	0.08	0.2	0.22	0.27	0.28	0.2	0.19	0	195.26	0.182	0.265	0.2
0.190677	11.4406	0.42	0.07	-0.02	2163.7	-407.1	1351	1	-39.62	2.638	3.045	-15.65	20.92	0.2447	0.2447	-0.0578	0.2506	8.1	0.958	449.8	2570.8	22.9209	0.49	0.5	0.09	0.21	0.23	0.28	0.3	0.21	0.2	0	193.12	0.188	0.28	0.21
0.196597	11.7958	0.45	0.07	-0.02	2264.2	-435.4	1395.2	1	-39.61	2.637	3.044	-15.22	20.92	0.257	0.2557	-0.0618	0.2623	7.9	1.026	464.5	2699.7	22.9222	0.52	0.54	0.09	0.22	0.24	0.3	0.31	0.22	0.21	0	197.71	0.192	0.295	0.225
0.199985	11.9991	0.46	0.08	-0.02	2319.8	-450.9	1420	1.1	-39.6	2.636	3.043	-14.98	20.91	0.2639	0.2616	-0.064	0.2687	7.9	1.06	472.7	2770.7	22.9229	0.54	0.56	0.1	0.23	0.25	0.31	0.33	0.23	0.22	0	199.42	0.194	0.31	0.23
0.206092	12.3655	0.51	0.08	-0.02	2420	-478.1	1465.9	1.2	-39.58	2.636	3.043	-14.52	20.93	0.2764	0.2724	-0.0679	0.2803	7.9	1.163	487.9	2898.1	22.9241	0.59	0.61	0.1	0.25	0.27	0.34	0.35	0.25	0.24	0	209.63	0.198	0.335	0.255
0.21211	12.7266	0.48	0.08	-0.02	2520.2	-501.1	1520.3	1.1	-39.57	2.635	3.041	-14.06	20.92	0.2884	0.2836	-0.0712	0.2919	8.2	1.095	506	3021.2	22.9252	0.56	0.58	0.1	0.24	0.26	0.32	0.34	0.24	0.23	0	189.5	0.199	0.32	0.24
0.218283	13.097	0.51	0.09	-0.01	2620.3	-524.6	1573.6	1.2	-39.57	2.634	3.041	-13.56	20.91	0.3005	0.2946	-0.0745	0.3035	8.1	1.163	523.7	3144.8	22.9262	0.6	0.61	0.1	0.26	0.27	0.34	0.35	0.25	0.24	0	193.63	0.2	0.345	0.255
0.224407	13.4644	0.54	0.09	-0.01	2720.3	-542.2	1638.6	1.2	-39.55	2.634	3.04	-13.06	20.92	0.3127	0.3057	-0.077	0.3151	8.3	1.232	545.3	3262.5	22.9271	0.63	0.64	0.11	0.27	0.28	0.36	0.37	0.27	0.25	0	197.47	0.199	0.36	0.27
0.230555	13.8333	0.57	0.1	-0.02	2820.4	-557.7	1707.8	1.3	-39.53	2.634	3.039	-12.54	20.91	0.325	0.3166	-0.0792	0.3267	8.2	1.3	568.3	3378.1	22.9278	0.67	0.69	0.12	0.29	0.31	0.39	0.4	0.28	0.27	0	201.08	0.198	0.385	0.285
0.233315	13.9989	0.54	0.1	-0.02	2865.2	-564.6	1738.8	1.2	-39.53	2.634	3.039	-12.29	20.92	0.3303	0.3216	-0.0802	0.3319	8.4	1.232	578.6	3429.9	22.9281	0.64	0.66	0.12	0.28	0.3	0.37	0.39	0.27	0.25	0	187.56	0.197	0.37	0.27
0.239618	14.3771	0.63	0.11	-0.01	2965.3	-574.8	1818.8	1.4	-39.51	2.634	3.039	-11.74	20.91	0.3422	0.3329	-0.0816	0.3435	8.4	1.437	605.2	3540.1	22.9285	0.74	0.75	0.12	0.32	0.33	0.42	0.44	0.31	0.3	0	211.36	0.194	0.425	0.315
0.246012	14.7607	0.61	0.12	-0.02	3065.3	-579.1	1910.4	1.4	-39.5	2.634	3.037	-11.15	20.92	0.3541	0.3442	-0.0822	0.3551	8.6	1.403	635.7	3644.3	22.9287	0.73	0.75	0.14	0.32	0.34	0.42	0.44	0.31	0.29	0	199.66	0.189	0.425	0.305
0.252575	15.1545	0.64	0.13	-0.01	3165.6	-581.7	2005.4	1.5	-39.49	2.634	3.037	-10.54	20.92	0.3662	0.3553	-0.0826	0.3667	8.6	1.472	667.4	3747.3	22.9289	0.78	0.79	0.15	0.35	0.36	0.46	0.47	0.32	0.3	0	202.86	0.184	0.455	0.32
0.259138	15.5483	0.69	0.14	-0.01	3265.9	-578.5	2112.3	1.6	-39.48	2.634	3.037	-9.91	20.93	0.378	0.3668	-0.0822	0.3783	8.8	1.575	702.9	3844.4	22.9287	0.83	0.84	0.15	0.37	0.38	0.48	0.49	0.34	0.32	0	210.31	0.177	0.485	0.345
0.265897	15.9538	0.7	0.14	-0.02	3366.1	-566.8	2236	1.6	-39.46	2.634	3.037	-9.24	20.92	0.3899	0.3781	-0.0805	0.3899	8.6	1.609	744.2	3932.9	22.9282	0.85	0.86	0.16	0.38	0.39	0.49	0.51	0.35	0.33	0	208.5	0.168	0.495	0.35
0.266647	15.9988	0.72	0.14	-0.02	3377.2	-564.6	2251.4	1.6	-39.46	2.634	3.038	-9.17	20.93	0.3912	0.3793	-0.0802	0.3912	8.5	1.643	749.3	3941.8	22.9281	0.86	0.88	0.16	0.38	0.4	0.5	0.52	0.36	0.34	0	212.22	0.167	0.5	0.36
0.273698	16.4219	0.75	0.16	-0.01	3477.4	-543.8	2393.3	1.7	-39.44	2.634	3.037	-8.44	20.92	0.4029	0.3909	-0.0772	0.4028	8.8	1.712	796.6	4021.2	22.9271	0.9	0.92	0.17	0.41	0.42	0.53	0.54	0.37	0.35	0	214.76	0.156	0.53	0.375
0.280677	16.8406	0.78	0.17	-0.02	3577.7	-516.6	2548	1.8	-39.44	2.635	3.037	-7.72	20.93	0.4146	0.4024	-0.0734	0.4144	9.1	1.781	848.2	4094.2	22.9259	0.95	0.96	0.19	0.43	0.45	0.56	0.58	0.39	0.37	0	217.15	0.144	0.56	0.39
0.287762	17.2657	0.81	0.19	-0.01	3677.8	-485	2711	1.8	-39.43	2.636	3.037	-6.97	20.93	0.4265	0.4137	-0.0689	0.426	9.1	1.85	902.6	4162.9	22.9244	0.99	1	0.2	0.45	0.47	0.59	0.6	0.4	0.38	0	219.42	0.132	0.59	0.405
0.295092	17.7055	0.82	0.2	-0.01	3778	-438.6	2904	1.9	-39.41	2.637	3.037	-6.17	20.93	0.4382	0.4252	-0.0623	0.4376	9.2	1.885	966.9	4216.6	22.9223	1.02	1.03	0.21	0.47	0.49	0.61	0.62	0.41	0.39	0	217.65	0.116	0.61	0.41
0.299977	17.9986	0.84	0.21	-0.02	3843.1	-401.8	3042.5	1.9	-39.4	2.636	3.038	-5.63	20.93	0.4459	0.4325	-0.0571	0.4452	9	1.919	1013.2	4244.9	22.9206	1.05	1.06	0.22	0.49	0.5	0.63	0.64	0.42	0.39	0	217.91	0.105	0.63	0.42
0.307803	18.4682	0.87	0.23	-0.01	3943.2	-331.4	3282.9	2	-39.39	2.638	3.039	-4.75	20.93	0.4578	0.4439	-0.0471	0.4568	9.3	1.989	1093.5	4274.6	22.9174	1.09	1.11	0.24	0.52	0.53	0.66	0.67	0.43	0.41	0	220.06	0.084	0.66	0.435
0.315678	18.9407	0.88	0.25	-0.02	4043.2	-249.4	3546.5	2	-39.38	2.639	3.038	-3.85	20.93	0.4697	0.4551	-0.0354	0.4684	9.6	2.024	1181.5	4292.6	22.9136	1.13	1.15	0.27	0.54	0.56	0.69	0.71	0.44	0.42	0	218.47	0.062	0.69	0.44
0.32396	19.4376	0.93	0.28	-0.01	4143.6	-142.9	3859	2.1	-39.36	2.64	3.038	-2.91	20.93	0.4815	0.4666	-0.0203	0.48	9.9	2.128	1285.9	4286.6	22.9088	1.21	1.22	0.29	0.59	0.6	0.75	0.76	0.46	0.44	0	224.18	0.034	0.745	0.465
0.332118	19.9271	0.97	0.31	-0.02	4243.7	-15.4	4213	2.2	-39.35	2.641	3.039	-1.97	20.93	0.4932	0.4781	-0.0022	0.4916	9.9	2.232	1404.3	4259.1	22.9029	1.28	1.3	0.33	0.63	0.65	0.79	0.81	0.49	0.46	0	229.6	0.004	0.795	0.485
0.333308	19.9985	0.94	0.31	-0.01	4258	4.8	4267.5	2.1	-39.34	2.641	3.039	-1.83	20.94	0.4949	0.4798	0.0007	0.4932	9.9	2.164	1422.5	4253.2	22.902	1.25	1.27	0.32	0.62	0.64	0.78	0.79	0.47	0.45	0	221.88	0.001	0.78	0.47
0.341508	20.4905	0.98	0.35	0	4358.3	159.2	4675.2	2.2	-39.32	2.641	3.038	-0.89	20.93	0.5066	0.4912	0.0226	0.5049	10.2	2.234	1558.9	4199.2	22.8949	1.32	1.33	0.35	0.67	0.68	0.83	0.84	0.49	0.46	0	223.88	0.037	0.835	0.49
0.349758	20.9855	0.96	0.38	0	4458.3	326.5	5108.3	2.2	-39.32	2.643	3.038	0.08	20.93	0.5183	0.5028	0.0464	0.5165	10.6	2.202	1703.8	4131.9	22.8873	1.34	1.35	0.38	0.7	0.7	0.86	0.86	0.48	0.45	0	215.77	0.073	0.86	0.48
0.358063	21.4838	1.04	0.43	-0.01	4558.6	530	5613.4	2.4	-39.3	2.644	3.038	1.05	20.93	0.5301	0.5142	0.0753	0.5281	10.8	2.375	1872.8	4028.6	22.8779	1.46	1.48	0.44	0.77	0.78	0.94	0.96	0.52	0.49	0	227.69	0.116	0.945	0.52
0.366167	21.97	1.02	0.46	-0.01	4658.9	757.2	6165.7	2.3	-39.29	2.645	3.036	2	20.92	0.5418	0.5257	0.1075	0.5397	11.4	2.343	2057.8	3901.7	22.8675	1.49	1.5	0.48	0.8	0.82	0.97	0.99	0.51	0.48	0	219.89	0.163	0.975	0.51
0.366638	21.9983	1.02	0.47	-0.01	4664.9	770.4	6197.9	2.3	-39.29	2.645	3.036	2.06	20.93	0.5425	0.5264	0.1094	0.5404	11.3	2.343	2068.5	3894.5	22.8669	1.49	1.5	0.48	0.81	0.82	0.98	0.99	0.51	0.48	0	219.64	0.165	0.98	0.51
0.374522	22.4713	1.04	0.52	-0.01	4765.1	1017	6788.4	2.4	-39.28	2.646	3.035	2.99	20.92	0.5543	0.5378	0.1444	0.552	11.7	2.38	2266.4	3748	22.8556	1.56	1.57	0.53	0.87	0.88	1.04	1.05	0.52	0.49	0	218.52	0.213	1.04	0.52
0.382047	22.9228	1.06	0.58	-0.01	4865.3	1273	7397.4	2.4	-39.26	2.645	3.035	3.86	20.92	0.5658	0.5495	0.1808	0.5636	11.7	2.417	2470.5	3592.3	22.8439	1.64	1.65	0.59	0.93	0.94	1.11	1.12	0.53	0.5	0	217.5	0.262	1.11	0.53
0.389367	23.362	1.09	0.63	-0.01	4965.5	1542	8031.7	2.5	-39.25	2.647	3.032	4.68	20.92	0.5776	0.5609	0.219	0.5752	12.5	2.489	2683.1	3423.5	22.8316	1.72	1.73	0.64	1	1.01	1.18	1.19	0.54	0.51	0	219.51	0.311	1.175	0.545
0.396322	23.7793	1.11	0.69	-0.01	5065.7	1813.9	8671.8	2.5	-39.24	2.647	3.03	5.46	20.92	0.5891	0.5726	0.2576	0.5868	12.8	2.526	2897.8	3251.8	22.8192	1.8	1.81	0.7	1.06	1.07	1.25	1.26	0.55	0.52	0	218.53	0.358	1.245	0.555
0.39997	23.9982	1.09	0.73	-0.01	5117.9	1959.2	9012.5	2.5	-39.23	2.647	3.03	5.85	20.92	0.5951	0.5787	0.2782	0.5929	12.9	2.494	3012.1	3158.7	22.8126	1.82	1.83	0.73	1.09	1.1	1.27	1.28	0.55	0.52	0	213.6	0.383	1.275	0.545
0.406745	24.4047	1.11	0.79	-0.01	5218.2	2237.4	9664.5	2.5	-39.21	2.647	3.027	6.57	20.91	0.6064	0.5907	0.3177	0.6045	13.6	2.532	3231	2980.8	22.7998	1.9	1.91	0.8	1.16	1.17	1.35	1.36	0.56	0.52	0	212.79	0.429	1.345	0.555
0.413283	24.797	1.14	0.87	-0.01	5318.3	2501.9	10289.2	2.6	-39.2	2.649	3.026	7.23	20.91	0.6178	0.6024	0.3553	0.6161	14.1	2.604	3440.7	2816.4	22.7878	2.01	2.02	0.87	1.25	1.25	1.44	1.45	0.57	0.54	0	214.86	0.47	1.44	0.57
0.419733	25.184	1.17	0.91	-0.01	5418.4	2710	10801.7	2.6	-39.19	2.649	3.024	7.87	20.91	0.6293	0.6142	0.3848	0.6277	14.7	2.675	3612.8	2708.4	22.7782	2.09	2.1	0.92	1.3	1.32	1.5	1.51	0.59	0.55	0	216.71	0.5	1.5	0.585
0.426265	25.5759	1.21	0.98	-0.01	5518.7	2932.7	11343.2	2.7	-39.17	2.651	3.023	8.49	20.9	0.6402	0.6264	0.4165	0.6393	15.1	2.747	3794.7	2586	22.7681	2.19	2.2	0.99	1.38	1.4	1.58	1.6	0.6	0.57	0	218.6	0.5	1.585	0.605
0.432837	25.9702	1.21	1.04	-0.01	5619	3163.3	11900	2.7	-39.16	2.651	3.022	9.09	20.9	0.651	0.6389	0.4492	0.6509	15.5	2.75	3981.8	2455.7	22.7575	2.25	2.26	1.05	1.44	1.46	1.65	1.66	0.6	0.57	0	215.07	0.5	1.645	0.605
0.4333	25.998	1.22	1.05	-0.02	5626.6	3179.8	11940.4	2.7	-39.16	2.651	3.022	9.13	20.89	0.6519	0.6398	0.4516	0.6518	15.5	2.784	3995.4	2446.9	22.7568	2.27	2.29	1.06	1.45	1.47	1.66	1.67	0.61	0.58	0	217.46	0.5	1.66	0.61
0.440027	26.4016	1.26	1.12	-0.01	5726.9	3393	12462.5	2.8	-39.14	2.653	3.021	9.71	20.89	0.6626	0.6524	0.4818	0.6634	15.9	2.857	4170.9	2334	22.7471	2.37	2.38	1.12	1.53	1.54	1.74	1.75	0.63	0.59	0	219.28	0.5	1.745	0.63
0.44681	26.8086	1.44	1.17	-0.01	5827.1	3523.1	12819.8	3.2	-39.13	2.653	3.021	10.27	20.89	0.6736	0.6645	0.5003	0.675	16.1	3.268	4291.1	2304	22.7411	2.6	2.62	1.18	1.65	1.66	1.88	1.9	0.72	0.68	0	246.63	0.5	1.885	0.72
0.45931	27.5586	1.38	1.12	-0.01	5927.4	3516.9	12907.2	3.1	-39.12	2.659	3.027	11.46	20.89	0.6873	0.6741	0.4994	0.6866	16.3	3.13	4320.4	2410.5	22.7414	2.5	2.51	1.14	1.58	1.6	1.81	1.83	0.69	0.65	0	232.17	0.5	1.81	0.69
0.466632	27.9979	1.38	1.22	-0.02	6001.9	3712.1	13367.9	3.1	-39.11	2.662	3.028	12.09	20.9	0.6953	0.6833	0.5272	0.6953	16.8	3.135	4475.4	2289.8	22.7325	2.6	2.61	1.23	1.68	1.69	1.91	1.92	0.69	0.65	0	229.76	0.5	1.91	0.69
0.475117	28.507	1.38	1.32	-0.01	6102.2	3981.9	14001.6	3.1	-39.1	2.665	3.027	12.78	20.89	0.7058	0.696	0.5655	0.7069	17.5	3.141	4688.7	2120.3	22.7202	2.7	2.71	1.33	1.78	1.79	2.01	2.02	0.69	0.65	0	226.52	0.5	2.01	0.69
0.483	28.98	1.4	1.41	-0.01	6202.4	4225.1	14582.5	3.1	-39.08	2.667	3.026	13.36	20.89	0.7163	0.7088	0.6	0.7185	18.1	3.18	4884.2	1977.3	22.7091	2.81	2.82	1.42	1.87	1.89	2.11	2.12	0.7	0.66	0	225.74	0.5	2.11	0.7
0.49111	29.4666	1.46	1.49	-0.02	6302.6	4463.9	15154.3	3.2	-39.07	2.67	3.024	13.92	20.9	0.7271	0.7212	0.6339	0.7301	19.1	3.321	5076.8	1838.7	22.6982	2.96	2.97	1.51	1.98	2	2.23	2.24	0.73	0.69	0	232.13	0.5	2.225	0.73
0.499295	29.9577	1.5	1.58	-0.01	6402.6	4688	15696.8	3.3	-39.05	2.671	3.025	14.42	20.89	0.7381	0.7333	0.6657	0.7417	19.2	3.394	5259.5	1714.5	22.688	3.07	3.09	1.59	2.08	2.09	2.33	2.34	0.75	0.71	0	233.63	0.5	2.325	0.75
0.499962	29.9977	1.47	1.59	-0.01	6410.2	4705.4	15738.7	3.2	-39.05	2.67	3.024	14.46	20.89	0.739	0.7343	0.6682	0.7426	19.2	3.326	5273.7	1704.8	22.6872	3.05	3.06	1.6	2.08	2.08	2.32	2.33	0.73	0.69	0	228.71	0.5	2.32	0.735
0.508692	30.5215	1.54	1.67	-0.01	6510.4	4917	16256.4	3.4	-39.03	2.674	3.024	14.95	20.9	0.7504	0.7461	0.6983	0.7542	20	3.501	5448.2	1593.4	22.6775	3.21	3.22	1.68	2.18	2.19	2.44	2.45	0.77	0.73	0	237.12	0.5	2.44	0.77
0.518252	31.0951	1.61	1.73	0	6610.7	5093.8	16705.1	3.5	-39.02	2.676	3.025	15.44	20.9	0.7616	0.7581	0.7234	0.7658	20.4	3.641	5599.4	1516.9	22.6695	3.34	3.34	1.73	2.27	2.27	2.53	2.54	0.8	0.76	0	242.95	0.5	2.535	0.805
0.528708	31.7225	1.58	1.82	-0.01	6711.2	5294.3	17200.9	3.5	-39.01	2.68	3.026	15.91	20.9	0.773	0.77	0.7518	0.7774	21.1	3.578	5766.6	1416.9	22.6604	3.4	3.41	1.83	2.34	2.35	2.61	2.62	0.79	0.74	0	235.25	0.5	2.61	0.79
0.533293	31.9976	1.64	1.85	-0.01	6754	5376.2	17405	3.6	-39.01	2.681	3.026	16.09	20.91	0.7778	0.7751	0.7635	0.7824	21.2	3.716	5835.5	1377.8	22.6566	3.49	3.5	1.86	2.4	2.41	2.67	2.68	0.82	0.77	0	242.82	0.5	2.67	0.82
0.544758	32.6855	1.66	1.93	-0.01	6854.1	5558.7	17864.6	3.6	-38.99	2.684	3.028	16.53	20.91	0.7892	0.7869	0.7894	0.794	21.7	3.755	5990.5	1295.4	22.6483	3.59	3.6	1.94	2.49	2.5	2.76	2.77	0.83	0.78	0	241.86	0.5	2.76	0.83
0.557235	33.4341	1.71	2	-0.01	6954.3	5730.9	18303.7	3.7	-38.97	2.688	3.028	16.92	20.91	0.8002	0.7991	0.8138	0.8056	22.6	3.861	6138.7	1223.5	22.6405	3.71	3.72	2.02	2.57	2.58	2.86	2.87	0.85	0.8	0	245.2	0.5	2.855	0.855
0.566623	33.9974	1.75	2.05	-0.01	7022	5845.1	18596.2	3.8	-38.97	2.69	3.029	17.19	20.91	0.8077	0.8073	0.8301	0.8134	22.8	3.965	6237.4	1177	22.6353	3.8	3.81	2.06	2.63	2.65	2.93	2.94	0.88	0.83	0	249.49	0.5	2.925	0.875
0.58186	34.9116	1.81	2.12	-0.01	7122.1	6006.4	19013.5	4	-38.95	2.695	3.032	17.56	20.91	0.819	0.8192	0.853	0.825	23.4	4.106	6378.3	1115.7	22.6279	3.93	3.94	2.13	2.72	2.73	3.03	3.04	0.91	0.86	0	254.76	0.5	3.025	0.905
0.598522	35.9113	1.88	2.18	-0.01	7222.2	6155	19405.6	4.1	-38.94	2.7	3.033	17.89	20.9	0.8303	0.8311	0.8741	0.8366	24.2	4.246	6510.7	1067.2	22.6212	4.06	4.07	2.19	2.81	2.82	3.12	3.13	0.94	0.88	0	259.87	0.5	3.12	0.94
0.599955	35.9973	1.88	2.19	-0.01	7229.5	6166.6	19435.8	4.1	-38.94	2.7	3.034	17.92	20.91	0.8311	0.8319	0.8757	0.8375	24	4.246	6520.9	1062.8	22.6206	4.07	4.08	2.21	2.82	2.83	3.13	3.14	0.94	0.88	0	259.65	0.5	3.13	0.94
0.619165	37.1499	1.94	2.26	-0.01	7329.8	6305.5	19809	4.3	-38.93	2.705	3.037	18.25	20.89	0.8425	0.8438	0.8954	0.8491	24.6	4.386	6646.9	1024.3	22.6143	4.2	4.21	2.27	2.9	2.92	3.23	3.24	0.97	0.91	0	264.6	0.5	3.23	0.97
0.633285	37.9971	1.97	2.3	-0.01	7397	6393.1	20048.2	4.3	-38.92	2.708	3.039	18.44	20.89	0.8502	0.8517	0.9079	0.8569	25	4.456	6727.8	1003.9	22.6103	4.27	4.28	2.31	2.95	2.96	3.28	3.29	0.99	0.93	0	266.44	0.5	3.285	0.985
0.655598	39.3359	2.05	2.35	-0.01	7497.4	6513.7	20385	4.5	-38.91	2.711	3.041	18.74	20.9	0.8615	0.8636	0.925	0.8685	25.2	4.63	6841.6	983.7	22.6048	4.4	4.41	2.36	3.03	3.04	3.37	3.38	1.02	0.97	0	273.18	0.5	3.375	1.025
0.666617	39.997	2.06	2.38	-0.01	7542.4	6566.3	20533.2	4.5	-38.91	2.714	3.043	18.86	20.9	0.8667	0.8688	0.9325	0.8737	25.5	4.665	6891.7	976	22.6024	4.44	4.45	2.39	3.07	3.08	3.41	3.42	1.03	0.97	0	273.67	0.5	3.41	1.03
0.699947	41.9968	2.1	2.44	-0.01	7636.1	6721.2	20931.1	4.6	-38.89	2.72	3.049	19.2	20.89	0.877	0.8802	0.9545	0.8846	25.7	4.737	7026.2	914.9	22.5954	4.54	4.55	2.46	3.14	3.15	3.49	3.5	1.05	0.99	0	274.55	0.5	3.49	1.05
0.733278	43.9967	2.08	2.44	-0.01	7676.9	6797.1	21120.9	4.6	-38.88	2.726	3.055	19.25	20.9	0.8816	0.8851	0.9653	0.8893	25.7	4.703	7090.4	879.7	22.5919	4.53	4.54	2.46	3.14	3.15	3.48	3.5	1.04	0.98	0	271.17	0.5	3.485	1.04
0.766608	45.9965	2.1	2.42	-0.01	7693.8	6833.6	21209.4	4.6	-38.88	2.73	3.061	19.2	20.9	0.8834	0.8873	0.9704	0.8912	25.4	4.736	7120.3	860.2	22.5903	4.52	4.53	2.43	3.12	3.13	3.47	3.48	1.05	0.99	0	272.5	0.5	3.47	1.05
0.79994	47.9964	2.08	2.4	-0.01	7698.7	6849.2	21245.2	4.6	-38.88	2.732	3.066	19.1	20.91	0.8839	0.8878	0.9727	0.8918	24.9	4.701	7132.4	849.5	22.5896	4.48	4.49	2.41	3.1	3.1	3.44	3.45	1.04	0.98	0	270.3	0.5	3.44	1.04
0.83327	49.9962	2.08	2.36	-0.02	7699.1	6853.3	21253.5	4.6	-38.88	2.733	3.071	18.98	20.91	0.8839	0.8879	0.9732	0.8919	24.3	4.698	7135.2	845.8	22.5894	4.44	4.45	2.37	3.05	3.07	3.4	3.41	1.04	0.98	0	270.14	0.5	3.4	1.04
0.866602	51.9961	2.06	2.33	-0.01	7697	6853.8	21252.5	4.5	-38.87	2.733	3.074	18.86	20.92	0.8839	0.8874	0.9733	0.8916	23.7	4.662	7134.9	843.2	22.5894	4.39	4.4	2.34	3.02	3.02	3.36	3.37	1.03	0.97	0	268.16	0.5	3.36	1.03
0.899932	53.9959	2.08	2.3	-0.01	7694.2	6852.3	21246.7	4.6	-38.87	2.733	3.078	18.74	20.92	0.884	0.8867	0.9731	0.8913	22.9	4.695	7132.9	842	22.5894	4.38	4.39	2.31	2.99	3	3.34	3.35	1.04	0.98	0	270.12	0.5	3.34	1.04
0.933263	55.9958	2.11	2.27	-0.01	7690.8	6847.2	21233.4	4.6	-38.87	2.733	3.081	18.62	20.93	0.8839	0.8861	0.9724	0.8909	22.4	4.762	7128.4	843.6	22.5897	4.38	4.39	2.28	2.97	2.98	3.33	3.33	1.05	0.99	0	274.07	0.5	3.325	1.055
0.966593	57.9956	2.06	2.24	-0.01	7687.4	6841.6	21219.1	4.5	-38.88	2.734	3.083	18.51	20.91	0.8838	0.8853	0.9716	0.8905	22.3	4.658	7123.6	845.8	22.5899	4.31	4.32	2.26	2.93	2.94	3.28	3.29	1.03	0.97	0	268.22	0.5	3.275	1.03
0.999923	59.9954	2.03	2.22	-0.01	7683.7	6836.6	21205.4	4.5	-38.88	2.733	3.086	18.42	20.9	0.8837	0.8845	0.9709	0.8901	21.5	4.588	7118.9	847.1	22.5901	4.25	4.26	2.23	2.89	2.9	3.23	3.24	1.02	0.96	0	264.33	0.5	3.235	1.015
1.03326	61.9953	2.05	2.19	-0.01	7680.6	6832	21193.4	4.5	-38.88	2.734	3.088	18.33	20.9	0.8836	0.884	0.9702	0.8897	21.3	4.621	7114.9	848.6	22.5903	4.24	4.25	2.2	2.88	2.88	3.22	3.22	1.02	0.96	0	266.32	0.5	3.215	1.025
1.06659	63.9951	2.01	2.18	-0.01	7678.2	6827	21181.1	4.4	-38.88	2.733	3.089	18.25	20.9	0.8834	0.8836	0.9695	0.8894	20.9	4.552	7110.7	851.3	22.5906	4.19	4.2	2.19	2.85	2.86	3.18	3.19	1.01	0.95	0	262.41	0.5	3.185	1.005
1.09992	65.995	2.03	2.16	-0.01	7675.2	6821.9	21168.1	4.5	-38.89	2.733	3.09	18.18	20.89	0.8833	0.883	0.9688	0.8891	20.6	4.585	7106.3	853.3	22.5908	4.19	4.2	2.17	2.83	2.85	3.17	3.18	1.01	0.96	0	264.42	0.5	3.175	1.015
1.13325	67.9948	2.03	2.13	-0.01	7672.8	6818.9	21159.8	4.5	-38.9	2.735	3.093	18.12	20.86	0.8832	0.8825	0.9683	0.8888	20.6	4.583	7103.5	853.9	22.5909	4.16	4.17	2.15	2.81	2.82	3.15	3.16	1.01	0.96	0	264.42	0.5	3.145	1.015
1.16658	69.9947	2.06	2.12	-0.01	7670.1	6815.8	21151.1	4.5	-38.89	2.734	3.094	18.07	20.87	0.8831	0.8821	0.9679	0.8885	20.3	4.651	7100.6	854.3	22.5911	4.18	4.2	2.14	2.81	2.82	3.15	3.17	1.03	0.97	0	268.41	0.5	3.15	1.03
1.19991	71.9945	2.01	2.11	-0.01	7669.8	6812.8	21144.8	4.4	-38.9	2.734	3.095	18.02	20.86	0.8831	0.882	0.9675	0.8885	20	4.548	7098.5	857	22.5912	4.12	4.14	2.12	2.78	2.79	3.12	3.13	1.01	0.95	0	262.48	0.5	3.115	1.005
1.23324	73.9944	2.03	2.11	-0.02	7667.7	6811.3	21139.9	4.5	-38.9	2.735	3.097	17.98	20.86	0.8829	0.8817	0.9673	0.8882	19.9	4.582	7096.8	856.5	22.5913	4.13	4.15	2.12	2.78	2.8	3.12	3.14	1.01	0.96	0	264.5	0.5	3.12	1.015
1.26657	75.9942	2.03	2.09	0	7665.7	6808.3	21131.9	4.5	-38.89	2.736	3.097	17.93	20.87	0.8828	0.8814	0.9668	0.888	20.1	4.581	7094.1	857.5	22.5914	4.12	4.12	2.1	2.77	2.77	3.11	3.11	1.01	0.96	0	264.52	0.5	3.105	1.015
1.2999	77.9941	2.04	2.08	-0.01	7664.7	6805.7	21125.9	4.5	-38.89	2.736	3.099	17.89	20.87	0.8827	0.8812	0.9665	0.8879	19.7	4.615	7092.1	859	22.5915	4.13	4.14	2.09	2.76	2.78	3.1	3.12	1.02	0.96	0	266.49	0.5	3.105	1.02
1.33323	79.9939	2.01	2.07	-0.01	7662.7	6803.2	21118.9	4.4	-38.9	2.736	3.101	17.85	20.89	0.8825	0.8809	0.9661	0.8876	19.3	4.546	7089.7	859.5	22.5917	4.09	4.09	2.08	2.74	2.75	3.08	3.09	1.01	0.95	0	262.6	0.5	3.08	1.005
1.34641	80.7845	2	2.07	-0.01	7662.7	6802.2	21116.9	4.4	-38.89	2.737	3.101	17.84	20.87	0.8825	0.8809	0.966	0.8876	19.6	4.512	7089	860.5	22.5917	4.07	4.07	2.08	2.73	2.74	3.07	3.08	1	0.94	0	260.61	0.5	3.07	1
1.37973	82.7839	2.01	2.07	-0.02	7661.7	6801.2	21113.9	4.4	-38.89	2.738	3.101	17.8	20.89	0.8825	0.8807	0.9658	0.8875	19.7	4.546	7088	860.5	22.5917	4.08	4.1	2.09	2.74	2.76	3.07	3.09	1.01	0.95	0	262.61	0.5	3.075	1.005
1.41306	84.7837	2.03	2.06	-0.01	7660.7	6799.7	21109.9	4.5	-38.9	2.738	3.103	17.77	20.87	0.8825	0.8805	0.9656	0.8874	19.4	4.579	7086.7	861	22.5918	4.09	4.1	2.07	2.73	2.75	3.07	3.09	1.01	0.96	0	264.59	0.5	3.075	1.015
1.44639	86.7835	2	2.05	-0.02	7659.7	6798.6	21106.9	4.4	-38.9	2.739	3.104	17.75	20.88	0.8824	0.8803	0.9655	0.8873	19.4	4.51	7085.6	861	22.5919	4.04	4.06	2.06	2.71	2.73	3.04	3.06	1	0.94	0	260.64	0.5	3.045	1
1.47972	88.7834	1.98	2.05	-0.01	7658	6798.1	21104.3	4.4	-38.9	2.739	3.105	17.73	20.89	0.8822	0.8801	0.9654	0.8871	19.1	4.476	7084.8	859.9	22.5919	4.03	4.04	2.06	2.71	2.72	3.04	3.05	0.99	0.93	0	258.73	0.5	3.04	0.99
1.51305	90.7832	2.03	2.05	-0.01	7657.6	6797.1	21102	4.5	-38.9	2.74	3.105	17.71	20.89	0.8822	0.88	0.9653	0.8871	19.3	4.578	7084	860.5	22.5919	4.07	4.08	2.06	2.72	2.73	3.06	3.07	1.01	0.96	0	264.64	0.5	3.06	1.015
1.54639	92.7831	2.03	2.04	-0.01	7658	6796.6	21101.3	4.5	-38.89	2.74	3.107	17.69	20.89	0.8822	0.8801	0.9652	0.8871	19.2	4.578	7083.7	861.4	22.592	4.06	4.07	2.04	2.71	2.72	3.05	3.06	1.01	0.96	0	264.6	0.5	3.05	1.015
1.57971	94.7829	2.03	2.03	-0.01	7657	6796.1	21099.3	4.5	-38.9	2.74	3.107	17.68	20.88	0.8822	0.8799	0.9651	0.887	19.2	4.578	7083.1	860.9	22.592	4.06	4.07	2.04	2.71	2.72	3.04	3.06	1.01	0.96	0	264.62	0.5	3.045	1.015
1.61305	96.7828	2	2.03	-0.01	7656.6	6796.6	21100	4.4	-38.9	2.74	3.108	17.67	20.87	0.8822	0.8798	0.9652	0.8869	18.9	4.509	7083.3	860	22.592	4.03	4.04	2.04	2.7	2.71	3.03	3.04	1	0.94	0	260.7	0.5	3.03	1
1.64638	98.7826	2	2.03	-0.01	7655.6	6797.1	21100	4.4	-38.9	2.742	3.109	17.66	20.87	0.8822	0.8796	0.9653	0.8868	19.1	4.509	7083.3	858.5	22.5919	4.03	4.04	2.04	2.7	2.71	3.03	3.04	1	0.94	0	260.73	0.5	3.03	1
1.6797	100.782	2	2.02	-0.02	7655.6	6797.1	21100	4.4	-38.91	2.741	3.108	17.66	20.86	0.8821	0.8797	0.9653	0.8868	19.1	4.509	7083.3	858.5	22.5919	4.02	4.03	2.04	2.69	2.7	3.02	3.04	1	0.94	0	260.7	0.5	3.02	1
1.71303	102.782	2.01	2.02	-0.01	7657	6798.1	21103.3	4.4	-38.91	2.742	3.109	17.65	20.84	0.8822	0.8799	0.9654	0.887	19	4.543	7084.4	858.8	22.5919	4.03	4.05	2.03	2.69	2.71	3.03	3.04	1.01	0.95	0	262.62	0.5	3.025	1.005
1.74637	104.782	2	2.02	-0.02	7656.3	6799.1	21104.6	4.4	-38.9	2.741	3.109	17.65	20.86	0.8822	0.8798	0.9655	0.8869	18.8	4.509	7084.9	857.1	22.5918	4.01	4.03	2.03	2.68	2.7	3.02	3.03	1	0.94	0	260.66	0.5	3.015	1
1.7797	106.782	2.01	2.02	-0.01	7657	6799.7	21106.3	4.4	-38.9	2.741	3.108	17.64	20.88	0.8822	0.8799	0.9656	0.887	19.1	4.543	7085.4	857.3	22.5918	4.03	4.04	2.03	2.69	2.7	3.02	3.04	1.01	0.95	0	262.61	0.5	3.025	1.005
1.81303	108.782	2.01	2.02	-0.01	7656.6	6800.2	21106.9	4.4	-38.9	2.74	3.108	17.63	20.88	0.8822	0.8798	0.9657	0.8869	18.9	4.543	7085.6	856.5	22.5918	4.03	4.04	2.03	2.69	2.7	3.02	3.03	1.01	0.95	0	262.62	0.5	3.025	1.005
1.84637	110.782	2.03	2.01	-0.01	7657.6	6800.2	21107.9	4.5	-38.9	2.741	3.109	17.63	20.89	0.8823	0.8799	0.9657	0.8871	18.9	4.577	7086	857.5	22.5918	4.04	4.05	2.03	2.69	2.7	3.03	3.04	1.01	0.95	0	264.54	0.5	3.025	1.015
1.8797	112.782	1.98	2.01	-0.01	7656.3	6801.2	21108.6	4.4	-38.9	2.74	3.107	17.63	20.86	0.8821	0.8798	0.9658	0.8869	19.1	4.474	7086.2	855.1	22.5917	3.99	4.01	2.03	2.67	2.69	3	3.02	0.99	0.93	0	258.68	0.5	3	0.99
1.91302	114.781	2.01	2.01	-0.01	7656.3	6801.7	21109.6	4.4	-38.9	2.74	3.109	17.62	20.85	0.8822	0.8798	0.9659	0.8869	18.8	4.542	7086.6	854.6	22.5917	4.02	4.03	2.02	2.68	2.69	3.02	3.03	1.01	0.95	0	262.62	0.5	3.015	1.005
1.94635	116.781	2.01	2.01	-0.01	7656.6	6802.7	21111.9	4.4	-38.9	2.74	3.108	17.62	20.87	0.8822	0.8798	0.966	0.8869	18.9	4.542	7087.3	853.9	22.5917	4.02	4.04	2.03	2.68	2.7	3.02	3.03	1.01	0.95	0	262.61	0.5	3.015	1.005
1.97968	118.781	2.03	2	-0.01	7655.3	6804.2	21113.6	4.5	-38.9	2.74	3.108	17.62	20.86	0.8821	0.8796	0.9663	0.8868	18.9	4.576	7087.9	851.1	22.5916	4.03	4.04	2.02	2.68	2.69	3.02	3.03	1.01	0.95	0	264.59	0.5	3.015	1.015
2.01302	120.781	2.01	2.01	-0.01	7657	6805.7	21118.2	4.4	-38.91	2.741	3.108	17.63	20.84	0.8822	0.8798	0.9665	0.887	19.1	4.542	7089.5	851.2	22.5915	4.02	4.03	2.02	2.68	2.69	3.01	3.03	1.01	0.95	0	262.58	0.5	3.015	1.005
2.04635	122.781	2.01	2	-0.02	7656.6	6807.2	21120.9	4.4	-38.91	2.74	3.109	17.63	20.83	0.8822	0.8798	0.9667	0.8869	18.8	4.542	7090.4	849.4	22.5915	4.01	4.03	2.02	2.67	2.69	3	3.02	1.01	0.95	0	262.56	0.5	3.005	1.005
2.07968	124.781	2	2	-0.02	7657	6808.3	21123.3	4.4	-38.91	2.74	3.107	17.63	20.84	0.8822	0.8799	0.9668	0.887	19.1	4.508	7091.2	848.7	22.5914	4	4.02	2.02	2.67	2.69	3	3.02	1	0.94	0	260.6	0.5	3	1
2.11302	126.781	1.98	2.01	-0.01	7657.6	6809.8	21126.9	4.4	-38.9	2.74	3.107	17.63	20.85	0.8822	0.88	0.9671	0.8871	19	4.474	7092.4	847.9	22.5914	3.99	4	2.02	2.67	2.68	3	3.01	0.99	0.93	0	258.62	0.5	3	0.99
2.14633	128.78	2.01	2.01	-0.01	7657.3	6810.3	21127.5	4.4	-38.9	2.74	3.107	17.63	20.85	0.8822	0.8799	0.9671	0.887	19	4.542	7092.6	847	22.5913	4.02	4.03	2.02	2.68	2.69	3.01	3.03	1.01	0.95	0	262.57	0.5	3.015	1.005
2.17967	130.78	2	2	-0.02	7656.6	6811.8	21129.9	4.4	-38.91	2.74	3.107	17.63	20.85	0.8822	0.8798	0.9673	0.8869	18.9	4.508	7093.4	844.8	22.5913	4	4.02	2.02	2.67	2.69	3	3.02	1	0.94	0	260.61	0.5	3	1
2.213	132.78	1.97	2	-0.01	7657.3	6812.8	21132.5	4.3	-38.91	2.738	3.106	17.63	20.85	0.8822	0.8799	0.9675	0.887	18.9	4.44	7094.3	844.5	22.5912	3.97	3.98	2.02	2.66	2.67	2.99	3	0.98	0.93	0	256.65	0.5	2.985	0.985
2.24633	134.78	2	2	-0.01	7657.3	6814.3	21135.5	4.4	-38.91	2.738	3.105	17.64	20.85	0.8822	0.8799	0.9677	0.887	19	4.508	7095.3	843	22.5911	3.99	4	2.01	2.66	2.67	3	3.01	1	0.94	0	260.58	0.5	2.995	1
2.27967	136.78	2.01	2	-0.02	7658	6815.3	21138.2	4.4	-38.9	2.738	3.105	17.64	20.85	0.8823	0.88	0.9678	0.8871	19	4.542	7096.2	842.6	22.5911	4.01	4.03	2.02	2.67	2.69	3	3.02	1.01	0.95	0	262.52	0.5	3.005	1.005
2.313	138.78	2.01	2	-0.02	7658.3	6816.4	21140.5	4.4	-38.91	2.738	3.105	17.64	20.83	0.8822	0.8802	0.968	0.8871	19	4.542	7097	842	22.5911	4.01	4.03	2.02	2.67	2.69	3	3.02	1.01	0.95	0	262.51	0.5	3.005	1.005
2.34632	140.779	2.03	2	-0.02	7658	6817.9	21143.2	4.5	-38.91	2.738	3.105	17.64	20.83	0.8822	0.8801	0.9682	0.8871	19	4.576	7097.9	840.1	22.591	4.02	4.04	2.02	2.67	2.69	3.01	3.03	1.01	0.95	0	264.49	0.5	3.01	1.015
2.37965	142.779	2.03	1.99	-0.02	7658.7	6819.4	21146.8	4.5	-38.91	2.738	3.105	17.65	20.84	0.8822	0.8802	0.9684	0.8872	19	4.576	7099.2	839.3	22.5909	4.02	4.04	2.02	2.67	2.69	3.01	3.03	1.01	0.95	0	264.45	0.5	3.005	1.015
2.41298	144.779	2.01	2	-0.02	7659.4	6820.9	21150.5	4.4	-38.91	2.738	3.104	17.65	20.84	0.8822	0.8804	0.9686	0.8873	19.1	4.542	7100.4	838.5	22.5908	4.01	4.03	2.02	2.67	2.69	3.01	3.03	1.01	0.95	0	262.49	0.5	3.005	1.005
2.44632	146.779	2.01	2	-0.02	7659	6821.9	21152.2	4.4	-38.9	2.738	3.104	17.65	20.86	0.8823	0.8802	0.9688	0.8872	19.2	4.542	7100.9	837.1	22.5908	4.01	4.03	2.02	2.67	2.69	3.01	3.03	1.01	0.95	0	262.51	0.5	3.005	1.005
2.47965	148.779	2	2	-0.01	7659	6823.4	21155.2	4.4	-38.9	2.738	3.104	17.64	20.85	0.8822	0.8803	0.969	0.8872	19.1	4.508	7102	835.6	22.5907	3.99	4.01	2.01	2.66	2.68	3	3.01	1	0.94	0	260.52	0.5	2.995	1
2.51298	150.779	2.01	2	-0.02	7660.1	6823.9	21157.2	4.4	-38.91	2.738	3.103	17.65	20.85	0.8822	0.8806	0.9691	0.8873	19.4	4.542	7102.6	836.1	22.5907	4.01	4.03	2.02	2.67	2.69	3.01	3.03	1.01	0.95	0	262.47	0.5	3.005	1.005
2.54632	152.779	2	2	-0.01	7660.4	6824.4	21158.5	4.4	-38.9	2.738	3.103	17.65	20.87	0.8822	0.8806	0.9691	0.8874	19.2	4.508	7103.1	836	22.5907	3.99	4.01	2.01	2.66	2.68	3	3.01	1	0.94	0	260.48	0.5	2.995	1
2.57963	154.778	2	2	-0.02	7660.4	6826	21161.5	4.4	-38.91	2.738	3.103	17.65	20.85	0.8823	0.8806	0.9694	0.8874	19.4	4.508	7104.1	834.4	22.5906	4	4.02	2.02	2.67	2.69	3	3.02	1	0.94	0	260.49	0.5	3	1
2.61297	156.778	2	2	-0.02	7661.1	6828	21166.2	4.4	-38.91	2.738	3.103	17.66	20.81	0.8823	0.8807	0.9696	0.8875	19.4	4.508	7105.7	833.1	22.5905	3.99	4.01	2.02	2.66	2.68	3	3.01	1	0.94	0	260.46	0.5	2.995	1
2.6463	158.778	2	2	-0.02	7661.1	6829	21168.2	4.4	-38.92	2.738	3.104	17.67	20.81	0.8823	0.8807	0.9698	0.8875	19.1	4.508	7106.4	832.1	22.5905	3.99	4.01	2.02	2.66	2.68	3	3.01	1	0.94	0	260.46	0.5	2.995	1
2.67963	160.778	2.01	2	-0.02	7660.8	6831	21171.8	4.4	-38.91	2.74	3.103	17.68	20.81	0.8822	0.8807	0.9701	0.8874	19.7	4.542	7107.6	829.7	22.5904	4.01	4.03	2.02	2.67	2.69	3	3.03	1.01	0.95	0	262.44	0.5	3.005	1.005
2.71297	162.778	2.01	2	-0.02	7660.4	6833	21175.5	4.4	-38.91	2.738	3.104	17.68	20.81	0.8822	0.8806	0.9704	0.8874	19.1	4.542	7108.8	827.4	22.5903	4.01	4.03	2.02	2.67	2.69	3.01	3.03	1.01	0.95	0	262.46	0.5	3.005	1.005
2.7463	164.778	2.03	2	-0.02	7661.4	6834.1	21178.4	4.5	-38.91	2.738	3.104	17.68	20.83	0.8823	0.8808	0.9705	0.8875	19.1	4.576	7109.8	827.4	22.5903	4.02	4.04	2.02	2.67	2.69	3.01	3.03	1.01	0.95	0	264.38	0.5	3.01	1.015
2.77962	166.777	2	2	-0.01	7661.8	6834.1	21178.8	4.4	-38.92	2.738	3.103	17.68	20.82	0.8823	0.8809	0.9705	0.8875	19.4	4.508	7110	827.7	22.5903	4	4.01	2.02	2.67	2.68	3	3.01	1	0.94	0	260.45	0.5	3	1
2.81295	168.777	2.01	2	-0.01	7661.8	6835.6	21181.8	4.4	-38.91	2.739	3.104	17.68	20.82	0.8823	0.8809	0.9707	0.8875	19.4	4.542	7111	826.2	22.5902	4.01	4.02	2.01	2.67	2.68	3	3.02	1.01	0.95	0	262.4	0.5	3.005	1.005
2.84628	170.777	2.01	2	-0.02	7661.8	6836.6	21183.8	4.4	-38.91	2.738	3.103	17.68	20.84	0.8823	0.8809	0.9709	0.8875	19.5	4.542	7111.6	825.2	22.5901	4.01	4.03	2.02	2.67	2.69	3	3.02	1.01	0.95	0	262.4	0.5	3.005	1.005
2.87962	172.777	2	2	-0.02	7662.1	6837.6	21186.1	4.4	-38.92	2.739	3.104	17.69	20.8	0.8823	0.881	0.971	0.8876	19.4	4.508	7112.4	824.5	22.5901	3.99	4.01	2.02	2.66	2.68	3	3.01	1	0.94	0	260.42	0.5	2.995	1
2.91295	174.777	2	2	-0.02	7663.1	6839.6	21191.1	4.4	-38.93	2.739	3.105	17.7	20.77	0.8823	0.8812	0.9713	0.8877	19.3	4.508	7114.1	823.5	22.59	3.99	4.02	2.02	2.66	2.69	3	3.02	1	0.94	0	260.39	0.5	2.995	1
2.94628	176.777	2.01	1.99	-0.03	7663.8	6841.6	21195.8	4.4	-38.93	2.74	3.105	17.72	20.77	0.8824	0.8813	0.9716	0.8878	19.3	4.541	7115.7	822.2	22.5899	4	4.03	2.02	2.66	2.69	3	3.02	1.01	0.95	0	262.32	0.5	2.995	1.005
2.97962	178.777	2	2	-0.03	7664.5	6843.2	21199.5	4.4	-38.93	2.74	3.105	17.72	20.76	0.8823	0.8815	0.9718	0.8879	19.4	4.508	7116.9	821.4	22.5898	4	4.03	2.03	2.67	2.7	3	3.03	1	0.94	0	260.36	0.5	3	1
3.01293	180.776	2	2	-0.03	7664.8	6845.2	21203.8	4.4	-38.93	2.74	3.105	17.73	20.75	0.8824	0.8815	0.9721	0.8879	19.4	4.508	7118.4	819.6	22.5897	3.99	4.02	2.02	2.66	2.69	3	3.02	1	0.94	0	260.34	0.5	2.995	1
3.04627	182.776	1.98	2	-0.03	7665.5	6846.7	21207.5	4.4	-38.93	2.74	3.105	17.73	20.76	0.8824	0.8817	0.9723	0.888	19.6	4.474	7119.6	818.8	22.5897	3.98	4.01	2.03	2.66	2.69	2.99	3.02	0.99	0.93	0	258.36	0.5	2.99	0.99
3.0796	184.776	2.01	2	-0.03	7665.2	6847.2	21208.2	4.4	-38.92	2.741	3.105	17.74	20.78	0.8823	0.8817	0.9724	0.8879	19.7	4.542	7119.9	818	22.5897	4.01	4.04	2.03	2.67	2.7	3.01	3.03	1.01	0.95	0	262.31	0.5	3.005	1.005
3.11293	186.776	2.01	2	-0.02	7664.9	6848.7	21210.8	4.4	-38.92	2.74	3.104	17.73	20.78	0.8823	0.8816	0.9726	0.8879	19.7	4.542	7120.8	816.1	22.5896	4.01	4.04	2.02	2.67	2.69	3.01	3.03	1.01	0.95	0	262.32	0.5	3.005	1.005
3.14627	188.776	2.01	2	-0.02	7666.2	6848.7	21212.1	4.4	-38.92	2.741	3.105	17.74	20.78	0.8824	0.8818	0.9726	0.8881	19.7	4.542	7121.2	817.5	22.5896	4.01	4.03	2.02	2.67	2.69	3	3.03	1.01	0.95	0	262.26	0.5	3.005	1.005
3.1796	190.776	2	2	-0.03	7666.2	6850.2	21215.1	4.4	-38.93	2.742	3.104	17.74	20.76	0.8824	0.8818	0.9728	0.8881	20	4.508	7122.2	816	22.5895	3.99	4.02	2.02	2.66	2.69	3	3.02	1	0.94	0	260.29	0.5	2.995	1
3.21293	192.776	2	2	-0.03	7666.9	6851.3	21217.8	4.4	-38.93	2.741	3.105	17.75	20.75	0.8824	0.882	0.9729	0.8881	19.6	4.508	7123.1	815.6	22.5895	4	4.02	2.03	2.67	2.69	3	3.03	1	0.94	0	260.28	0.5	3	1
3.24625	194.775	2.01	2	-0.03	7666.6	6852.3	21219.4	4.4	-38.92	2.742	3.105	17.76	20.77	0.8823	0.882	0.9731	0.8881	19.7	4.542	7123.7	814.3	22.5894	4.01	4.04	2.03	2.67	2.7	3.01	3.03	1.01	0.95	0	262.26	0.5	3.005	1.005
3.27958	196.775	2.01	2	-0.02	7667.6	6853.3	21222.5	4.4	-38.92	2.741	3.105	17.75	20.78	0.8824	0.8822	0.9732	0.8882	19.7	4.542	7124.7	814.3	22.5894	4.01	4.03	2.02	2.67	2.69	3	3.03	1.01	0.95	0	262.21	0.5	3.005	1.005
3.31292	198.775	2	2	-0.02	7667.2	6854.8	21225.1	4.4	-38.93	2.742	3.105	17.74	20.79	0.8824	0.8821	0.9734	0.8882	19.9	4.508	7125.6	812.4	22.5893	4	4.02	2.02	2.67	2.69	3	3.02	1	0.94	0	260.27	0.5	3	1
3.34625	200.775	2.01	2	-0.02	7667.3	6854.8	21225.2	4.4	-38.92	2.741	3.105	17.74	20.8	0.8823	0.8822	0.9734	0.8882	19.6	4.542	7125.6	812.5	22.5893	4.01	4.04	2.02	2.67	2.69	3.01	3.03	1.01	0.95	0	262.24	0.5	3.005	1.005
3.37958	202.775	1.98	2	-0.02	7667.6	6854.8	21225.5	4.4	-38.92	2.741	3.105	17.74	20.81	0.8823	0.8822	0.9734	0.8882	19.6	4.474	7125.7	812.8	22.5893	3.98	4	2.02	2.66	2.68	2.99	3.01	0.99	0.93	0	258.28	0.5	2.99	0.99
3.41292	204.775	2.01	2	-0.02	7667.6	6855.3	21226.5	4.4	-38.92	2.741	3.105	17.74	20.8	0.8823	0.8822	0.9735	0.8882	19.6	4.542	7126.1	812.3	22.5893	4.01	4.03	2.02	2.67	2.69	3.01	3.03	1.01	0.95	0	262.23	0.5	3.005	1.005
3.44623	206.774	2.04	2	-0.03	7667.6	6856.3	21228.5	4.5	-38.92	2.742	3.105	17.74	20.8	0.8823	0.8822	0.9737	0.8882	19.7	4.61	7126.8	811.3	22.5892	4.04	4.06	2.02	2.68	2.7	3.02	3.04	1.02	0.96	0	266.15	0.5	3.02	1.02
3.47957	208.774	2	2	-0.02	7667.6	6857.8	21231.5	4.4	-38.92	2.742	3.106	17.75	20.79	0.8823	0.8822	0.9739	0.8882	19.8	4.508	7127.8	809.8	22.5892	3.99	4.02	2.02	2.66	2.69	3	3.02	1	0.94	0	260.25	0.5	2.995	1
3.5129	210.774	2.01	2	-0.02	7668.3	6858.3	21233.1	4.4	-38.92	2.741	3.105	17.74	20.8	0.8824	0.8823	0.9739	0.8883	19.6	4.542	7128.3	809.9	22.5891	4.01	4.03	2.02	2.67	2.69	3	3.03	1.01	0.95	0	262.19	0.5	3.005	1.005
3.54623	212.774	2.01	2	-0.02	7668.6	6858.8	21234.4	4.4	-38.92	2.742	3.106	17.74	20.79	0.8824	0.8824	0.974	0.8883	19.8	4.542	7128.8	809.8	22.5891	4.01	4.03	2.02	2.67	2.69	3	3.03	1.01	0.95	0	262.18	0.5	3.005	1.005
3.57957	214.774	2.04	1.99	-0.02	7668.3	6860.4	21237.1	4.5	-38.92	2.742	3.107	17.75	20.78	0.8824	0.8823	0.9742	0.8883	19.6	4.61	7129.7	807.9	22.5891	4.04	4.06	2.02	2.67	2.7	3.01	3.04	1.02	0.96	0	266.11	0.5	3.015	1.02
3.6129	216.774	2.03	2	-0.03	7668.3	6861.4	21239.1	4.5	-38.93	2.742	3.106	17.76	20.78	0.8824	0.8823	0.9744	0.8883	19.6	4.576	7130.3	806.9	22.589	4.02	4.05	2.02	2.67	2.7	3.01	3.04	1.01	0.95	0	264.16	0.5	3.01	1.015
3.64623	218.774	1.97	2	-0.02	7668.9	6863.4	21243.7	4.3	-38.92	2.742	3.107	17.76	20.79	0.8825	0.8824	0.9747	0.8884	19.5	4.439	7131.9	805.5	22.5889	3.96	3.99	2.02	2.65	2.68	2.98	3	0.98	0.93	0	256.27	0.5	2.98	0.985
3.67955	220.773	2.03	2	-0.02	7667.9	6864.4	21244.7	4.5	-38.92	2.742	3.107	17.75	20.79	0.8824	0.8822	0.9748	0.8883	19.5	4.576	7132.3	803.5	22.5889	4.02	4.05	2.02	2.67	2.7	3.01	3.03	1.01	0.95	0	264.17	0.5	3.01	1.015
3.71288	222.773	2.01	2	-0.02	7668.3	6864.9	21246.1	4.4	-38.92	2.743	3.107	17.76	20.78	0.8824	0.8823	0.9749	0.8883	19.8	4.542	7132.7	803.4	22.5888	4.01	4.03	2.02	2.67	2.69	3	3.03	1.01	0.95	0	262.2	0.5	3.005	1.005
3.74622	224.773	2.01	2	-0.03	7668.9	6865.9	21248.7	4.4	-38.92	2.742	3.107	17.76	20.8	0.8825	0.8824	0.975	0.8884	19.6	4.542	7133.6	803	22.5888	4.01	4.03	2.02	2.67	2.69	3	3.03	1.01	0.95	0	262.17	0.5	3.005	1.005
3.77955	226.773	2.01	2	-0.03	7669.6	6865.9	21249.4	4.4	-38.92	2.744	3.107	17.76	20.79	0.8825	0.8825	0.975	0.8885	19.9	4.542	7133.8	803.7	22.5888	4.01	4.03	2.02	2.67	2.69	3	3.03	1.01	0.95	0	262.15	0.5	3.005	1.005
3.81288	228.773	2.03	2	-0.02	7670	6868	21253.7	4.5	-38.93	2.743	3.106	17.76	20.78	0.8825	0.8826	0.9753	0.8885	19.9	4.576	7135.3	802	22.5887	4.02	4.04	2.02	2.67	2.69	3.01	3.03	1.01	0.95	0	264.11	0.5	3.01	1.015
3.84622	230.773	2.01	2	-0.03	7669.3	6868.5	21254.1	4.4	-38.93	2.742	3.107	17.76	20.78	0.8825	0.8825	0.9754	0.8884	19.5	4.542	7135.4	800.8	22.5887	4.01	4.03	2.02	2.67	2.69	3	3.03	1.01	0.95	0	262.16	0.5	3.005	1.005
3.87953	232.772	2.01	1.99	-0.03	7669.3	6870	21257	4.4	-38.92	2.743	3.107	17.77	20.78	0.8824	0.8825	0.9756	0.8884	19.8	4.541	7136.4	799.3	22.5886	4.01	4.03	2.02	2.66	2.69	3	3.02	1.01	0.95	0	262.15	0.5	3	1.005
3.91287	234.772	2.03	2	-0.02	7669.6	6871.5	21260.4	4.5	-38.92	2.743	3.107	17.77	20.78	0.8825	0.8825	0.9758	0.8885	19.7	4.576	7137.5	798.1	22.5885	4.02	4.05	2.02	2.67	2.7	3.01	3.03	1.01	0.95	0	264.12	0.5	3.01	1.015
3.9462	236.772	2.01	2	-0.03	7670	6872	21261.7	4.4	-38.92	2.743	3.107	17.78	20.78	0.8825	0.8826	0.9759	0.8885	19.7	4.542	7138	798	22.5885	4.01	4.04	2.03	2.67	2.7	3	3.03	1.01	0.95	0	262.14	0.5	3.005	1.005
3.97953	238.772	2	2	-0.03	7670	6873	21263.7	4.4	-38.92	2.743	3.107	17.78	20.79	0.8825	0.8826	0.976	0.8885	19.7	4.508	7138.7	797	22.5885	3.99	4.02	2.02	2.66	2.69	3	3.02	1	0.94	0	260.18	0.5	2.995	1
4.01287	240.772	2.01	2	-0.02	7670.7	6874	21266.4	4.4	-38.92	2.744	3.107	17.78	20.78	0.8825	0.8828	0.9762	0.8886	19.9	4.542	7139.6	796.6	22.5884	4.01	4.04	2.02	2.67	2.69	3.01	3.03	1.01	0.95	0	262.13	0.5	3.005	1.005
4.0462	242.772	1.98	2	-0.03	7671.4	6875.5	21270.1	4.4	-38.93	2.743	3.107	17.78	20.79	0.8825	0.8829	0.9764	0.8887	19.8	4.474	7140.8	795.8	22.5884	3.98	4.01	2.03	2.66	2.69	2.99	3.02	0.99	0.93	0	258.18	0.5	2.99	0.99
4.07953	244.772	2.01	1.99	-0.03	7671.4	6876	21271.1	4.4	-38.93	2.744	3.107	17.79	20.77	0.8825	0.8829	0.9765	0.8887	19.9	4.541	7141.2	795.3	22.5883	4.01	4.03	2.02	2.66	2.69	3	3.02	1.01	0.95	0	262.08	0.5	3	1.005
4.11285	246.771	2.01	2	-0.03	7672.4	6877.6	21275	4.4	-38.93	2.744	3.107	17.79	20.77	0.8825	0.8831	0.9767	0.8888	20.1	4.542	7142.5	794.8	22.5883	4.01	4.03	2.02	2.67	2.69	3	3.03	1.01	0.95	0	262.06	0.5	3.005	1.005
4.14618	248.771	2	2	-0.02	7671.7	6878.1	21275.4	4.4	-38.93	2.744	3.108	17.8	20.78	0.8825	0.883	0.9768	0.8887	19.7	4.508	7142.6	793.6	22.5882	3.99	4.02	2.02	2.66	2.69	3	3.02	1	0.94	0	260.12	0.5	2.995	1
4.17952	250.771	1.98	2	-0.03	7671.7	6879.1	21277.4	4.4	-38.92	2.744	3.107	17.8	20.78	0.8824	0.8831	0.9769	0.8887	19.8	4.474	7143.3	792.6	22.5882	3.98	4.01	2.03	2.66	2.69	2.99	3.02	0.99	0.93	0	258.17	0.5	2.99	0.99
4.21285	252.771	2.03	2	-0.02	7672.4	6880.6	21281	4.5	-38.92	2.744	3.107	17.8	20.77	0.8825	0.8831	0.9771	0.8888	19.9	4.576	7144.5	791.8	22.5881	4.03	4.05	2.02	2.68	2.7	3.02	3.04	1.01	0.95	0	264.05	0.5	3.015	1.015
4.24618	254.771	2	2	-0.03	7672.4	6881.1	21282	4.4	-38.93	2.744	3.107	17.81	20.77	0.8825	0.8832	0.9772	0.8888	20	4.508	7144.9	791.3	22.5881	4	4.02	2.03	2.67	2.69	3	3.03	1	0.94	0	260.11	0.5	3	1
4.27952	256.771	1.97	2	-0.02	7672.4	6882.1	21284.1	4.3	-38.93	2.744	3.107	17.81	20.77	0.8824	0.8833	0.9773	0.8888	20	4.439	7145.6	790.3	22.5881	3.96	3.99	2.02	2.65	2.68	2.98	3	0.98	0.93	0	256.17	0.5	2.98	0.985
4.31285	258.771	2	2	-0.02	7673.1	6883.6	21287.7	4.4	-38.93	2.745	3.108	17.81	20.76	0.8825	0.8833	0.9775	0.8889	20	4.508	7146.8	789.4	22.588	3.99	4.02	2.02	2.66	2.69	3	3.02	1	0.94	0	260.08	0.5	2.995	1
4.34617	260.77	2.01	2	-0.02	7673.7	6884.6	21290.3	4.4	-38.93	2.744	3.108	17.81	20.77	0.8826	0.8833	0.9777	0.8889	19.7	4.542	7147.7	789.1	22.588	4.01	4.04	2.02	2.67	2.69	3.01	3.03	1.01	0.95	0	262.04	0.5	3.005	1.005
4.3795	262.77	2	2	-0.02	7673.1	6885.2	21290.7	4.4	-38.92	2.745	3.107	17.81	20.78	0.8825	0.8833	0.9778	0.8889	20.1	4.508	7147.8	787.9	22.5879	3.99	4.02	2.02	2.66	2.69	3	3.02	1	0.94	0	260.08	0.5	2.995	1
4.41283	264.77	2.01	2	-0.02	7672.7	6886.2	21292.4	4.4	-38.92	2.744	3.107	17.81	20.78	0.8825	0.8833	0.9779	0.8888	20	4.542	7148.4	786.6	22.5879	4.01	4.03	2.02	2.67	2.69	3.01	3.03	1.01	0.95	0	262.07	0.5	3.005	1.005
4.44617	266.77	2	2	-0.02	7673.4	6886.7	21294	4.4	-38.93	2.744	3.107	17.81	20.77	0.8825	0.8834	0.978	0.8889	20	4.508	7148.9	786.8	22.5879	4	4.02	2.02	2.67	2.69	3	3.02	1	0.94	0	260.08	0.5	3	1
4.4795	268.77	2.03	2	-0.02	7673.4	6887.2	21295	4.5	-38.92	2.744	3.107	17.82	20.78	0.8825	0.8834	0.978	0.8889	20.1	4.576	7149.3	786.3	22.5878	4.03	4.05	2.02	2.68	2.7	3.02	3.04	1.01	0.96	0	264.01	0.5	3.015	1.015
4.51283	270.77	2.01	2	-0.02	7673.7	6888.7	21298.3	4.4	-38.92	2.744	3.107	17.81	20.78	0.8825	0.8834	0.9783	0.8889	20	4.542	7150.4	785.1	22.5878	4.01	4.04	2.02	2.67	2.69	3.01	3.03	1.01	0.95	0	262.04	0.5	3.005	1.005
4.54615	272.769	1.98	2	-0.02	7673.8	6888.7	21298.3	4.4	-38.92	2.744	3.107	17.81	20.79	0.8825	0.8835	0.9783	0.8889	19.8	4.474	7150.4	785.1	22.5878	3.98	4	2.02	2.66	2.68	2.99	3.01	0.99	0.93	0	258.09	0.5	2.99	0.99
4.57948	274.769	2.01	1.99	-0.02	7673.8	6889.2	21299.3	4.4	-38.92	2.744	3.107	17.81	20.79	0.8825	0.8835	0.9783	0.8889	19.8	4.541	7150.7	784.6	22.5877	4.01	4.03	2.02	2.66	2.69	3	3.02	1.01	0.95	0	262.01	0.5	3	1.005
4.61282	276.769	2	2	-0.02	7674.1	6889.7	21300.7	4.4	-38.92	2.744	3.107	17.81	20.79	0.8825	0.8835	0.9784	0.889	19.8	4.508	7151.2	784.4	22.5877	4	4.02	2.02	2.67	2.69	3	3.02	1	0.94	0	260.06	0.5	3	1
4.64615	278.769	2.01	2	-0.02	7673.8	6890.2	21301.4	4.4	-38.92	2.744	3.107	17.81	20.79	0.8825	0.8835	0.9785	0.8889	19.8	4.542	7151.4	783.6	22.5877	4.01	4.03	2.02	2.67	2.69	3	3.03	1.01	0.95	0	262.02	0.5	3.005	1.005
4.67948	280.769	2	2	-0.02	7674.1	6891.7	21304.7	4.4	-38.92	2.744	3.107	17.82	20.78	0.8825	0.8836	0.9787	0.889	19.9	4.508	7152.5	782.4	22.5876	3.99	4.01	2.02	2.66	2.68	3	3.01	1	0.94	0	260.05	0.5	2.995	1
4.71282	282.769	2.01	2	-0.02	7674.1	6891.7	21304.7	4.4	-38.92	2.744	3.108	17.81	20.79	0.8825	0.8836	0.9787	0.889	19.8	4.542	7152.5	782.4	22.5876	4.01	4.03	2.02	2.67	2.69	3	3.03	1.01	0.95	0	262.01	0.5	3.005	1.005
4.74615	284.769	1.98	2	-0.02	7674.8	6892.2	21306.3	4.4	-38.92	2.744	3.108	17.82	20.77	0.8825	0.8837	0.9788	0.889	19.8	4.474	7153.1	782.5	22.5876	3.98	4	2.02	2.66	2.68	2.99	3.01	0.99	0.93	0	258.06	0.5	2.99	0.99
4.77947	286.768	2.01	1.99	-0.02	7675.2	6892.7	21307.7	4.4	-38.93	2.745	3.107	17.83	20.75	0.8825	0.8838	0.9788	0.8891	20.1	4.541	7153.5	782.4	22.5876	4	4.02	2.01	2.66	2.68	3	3.02	1.01	0.95	0	261.95	0.5	2.995	1.005
4.8128	288.768	2.01	2	-0.02	7675.5	6894.3	21311	4.4	-38.93	2.745	3.109	17.83	20.75	0.8825	0.8838	0.9791	0.8891	19.8	4.542	7154.7	781.2	22.5875	4.01	4.03	2.02	2.67	2.69	3	3.03	1.01	0.95	0	261.97	0.5	3.005	1.005
4.84613	290.768	2.01	1.99	-0.03	7675.5	6895.3	21313	4.4	-38.93	2.744	3.108	17.84	20.75	0.8825	0.8838	0.9792	0.8891	19.8	4.541	7155.3	780.2	22.5875	4.01	4.03	2.02	2.66	2.69	3	3.02	1.01	0.95	0	261.95	0.5	3	1.005
4.87947	292.768	2	2	-0.03	7675.8	6896.8	21316.4	4.4	-38.93	2.746	3.108	17.85	20.75	0.8825	0.884	0.9794	0.8892	20.1	4.508	7156.5	779.1	22.5874	3.99	4.02	2.02	2.66	2.69	3	3.02	1	0.94	0	259.99	0.5	2.995	1
4.9128	294.768	2.01	2	-0.03	7676.5	6898.3	21320	4.4	-38.94	2.746	3.109	17.86	20.72	0.8825	0.8841	0.9796	0.8892	20	4.542	7157.7	778.2	22.5873	4.01	4.03	2.02	2.67	2.69	3	3.03	1.01	0.95	0	261.93	0.5	3.005	1.005
4.94613	296.768	2.01	1.99	-0.03	7677.2	6899.8	21323.7	4.4	-38.94	2.746	3.109	17.87	20.71	0.8825	0.8842	0.9798	0.8893	20	4.541	7158.9	777.4	22.5873	4.01	4.03	2.02	2.66	2.69	3	3.03	1.01	0.95	0	261.89	0.5	3	1.005
4.97945	298.767	1.98	2	-0.03	7677.9	6900.8	21326.3	4.4	-38.94	2.746	3.109	17.87	20.72	0.8826	0.8843	0.98	0.8894	20.2	4.474	7159.8	777	22.5872	3.98	4.01	2.03	2.66	2.69	2.99	3.02	0.99	0.93	0	257.96	0.5	2.99	0.99
5.01278	300.767	2	2	-0.03	7678.2	6902.4	21329.6	4.4	-38.94	2.746	3.109	17.87	20.73	0.8826	0.8844	0.9802	0.8894	20.2	4.508	7161	775.9	22.5871	3.99	4.02	2.02	2.66	2.69	3	3.02	1	0.94	0	259.91	0.5	2.995	1
5.04612	302.767	2.01	2	-0.03	7677.9	6902.4	21329.3	4.4	-38.94	2.746	3.109	17.87	20.73	0.8826	0.8843	0.9802	0.8894	19.9	4.542	7160.9	775.5	22.5871	4.01	4.04	2.03	2.67	2.7	3.01	3.03	1.01	0.95	0	261.9	0.5	3.005	1.005
5.07945	304.767	2.01	2	-0.03	7678.9	6903.4	21332.3	4.4	-38.93	2.746	3.108	17.87	20.72	0.8827	0.8845	0.9803	0.8895	20.3	4.542	7161.9	775.5	22.5871	4.01	4.04	2.03	2.67	2.7	3.01	3.03	1.01	0.95	0	261.87	0.5	3.005	1.005
5.11278	306.767	1.98	2	-0.03	7678.9	6903.9	21333.3	4.4	-38.93	2.746	3.108	17.87	20.72	0.8827	0.8845	0.9804	0.8895	20.3	4.474	7162.2	775	22.5871	3.98	4.01	2.03	2.66	2.69	2.99	3.02	0.99	0.93	0	257.93	0.5	2.99	0.99
5.14612	308.767	2.01	2	-0.03	7678.5	6905.4	21335.9	4.4	-38.94	2.746	3.109	17.88	20.74	0.8826	0.8845	0.9806	0.8895	20	4.542	7163.1	773.2	22.587	4.01	4.03	2.02	2.67	2.69	3	3.03	1.01	0.95	0	261.87	0.5	3.005	1.005
5.17945	310.767	1.98	2	-0.03	7678.5	6905.9	21336.9	4.4	-38.94	2.746	3.109	17.88	20.72	0.8826	0.8845	0.9807	0.8895	20.2	4.474	7163.4	772.7	22.587	3.98	4	2.02	2.66	2.68	2.99	3.01	0.99	0.93	0	257.94	0.5	2.99	0.99
5.21277	312.766	2	2	-0.03	7678.9	6906.9	21339.3	4.4	-38.95	2.746	3.11	17.89	20.68	0.8826	0.8845	0.9808	0.8895	19.9	4.508	7164.2	772	22.5869	3.99	4.02	2.03	2.66	2.69	3	3.03	1	0.94	0	259.89	0.5	2.995	1
5.2461	314.766	2.01	1.99	-0.03	7678.9	6908.4	21342.3	4.4	-38.95	2.747	3.11	17.91	20.68	0.8826	0.8845	0.9811	0.8895	20	4.541	7165.2	770.5	22.5869	4.01	4.04	2.03	2.66	2.7	3	3.03	1.01	0.95	0	261.84	0.5	3	1.005
5.27943	316.766	2	2	-0.03	7679.9	6909.9	21346.3	4.4	-38.94	2.746	3.109	17.91	20.68	0.8826	0.8848	0.9813	0.8896	20.2	4.508	7166.6	770	22.5868	3.99	4.03	2.03	2.66	2.7	3	3.03	1	0.94	0	259.86	0.5	2.995	1
5.31277	318.766	1.98	2	-0.03	7679.6	6911	21348	4.4	-38.95	2.747	3.109	17.91	20.7	0.8826	0.8847	0.9814	0.8896	20.3	4.474	7167.2	768.6	22.5868	3.98	4.01	2.03	2.66	2.69	2.99	3.02	0.99	0.93	0	257.92	0.5	2.99	0.99
5.3461	320.766	2	2	-0.03	7680.6	6911.5	21350	4.4	-38.94	2.748	3.109	17.91	20.71	0.8827	0.8849	0.9815	0.8897	20.5	4.508	7167.8	769.1	22.5867	4	4.03	2.04	2.67	2.7	3	3.04	1	0.94	0	259.85	0.5	3	1
5.37943	322.766	2.03	2	-0.03	7680.2	6912	21350.6	4.5	-38.94	2.747	3.109	17.91	20.71	0.8827	0.8848	0.9816	0.8897	20.3	4.576	7168.1	768.3	22.5867	4.03	4.05	2.03	2.67	2.7	3.01	3.04	1.01	0.96	0	263.78	0.5	3.015	1.015
5.41277	324.766	2.01	2	-0.03	7679.9	6913.5	21353.3	4.4	-38.94	2.746	3.109	17.91	20.72	0.8826	0.8848	0.9818	0.8896	20	4.542	7169	766.4	22.5866	4.01	4.04	2.03	2.67	2.7	3.01	3.04	1.01	0.95	0	261.84	0.5	3.005	1.005
5.44608	326.765	2	2	-0.03	7679.6	6913.5	21352.9	4.4	-38.95	2.747	3.11	17.91	20.7	0.8826	0.8847	0.9818	0.8896	20	4.508	7168.8	766.1	22.5866	3.99	4.02	2.03	2.66	2.69	3	3.03	1	0.94	0	259.87	0.5	2.995	1
5.47942	328.765	2.03	2	-0.03	7680.2	6914.5	21355.6	4.5	-38.94	2.748	3.11	17.91	20.7	0.8827	0.8848	0.9819	0.8897	20.2	4.576	7169.7	765.8	22.5866	4.03	4.06	2.03	2.67	2.71	3.01	3.05	1.01	0.96	0	263.78	0.5	3.015	1.015
5.51275	330.765	2	2	-0.03	7680.6	6915.5	21357.9	4.4	-38.94	2.747	3.109	17.91	20.72	0.8827	0.8849	0.9821	0.8897	20.3	4.508	7170.5	765.1	22.5865	4	4.03	2.03	2.67	2.7	3	3.03	1	0.94	0	259.85	0.5	3	1
5.54608	332.765	2	2	-0.03	7680.9	6915	21357.3	4.4	-38.94	2.748	3.109	17.91	20.72	0.8827	0.8849	0.982	0.8898	20.3	4.508	7170.3	765.9	22.5866	4	4.03	2.03	2.67	2.7	3	3.03	1	0.94	0	259.84	0.5	3	1
5.57942	334.765	2.01	2	-0.03	7679.9	6916	21358.2	4.4	-38.94	2.747	3.11	17.91	20.71	0.8826	0.8848	0.9821	0.8896	20	4.542	7170.6	763.9	22.5865	4.01	4.04	2.03	2.67	2.7	3	3.03	1.01	0.95	0	261.83	0.5	3.005	1.005
5.61275	336.765	2.01	2	-0.03	7680.3	6917	21360.6	4.4	-38.94	2.748	3.11	17.91	20.72	0.8826	0.8849	0.9823	0.8897	20.2	4.542	7171.4	763.3	22.5865	4.01	4.04	2.03	2.67	2.7	3	3.03	1.01	0.95	0	261.81	0.5	3.005	1.005
5.64607	338.764	1.97	2	-0.03	7680.9	6917.5	21362.2	4.3	-38.94	2.747	3.109	17.91	20.73	0.8827	0.8849	0.9824	0.8898	20.2	4.44	7172	763.4	22.5865	3.97	4	2.03	2.66	2.69	2.99	3.02	0.98	0.93	0	255.92	0.5	2.985	0.985
5.6794	340.764	1.98	2	-0.03	7680.6	6917.5	21361.9	4.4	-38.93	2.748	3.11	17.91	20.72	0.8826	0.8849	0.9824	0.8897	20.2	4.474	7171.9	763.1	22.5865	3.98	4.01	2.03	2.66	2.69	2.99	3.02	0.99	0.93	0	257.88	0.5	2.99	0.99
5.71273	342.764	2	2	-0.03	7681.6	6918.5	21364.9	4.4	-38.94	2.747	3.109	17.91	20.73	0.8827	0.8851	0.9825	0.8898	20.2	4.508	7172.9	763.1	22.5864	3.99	4.02	2.03	2.66	2.69	3	3.03	1	0.94	0	259.81	0.5	2.995	1
5.74607	344.764	2	2	-0.02	7681.3	6918.5	21364.6	4.4	-38.93	2.748	3.11	17.91	20.72	0.8826	0.8851	0.9825	0.8898	20.2	4.508	7172.8	762.8	22.5864	4	4.02	2.02	2.67	2.69	3	3.02	1	0.94	0	259.83	0.5	3	1
5.7794	346.764	1.98	2	-0.03	7681.3	6918.5	21364.6	4.4	-38.93	2.747	3.11	17.91	20.73	0.8826	0.8851	0.9825	0.8898	20	4.474	7172.8	762.8	22.5864	3.98	4.01	2.03	2.66	2.69	2.99	3.02	0.99	0.93	0	257.85	0.5	2.99	0.99
5.81273	348.764	2	1.99	-0.03	7681.3	6919.5	21366.5	4.4	-38.93	2.746	3.109	17.91	20.73	0.8827	0.885	0.9826	0.8898	20	4.507	7173.5	761.7	22.5864	3.99	4.02	2.02	2.66	2.69	2.99	3.02	1	0.94	0	259.8	0.5	2.99	1
5.84607	350.764	1.98	1.99	-0.03	7682	6920.6	21369.2	4.4	-38.94	2.746	3.109	17.91	20.72	0.8827	0.8852	0.9828	0.8899	20	4.473	7174.4	761.4	22.5863	3.98	4.01	2.03	2.65	2.69	2.98	3.02	0.99	0.93	0	257.82	0.5	2.985	0.99
5.87938	352.763	2	2	-0.03	7683.3	6921.1	21371.6	4.4	-38.93	2.748	3.109	17.92	20.71	0.8827	0.8855	0.9829	0.89	20.5	4.508	7175.2	762.3	22.5863	3.99	4.02	2.03	2.66	2.69	3	3.03	1	0.94	0	259.75	0.5	2.995	1
5.91272	354.763	2	2	-0.03	7682.6	6922.1	21372.9	4.4	-38.94	2.747	3.111	17.93	20.7	0.8828	0.8853	0.983	0.89	19.9	4.508	7175.6	760.6	22.5862	3.99	4.02	2.03	2.66	2.69	3	3.03	1	0.94	0	259.77	0.5	2.995	1
5.94605	356.763	1.98	2	-0.03	7683.3	6922.6	21374.5	4.4	-38.94	2.748	3.109	17.93	20.72	0.8828	0.8854	0.9831	0.89	20.3	4.474	7176.2	760.7	22.5862	3.98	4.01	2.03	2.66	2.69	2.99	3.02	0.99	0.93	0	257.79	0.5	2.99	0.99
5.97938	358.763	2	1.99	-0.03	7683	6923.1	21375.2	4.4	-38.94	2.747	3.111	17.93	20.72	0.8827	0.8854	0.9831	0.89	19.9	4.507	7176.4	759.9	22.5862	3.99	4.02	2.02	2.66	2.68	2.99	3.02	1	0.94	0	259.75	0.5	2.99	1
6.01272	360.763	2	2	-0.03	7683.7	6924.1	21377.9	4.4	-38.94	2.749	3.11	17.93	20.7	0.8828	0.8855	0.9833	0.8901	20.5	4.508	7177.3	759.6	22.5862	3.99	4.02	2.03	2.66	2.69	3	3.03	1	0.94	0	259.74	0.5	2.995	1
6.04605	362.763	2	2	-0.03	7683.3	6924.1	21377.6	4.4	-38.94	2.748	3.11	17.93	20.7	0.8828	0.8854	0.9833	0.89	20.3	4.508	7177.2	759.2	22.5862	3.99	4.02	2.03	2.66	2.69	3	3.03	1	0.94	0	259.75	0.5	2.995	1
6.07937	364.762	2	2	-0.03	7683.3	6925.1	21379.6	4.4	-38.94	2.748	3.11	17.93	20.71	0.8827	0.8855	0.9834	0.89	20.2	4.508	7177.9	758.2	22.5861	4	4.03	2.03	2.67	2.7	3	3.03	1	0.94	0	259.77	0.5	3	1
6.1127	366.762	2	2	-0.03	7683.7	6926.1	21381.9	4.4	-38.94	2.748	3.111	17.93	20.7	0.8828	0.8855	0.9836	0.8901	20.1	4.508	7178.6	757.5	22.5861	4	4.03	2.03	2.67	2.7	3	3.03	1	0.94	0	259.76	0.5	3	1
6.14603	368.762	2.01	2	-0.03	7684	6927.6	21385.2	4.4	-38.94	2.748	3.111	17.95	20.68	0.8828	0.8856	0.9838	0.8901	20.2	4.542	7179.8	756.4	22.586	4.01	4.04	2.03	2.67	2.7	3	3.03	1.01	0.95	0	261.69	0.5	3.005	1.005
6.17937	370.762	2.01	1.99	-0.03	7684.7	6928.7	21387.9	4.4	-38.95	2.749	3.111	17.96	20.66	0.8828	0.8857	0.9839	0.8902	20.2	4.541	7180.7	756	22.5859	4.01	4.04	2.03	2.66	2.7	3	3.03	1.01	0.95	0	261.65	0.5	3	1.005
6.2127	372.762	2	2	-0.03	7685.4	6930.7	21392.5	4.4	-38.95	2.75	3.11	17.97	20.67	0.8828	0.8859	0.9842	0.8903	20.6	4.508	7182.2	754.7	22.5859	3.99	4.03	2.03	2.66	2.7	3	3.03	1	0.94	0	259.68	0.5	2.995	1
6.24603	374.762	2	1.99	-0.03	7685.7	6930.7	21392.9	4.4	-38.96	2.749	3.11	17.97	20.67	0.8828	0.886	0.9842	0.8903	20.5	4.507	7182.4	755.1	22.5859	3.99	4.02	2.03	2.66	2.69	2.99	3.03	1	0.94	0	259.66	0.5	2.99	1
6.27937	376.762	2.01	2	-0.03	7685.4	6931.7	21394.6	4.4	-38.95	2.749	3.111	17.97	20.67	0.8827	0.886	0.9844	0.8903	20.4	4.542	7182.9	753.7	22.5858	4.01	4.04	2.03	2.67	2.7	3	3.04	1.01	0.95	0	261.65	0.5	3.005	1.005
6.31268	378.761	1.98	2	-0.03	7685.7	6932.7	21396.8	4.4	-38.94	2.748	3.11	17.97	20.69	0.8828	0.886	0.9845	0.8903	20.3	4.474	7183.7	753	22.5858	3.98	4.01	2.03	2.66	2.69	2.99	3.02	0.99	0.93	0	257.71	0.5	2.99	0.99
6.34602	380.761	2.01	2	-0.03	7686.4	6932.7	21397.5	4.4	-38.94	2.748	3.111	17.97	20.69	0.8828	0.8861	0.9845	0.8904	20.2	4.542	7183.9	753.7	22.5858	4.01	4.04	2.03	2.67	2.7	3	3.04	1.01	0.95	0	261.61	0.5	3.005	1.005
6.37935	382.761	1.98	2	-0.03	7686.1	6932.7	21397.2	4.4	-38.94	2.749	3.11	17.97	20.7	0.8828	0.8861	0.9845	0.8904	20.5	4.474	7183.8	753.4	22.5858	3.98	4.01	2.03	2.66	2.69	2.99	3.02	0.99	0.93	0	257.7	0.5	2.99	0.99
6.41268	384.761	2.03	2	-0.03	7686.7	6933.7	21399.9	4.5	-38.94	2.749	3.11	17.97	20.68	0.8828	0.8861	0.9847	0.8904	20.5	4.576	7184.7	753	22.5857	4.03	4.06	2.03	2.68	2.71	3.02	3.05	1.01	0.96	0	263.58	0.5	3.015	1.015
6.44602	386.761	2	1.99	-0.03	7686.4	6934.7	21401.5	4.4	-38.95	2.749	3.111	17.97	20.68	0.8828	0.8861	0.9848	0.8904	20.2	4.507	7185.3	751.7	22.5857	3.99	4.02	2.03	2.66	2.69	2.99	3.03	1	0.94	0	259.64	0.5	2.99	1
6.47935	388.761	1.98	1.99	-0.03	7686.4	6935.2	21402.5	4.4	-38.94	2.748	3.111	17.98	20.68	0.8828	0.8861	0.9849	0.8904	20.1	4.473	7185.6	751.2	22.5856	3.98	4.01	2.03	2.65	2.69	2.98	3.02	0.99	0.93	0	257.68	0.5	2.985	0.99
6.51267	390.76	2.01	2	-0.03	7686.1	6936.2	21404.1	4.4	-38.95	2.748	3.111	17.98	20.68	0.8828	0.886	0.985	0.8904	20.2	4.542	7186.2	749.8	22.5856	4.01	4.04	2.03	2.67	2.7	3	3.04	1.01	0.95	0	261.63	0.5	3.005	1.005
6.546	392.76	2	2	-0.03	7685.7	6936.7	21404.8	4.4	-38.94	2.749	3.111	17.98	20.68	0.8828	0.886	0.9851	0.8903	20.2	4.508	7186.4	749	22.5856	3.99	4.03	2.03	2.66	2.7	3	3.03	1	0.94	0	259.68	0.5	2.995	1
6.57933	394.76	2	2	-0.03	7686.7	6937.3	21406.8	4.4	-38.95	2.75	3.111	17.98	20.67	0.8828	0.8861	0.9852	0.8904	20.5	4.508	7187.1	749.5	22.5856	3.99	4.03	2.03	2.66	2.7	3	3.03	1	0.94	0	259.64	0.5	2.995	1
6.61267	396.76	2.01	2	-0.04	7686.8	6938.8	21409.9	4.4	-38.95	2.75	3.111	17.99	20.66	0.8828	0.8862	0.9854	0.8904	20.5	4.542	7188.1	748	22.5855	4.01	4.05	2.04	2.67	2.71	3	3.04	1.01	0.95	0	261.6	0.5	3.005	1.005
6.646	398.76	2.01	2	-0.04	7687.1	6939.8	21412.1	4.4	-38.95	2.75	3.113	18	20.65	0.8828	0.8862	0.9855	0.8905	20.1	4.542	7188.9	747.3	22.5854	4.01	4.05	2.04	2.67	2.71	3	3.04	1.01	0.95	0	261.59	0.5	3.005	1.005
6.67933	400.76	2.01	2	-0.03	7686.8	6940.3	21412.8	4.4	-38.95	2.75	3.111	17.99	20.68	0.8828	0.8862	0.9856	0.8904	20.5	4.542	7189.1	746.5	22.5854	4.01	4.04	2.03	2.67	2.7	3	3.04	1.01	0.95	0	261.61	0.5	3.005	1.005
6.71267	402.76	2	2	-0.03	7687.1	6941.3	21415.2	4.4	-38.95	2.749	3.111	18	20.67	0.8828	0.8862	0.9857	0.8905	20.2	4.508	7189.9	745.8	22.5854	3.99	4.03	2.03	2.66	2.7	3	3.03	1	0.94	0	259.63	0.5	2.995	1
6.74598	404.759	2	2	-0.04	7687.7	6941.8	21416.8	4.4	-38.94	2.749	3.112	18	20.68	0.8829	0.8863	0.9858	0.8905	20.1	4.508	7190.5	745.9	22.5854	4	4.04	2.04	2.67	2.71	3	3.04	1	0.94	0	259.63	0.5	3	1
6.77932	406.759	1.97	2	-0.03	7687.4	6941.8	21416.5	4.3	-38.95	2.749	3.111	18	20.68	0.8829	0.8862	0.9858	0.8905	20.2	4.439	7190.3	745.6	22.5854	3.96	4	2.03	2.65	2.69	2.98	3.02	0.98	0.93	0	255.7	0.5	2.98	0.985
6.81265	408.759	1.98	2	-0.03	7687.4	6942.8	21418.5	4.4	-38.95	2.75	3.112	18	20.67	0.8829	0.8862	0.9859	0.8905	20.3	4.474	7191	744.6	22.5853	3.98	4.01	2.03	2.66	2.69	2.99	3.02	0.99	0.93	0	257.68	0.5	2.99	0.99
6.82757	409.654	1.98	1.99	-0.04	7688.7	6943.3	21420.7	4.4	-38.95	2.75	3.112	18.01	20.66	0.8831	0.8864	0.986	0.8907	20.3	4.473	7191.8	745.4	22.5853	3.98	4.01	2.03	2.65	2.69	2.98	3.02	0.99	0.93	0	257.6	0.5	2.985	0.99
6.8609	411.654	1.98	2	-0.03	7688.4	6943.8	21421.4	4.4	-38.95	2.75	3.111	18.01	20.67	0.883	0.8864	0.9861	0.8906	20.5	4.474	7192	744.6	22.5853	3.98	4.01	2.03	2.66	2.69	2.99	3.02	0.99	0.93	0	257.63	0.5	2.99	0.99
6.89422	413.653	2	2	-0.03	7689.4	6943.8	21422.4	4.4	-38.95	2.749	3.111	18	20.68	0.8831	0.8865	0.9861	0.8907	20.2	4.508	7192.3	745.6	22.5853	4	4.03	2.03	2.66	2.7	3	3.03	1	0.94	0	259.56	0.5	3	1
6.92755	415.653	2	2	-0.03	7689.1	6944.3	21423.1	4.4	-38.94	2.75	3.112	18	20.68	0.8831	0.8865	0.9862	0.8907	20.3	4.508	7192.6	744.7	22.5852	4	4.03	2.03	2.66	2.7	3	3.03	1	0.94	0	259.57	0.5	3	1
6.96088	417.653	2	2	-0.03	7688.7	6945.9	21425.8	4.4	-38.94	2.749	3.111	18	20.7	0.8831	0.8864	0.9864	0.8907	20.2	4.508	7193.5	742.9	22.5852	4	4.02	2.03	2.66	2.69	3	3.03	1	0.94	0	259.58	0.5	3	1
6.99422	419.653	2.01	2	-0.03	7689.7	6945.3	21425.8	4.4	-38.94	2.748	3.111	18	20.7	0.8831	0.8865	0.9863	0.8908	20.1	4.542	7193.5	744.4	22.5852	4.01	4.04	2.03	2.67	2.7	3	3.03	1.01	0.95	0	261.51	0.5	3.005	1.005
7.02755	421.653	2	2	-0.03	7688.8	6945.9	21425.8	4.4	-38.94	2.75	3.111	18	20.7	0.883	0.8865	0.9864	0.8907	20.4	4.508	7193.5	742.9	22.5852	4	4.03	2.03	2.66	2.7	3	3.03	1	0.94	0	259.58	0.5	3	1
7.06088	423.653	2	2	-0.03	7688.4	6945.9	21425.5	4.4	-38.94	2.748	3.111	18	20.7	0.883	0.8864	0.9864	0.8906	20.1	4.508	7193.4	742.6	22.5852	4	4.02	2.03	2.66	2.69	3	3.03	1	0.94	0	259.59	0.5	3	1
7.09422	425.653	2	1.99	-0.03	7688.8	6945.9	21425.8	4.4	-38.94	2.749	3.112	18	20.7	0.883	0.8865	0.9864	0.8907	20.1	4.507	7193.5	742.9	22.5852	3.99	4.02	2.02	2.66	2.69	2.99	3.02	1	0.94	0	259.56	0.5	2.99	1
7.12753	427.652	1.98	1.99	-0.03	7689.1	6945.9	21426.1	4.4	-38.95	2.749	3.111	17.99	20.69	0.8831	0.8865	0.9864	0.8907	20.2	4.473	7193.6	743.2	22.5852	3.97	4	2.02	2.65	2.68	2.98	3.01	0.99	0.93	0	257.58	0.5	2.98	0.99
7.16087	429.652	1.98	1.99	-0.03	7689.1	6946.4	21427.1	4.4	-38.94	2.75	3.112	17.98	20.69	0.8831	0.8865	0.9864	0.8907	20.3	4.473	7193.9	742.7	22.5851	3.97	4	2.02	2.65	2.68	2.98	3.01	0.99	0.93	0	257.58	0.5	2.98	0.99
7.1942	431.652	2	1.99	-0.03	7688.4	6946.4	21426.5	4.4	-38.94	2.749	3.112	17.98	20.7	0.883	0.8864	0.9864	0.8906	20.1	4.507	7193.7	742.1	22.5851	3.99	4.02	2.02	2.66	2.69	2.99	3.02	1	0.94	0	259.58	0.5	2.99	1
7.22753	433.652	2.01	1.99	-0.03	7688.4	6945.9	21425.5	4.4	-38.94	2.75	3.113	17.98	20.69	0.883	0.8864	0.9864	0.8906	20.1	4.541	7193.4	742.6	22.5852	4.01	4.04	2.03	2.66	2.7	3	3.03	1.01	0.95	0	261.54	0.5	3	1.005
7.26087	435.652	1.98	1.99	-0.03	7688.4	6945.3	21424.4	4.4	-38.94	2.75	3.113	17.97	20.68	0.883	0.8864	0.9863	0.8906	20.1	4.473	7193	743.1	22.5852	3.98	4	2.02	2.65	2.68	2.98	3.01	0.99	0.93	0	257.61	0.5	2.985	0.99
7.2942	437.652	2	1.99	-0.03	7688.4	6945.9	21425.5	4.4	-38.95	2.75	3.112	17.96	20.69	0.883	0.8864	0.9864	0.8906	20.3	4.507	7193.4	742.6	22.5852	3.99	4.02	2.02	2.66	2.69	2.99	3.02	1	0.94	0	259.56	0.5	2.99	1
7.32752	439.651	2	1.99	-0.03	7688.7	6945.3	21424.8	4.4	-38.94	2.75	3.113	17.96	20.68	0.8831	0.8864	0.9863	0.8907	20.1	4.507	7193.1	743.4	22.5852	3.98	4.01	2.02	2.65	2.68	2.98	3.02	1	0.94	0	259.53	0.5	2.985	1
7.36085	441.651	2.03	1.98	-0.03	7688.1	6945.9	21425.1	4.5	-38.95	2.75	3.113	17.95	20.67	0.883	0.8863	0.9864	0.8906	20.2	4.575	7193.3	742.2	22.5852	4.01	4.04	2.01	2.66	2.69	2.99	3.03	1.01	0.95	0	263.47	0.5	2.995	1.015
7.39418	443.651	1.98	1.98	-0.03	7688.8	6945.9	21425.8	4.4	-38.94	2.749	3.112	17.94	20.68	0.883	0.8865	0.9864	0.8907	20.1	4.473	7193.5	742.9	22.5852	3.96	3.99	2.01	2.64	2.67	2.97	3	0.99	0.93	0	257.56	0.5	2.97	0.99
7.42752	445.651	2.01	1.98	-0.03	7689.1	6944.8	21424.1	4.4	-38.94	2.75	3.113	17.93	20.69	0.8831	0.8865	0.9862	0.8907	20.1	4.54	7192.9	744.2	22.5852	3.99	4.02	2.01	2.65	2.68	2.98	3.01	1.01	0.95	0	261.45	0.5	2.985	1.005
7.46085	447.651	1.98	1.98	-0.03	7689.4	6944.3	21423.4	4.4	-38.94	2.75	3.113	17.93	20.7	0.8831	0.8865	0.9862	0.8907	20	4.473	7192.7	745.1	22.5852	3.96	3.99	2.01	2.64	2.67	2.97	3	0.99	0.93	0	257.53	0.5	2.97	0.99
7.49418	449.651	2	1.98	-0.03	7688.8	6944.3	21422.8	4.4	-38.94	2.748	3.113	17.92	20.7	0.883	0.8865	0.9862	0.8907	19.8	4.506	7192.5	744.4	22.5852	3.97	4	2.01	2.64	2.67	2.97	3.01	1	0.94	0	259.5	0.5	2.975	1
7.52752	451.651	2	1.97	-0.03	7689.1	6943.8	21422.1	4.4	-38.94	2.75	3.113	17.91	20.7	0.8831	0.8865	0.9861	0.8907	20	4.506	7192.2	745.2	22.5853	3.97	4	2	2.64	2.67	2.97	3	1	0.94	0	259.48	0.5	2.97	1
7.56083	453.65	2.03	1.97	-0.03	7688.4	6942.8	21419.5	4.5	-38.94	2.749	3.113	17.9	20.68	0.883	0.8864	0.9859	0.8906	20	4.574	7191.3	745.6	22.5853	4	4.03	2	2.65	2.68	2.98	3.01	1.01	0.95	0	263.42	0.5	2.985	1.015
7.59417	455.65	2	1.97	-0.03	7689.1	6942.8	21420.2	4.4	-38.94	2.748	3.113	17.9	20.68	0.883	0.8865	0.9859	0.8907	19.7	4.506	7191.6	746.3	22.5853	3.96	4	2	2.63	2.67	2.96	3	1	0.94	0	259.46	0.5	2.965	1
7.6275	457.65	1.99	1.96	-0.03	7688.4	6941.3	21416.5	4.4	-38.95	2.75	3.115	17.89	20.67	0.883	0.8864	0.9857	0.8906	19.9	4.506	7190.3	747.1	22.5854	3.96	3.99	2	2.63	2.66	2.96	2.99	1	0.94	0	259.47	0.5	2.96	0.995
7.66083	459.65	2	1.97	-0.03	7688.4	6941.8	21417.5	4.4	-38.95	2.75	3.114	17.89	20.66	0.883	0.8864	0.9858	0.8906	19.9	4.506	7190.7	746.6	22.5854	3.96	4	2	2.63	2.67	2.96	3	1	0.94	0	259.48	0.5	2.965	1
7.69417	461.65	1.98	1.96	-0.03	7688.8	6941.8	21417.8	4.4	-38.95	2.75	3.115	17.88	20.66	0.883	0.8865	0.9858	0.8907	19.7	4.471	7190.8	747	22.5854	3.94	3.97	1.99	2.62	2.65	2.95	2.98	0.99	0.93	0	257.49	0.5	2.95	0.99
7.7275	463.65	2.01	1.96	-0.04	7688.8	6941.3	21416.8	4.4	-38.95	2.75	3.114	17.88	20.66	0.883	0.8865	0.9857	0.8907	20	4.539	7190.5	747.5	22.5854	3.97	4	2	2.63	2.67	2.96	3	1	0.95	0	261.4	0.5	2.965	1.005
7.76083	465.65	1.99	1.95	-0.03	7688.4	6941.3	21416.5	4.4	-38.95	2.75	3.115	17.88	20.66	0.883	0.8864	0.9857	0.8906	19.7	4.505	7190.3	747.1	22.5854	3.95	3.98	1.99	2.62	2.65	2.95	2.98	1	0.94	0	259.44	0.5	2.95	0.995
7.79415	467.649	1.98	1.96	-0.03	7688.8	6941.3	21416.8	4.4	-38.96	2.75	3.115	17.87	20.65	0.883	0.8865	0.9857	0.8907	19.9	4.471	7190.5	747.5	22.5854	3.94	3.97	1.99	2.62	2.65	2.95	2.98	0.99	0.93	0	257.48	0.5	2.95	0.99
7.82748	469.649	1.99	1.95	-0.03	7688.4	6940.8	21415.5	4.4	-38.95	2.751	3.115	17.87	20.65	0.883	0.8864	0.9857	0.8906	20	4.505	7190	747.6	22.5854	3.95	3.98	1.99	2.62	2.65	2.95	2.98	1	0.94	0	259.44	0.5	2.95	0.995
7.86082	471.649	2.01	1.95	-0.04	7688.1	6940.8	21415.1	4.4	-38.96	2.75	3.115	17.88	20.64	0.883	0.8863	0.9857	0.8906	19.6	4.539	7189.9	747.3	22.5854	3.96	4	1.99	2.62	2.66	2.96	3	1	0.95	0	261.41	0.5	2.955	1.005
7.89415	473.649	1.99	1.96	-0.03	7688.1	6940.8	21415.1	4.4	-38.95	2.75	3.115	17.87	20.66	0.8829	0.8864	0.9857	0.8906	19.8	4.506	7189.9	747.3	22.5854	3.96	3.99	2	2.63	2.66	2.96	2.99	1	0.94	0	259.48	0.5	2.96	0.995
7.92748	475.649	2.02	1.95	-0.03	7688.8	6941.3	21416.8	4.5	-38.95	2.75	3.115	17.87	20.67	0.883	0.8865	0.9857	0.8907	19.7	4.573	7190.5	747.5	22.5854	3.98	4.01	1.99	2.63	2.66	2.97	3	1.01	0.95	0	263.35	0.5	2.965	1.01
7.96082	477.649	1.98	1.96	-0.03	7688.4	6941.3	21416.5	4.4	-38.95	2.75	3.115	17.87	20.66	0.883	0.8864	0.9857	0.8906	19.7	4.471	7190.3	747.1	22.5854	3.94	3.97	1.99	2.62	2.65	2.95	2.98	0.99	0.93	0	257.49	0.5	2.95	0.99
7.99413	479.648	1.99	1.96	-0.03	7688.8	6942.3	21418.8	4.4	-38.96	2.75	3.115	17.87	20.66	0.883	0.8865	0.9859	0.8907	19.9	4.505	7191.1	746.4	22.5853	3.95	3.98	1.99	2.62	2.65	2.95	2.98	1	0.94	0	259.44	0.5	2.955	0.995
8.02747	481.648	2.01	1.95	-0.03	7688.4	6941.3	21416.5	4.4	-38.95	2.75	3.115	17.87	20.66	0.883	0.8864	0.9857	0.8906	19.7	4.539	7190.3	747.1	22.5854	3.96	4	1.99	2.62	2.66	2.96	2.99	1	0.95	0	261.4	0.5	2.955	1.005
8.0608	483.648	1.99	1.96	-0.03	7688.4	6941.8	21417.5	4.4	-38.95	2.75	3.115	17.87	20.67	0.883	0.8864	0.9858	0.8906	19.7	4.505	7190.7	746.6	22.5854	3.95	3.98	1.99	2.62	2.65	2.95	2.98	1	0.94	0	259.45	0.5	2.955	0.995
8.09413	485.648	1.99	1.96	-0.03	7689.1	6942.3	21419.2	4.4	-38.95	2.75	3.115	17.87	20.66	0.883	0.8865	0.9859	0.8907	19.7	4.505	7191.2	746.8	22.5853	3.95	3.99	1.99	2.62	2.66	2.95	2.99	1	0.94	0	259.43	0.5	2.955	0.995
8.12747	487.648	1.99	1.95	-0.03	7688.8	6941.8	21417.8	4.4	-38.95	2.75	3.115	17.87	20.67	0.883	0.8865	0.9858	0.8907	19.9	4.505	7190.8	747	22.5854	3.95	3.98	1.99	2.62	2.65	2.95	2.98	1	0.94	0	259.43	0.5	2.95	0.995
8.1608	489.648	2.02	1.96	-0.03	7689.1	6942.3	21419.1	4.5	-38.94	2.75	3.114	17.88	20.67	0.8831	0.8865	0.9859	0.8907	19.9	4.573	7191.2	746.8	22.5853	3.98	4.02	1.99	2.63	2.67	2.97	3	1.01	0.95	0	263.35	0.5	2.97	1.01
8.19413	491.648	1.99	1.96	-0.03	7688.8	6942.8	21419.8	4.4	-38.94	2.75	3.115	17.88	20.67	0.883	0.8865	0.9859	0.8907	19.9	4.505	7191.5	745.9	22.5853	3.95	3.99	1.99	2.62	2.66	2.95	2.99	1	0.94	0	259.44	0.5	2.955	0.995
8.22745	493.647	2.01	1.95	-0.03	7689.4	6942.3	21419.5	4.4	-38.95	2.75	3.115	17.88	20.65	0.8831	0.8865	0.9859	0.8907	19.9	4.539	7191.3	747.1	22.5853	3.96	4	1.99	2.62	2.66	2.96	2.99	1	0.95	0	261.37	0.5	2.955	1.005
8.26078	495.647	1.98	1.95	-0.04	7688.4	6942.8	21419.5	4.4	-38.96	2.75	3.115	17.89	20.64	0.883	0.8864	0.9859	0.8906	19.8	4.471	7191.3	745.6	22.5853	3.93	3.97	1.99	2.61	2.65	2.94	2.98	0.99	0.93	0	257.46	0.5	2.94	0.99
8.29412	497.647	1.98	1.95	-0.03	7689.7	6942.8	21420.8	4.4	-38.96	2.751	3.115	17.88	20.65	0.8831	0.8865	0.9859	0.8908	19.9	4.471	7191.8	746.9	22.5853	3.93	3.97	1.99	2.61	2.65	2.94	2.98	0.99	0.93	0	257.43	0.5	2.94	0.99
8.32745	499.647	2.01	1.96	-0.03	7689.1	6943.3	21421.1	4.4	-38.95	2.75	3.115	17.88	20.67	0.8831	0.8865	0.986	0.8907	19.9	4.539	7191.9	745.8	22.5853	3.97	4	1.99	2.63	2.66	2.96	2.99	1	0.95	0	261.39	0.5	2.965	1.005
8.36078	501.647	1.99	1.95	-0.03	7688.4	6943.3	21420.4	4.4	-38.95	2.75	3.115	17.88	20.68	0.883	0.8864	0.986	0.8906	19.8	4.505	7191.7	745.1	22.5853	3.95	3.98	1.99	2.62	2.65	2.95	2.98	1	0.94	0	259.44	0.5	2.95	0.995
8.39412	503.647	1.99	1.96	-0.03	7688.8	6943.8	21421.8	4.4	-38.95	2.75	3.114	17.88	20.68	0.883	0.8865	0.9861	0.8907	19.9	4.505	7192.1	744.9	22.5853	3.95	3.99	1.99	2.62	2.66	2.95	2.99	1	0.94	0	259.44	0.5	2.955	0.995
8.42743	505.646	2.01	1.96	-0.03	7688.8	6943.8	21421.8	4.4	-38.95	2.751	3.115	17.88	20.68	0.883	0.8865	0.9861	0.8907	20	4.539	7192.1	744.9	22.5853	3.97	4	1.99	2.63	2.66	2.96	3	1	0.95	0	261.4	0.5	2.965	1.005
8.46077	507.646	1.99	1.95	-0.03	7689.1	6943.8	21422.1	4.4	-38.94	2.75	3.115	17.88	20.67	0.8831	0.8865	0.9861	0.8907	19.7	4.505	7192.2	745.2	22.5853	3.95	3.98	1.99	2.62	2.65	2.95	2.98	1	0.94	0	259.42	0.5	2.95	0.995
8.4941	509.646	2.01	1.95	-0.03	7688.8	6943.8	21421.8	4.4	-38.95	2.75	3.115	17.88	20.67	0.883	0.8865	0.9861	0.8907	19.9	4.539	7192.1	744.9	22.5853	3.96	4	1.99	2.62	2.66	2.96	2.99	1	0.95	0	261.39	0.5	2.955	1.005
8.52743	511.646	2.01	1.95	-0.03	7688.4	6944.3	21422.4	4.4	-38.95	2.75	3.115	17.87	20.67	0.883	0.8864	0.9862	0.8906	19.6	4.539	7192.4	744.1	22.5852	3.96	3.99	1.98	2.62	2.65	2.96	2.99	1	0.95	0	261.4	0.5	2.955	1.005
8.56077	513.646	1.99	1.95	-0.03	7688.1	6944.3	21422.1	4.4	-38.95	2.75	3.115	17.87	20.68	0.8829	0.8864	0.9862	0.8906	19.6	4.505	7192.3	743.8	22.5852	3.94	3.97	1.98	2.61	2.64	2.95	2.97	1	0.94	0	259.43	0.5	2.945	0.995
8.5941	515.646	2.01	1.95	-0.04	7689.1	6944.8	21424.1	4.4	-38.95	2.75	3.116	17.87	20.67	0.8831	0.8865	0.9862	0.8907	19.5	4.539	7192.9	744.2	22.5852	3.96	4	1.99	2.62	2.66	2.96	3	1	0.95	0	261.38	0.5	2.955	1.005
8.62743	517.646	2.01	1.95	-0.04	7688.4	6944.8	21423.4	4.4	-38.96	2.751	3.116	17.88	20.64	0.883	0.8864	0.9862	0.8906	19.8	4.539	7192.7	743.6	22.5852	3.96	4	1.99	2.62	2.66	2.95	2.99	1	0.95	0	261.39	0.5	2.955	1.005
8.66075	519.645	1.99	1.95	-0.03	7688.7	6944.8	21423.8	4.4	-38.96	2.75	3.116	17.87	20.65	0.8831	0.8864	0.9862	0.8907	19.6	4.505	7192.8	743.9	22.5852	3.94	3.98	1.98	2.61	2.65	2.95	2.98	1	0.94	0	259.41	0.5	2.945	0.995
8.69408	521.645	2.01	1.95	-0.03	7689.1	6944.8	21424.1	4.4	-38.95	2.75	3.117	17.87	20.66	0.8831	0.8865	0.9862	0.8907	19.4	4.539	7192.9	744.2	22.5852	3.96	4	1.99	2.62	2.66	2.96	2.99	1	0.95	0	261.38	0.5	2.955	1.005
8.72742	523.645	1.98	1.95	-0.03	7688.4	6944.3	21422.5	4.4	-38.95	2.753	3.119	17.87	20.67	0.8829	0.8865	0.9862	0.8906	19.6	4.471	7192.4	744.1	22.5852	3.93	3.96	1.98	2.61	2.64	2.94	2.97	0.99	0.93	0	257.46	0.5	2.94	0.99
8.76075	525.645	2.01	1.94	-0.03	7688.4	6944.3	21422.4	4.4	-38.95	2.753	3.119	17.86	20.68	0.883	0.8864	0.9862	0.8906	19.6	4.539	7192.4	744.1	22.5852	3.95	3.99	1.98	2.61	2.65	2.95	2.98	1	0.95	0	261.37	0.5	2.945	1.005
8.79408	527.645	1.99	1.95	-0.03	7688.8	6944.3	21422.8	4.4	-38.95	2.754	3.119	17.85	20.67	0.883	0.8865	0.9862	0.8907	19.7	4.505	7192.5	744.4	22.5852	3.94	3.98	1.98	2.61	2.65	2.95	2.98	1	0.94	0	259.41	0.5	2.945	0.995
8.82742	529.645	2.01	1.95	-0.04	7688.7	6944.3	21422.8	4.4	-38.95	2.755	3.121	17.86	20.67	0.8831	0.8864	0.9862	0.8907	19.8	4.539	7192.5	744.4	22.5852	3.96	4	1.99	2.62	2.66	2.95	2.99	1	0.95	0	261.37	0.5	2.955	1.005
8.86075	531.645	1.99	1.94	-0.03	7687.7	6944.8	21422.8	4.4	-38.95	2.755	3.121	17.85	20.66	0.8829	0.8863	0.9862	0.8905	19.5	4.504	7192.5	742.9	22.5852	3.94	3.97	1.98	2.61	2.64	2.94	2.97	1	0.94	0	259.43	0.5	2.94	0.995
8.89407	533.644	2.04	1.94	-0.03	7688.8	6944.8	21423.8	4.5	-38.95	2.756	3.122	17.85	20.65	0.883	0.8865	0.9862	0.8907	19.7	4.607	7192.8	743.9	22.5852	3.98	4.02	1.98	2.62	2.66	2.96	3	1.02	0.96	0	265.28	0.5	2.96	1.02
8.9274	535.644	1.99	1.94	-0.03	7689.4	6944.8	21424.4	4.4	-38.95	2.756	3.121	17.84	20.66	0.8831	0.8865	0.9862	0.8907	19.8	4.504	7193	744.6	22.5852	3.93	3.97	1.97	2.6	2.64	2.94	2.97	1	0.94	0	259.36	0.5	2.935	0.995
8.96073	537.644	2.01	1.94	-0.04	7688.8	6944.3	21422.8	4.4	-38.96	2.755	3.121	17.84	20.66	0.883	0.8865	0.9862	0.8907	19.7	4.538	7192.5	744.4	22.5852	3.95	3.99	1.98	2.61	2.65	2.94	2.98	1	0.95	0	261.34	0.5	2.945	1.005
8.99407	539.644	2.01	1.94	-0.03	7689.1	6944.3	21423.1	4.4	-38.95	2.755	3.122	17.83	20.66	0.8831	0.8865	0.9862	0.8907	19.5	4.538	7192.6	744.7	22.5852	3.95	3.98	1.97	2.61	2.64	2.94	2.98	1	0.95	0	261.33	0.5	2.945	1.005
9.0274	541.644	2.01	1.93	-0.03	7689.1	6943.8	21422.1	4.4	-38.95	2.755	3.122	17.83	20.67	0.8831	0.8865	0.9861	0.8907	19.5	4.538	7192.2	745.2	22.5853	3.94	3.97	1.96	2.6	2.63	2.93	2.97	1	0.95	0	261.3	0.5	2.935	1.005
9.06073	543.644	1.99	1.93	-0.03	7688.7	6943.3	21420.7	4.4	-38.95	2.755	3.122	17.82	20.66	0.8831	0.8864	0.986	0.8907	19.5	4.504	7191.8	745.4	22.5853	3.93	3.96	1.97	2.6	2.63	2.93	2.96	1	0.94	0	259.37	0.5	2.93	0.995
9.09405	545.643	2.01	1.93	-0.03	7688.8	6943.3	21420.8	4.4	-38.95	2.756	3.122	17.81	20.68	0.883	0.8865	0.986	0.8907	19.7	4.538	7191.8	745.4	22.5853	3.94	3.97	1.96	2.6	2.63	2.94	2.97	1	0.95	0	261.33	0.5	2.935	1.005
9.12738	547.643	2.01	1.93	-0.03	7689.1	6942.8	21420.1	4.4	-38.95	2.755	3.122	17.8	20.68	0.8831	0.8865	0.9859	0.8907	19.5	4.538	7191.6	746.3	22.5853	3.94	3.98	1.97	2.6	2.64	2.94	2.97	1	0.95	0	261.32	0.5	2.935	1.005
9.16072	549.643	2.01	1.93	-0.03	7689.1	6942.3	21419.1	4.4	-38.95	2.755	3.122	17.81	20.66	0.8831	0.8865	0.9859	0.8907	19.5	4.538	7191.2	746.8	22.5853	3.93	3.97	1.96	2.59	2.63	2.93	2.96	1	0.95	0	261.29	0.5	2.93	1.005
9.19405	551.643	2.01	1.93	-0.04	7689.4	6941.8	21418.5	4.4	-38.96	2.746	3.112	17.8	20.65	0.8831	0.8865	0.9858	0.8907	19.4	4.538	7191	747.6	22.5854	3.94	3.98	1.97	2.6	2.64	2.94	2.98	1	0.95	0	261.3	0.5	2.935	1.005
9.22738	553.643	2.02	1.93	-0.04	7688.8	6941.8	21417.8	4.5	-38.95	2.74	3.104	17.79	20.66	0.883	0.8865	0.9858	0.8907	19.7	4.572	7190.8	747	22.5854	3.95	3.99	1.97	2.6	2.64	2.94	2.98	1.01	0.95	0	263.27	0.5	2.94	1.01
9.26072	555.643	2.01	1.92	-0.04	7688.7	6941.8	21417.8	4.4	-38.95	2.735	3.099	17.79	20.65	0.8831	0.8864	0.9858	0.8907	19.4	4.537	7190.8	746.9	22.5854	3.93	3.97	1.96	2.59	2.63	2.92	2.97	1	0.95	0	261.28	0.5	2.925	1.005
9.29405	557.643	2.01	1.93	-0.03	7689.1	6942.3	21419.1	4.4	-38.96	2.733	3.096	17.79	20.65	0.8831	0.8865	0.9859	0.8907	19.6	4.538	7191.2	746.8	22.5853	3.93	3.97	1.96	2.59	2.63	2.93	2.96	1	0.95	0	261.29	0.5	2.93	1.005
9.32737	559.642	1.98	1.92	-0.05	7689.1	6941.3	21417.1	4.4	-38.96	2.731	3.094	17.79	20.64	0.8831	0.8865	0.9857	0.8907	19.5	4.469	7190.6	747.8	22.5854	3.9	3.95	1.97	2.58	2.63	2.91	2.96	0.99	0.93	0	257.35	0.5	2.91	0.99
9.3607	561.642	2.01	1.92	-0.04	7689.4	6941.8	21418.4	4.4	-38.96	2.73	3.093	17.79	20.64	0.8831	0.8865	0.9858	0.8907	19.3	4.537	7191	747.6	22.5854	3.92	3.97	1.96	2.59	2.63	2.92	2.96	1	0.95	0	261.25	0.5	2.92	1.005
9.39403	563.642	1.99	1.92	-0.04	7689.4	6941.8	21418.5	4.4	-38.96	2.729	3.092	17.79	20.63	0.8831	0.8865	0.9858	0.8907	19.3	4.503	7191	747.6	22.5854	3.91	3.96	1.96	2.59	2.63	2.92	2.96	1	0.94	0	259.3	0.5	2.915	0.995
9.42737	565.642	2.01	1.92	-0.04	7689.1	6941.3	21417.1	4.4	-38.96	2.729	3.091	17.79	20.64	0.8831	0.8865	0.9857	0.8907	19.6	4.537	7190.6	747.8	22.5854	3.93	3.97	1.96	2.59	2.63	2.92	2.97	1	0.95	0	261.27	0.5	2.925	1.005
9.4607	567.642	1.99	1.92	-0.04	7689	6941.3	21417.1	4.4	-38.96	2.729	3.091	17.79	20.61	0.8831	0.8864	0.9857	0.8907	19.6	4.503	7190.5	747.7	22.5854	3.91	3.95	1.96	2.58	2.62	2.91	2.95	1	0.94	0	259.29	0.5	2.915	0.995
9.49403	569.642	2.02	1.92	-0.04	7689.4	6941.8	21418.5	4.5	-38.96	2.728	3.091	17.79	20.61	0.8831	0.8865	0.9858	0.8907	19.3	4.571	7191	747.6	22.5854	3.94	3.98	1.95	2.59	2.63	2.93	2.97	1.01	0.95	0	263.21	0.5	2.93	1.01
9.52735	571.641	1.99	1.92	-0.04	7689.4	6941.8	21418.4	4.4	-38.97	2.728	3.092	17.8	20.61	0.8831	0.8865	0.9858	0.8907	19.3	4.503	7191	747.6	22.5854	3.91	3.95	1.96	2.58	2.62	2.91	2.95	1	0.94	0	259.28	0.5	2.915	0.995
9.56068	573.641	1.99	1.92	-0.04	7688.4	6941.8	21417.5	4.4	-38.96	2.728	3.091	17.79	20.63	0.883	0.8864	0.9858	0.8906	19.4	4.503	7190.7	746.6	22.5854	3.91	3.95	1.96	2.58	2.62	2.91	2.95	1	0.94	0	259.32	0.5	2.915	0.995
9.59402	575.641	2.01	1.92	-0.04	7689.1	6941.8	21418.1	4.4	-38.96	2.728	3.091	17.79	20.63	0.8831	0.8865	0.9858	0.8907	19.4	4.537	7190.9	747.3	22.5854	3.93	3.97	1.96	2.59	2.63	2.92	2.96	1	0.95	0	261.27	0.5	2.925	1.005
9.62735	577.641	2.02	1.92	-0.04	7689.1	6941.8	21418.1	4.5	-38.96	2.729	3.09	17.79	20.64	0.8831	0.8865	0.9858	0.8907	19.7	4.571	7190.9	747.3	22.5854	3.94	3.98	1.95	2.59	2.63	2.93	2.97	1.01	0.95	0	263.22	0.5	2.93	1.01
9.66068	579.641	1.99	1.92	-0.04	7688.4	6942.8	21419.5	4.4	-38.96	2.728	3.09	17.8	20.64	0.883	0.8864	0.9859	0.8906	19.4	4.503	7191.3	745.6	22.5853	3.91	3.96	1.96	2.59	2.63	2.92	2.96	1	0.94	0	259.33	0.5	2.915	0.995
9.69402	581.641	1.98	1.92	-0.04	7688.7	6942.8	21419.7	4.4	-38.96	2.727	3.09	17.79	20.68	0.8832	0.8862	0.9859	0.8907	19.4	4.469	7191.4	745.9	22.5853	3.89	3.93	1.95	2.58	2.61	2.91	2.94	0.99	0.93	0	257.35	0.5	2.905	0.99
9.72735	583.641	1.99	1.92	-0.04	7689	6942.8	21420.1	4.4	-38.97	2.726	3.09	17.79	20.65	0.8833	0.8862	0.9859	0.8907	19.1	4.503	7191.5	746.2	22.5853	3.91	3.95	1.96	2.58	2.62	2.91	2.95	1	0.94	0	259.3	0.5	2.915	0.995
9.76067	585.64	2.04	1.92	-0.04	7688.7	6942.8	21419.7	4.5	-38.96	2.726	3.089	17.79	20.66	0.8832	0.8862	0.9859	0.8907	19.2	4.605	7191.4	745.9	22.5853	3.95	3.99	1.95	2.6	2.63	2.94	2.97	1.02	0.96	0	265.19	0.5	2.935	1.02
9.794	587.64	2.02	1.92	-0.04	7688.6	6942.8	21419.7	4.5	-38.96	2.726	3.089	17.79	20.67	0.8833	0.8861	0.9859	0.8907	19.4	4.571	7191.4	745.8	22.5853	3.94	3.98	1.96	2.6	2.63	2.93	2.97	1.01	0.95	0	263.25	0.5	2.93	1.01
9.82733	589.64	1.99	1.92	-0.04	7689	6943.3	21421	4.4	-38.96	2.726	3.088	17.79	20.68	0.8832	0.8863	0.986	0.8907	19.5	4.503	7191.9	745.7	22.5853	3.91	3.95	1.96	2.59	2.62	2.92	2.95	1	0.94	0	259.31	0.5	2.915	0.995
9.86067	591.64	2.02	1.92	-0.04	7688.7	6943.3	21420.7	4.5	-38.96	2.726	3.088	17.79	20.69	0.8832	0.8862	0.986	0.8907	19.3	4.571	7191.8	745.4	22.5853	3.94	3.98	1.96	2.59	2.63	2.93	2.97	1.01	0.95	0	263.23	0.5	2.93	1.01
9.894	593.64	2.02	1.92	-0.04	7688.7	6943.8	21421.7	4.5	-38.96	2.725	3.089	17.79	20.7	0.8831	0.8863	0.9861	0.8907	19.1	4.571	7192.1	744.9	22.5853	3.94	3.98	1.96	2.6	2.63	2.93	2.97	1.01	0.95	0	263.25	0.5	2.93	1.01
9.92733	595.64	2.01	1.92	-0.05	7688.7	6943.3	21420.7	4.4	-38.96	2.725	3.087	17.79	21.23	0.8832	0.8862	0.986	0.8907	19.4	4.537	7191.8	745.4	22.5853	3.92	3.97	1.96	2.59	2.63	2.92	2.97	1	0.95	0	261.27	0.5	2.92	1.005
9.96065	597.639	2.01	1.92	-0.04	7688.7	6943.3	21420.7	4.4	-38.96	2.725	3.087	17.79	21.78	0.8832	0.8862	0.986	0.8907	19.4	4.537	7191.8	745.4	22.5853	3.92	3.97	1.96	2.59	2.63	2.92	2.96	1	0.95	0	261.27	0.5	2.92	1.005
9.99398	599.639	1.99	1.92	-0.04	7688.7	6943.3	21420.7	4.4	-38.97	2.725	3.088	17.79	22.53	0.8832	0.8862	0.986	0.8907	19.2	4.503	7191.8	745.4	22.5853	3.91	3.96	1.96	2.59	2.63	2.92	2.96	1	0.94	0	259.32	0.5	2.915	0.995
10.0273	601.639	2.01	1.91	-0.05	7689	6943.3	21421	4.4	-38.97	2.726	3.089	17.79	23.14	0.8832	0.8863	0.986	0.8907	19.4	4.537	7191.9	745.7	22.5853	3.92	3.97	1.96	2.58	2.63	2.92	2.96	1	0.95	0	261.24	0.5	2.915	1.005
10.0607	603.639	1.98	1.91	-0.05	7688.3	6943.3	21420.3	4.4	-38.97	2.727	3.09	17.79	23.79	0.8832	0.8861	0.986	0.8906	19.4	4.469	7191.7	745	22.5853	3.89	3.94	1.96	2.57	2.62	2.9	2.95	0.99	0.93	0	257.34	0.5	2.9	0.99
10.094	605.639	1.99	1.92	-0.04	7689	6943.8	21422	4.4	-38.97	2.726	3.09	17.79	24.61	0.8832	0.8863	0.9861	0.8907	19.1	4.503	7192.2	745.2	22.5853	3.91	3.95	1.95	2.58	2.62	2.91	2.95	1	0.94	0	259.3	0.5	2.915	0.995
10.1273	607.639	2.02	1.92	-0.04	7689	6943.3	21421	4.5	-38.97	2.726	3.09	17.79	25.43	0.8832	0.8863	0.986	0.8907	19.1	4.571	7191.9	745.7	22.5853	3.94	3.98	1.96	2.59	2.63	2.93	2.97	1.01	0.95	0	263.22	0.5	2.93	1.01
10.1607	609.639	1.99	1.92	-0.04	7689	6943.8	21422	4.4	-38.96	2.726	3.09	17.79	26.27	0.8832	0.8863	0.9861	0.8907	19.2	4.503	7192.2	745.2	22.5853	3.91	3.95	1.96	2.58	2.62	2.91	2.95	1	0.94	0	259.3	0.5	2.915	0.995
10.194	611.638	1.99	1.92	-0.04	7688.7	6943.3	21420.7	4.4	-38.96	2.726	3.09	17.78	26.99	0.8832	0.8862	0.986	0.8907	19.1	4.503	7191.8	745.4	22.5853	3.91	3.95	1.95	2.58	2.62	2.91	2.95	1	0.94	0	259.31	0.5	2.915	0.995
10.2273	613.638	1.99	1.91	-0.04	7688.4	6943.3	21420.4	4.4	-38.96	2.728	3.09	17.79	27.69	0.8831	0.8862	0.986	0.8906	19.5	4.503	7191.7	745	22.5853	3.9	3.94	1.95	2.58	2.61	2.91	2.95	1	0.94	0	259.3	0.5	2.905	0.995
10.2606	615.638	1.96	1.92	-0.04	7688	6943.3	21420	4.3	-38.96	2.726	3.09	17.78	28.38	0.8831	0.8861	0.986	0.8906	19.1	4.435	7191.6	744.7	22.5853	3.88	3.92	1.96	2.57	2.61	2.9	2.94	0.98	0.93	0	255.41	0.5	2.9	0.98
10.294	617.638	1.96	1.92	-0.03	7688.3	6943.8	21421.4	4.3	-38.96	2.726	3.09	17.78	29.18	0.8832	0.8861	0.9861	0.8906	19.2	4.435	7192	744.5	22.5853	3.88	3.91	1.95	2.57	2.6	2.9	2.93	0.98	0.93	0	255.4	0.5	2.9	0.98
10.3273	619.638	1.98	1.92	-0.04	7688.7	6943.3	21420.7	4.4	-38.97	2.728	3.091	17.78	29.95	0.8832	0.8862	0.986	0.8907	19.3	4.469	7191.8	745.4	22.5853	3.89	3.94	1.96	2.58	2.62	2.91	2.95	0.99	0.93	0	257.35	0.5	2.905	0.99
10.3606	621.638	1.99	1.91	-0.04	7688.7	6943.8	21421.7	4.4	-38.96	2.727	3.09	17.79	30.66	0.8832	0.8862	0.9861	0.8907	19.3	4.503	7192.1	744.8	22.5853	3.9	3.95	1.95	2.58	2.62	2.91	2.95	1	0.94	0	259.29	0.5	2.905	0.995
10.394	623.638	1.99	1.91	-0.04	7689	6943.8	21422	4.4	-38.97	2.727	3.091	17.78	31.33	0.8832	0.8863	0.9861	0.8907	19.1	4.503	7192.2	745.2	22.5853	3.9	3.95	1.95	2.58	2.62	2.91	2.95	1	0.94	0	259.28	0.5	2.905	0.995
10.4273	625.637	2.01	1.91	-0.04	7688.7	6943.8	21421.7	4.4	-38.97	2.728	3.091	17.78	31.98	0.8831	0.8863	0.9861	0.8907	19.3	4.536	7192.1	744.9	22.5853	3.92	3.96	1.95	2.58	2.62	2.91	2.95	1	0.95	0	261.24	0.5	2.915	1.005
10.4606	627.637	2.01	1.91	-0.04	7688.4	6944.3	21422.4	4.4	-38.96	2.727	3.09	17.78	32.67	0.8831	0.8862	0.9862	0.8906	19.3	4.536	7192.3	744	22.5852	3.92	3.96	1.95	2.58	2.62	2.91	2.95	1	0.95	0	261.25	0.5	2.915	1.005
10.4939	629.637	1.99	1.91	-0.04	7688.7	6943.8	21421.7	4.4	-38.97	2.727	3.09	17.78	33.44	0.8832	0.8862	0.9861	0.8907	19.3	4.502	7192.1	744.8	22.5853	3.9	3.94	1.94	2.57	2.61	2.9	2.94	1	0.94	0	259.28	0.5	2.905	0.995
10.5273	631.637	2.01	1.91	-0.05	7689	6943.8	21422	4.4	-38.96	2.727	3.09	17.78	34.28	0.8832	0.8863	0.9861	0.8907	19.3	4.536	7192.2	745.2	22.5853	3.92	3.96	1.95	2.58	2.62	2.91	2.96	1	0.95	0	261.23	0.5	2.915	1.005
10.5606	633.637	2.01	1.91	-0.05	7688.3	6944.3	21422.4	4.4	-38.97	2.726	3.09	17.78	35.02	0.8832	0.8861	0.9862	0.8906	19.2	4.536	7192.3	744	22.5852	3.92	3.96	1.95	2.58	2.62	2.91	2.96	1	0.95	0	261.25	0.5	2.915	1.005
10.5939	635.637	2.02	1.91	-0.04	7688.7	6944.3	21422.7	4.5	-38.97	2.727	3.09	17.78	35.55	0.8832	0.8862	0.9862	0.8907	19.3	4.571	7192.4	744.3	22.5852	3.94	3.97	1.95	2.59	2.62	2.92	2.96	1.01	0.95	0	263.22	0.5	2.925	1.01
10.6273	637.636	2.02	1.9	-0.05	7689.3	6943.8	21422.3	4.5	-38.97	2.726	3.09	17.77	36.32	0.8833	0.8863	0.9861	0.8907	19.2	4.57	7192.3	745.5	22.5853	3.92	3.97	1.94	2.57	2.62	2.91	2.95	1.01	0.95	0	263.15	0.5	2.91	1.01
10.6606	639.636	1.99	1.9	-0.04	7689	6944.3	21423	4.4	-38.97	2.727	3.091	17.77	37.07	0.8833	0.8862	0.9862	0.8907	19.1	4.502	7192.6	744.7	22.5852	3.9	3.94	1.94	2.57	2.61	2.9	2.94	1	0.94	0	259.25	0.5	2.9	0.995
10.6939	641.636	1.98	1.9	-0.04	7689	6944.3	21423	4.4	-38.97	2.726	3.09	17.77	37.81	0.8832	0.8863	0.9862	0.8907	19.1	4.468	7192.6	744.7	22.5852	3.88	3.92	1.94	2.56	2.6	2.89	2.93	0.99	0.93	0	257.29	0.5	2.89	0.99
10.7273	643.636	2.01	1.9	-0.04	7688.7	6943.8	21421.7	4.4	-38.97	2.727	3.091	17.76	38.66	0.8832	0.8862	0.9861	0.8907	19.1	4.536	7192.1	744.8	22.5853	3.91	3.95	1.94	2.57	2.61	2.91	2.94	1	0.95	0	261.23	0.5	2.905	1.005
10.7606	645.636	2.01	1.9	-0.04	7688.7	6943.3	21420.7	4.4	-38.97	2.727	3.09	17.76	39.51	0.8832	0.8862	0.986	0.8907	19.3	4.536	7191.8	745.4	22.5853	3.91	3.95	1.94	2.57	2.61	2.9	2.94	1	0.95	0	261.21	0.5	2.905	1.005
10.7939	647.636	2.02	1.9	-0.04	7689.4	6943.8	21422.4	4.5	-38.96	2.727	3.091	17.76	40.27	0.8832	0.8864	0.9861	0.8907	19.1	4.57	7192.3	745.5	22.5853	3.92	3.96	1.94	2.57	2.61	2.91	2.95	1.01	0.95	0	263.15	0.5	2.91	1.01
10.8273	649.636	2.01	1.9	-0.04	7689.3	6943.3	21421.3	4.4	-38.97	2.728	3.092	17.76	41.03	0.8833	0.8863	0.986	0.8907	19.1	4.536	7192	746	22.5853	3.91	3.95	1.94	2.57	2.61	2.9	2.94	1	0.95	0	261.19	0.5	2.905	1.005
10.8606	651.635	1.98	1.89	-0.05	7688	6943.3	21420	4.4	-38.97	2.728	3.092	17.75	41.92	0.8831	0.8861	0.986	0.8906	19.1	4.468	7191.6	744.7	22.5853	3.87	3.92	1.94	2.55	2.6	2.88	2.93	0.99	0.93	0	257.29	0.5	2.88	0.99
10.8939	653.635	2.01	1.9	-0.04	7688.7	6942.8	21419.7	4.4	-38.97	2.727	3.092	17.74	42.79	0.8832	0.8862	0.9859	0.8907	19	4.536	7191.4	745.9	22.5853	3.91	3.95	1.94	2.57	2.61	2.9	2.94	1	0.95	0	261.21	0.5	2.905	1.005
10.9272	655.635	1.99	1.89	-0.04	7688.7	6943.3	21420.7	4.4	-38.96	2.727	3.092	17.74	43.59	0.8831	0.8863	0.986	0.8907	19	4.502	7191.8	745.4	22.5853	3.89	3.93	1.93	2.56	2.6	2.89	2.93	1	0.94	0	259.23	0.5	2.89	0.995
10.9606	657.635	2.01	1.89	-0.04	7688.7	6942.8	21419.7	4.4	-38.96	2.728	3.092	17.73	44.4	0.8832	0.8862	0.9859	0.8907	19.1	4.536	7191.4	745.9	22.5853	3.9	3.94	1.93	2.56	2.6	2.9	2.93	1	0.95	0	261.19	0.5	2.895	1.005
10.9939	659.635	2.01	1.89	-0.04	7688.7	6942.8	21419.7	4.4	-38.97	2.727	3.092	17.73	45.24	0.8832	0.8862	0.9859	0.8907	18.9	4.536	7191.4	745.9	22.5853	3.9	3.94	1.93	2.56	2.6	2.9	2.94	1	0.95	0	261.19	0.5	2.895	1.005
11.0273	661.635	1.98	1.89	-0.04	7688.7	6942.3	21418.7	4.4	-38.97	2.728	3.093	17.74	45.8	0.8832	0.8862	0.9859	0.8907	19	4.467	7191.1	746.4	22.5853	3.87	3.91	1.93	2.55	2.59	2.88	2.92	0.99	0.93	0	257.26	0.5	2.88	0.99
11.0606	663.634	2.02	1.88	-0.05	7688.7	6942.3	21418.8	4.5	-38.97	2.728	3.094	17.74	45.98	0.8831	0.8863	0.9859	0.8907	18.9	4.569	7191.1	746.4	22.5853	3.91	3.95	1.93	2.56	2.6	2.9	2.94	1.01	0.95	0	263.13	0.5	2.895	1.01
11.0939	665.634	1.98	1.89	-0.04	7689.3	6942.3	21419.4	4.4	-38.97	2.729	3.094	17.73	46.56	0.8833	0.8863	0.9859	0.8907	19.1	4.467	7191.3	747	22.5853	3.87	3.9	1.93	2.55	2.58	2.88	2.91	0.99	0.93	0	257.23	0.5	2.88	0.99
11.1272	667.634	1.99	1.88	-0.04	7689	6941.8	21418.1	4.4	-38.98	2.73	3.094	17.74	47.24	0.8832	0.8863	0.9858	0.8907	19.2	4.501	7190.9	747.2	22.5854	3.88	3.92	1.93	2.55	2.59	2.88	2.92	1	0.94	0	259.19	0.5	2.88	0.995
11.1606	669.634	1.99	1.89	-0.04	7689	6941.8	21418.1	4.4	-38.97	2.729	3.094	17.73	48	0.8832	0.8863	0.9858	0.8907	19.1	4.501	7190.9	747.2	22.5854	3.88	3.92	1.93	2.55	2.59	2.88	2.93	1	0.94	0	259.21	0.5	2.885	0.995
11.1939	671.634	1.99	1.88	-0.04	7688.7	6942.3	21418.7	4.4	-38.97	2.729	3.095	17.73	48.69	0.8832	0.8862	0.9859	0.8907	18.9	4.501	7191.1	746.4	22.5853	3.88	3.92	1.93	2.55	2.59	2.88	2.92	1	0.94	0	259.2	0.5	2.88	0.995
11.2272	673.634	2.01	1.88	-0.05	7688.7	6942.3	21418.8	4.4	-38.97	2.73	3.095	17.73	48.82	0.8831	0.8863	0.9859	0.8907	19.1	4.535	7191.1	746.4	22.5853	3.89	3.94	1.93	2.55	2.6	2.89	2.93	1	0.95	0	261.16	0.5	2.885	1.005
11.2606	675.634	1.99	1.88	-0.05	7688.7	6942.3	21418.7	4.4	-38.97	2.73	3.095	17.73	49.4	0.8832	0.8862	0.9859	0.8907	19.1	4.501	7191.1	746.4	22.5853	3.88	3.92	1.93	2.55	2.59	2.88	2.93	1	0.94	0	259.2	0.5	2.88	0.995
11.2939	677.633	2.01	1.89	-0.05	7688.3	6942.3	21418.4	4.4	-38.98	2.73	3.095	17.73	50.25	0.8832	0.8861	0.9859	0.8906	19	4.535	7191	746	22.5853	3.9	3.94	1.93	2.56	2.6	2.89	2.94	1	0.95	0	261.19	0.5	2.895	1.005
11.3272	679.633	1.98	1.88	-0.05	7688.7	6941.8	21417.7	4.4	-38.98	2.73	3.096	17.74	51.13	0.8832	0.8862	0.9858	0.8907	19	4.467	7190.8	746.9	22.5854	3.86	3.91	1.93	2.54	2.59	2.87	2.92	0.99	0.93	0	257.24	0.5	2.87	0.99
11.3605	681.633	1.98	1.87	-0.05	7688.7	6941.3	21416.7	4.4	-38.99	2.73	3.096	17.74	51.95	0.8832	0.8862	0.9857	0.8907	18.8	4.466	7190.4	747.4	22.5854	3.85	3.9	1.92	2.53	2.58	2.86	2.91	0.99	0.93	0	257.21	0.5	2.86	0.99
11.3939	683.633	2.01	1.88	-0.05	7689.3	6942.3	21419.4	4.4	-38.99	2.731	3.096	17.74	52.6	0.8833	0.8863	0.9859	0.8907	19.1	4.535	7191.3	747	22.5853	3.89	3.94	1.93	2.55	2.6	2.89	2.93	1	0.95	0	261.14	0.5	2.885	1.005
11.4272	685.633	1.98	1.88	-0.05	7688.7	6941.3	21416.7	4.4	-38.99	2.731	3.096	17.74	52.78	0.8832	0.8862	0.9857	0.8907	19.1	4.467	7190.4	747.4	22.5854	3.86	3.9	1.92	2.54	2.58	2.87	2.91	0.99	0.93	0	257.23	0.5	2.87	0.99
11.4606	687.633	2.01	1.88	-0.05	7688.7	6942.3	21418.7	4.4	-38.98	2.731	3.096	17.74	52.86	0.8832	0.8862	0.9859	0.8907	19.1	4.535	7191.1	746.4	22.5853	3.89	3.94	1.93	2.55	2.6	2.89	2.93	1	0.95	0	261.16	0.5	2.885	1.005
11.4939	689.633	1.98	1.89	-0.05	7689	6942.3	21419.1	4.4	-38.98	2.73	3.096	17.74	53.2	0.8832	0.8863	0.9859	0.8907	19	4.467	7191.2	746.7	22.5853	3.87	3.91	1.93	2.55	2.59	2.88	2.92	0.99	0.93	0	257.24	0.5	2.88	0.99
11.5272	691.632	2.01	1.88	-0.05	7688.4	6942.3	21418.4	4.4	-38.98	2.73	3.096	17.74	53.89	0.8831	0.8862	0.9859	0.8906	19	4.535	7191	746	22.5853	3.89	3.94	1.93	2.55	2.6	2.88	2.93	1	0.95	0	261.16	0.5	2.885	1.005
11.5605	693.632	1.99	1.88	-0.05	7688.4	6942.3	21418.4	4.4	-38.98	2.73	3.096	17.74	54.53	0.8831	0.8862	0.9859	0.8906	18.8	4.501	7191	746	22.5853	3.88	3.92	1.93	2.55	2.59	2.88	2.93	1	0.94	0	259.21	0.5	2.88	0.995
11.5939	695.632	2.01	1.89	-0.05	7689	6942.3	21419	4.4	-38.98	2.73	3.096	17.73	55.06	0.8833	0.8862	0.9859	0.8907	18.8	4.535	7191.2	746.7	22.5853	3.9	3.94	1.93	2.56	2.6	2.89	2.94	1	0.95	0	261.17	0.5	2.895	1.005
11.6272	697.632	1.99	1.88	-0.05	7689.3	6942.8	21420.4	4.4	-38.98	2.73	3.095	17.74	55.85	0.8833	0.8863	0.9859	0.8907	19.1	4.501	7191.7	746.5	22.5853	3.88	3.92	1.93	2.55	2.59	2.88	2.93	1	0.94	0	259.18	0.5	2.88	0.995
11.6605	699.632	1.99	1.89	-0.04	7688.4	6942.8	21419.4	4.4	-38.97	2.73	3.095	17.74	56.63	0.8831	0.8862	0.9859	0.8906	19.2	4.501	7191.3	745.5	22.5853	3.88	3.92	1.93	2.55	2.59	2.88	2.93	1	0.94	0	259.23	0.5	2.885	0.995
11.6939	701.632	2.01	1.88	-0.04	7688.7	6942.8	21419.7	4.4	-38.98	2.73	3.095	17.74	57.34	0.8832	0.8862	0.9859	0.8907	19	4.535	7191.4	745.9	22.5853	3.89	3.93	1.93	2.55	2.59	2.89	2.93	1	0.95	0	261.16	0.5	2.885	1.005
11.7272	703.631	1.99	1.89	-0.05	7689	6942.8	21420.1	4.4	-38.97	2.73	3.095	17.74	58.04	0.8832	0.8863	0.9859	0.8907	19.2	4.501	7191.6	746.2	22.5853	3.88	3.93	1.93	2.55	2.6	2.88	2.93	1	0.94	0	259.21	0.5	2.885	0.995
11.7605	705.631	1.99	1.88	-0.05	7688.4	6942.8	21419.4	4.4	-38.97	2.73	3.095	17.74	58.79	0.8831	0.8862	0.9859	0.8906	19.1	4.501	7191.3	745.5	22.5853	3.88	3.92	1.93	2.55	2.59	2.88	2.93	1	0.94	0	259.21	0.5	2.88	0.995
11.7938	707.631	1.99	1.88	-0.04	7688.7	6942.8	21419.7	4.4	-38.98	2.73	3.095	17.74	59.53	0.8832	0.8862	0.9859	0.8907	19	4.501	7191.4	745.9	22.5853	3.88	3.92	1.93	2.55	2.59	2.88	2.92	1	0.94	0	259.2	0.5	2.88	0.995
11.8272	709.631	1.98	1.88	-0.05	7689	6943.3	21421	4.4	-38.98	2.73	3.095	17.75	60.16	0.8832	0.8863	0.986	0.8907	19.1	4.467	7191.9	745.7	22.5853	3.86	3.91	1.93	2.54	2.59	2.87	2.92	0.99	0.93	0	257.23	0.5	2.87	0.99
11.8605	711.631	2.01	1.88	-0.05	7688.7	6943.3	21420.7	4.4	-38.98	2.731	3.096	17.75	60.27	0.8832	0.8862	0.986	0.8907	19.1	4.535	7191.8	745.4	22.5853	3.89	3.94	1.93	2.55	2.6	2.89	2.93	1	0.95	0	261.16	0.5	2.885	1.005
11.8938	713.631	1.98	1.88	-0.05	7689.3	6943.3	21421.3	4.4	-38.98	2.73	3.096	17.75	60.25	0.8833	0.8863	0.986	0.8907	19	4.467	7192	746	22.5853	3.86	3.91	1.93	2.54	2.59	2.87	2.92	0.99	0.93	0	257.22	0.5	2.87	0.99
11.9272	715.631	1.98	1.88	-0.05	7688.4	6943.3	21420.4	4.4	-38.98	2.732	3.096	17.75	60.93	0.8831	0.8862	0.986	0.8906	19.3	4.467	7191.7	745	22.5853	3.86	3.9	1.92	2.54	2.58	2.87	2.91	0.99	0.93	0	257.24	0.5	2.87	0.99
11.9605	717.63	1.96	1.88	-0.05	7687.7	6943.8	21420.7	4.3	-38.98	2.73	3.096	17.75	61.87	0.8831	0.8861	0.9861	0.8905	18.8	4.433	7191.8	743.9	22.5853	3.84	3.89	1.92	2.53	2.58	2.86	2.91	0.98	0.93	0	255.3	0.5	2.86	0.98
11.9938	719.63	2.02	1.88	-0.04	7688.7	6943.3	21420.7	4.5	-38.98	2.73	3.095	17.74	62.84	0.8832	0.8862	0.986	0.8907	19	4.569	7191.8	745.4	22.5853	3.9	3.94	1.92	2.55	2.59	2.89	2.93	1.01	0.95	0	263.11	0.5	2.89	1.01
12.0272	721.63	2.01	1.88	-0.05	7688.7	6943.3	21420.7	4.4	-38.98	2.73	3.095	17.75	63.82	0.8832	0.8862	0.986	0.8907	19.1	4.535	7191.8	745.4	22.5853	3.89	3.94	1.93	2.55	2.6	2.89	2.93	1	0.95	0	261.16	0.5	2.885	1.005
12.0605	723.63	1.96	1.89	-0.05	7689	6943.3	21421	4.3	-38.98	2.73	3.096	17.75	64.66	0.8832	0.8863	0.986	0.8907	19	4.433	7191.9	745.7	22.5853	3.85	3.9	1.93	2.54	2.59	2.87	2.92	0.98	0.93	0	255.28	0.5	2.87	0.98
12.0938	725.63	1.98	1.88	-0.05	7688.7	6943.8	21421.7	4.4	-38.98	2.73	3.097	17.75	65.46	0.8831	0.8863	0.9861	0.8907	18.7	4.467	7192.1	744.9	22.5853	3.86	3.91	1.93	2.54	2.59	2.87	2.92	0.99	0.93	0	257.23	0.5	2.87	0.99
12.1272	727.63	1.98	1.88	-0.05	7689	6944.3	21423	4.4	-38.98	2.73	3.096	17.75	66.32	0.8832	0.8863	0.9862	0.8907	19	4.467	7192.6	744.7	22.5852	3.86	3.9	1.92	2.54	2.58	2.87	2.91	0.99	0.93	0	257.22	0.5	2.87	0.99
12.1605	729.629	1.96	1.88	-0.05	7689	6943.8	21422	4.3	-38.98	2.73	3.095	17.75	67.23	0.8832	0.8863	0.9861	0.8907	19	4.433	7192.2	745.2	22.5853	3.84	3.89	1.92	2.53	2.58	2.86	2.91	0.98	0.93	0	255.25	0.5	2.86	0.98
12.1938	731.629	1.95	1.88	-0.05	7688.3	6943.8	21421.4	4.3	-38.99	2.73	3.096	17.74	68.18	0.8832	0.8861	0.9861	0.8906	18.8	4.399	7192	744.5	22.5853	3.83	3.88	1.93	2.53	2.58	2.86	2.9	0.97	0.92	0	253.33	0.5	2.855	0.975
12.2271	733.629	1.96	1.87	-0.05	7689	6943.3	21421	4.3	-38.98	2.73	3.096	17.75	68.97	0.8832	0.8863	0.986	0.8907	18.8	4.432	7191.9	745.7	22.5853	3.84	3.88	1.92	2.53	2.57	2.86	2.9	0.98	0.93	0	255.24	0.5	2.855	0.98
12.2605	735.629	1.96	1.88	-0.05	7688.3	6944.3	21422.4	4.3	-38.98	2.731	3.097	17.75	69.65	0.8832	0.8861	0.9862	0.8906	19	4.433	7192.3	744	22.5852	3.84	3.89	1.92	2.53	2.58	2.86	2.91	0.98	0.93	0	255.28	0.5	2.86	0.98
12.2938	737.629	1.98	1.88	-0.05	7689	6944.8	21424	4.4	-38.98	2.73	3.096	17.74	70.32	0.8832	0.8863	0.9862	0.8907	19	4.467	7192.9	744.2	22.5852	3.86	3.91	1.93	2.54	2.59	2.87	2.92	0.99	0.93	0	257.23	0.5	2.87	0.99
12.3271	739.629	1.98	1.88	-0.05	7688.7	6943.3	21420.7	4.4	-38.98	2.73	3.097	17.74	70.96	0.8832	0.8862	0.986	0.8907	18.9	4.467	7191.8	745.4	22.5853	3.86	3.9	1.92	2.54	2.58	2.87	2.91	0.99	0.93	0	257.23	0.5	2.87	0.99
12.3605	741.629	1.98	1.88	-0.04	7689	6943.8	21422	4.4	-38.98	2.731	3.095	17.74	71.6	0.8833	0.8862	0.9861	0.8907	19.3	4.467	7192.2	745.2	22.5853	3.86	3.9	1.92	2.54	2.58	2.87	2.91	0.99	0.93	0	257.22	0.5	2.87	0.99
12.3938	743.628	2.01	1.88	-0.04	7688.6	6944.3	21422.7	4.4	-38.98	2.73	3.096	17.74	72.4	0.8833	0.8861	0.9862	0.8907	19	4.535	7192.4	744.3	22.5852	3.89	3.93	1.93	2.55	2.59	2.89	2.93	1	0.95	0	261.17	0.5	2.885	1.005
12.4271	745.628	1.99	1.87	-0.05	7688.3	6943.8	21421.4	4.4	-38.98	2.73	3.096	17.75	73.32	0.8832	0.8861	0.9861	0.8906	19	4.501	7192	744.5	22.5853	3.87	3.91	1.92	2.54	2.58	2.87	2.92	1	0.94	0	259.18	0.5	2.87	0.995
12.4605	747.628	1.99	1.87	-0.05	7688.4	6943.3	21420.4	4.4	-38.99	2.73	3.096	17.74	74.22	0.8831	0.8862	0.986	0.8906	18.8	4.5	7191.7	745	22.5853	3.86	3.91	1.92	2.53	2.58	2.87	2.91	1	0.94	0	259.17	0.5	2.865	0.995
12.4938	749.628	1.96	1.88	-0.04	7688.4	6943.8	21421.4	4.3	-38.99	2.73	3.097	17.74	74.99	0.8831	0.8862	0.9861	0.8906	18.7	4.433	7192	744.5	22.5853	3.84	3.88	1.92	2.53	2.57	2.86	2.9	0.98	0.93	0	255.28	0.5	2.86	0.98
12.5271	751.628	1.99	1.87	-0.05	7689	6944.3	21423	4.4	-38.99	2.73	3.097	17.75	75.83	0.8832	0.8863	0.9862	0.8907	18.9	4.5	7192.6	744.7	22.5852	3.86	3.92	1.92	2.53	2.59	2.87	2.92	1	0.94	0	259.15	0.5	2.865	0.995
12.5605	753.628	2.01	1.87	-0.05	7689	6943.8	21422	4.4	-38.99	2.73	3.097	17.75	76.69	0.8832	0.8863	0.9861	0.8907	18.7	4.534	7192.2	745.2	22.5853	3.88	3.93	1.92	2.54	2.59	2.87	2.92	1	0.95	0	261.11	0.5	2.875	1.005
12.5938	755.628	2.02	1.87	-0.05	7689	6944.3	21423	4.5	-38.99	2.73	3.097	17.74	77.67	0.8832	0.8863	0.9862	0.8907	18.9	4.568	7192.6	744.7	22.5852	3.89	3.94	1.92	2.54	2.59	2.88	2.93	1.01	0.95	0	263.07	0.5	2.88	1.01
12.6271	757.627	1.99	1.87	-0.05	7689	6943.8	21422	4.4	-38.99	2.73	3.097	17.74	78.71	0.8832	0.8863	0.9861	0.8907	18.9	4.5	7192.2	745.2	22.5853	3.86	3.91	1.92	2.53	2.58	2.87	2.92	1	0.94	0	259.15	0.5	2.865	0.995
12.6604	759.627	2.01	1.87	-0.05	7688.4	6943.8	21421.4	4.4	-38.99	2.729	3.096	17.74	79.73	0.8831	0.8862	0.9861	0.8906	18.7	4.534	7192	744.5	22.5853	3.88	3.93	1.92	2.54	2.59	2.87	2.92	1	0.95	0	261.13	0.5	2.875	1.005
12.6938	761.627	1.98	1.87	-0.05	7689	6944.8	21424	4.4	-38.99	2.73	3.096	17.74	80.74	0.8832	0.8863	0.9862	0.8907	18.8	4.466	7192.9	744.2	22.5852	3.85	3.9	1.92	2.53	2.58	2.86	2.91	0.99	0.93	0	257.19	0.5	2.86	0.99
12.7271	763.627	1.98	1.86	-0.05	7688.6	6943.8	21421.7	4.4	-38.99	2.73	3.097	17.74	81.7	0.8833	0.8861	0.9861	0.8907	18.7	4.466	7192.1	744.8	22.5853	3.84	3.9	1.92	2.52	2.58	2.85	2.91	0.99	0.93	0	257.18	0.5	2.85	0.99
12.7604	765.627	1.98	1.86	-0.05	7688.7	6943.3	21420.7	4.4	-38.99	2.73	3.097	17.74	82.53	0.8832	0.8862	0.986	0.8907	18.6	4.466	7191.8	745.4	22.5853	3.84	3.9	1.92	2.52	2.58	2.85	2.91	0.99	0.93	0	257.18	0.5	2.85	0.99
12.7938	767.627	1.96	1.87	-0.05	7688.7	6944.3	21422.7	4.3	-38.99	2.73	3.097	17.74	83.63	0.8832	0.8862	0.9862	0.8907	18.9	4.432	7192.4	744.3	22.5852	3.83	3.88	1.92	2.52	2.57	2.85	2.9	0.98	0.93	0	255.23	0.5	2.85	0.98
12.8271	769.626	2.01	1.86	-0.05	7689	6944.3	21423	4.4	-38.98	2.73	3.097	17.73	84.65	0.8832	0.8863	0.9862	0.8907	18.9	4.534	7192.6	744.7	22.5852	3.87	3.92	1.92	2.53	2.58	2.87	2.92	1	0.95	0	261.09	0.5	2.865	1.005
12.8604	771.626	1.96	1.86	-0.05	7689	6943.8	21422	4.3	-38.99	2.73	3.097	17.73	85.65	0.8832	0.8863	0.9861	0.8907	18.6	4.432	7192.2	745.2	22.5853	3.83	3.88	1.92	2.52	2.57	2.85	2.9	0.98	0.93	0	255.21	0.5	2.845	0.98
12.8938	773.626	2.02	1.86	-0.05	7688.7	6944.8	21423.7	4.5	-38.99	2.73	3.097	17.72	86.62	0.8832	0.8862	0.9862	0.8907	18.6	4.568	7192.8	743.8	22.5852	3.89	3.93	1.91	2.54	2.59	2.88	2.92	1.01	0.95	0	263.07	0.5	2.875	1.01
12.9271	775.626	2.02	1.87	-0.05	7688.7	6944.3	21422.7	4.5	-38.98	2.73	3.097	17.72	87.47	0.8832	0.8862	0.9862	0.8907	18.9	4.568	7192.4	744.3	22.5852	3.89	3.94	1.92	2.54	2.59	2.88	2.93	1.01	0.95	0	263.08	0.5	2.88	1.01
12.9604	777.626	1.98	1.86	-0.05	7688.7	6943.3	21420.7	4.4	-38.98	2.73	3.097	17.72	88.36	0.8832	0.8862	0.986	0.8907	18.9	4.466	7191.8	745.4	22.5853	3.84	3.89	1.92	2.52	2.57	2.85	2.9	0.99	0.93	0	257.18	0.5	2.85	0.99
12.9938	779.626	1.98	1.86	-0.05	7689	6943.3	21421	4.4	-38.99	2.73	3.097	17.72	89.25	0.8832	0.8863	0.986	0.8907	18.7	4.466	7191.9	745.7	22.5853	3.84	3.89	1.92	2.52	2.57	2.85	2.9	0.99	0.93	0	257.17	0.5	2.85	0.99
13.0271	781.626	2.01	1.86	-0.05	7689	6943.8	21422	4.4	-38.98	2.73	3.097	17.71	90.13	0.8832	0.8863	0.9861	0.8907	18.6	4.534	7192.2	745.2	22.5853	3.87	3.92	1.92	2.53	2.58	2.87	2.92	1	0.95	0	261.09	0.5	2.865	1.005
13.0604	783.625	1.98	1.86	-0.05	7688.7	6943.8	21421.7	4.4	-38.99	2.73	3.097	17.71	90.79	0.8832	0.8862	0.9861	0.8907	18.7	4.466	7192.1	744.8	22.5853	3.84	3.89	1.92	2.52	2.57	2.85	2.9	0.99	0.93	0	257.18	0.5	2.85	0.99
13.0938	785.625	2.01	1.86	-0.05	7688.7	6943.3	21420.7	4.4	-38.99	2.731	3.097	17.7	90.86	0.8832	0.8862	0.986	0.8907	18.9	4.534	7191.8	745.4	22.5853	3.87	3.91	1.91	2.53	2.58	2.86	2.91	1	0.95	0	261.09	0.5	2.865	1.005
13.1271	787.625	1.99	1.86	-0.05	7688.7	6943.3	21420.7	4.4	-38.98	2.731	3.097	17.7	91.21	0.8832	0.8862	0.986	0.8907	18.9	4.5	7191.8	745.4	22.5853	3.85	3.9	1.91	2.52	2.57	2.86	2.9	1	0.94	0	259.13	0.5	2.855	0.995
13.1604	789.625	1.98	1.86	-0.05	7688.4	6942.3	21418.4	4.4	-38.98	2.73	3.097	17.7	91.67	0.8831	0.8862	0.9859	0.8906	18.7	4.466	7191	746	22.5853	3.84	3.88	1.91	2.52	2.57	2.85	2.89	0.99	0.93	0	257.18	0.5	2.85	0.99
13.1937	791.625	1.98	1.86	-0.05	7688.7	6942.8	21419.7	4.4	-38.99	2.731	3.099	17.7	92.05	0.8832	0.8862	0.9859	0.8907	18.6	4.466	7191.4	745.9	22.5853	3.84	3.89	1.91	2.52	2.57	2.85	2.9	0.99	0.93	0	257.17	0.5	2.85	0.99
13.2271	793.625	2.01	1.86	-0.05	7689	6942.8	21420.1	4.4	-38.99	2.73	3.098	17.7	92.79	0.8832	0.8863	0.9859	0.8907	18.6	4.534	7191.6	746.2	22.5853	3.86	3.91	1.91	2.52	2.57	2.86	2.91	1	0.95	0	261.06	0.5	2.86	1.005
13.2604	795.624	2.01	1.86	-0.05	7689	6942.3	21419.1	4.4	-38.99	2.73	3.097	17.7	93.57	0.8832	0.8863	0.9859	0.8907	18.7	4.534	7191.2	746.7	22.5853	3.86	3.91	1.91	2.52	2.57	2.86	2.91	1	0.95	0	261.06	0.5	2.86	1.005
13.2937	797.624	1.98	1.86	-0.05	7688.3	6942.3	21418.4	4.4	-38.99	2.73	3.098	17.69	94.4	0.8832	0.8861	0.9859	0.8906	18.6	4.465	7191	746	22.5853	3.83	3.88	1.9	2.51	2.56	2.84	2.89	0.99	0.93	0	257.16	0.5	2.845	0.99
13.3271	799.624	1.99	1.86	-0.05	7688.7	6942.8	21419.7	4.4	-38.99	2.73	3.098	17.7	95.25	0.8832	0.8862	0.9859	0.8907	18.6	4.5	7191.4	745.9	22.5853	3.85	3.89	1.9	2.52	2.57	2.85	2.9	1	0.94	0	259.11	0.5	2.855	0.995
13.3604	801.624	2.01	1.86	-0.04	7688	6942.3	21418.1	4.4	-38.99	2.731	3.097	17.69	95.93	0.8831	0.8861	0.9859	0.8906	18.9	4.534	7190.9	745.7	22.5853	3.86	3.9	1.9	2.52	2.57	2.86	2.9	1	0.95	0	261.1	0.5	2.86	1.005
13.3937	803.624	2.01	1.86	-0.04	7688.7	6941.8	21417.7	4.4	-38.98	2.73	3.098	17.69	96.62	0.8832	0.8862	0.9858	0.8907	18.4	4.534	7190.8	746.9	22.5854	3.86	3.9	1.9	2.52	2.57	2.86	2.9	1	0.95	0	261.07	0.5	2.86	1.005
13.4271	805.624	2.01	1.86	-0.05	7688.7	6941.8	21417.7	4.4	-38.98	2.73	3.098	17.69	97.39	0.8832	0.8862	0.9858	0.8907	18.6	4.534	7190.8	746.9	22.5854	3.86	3.91	1.9	2.52	2.57	2.86	2.91	1	0.95	0	261.07	0.5	2.86	1.005
13.4604	807.624	2.02	1.86	-0.05	7688.7	6941.8	21417.7	4.5	-38.98	2.73	3.097	17.69	98.24	0.8832	0.8862	0.9858	0.8907	18.7	4.568	7190.8	746.9	22.5854	3.88	3.93	1.91	2.53	2.58	2.87	2.92	1.01	0.95	0	263.04	0.5	2.87	1.01
13.4937	809.623	1.98	1.86	-0.05	7689	6942.8	21420.1	4.4	-38.99	2.73	3.098	17.69	98.93	0.8832	0.8863	0.9859	0.8907	18.6	4.465	7191.6	746.2	22.5853	3.83	3.88	1.9	2.51	2.56	2.84	2.89	0.99	0.93	0	257.14	0.5	2.845	0.99
13.5271	811.623	1.99	1.86	-0.05	7689.3	6942.3	21419.4	4.4	-38.99	2.731	3.098	17.69	99.28	0.8833	0.8863	0.9859	0.8907	18.7	4.5	7191.3	747	22.5853	3.85	3.9	1.91	2.52	2.57	2.85	2.9	1	0.94	0	259.09	0.5	2.855	0.995
13.5604	813.623	1.99	1.85	-0.05	7689	6942.3	21419.1	4.4	-38.98	2.732	3.097	17.7	99.82	0.8832	0.8863	0.9859	0.8907	19	4.499	7191.2	746.7	22.5853	3.84	3.89	1.9	2.52	2.56	2.85	2.89	1	0.94	0	259.09	0.5	2.845	0.995
13.5937	815.623	1.99	1.86	-0.05	7689	6942.3	21419	4.4	-38.99	2.73	3.098	17.69	100.4	0.8833	0.8862	0.9859	0.8907	18.4	4.5	7191.2	746.7	22.5853	3.85	3.89	1.9	2.52	2.57	2.85	2.9	1	0.94	0	259.1	0.5	2.855	0.995
13.6271	817.623	1.98	1.85	-0.05	7689	6941.8	21418	4.4	-38.99	2.73	3.099	17.7	101.12	0.8833	0.8862	0.9858	0.8907	18.3	4.465	7190.9	747.2	22.5854	3.83	3.87	1.9	2.51	2.56	2.84	2.89	0.99	0.93	0	257.12	0.5	2.84	0.99
13.6604	819.623	1.98	1.85	-0.05	7688.7	6941.8	21417.7	4.4	-39	2.73	3.099	17.7	101.9	0.8832	0.8862	0.9858	0.8907	18.5	4.465	7190.8	746.9	22.5854	3.82	3.88	1.9	2.51	2.56	2.83	2.89	0.99	0.93	0	257.12	0.5	2.835	0.99
13.6937	821.622	1.99	1.85	-0.05	7689	6942.3	21419.1	4.4	-39	2.73	3.099	17.7	102.67	0.8832	0.8863	0.9859	0.8907	18.5	4.499	7191.2	746.7	22.5853	3.84	3.89	1.9	2.52	2.57	2.85	2.9	1	0.94	0	259.09	0.5	2.845	0.995
13.727	823.622	1.99	1.85	-0.05	7689	6942.3	21419	4.4	-39	2.73	3.099	17.7	103.52	0.8833	0.8862	0.9859	0.8907	18.5	4.499	7191.2	746.7	22.5853	3.84	3.89	1.9	2.51	2.56	2.84	2.9	1	0.94	0	259.07	0.5	2.845	0.995
13.7604	825.622	1.96	1.84	-0.06	7689	6942.3	21419	4.3	-39	2.73	3.099	17.71	104.4	0.8833	0.8862	0.9859	0.8907	18.3	4.431	7191.2	746.7	22.5853	3.8	3.86	1.9	2.5	2.55	2.82	2.88	0.98	0.92	0	255.13	0.5	2.82	0.98
13.7937	827.622	1.99	1.85	-0.05	7688.3	6942.3	21418.4	4.4	-39.01	2.731	3.099	17.71	105.35	0.8832	0.8861	0.9859	0.8906	18.5	4.499	7191	746	22.5853	3.84	3.89	1.9	2.51	2.56	2.84	2.9	1	0.94	0	259.09	0.5	2.845	0.995
13.827	829.622	1.98	1.85	-0.06	7688.6	6942.3	21418.7	4.4	-39	2.73	3.099	17.72	106.3	0.8833	0.8861	0.9859	0.8907	18.3	4.465	7191.1	746.3	22.5853	3.82	3.88	1.9	2.51	2.56	2.83	2.89	0.99	0.93	0	257.12	0.5	2.835	0.99
13.8604	831.622	1.98	1.85	-0.05	7688	6942.3	21418.1	4.4	-39	2.731	3.099	17.71	107.17	0.8831	0.8861	0.9859	0.8906	18.6	4.465	7190.9	745.7	22.5853	3.82	3.88	1.9	2.51	2.56	2.83	2.89	0.99	0.93	0	257.14	0.5	2.835	0.99
13.8937	833.622	1.99	1.85	-0.05	7688.7	6942.3	21418.7	4.4	-39	2.731	3.099	17.71	108.1	0.8832	0.8862	0.9859	0.8907	18.5	4.499	7191.1	746.4	22.5853	3.84	3.89	1.9	2.51	2.56	2.84	2.9	1	0.94	0	259.08	0.5	2.845	0.995
13.927	835.621	1.98	1.84	-0.06	7688.6	6942.8	21419.7	4.4	-39.01	2.73	3.099	17.72	109.04	0.8833	0.8861	0.9859	0.8907	18.3	4.465	7191.4	745.8	22.5853	3.82	3.88	1.9	2.5	2.56	2.83	2.89	0.99	0.93	0	257.11	0.5	2.83	0.99
13.9604	837.621	1.99	1.85	-0.05	7688.3	6942.3	21418.4	4.4	-39	2.731	3.099	17.72	110.06	0.8832	0.8861	0.9859	0.8906	18.6	4.499	7191	746	22.5853	3.84	3.89	1.9	2.51	2.56	2.84	2.9	1	0.94	0	259.09	0.5	2.845	0.995
13.9937	839.621	1.99	1.85	-0.06	7688.7	6942.8	21419.7	4.4	-39	2.731	3.098	17.71	111.13	0.8832	0.8862	0.9859	0.8907	18.7	4.499	7191.4	745.9	22.5853	3.84	3.9	1.9	2.51	2.57	2.84	2.9	1	0.94	0	259.08	0.5	2.845	0.995
14.027	841.621	1.99	1.84	-0.06	7689	6943.3	21421	4.4	-39.01	2.732	3.1	17.72	111.96	0.8832	0.8863	0.986	0.8907	18.5	4.499	7191.9	745.7	22.5853	3.83	3.9	1.9	2.51	2.57	2.84	2.9	1	0.94	0	259.06	0.5	2.835	0.995
14.0603	843.621	1.98	1.85	-0.06	7689	6942.8	21420.1	4.4	-39.01	2.732	3.1	17.72	112.77	0.8832	0.8863	0.9859	0.8907	18.5	4.465	7191.6	746.2	22.5853	3.82	3.88	1.9	2.51	2.56	2.83	2.89	0.99	0.93	0	257.11	0.5	2.835	0.99
14.0937	845.621	1.98	1.85	-0.06	7688.3	6942.8	21419.4	4.4	-39.01	2.73	3.099	17.72	113.67	0.8832	0.8861	0.9859	0.8906	18.3	4.465	7191.3	745.5	22.5853	3.82	3.88	1.9	2.51	2.56	2.83	2.89	0.99	0.93	0	257.13	0.5	2.835	0.99
14.127	847.621	1.99	1.85	-0.06	7689	6943.3	21421	4.4	-39.01	2.732	3.099	17.72	114.63	0.8833	0.8862	0.986	0.8907	18.6	4.499	7191.9	745.7	22.5853	3.84	3.9	1.9	2.51	2.57	2.84	2.9	1	0.94	0	259.07	0.5	2.845	0.995
14.1603	849.62	1.99	1.85	-0.06	7689	6943.3	21421	4.4	-39	2.731	3.099	17.72	115.4	0.8832	0.8863	0.986	0.8907	18.5	4.499	7191.9	745.7	22.5853	3.84	3.9	1.9	2.51	2.57	2.84	2.9	1	0.94	0	259.07	0.5	2.845	0.995
14.1937	851.62	1.99	1.85	-0.05	7688.7	6943.3	21420.7	4.4	-39	2.731	3.1	17.72	116.19	0.8832	0.8862	0.986	0.8907	18.4	4.499	7191.8	745.4	22.5853	3.84	3.89	1.9	2.51	2.56	2.84	2.9	1	0.94	0	259.08	0.5	2.845	0.995
14.227	853.62	1.99	1.84	-0.05	7689	6943.3	21421	4.4	-39	2.732	3.1	17.72	116.78	0.8832	0.8863	0.986	0.8907	18.5	4.499	7191.9	745.7	22.5853	3.83	3.89	1.9	2.51	2.56	2.84	2.89	1	0.94	0	259.06	0.5	2.835	0.995
14.2603	855.62	1.96	1.85	-0.05	7689	6943.8	21422	4.3	-39	2.732	3.099	17.72	117.64	0.8832	0.8863	0.9861	0.8907	18.6	4.431	7192.2	745.2	22.5853	3.81	3.86	1.9	2.5	2.55	2.83	2.88	0.98	0.92	0	255.15	0.5	2.83	0.98
14.2937	857.62	1.98	1.85	-0.06	7688.7	6943.8	21421.7	4.4	-39.01	2.732	3.099	17.72	118.6	0.8832	0.8862	0.9861	0.8907	18.6	4.465	7192.1	744.8	22.5853	3.82	3.88	1.9	2.51	2.56	2.83	2.89	0.99	0.93	0	257.12	0.5	2.835	0.99
14.327	859.62	1.99	1.84	-0.06	7689	6943.8	21422	4.4	-39	2.732	3.099	17.72	119.55	0.8832	0.8863	0.9861	0.8907	18.6	4.499	7192.2	745.2	22.5853	3.83	3.89	1.9	2.51	2.56	2.84	2.9	1	0.94	0	259.06	0.5	2.835	0.995
14.3603	861.619	1.99	1.84	-0.06	7688.3	6943.3	21420.3	4.4	-39	2.732	3.099	17.72	120.02	0.8832	0.8861	0.986	0.8906	18.8	4.499	7191.7	745	22.5853	3.83	3.89	1.9	2.51	2.56	2.84	2.9	1	0.94	0	259.08	0.5	2.835	0.995
14.3937	863.619	1.99	1.85	-0.05	7689	6943.8	21422	4.4	-39	2.732	3.099	17.72	120	0.8832	0.8863	0.9861	0.8907	18.8	4.499	7192.2	745.2	22.5853	3.84	3.89	1.9	2.51	2.56	2.84	2.9	1	0.94	0	259.07	0.5	2.845	0.995
14.427	865.619	1.99	1.85	-0.05	7689	6943.8	21422	4.4	-39	2.732	3.101	17.72	120.02	0.8832	0.8863	0.9861	0.8907	18.5	4.499	7192.2	745.2	22.5853	3.84	3.89	1.9	2.51	2.56	2.84	2.9	1	0.94	0	259.07	0.5	2.845	0.995
14.4603	867.619	1.98	1.84	-0.06	7688.7	6943.8	21421.7	4.4	-39	2.732	3.099	17.72	120.55	0.8832	0.8862	0.9861	0.8907	18.6	4.465	7192.1	744.8	22.5853	3.82	3.88	1.9	2.5	2.56	2.83	2.89	0.99	0.93	0	257.11	0.5	2.83	0.99
14.4937	869.619	2.01	1.85	-0.06	7688.7	6944.3	21422.7	4.4	-39	2.732	3.099	17.72	121.18	0.8832	0.8862	0.9862	0.8907	18.6	4.533	7192.4	744.3	22.5852	3.85	3.91	1.9	2.52	2.57	2.85	2.91	1	0.95	0	261.04	0.5	2.85	1.005
14.527	871.619	2.01	1.84	-0.06	7689	6944.3	21423	4.4	-39	2.731	3.1	17.72	121.93	0.8833	0.8862	0.9862	0.8907	18.4	4.533	7192.6	744.7	22.5852	3.85	3.91	1.9	2.51	2.57	2.85	2.9	1	0.95	0	261.02	0.5	2.845	1.005
14.5603	873.619	1.99	1.84	-0.06	7689	6943.8	21422	4.4	-39.01	2.731	3.099	17.72	122.62	0.8833	0.8862	0.9861	0.8907	18.5	4.499	7192.2	745.2	22.5853	3.83	3.89	1.9	2.51	2.56	2.84	2.9	1	0.94	0	259.06	0.5	2.835	0.995
14.5936	875.618	1.96	1.84	-0.06	7688.7	6943.8	21421.7	4.3	-39	2.731	3.099	17.72	123.43	0.8832	0.8862	0.9861	0.8907	18.5	4.431	7192.1	744.8	22.5853	3.8	3.86	1.9	2.5	2.55	2.82	2.88	0.98	0.92	0	255.14	0.5	2.82	0.98
14.627	877.618	1.99	1.84	-0.05	7689	6943.8	21422	4.4	-39.01	2.732	3.099	17.72	124.03	0.8833	0.8862	0.9861	0.8907	18.6	4.498	7192.2	745.2	22.5853	3.83	3.88	1.89	2.5	2.56	2.83	2.89	1	0.94	0	259.04	0.5	2.835	0.995
14.6603	879.618	1.96	1.84	-0.06	7688.4	6944.3	21422.4	4.3	-39.01	2.732	3.099	17.72	124.7	0.8831	0.8862	0.9862	0.8906	18.6	4.43	7192.3	744	22.5852	3.8	3.86	1.9	2.49	2.55	2.82	2.88	0.98	0.92	0	255.14	0.5	2.82	0.98
14.6936	881.618	1.98	1.84	-0.06	7689	6944.3	21423	4.4	-39.01	2.732	3.101	17.72	125.43	0.8832	0.8863	0.9862	0.8907	18.4	4.465	7192.6	744.7	22.5852	3.82	3.88	1.9	2.5	2.56	2.83	2.89	0.99	0.93	0	257.09	0.5	2.83	0.99
14.727	883.618	1.98	1.83	-0.06	7688.7	6944.3	21422.7	4.4	-39.01	2.731	3.1	17.72	126.4	0.8832	0.8862	0.9862	0.8907	18.4	4.464	7192.4	744.3	22.5852	3.81	3.87	1.9	2.49	2.55	2.82	2.88	0.99	0.93	0	257.08	0.5	2.82	0.99
14.7603	885.618	1.98	1.84	-0.06	7688	6944.3	21422	4.4	-39.01	2.731	3.1	17.72	127.45	0.8831	0.8861	0.9862	0.8906	18.4	4.464	7192.2	743.7	22.5852	3.81	3.88	1.9	2.5	2.56	2.83	2.89	0.99	0.93	0	257.11	0.5	2.825	0.99
14.7936	887.617	1.96	1.84	-0.06	7688.7	6944.8	21423.7	4.3	-39.01	2.73	3.1	17.72	128.44	0.8832	0.8862	0.9862	0.8907	18.2	4.43	7192.8	743.8	22.5852	3.8	3.86	1.9	2.49	2.55	2.82	2.88	0.98	0.92	0	255.13	0.5	2.82	0.98
14.827	889.617	1.98	1.84	-0.06	7689	6943.3	21421	4.4	-39.01	2.731	3.101	17.72	129.3	0.8832	0.8863	0.986	0.8907	18.2	4.464	7191.9	745.7	22.5853	3.81	3.87	1.9	2.5	2.55	2.83	2.88	0.99	0.93	0	257.08	0.5	2.825	0.99
14.8603	891.617	2.01	1.84	-0.06	7688.4	6943.3	21420.4	4.4	-39	2.731	3.1	17.72	130.12	0.8831	0.8862	0.986	0.8906	18.4	4.533	7191.7	745	22.5853	3.84	3.9	1.9	2.51	2.56	2.84	2.9	1	0.95	0	261.02	0.5	2.84	1.005
14.8936	893.617	1.98	1.84	-0.05	7688.7	6943.8	21421.7	4.4	-39	2.731	3.101	17.71	130.9	0.8832	0.8862	0.9861	0.8907	18.1	4.464	7192.1	744.8	22.5853	3.81	3.87	1.89	2.5	2.55	2.83	2.88	0.99	0.93	0	257.09	0.5	2.825	0.99
14.9269	895.617	1.99	1.83	-0.06	7689	6943.8	21422	4.4	-39	2.731	3.101	17.71	131.78	0.8833	0.8862	0.9861	0.8907	18.2	4.498	7192.2	745.2	22.5853	3.82	3.88	1.89	2.5	2.55	2.83	2.89	1	0.94	0	259.03	0.5	2.825	0.995
14.9603	897.617	1.99	1.84	-0.06	7688.3	6943.8	21421.4	4.4	-39	2.731	3.1	17.71	132.65	0.8832	0.8861	0.9861	0.8906	18.4	4.498	7192	744.5	22.5853	3.83	3.89	1.9	2.5	2.56	2.83	2.89	1	0.94	0	259.06	0.5	2.835	0.995
14.9936	899.617	1.98	1.84	-0.05	7688.7	6944.3	21422.7	4.4	-39	2.73	3.1	17.7	133.52	0.8832	0.8862	0.9862	0.8907	18.2	4.464	7192.4	744.3	22.5852	3.81	3.87	1.89	2.5	2.55	2.83	2.88	0.99	0.93	0	257.09	0.5	2.825	0.99
15.0269	901.616	1.98	1.83	-0.06	7688.7	6943.8	21421.7	4.4	-39	2.731	3.101	17.71	134.34	0.8832	0.8862	0.9861	0.8907	18.2	4.464	7192.1	744.8	22.5853	3.81	3.87	1.89	2.49	2.55	2.82	2.88	0.99	0.93	0	257.08	0.5	2.82	0.99
15.0603	903.616	2.01	1.83	-0.06	7689	6943.8	21422	4.4	-39.01	2.732	3.101	17.71	135.23	0.8832	0.8863	0.9861	0.8907	18.4	4.532	7192.2	745.2	22.5853	3.84	3.9	1.89	2.5	2.56	2.84	2.89	1	0.95	0	260.99	0.5	2.835	1.005
15.0936	905.616	1.98	1.83	-0.06	7688.3	6943.8	21421.3	4.4	-39.01	2.731	3.101	17.71	136.19	0.8833	0.8861	0.9861	0.8906	18.2	4.464	7192	744.5	22.5853	3.81	3.87	1.89	2.49	2.55	2.82	2.88	0.99	0.93	0	257.09	0.5	2.82	0.99
15.1269	907.616	2.01	1.83	-0.06	7688.7	6943.8	21421.7	4.4	-39.01	2.732	3.101	17.71	136.91	0.8832	0.8862	0.9861	0.8907	18.5	4.532	7192.1	744.8	22.5853	3.84	3.9	1.9	2.5	2.56	2.84	2.9	1	0.95	0	261	0.5	2.835	1.005
15.1603	909.616	1.99	1.83	-0.05	7688.7	6944.3	21422.7	4.4	-39.01	2.732	3.1	17.7	137.6	0.8832	0.8862	0.9862	0.8907	18.5	4.498	7192.4	744.3	22.5852	3.82	3.88	1.89	2.5	2.55	2.83	2.88	1	0.94	0	259.04	0.5	2.825	0.995
15.1936	911.616	1.99	1.83	-0.06	7688.7	6943.8	21421.7	4.4	-39.01	2.732	3.1	17.7	138.52	0.8832	0.8862	0.9861	0.8907	18.5	4.498	7192.1	744.8	22.5853	3.82	3.88	1.89	2.5	2.55	2.83	2.89	1	0.94	0	259.04	0.5	2.825	0.995
15.2269	913.616	1.98	1.83	-0.06	7689	6943.8	21422	4.4	-39.01	2.732	3.101	17.7	139.31	0.8832	0.8863	0.9861	0.8907	18.3	4.464	7192.2	745.2	22.5853	3.81	3.87	1.9	2.49	2.55	2.82	2.88	0.99	0.93	0	257.06	0.5	2.82	0.99
15.2603	915.615	1.96	1.83	-0.06	7688.3	6943.8	21421.4	4.3	-39	2.732	3.101	17.7	139.79	0.8832	0.8861	0.9861	0.8906	18.4	4.43	7192	744.5	22.5853	3.79	3.85	1.89	2.49	2.54	2.81	2.87	0.98	0.92	0	255.13	0.5	2.81	0.98
15.2936	917.615	2.01	1.83	-0.06	7689	6944.3	21423	4.4	-39	2.732	3.101	17.7	140.48	0.8832	0.8863	0.9862	0.8907	18.4	4.532	7192.6	744.7	22.5852	3.84	3.9	1.89	2.5	2.56	2.84	2.89	1	0.95	0	260.99	0.5	2.835	1.005
15.3269	919.615	2.01	1.83	-0.06	7689	6943.8	21422	4.4	-39.01	2.731	3.101	17.7	141.64	0.8832	0.8863	0.9861	0.8907	18.2	4.532	7192.2	745.2	22.5853	3.83	3.89	1.89	2.5	2.56	2.83	2.89	1	0.95	0	260.97	0.5	2.83	1.005
15.3603	921.615	1.98	1.83	-0.06	7688.3	6943.3	21420.3	4.4	-39	2.73	3.101	17.69	142.8	0.8832	0.8861	0.986	0.8906	18.1	4.464	7191.7	745	22.5853	3.81	3.87	1.9	2.49	2.55	2.82	2.88	0.99	0.93	0	257.09	0.5	2.82	0.99
15.3936	923.615	1.99	1.82	-0.05	7689.3	6943.8	21422.3	4.4	-39	2.731	3.1	17.69	143.87	0.8833	0.8863	0.9861	0.8907	18.4	4.498	7192.3	745.5	22.5853	3.81	3.87	1.88	2.49	2.54	2.82	2.87	1	0.94	0	258.98	0.5	2.815	0.995
15.4269	925.615	2.01	1.83	-0.05	7689	6943.3	21421	4.4	-39	2.731	3.101	17.69	144.61	0.8833	0.8862	0.986	0.8907	18.2	4.532	7191.9	745.7	22.5853	3.83	3.89	1.88	2.5	2.55	2.83	2.89	1	0.95	0	260.97	0.5	2.83	1.005
15.4602	927.614	1.98	1.83	-0.05	7688.7	6943.3	21420.7	4.4	-39	2.731	3.1	17.69	145.48	0.8832	0.8862	0.986	0.8907	18.4	4.464	7191.8	745.4	22.5853	3.8	3.86	1.88	2.49	2.54	2.82	2.87	0.99	0.93	0	257.06	0.5	2.815	0.99
15.4936	929.614	1.98	1.82	-0.06	7688.6	6943.8	21421.7	4.4	-39	2.731	3.1	17.68	146.47	0.8833	0.8861	0.9861	0.8907	18.4	4.464	7192.1	744.8	22.5853	3.8	3.86	1.89	2.48	2.54	2.81	2.87	0.99	0.93	0	257.05	0.5	2.81	0.99
15.5269	931.614	2.01	1.82	-0.06	7688.7	6943.3	21420.7	4.4	-39	2.731	3.1	17.68	147.44	0.8832	0.8862	0.986	0.8907	18.4	4.531	7191.8	745.4	22.5853	3.83	3.88	1.88	2.49	2.55	2.82	2.88	1	0.95	0	260.95	0.5	2.825	1.005
15.5602	933.614	1.98	1.82	-0.06	7688.7	6942.8	21419.7	4.4	-39.01	2.73	3.1	17.68	148.59	0.8832	0.8862	0.9859	0.8907	18.2	4.463	7191.4	745.9	22.5853	3.79	3.85	1.88	2.48	2.54	2.81	2.87	0.99	0.93	0	257.03	0.5	2.805	0.99
15.5936	935.614	2.01	1.82	-0.06	7689	6942.8	21420.1	4.4	-39	2.73	3.099	17.67	149.66	0.8832	0.8863	0.9859	0.8907	18.3	4.532	7191.6	746.2	22.5853	3.83	3.89	1.89	2.49	2.55	2.83	2.89	1	0.95	0	260.96	0.5	2.825	1.005
15.6269	937.614	2.01	1.82	-0.06	7689	6942.8	21420.1	4.4	-39.01	2.732	3.101	17.68	150.67	0.8833	0.8862	0.9859	0.8907	18.3	4.532	7191.5	746.2	22.5853	3.83	3.89	1.88	2.49	2.55	2.83	2.88	1	0.95	0	260.96	0.5	2.825	1.005
15.6602	939.614	1.98	1.81	-0.06	7688.7	6942.3	21418.7	4.4	-39	2.732	3.101	17.68	151.65	0.8832	0.8862	0.9859	0.8907	18.4	4.463	7191.1	746.4	22.5853	3.79	3.85	1.87	2.47	2.53	2.8	2.86	0.99	0.93	0	257.01	0.5	2.8	0.99
15.6936	941.613	2.02	1.83	-0.06	7689	6942.8	21420.1	4.5	-39.01	2.732	3.101	17.68	152.61	0.8833	0.8862	0.9859	0.8907	18.3	4.566	7191.5	746.2	22.5853	3.85	3.91	1.89	2.5	2.56	2.84	2.9	1.01	0.95	0	262.93	0.5	2.84	1.01
15.7269	943.613	2.01	1.82	-0.06	7689	6942.8	21420.1	4.4	-39	2.73	3.101	17.68	153.66	0.8832	0.8863	0.9859	0.8907	18.1	4.531	7191.6	746.2	22.5853	3.83	3.89	1.88	2.49	2.55	2.82	2.88	1	0.95	0	260.94	0.5	2.825	1.005
15.7602	945.613	1.99	1.81	-0.06	7689	6942.8	21420.1	4.4	-39.01	2.731	3.101	17.68	154.63	0.8832	0.8863	0.9859	0.8907	18.2	4.497	7191.6	746.2	22.5853	3.81	3.86	1.87	2.48	2.54	2.81	2.87	1	0.94	0	258.96	0.5	2.81	0.995
15.7936	947.613	1.99	1.82	-0.05	7689	6942.8	21420.1	4.4	-39	2.732	3.102	17.67	154.88	0.8833	0.8862	0.9859	0.8907	18.1	4.497	7191.5	746.2	22.5853	3.81	3.86	1.87	2.48	2.54	2.81	2.87	1	0.94	0	258.98	0.5	2.815	0.995
15.8269	949.613	2.01	1.82	-0.06	7688.3	6942.3	21418.4	4.4	-39	2.732	3.102	17.67	154.82	0.8832	0.8861	0.9859	0.8906	18.1	4.531	7191	746	22.5853	3.83	3.88	1.88	2.49	2.55	2.82	2.88	1	0.95	0	260.96	0.5	2.825	1.005
15.8602	951.613	2.01	1.81	-0.06	7689	6941.8	21418	4.4	-39.01	2.732	3.102	17.68	154.96	0.8833	0.8862	0.9858	0.8907	18.3	4.531	7190.9	747.2	22.5854	3.82	3.88	1.87	2.48	2.54	2.81	2.88	1	0.95	0	260.91	0.5	2.815	1.005
15.8935	953.612	2.02	1.82	-0.06	7688.7	6942.3	21418.7	4.5	-39.01	2.732	3.103	17.68	154.93	0.8832	0.8862	0.9859	0.8907	18.1	4.566	7191.1	746.4	22.5853	3.84	3.9	1.88	2.49	2.56	2.83	2.89	1.01	0.95	0	262.91	0.5	2.83	1.01
15.9269	955.612	2.01	1.82	-0.06	7689	6942.8	21420.1	4.4	-39.01	2.732	3.103	17.68	154.88	0.8832	0.8863	0.9859	0.8907	18.1	4.531	7191.6	746.2	22.5853	3.83	3.89	1.88	2.49	2.55	2.82	2.88	1	0.95	0	260.94	0.5	2.825	1.005
15.9602	957.612	1.99	1.81	-0.06	7688.7	6941.8	21417.7	4.4	-39.01	2.732	3.103	17.68	154.84	0.8832	0.8862	0.9858	0.8907	18	4.497	7190.8	746.9	22.5854	3.81	3.87	1.88	2.48	2.54	2.81	2.87	1	0.94	0	258.98	0.5	2.81	0.995
15.9935	959.612	1.98	1.82	-0.06	7689	6942.8	21420.1	4.4	-39.01	2.732	3.103	17.68	155.06	0.8833	0.8862	0.9859	0.8907	18	4.463	7191.5	746.2	22.5853	3.79	3.86	1.88	2.48	2.54	2.81	2.87	0.99	0.93	0	257.02	0.5	2.805	0.99
16.0269	961.612	1.98	1.81	-0.06	7688.7	6942.3	21418.7	4.4	-39.01	2.731	3.102	17.68	156.11	0.8832	0.8862	0.9859	0.8907	18	4.463	7191.1	746.4	22.5853	3.79	3.85	1.88	2.47	2.54	2.8	2.86	0.99	0.93	0	257.01	0.5	2.8	0.99
16.0602	963.612	2.01	1.81	-0.06	7688.7	6942.3	21418.7	4.4	-39.01	2.732	3.102	17.68	157.46	0.8832	0.8862	0.9859	0.8907	18.1	4.531	7191.1	746.4	22.5853	3.82	3.88	1.88	2.48	2.55	2.82	2.88	1	0.95	0	260.94	0.5	2.815	1.005
16.0935	965.612	1.96	1.81	-0.06	7688.3	6942.3	21418.4	4.3	-39.01	2.732	3.103	17.68	158.29	0.8832	0.8861	0.9859	0.8906	18	4.429	7191	746	22.5853	3.78	3.83	1.87	2.47	2.53	2.79	2.85	0.98	0.92	0	255.06	0.5	2.795	0.98
16.1269	967.611	1.99	1.82	-0.06	7688.6	6942.8	21419.7	4.4	-39.01	2.732	3.103	17.68	158.57	0.8833	0.8861	0.9859	0.8907	18.1	4.497	7191.4	745.8	22.5853	3.81	3.87	1.88	2.48	2.55	2.81	2.88	1	0.94	0	258.99	0.5	2.815	0.995
16.1602	969.611	1.98	1.81	-0.06	7689	6942.3	21419.1	4.4	-39.01	2.733	3.103	17.68	158.54	0.8832	0.8863	0.9859	0.8907	18.3	4.463	7191.2	746.7	22.5853	3.79	3.85	1.87	2.47	2.53	2.8	2.86	0.99	0.93	0	256.99	0.5	2.8	0.99
16.1935	971.611	1.99	1.81	-0.07	7688.7	6942.3	21418.7	4.4	-39.02	2.733	3.104	17.7	158.47	0.8832	0.8862	0.9859	0.8907	18	4.497	7191.1	746.4	22.5853	3.8	3.87	1.88	2.47	2.54	2.8	2.87	1	0.94	0	258.96	0.5	2.805	0.995
16.2268	973.611	2.01	1.8	-0.07	7689	6942.3	21419	4.4	-39.03	2.734	3.105	17.69	158.42	0.8833	0.8862	0.9859	0.8907	18.1	4.531	7191.2	746.7	22.5853	3.81	3.88	1.88	2.47	2.54	2.81	2.88	1	0.95	0	260.9	0.5	2.805	1.005
16.2602	975.611	1.98	1.81	-0.07	7688.3	6942.3	21418.4	4.4	-39.02	2.734	3.104	17.69	158.38	0.8832	0.8861	0.9859	0.8906	18.2	4.463	7191	746	22.5853	3.79	3.85	1.88	2.47	2.53	2.8	2.86	0.99	0.93	0	257.01	0.5	2.8	0.99
16.2935	977.611	1.96	1.81	-0.07	7688.7	6942.8	21419.7	4.3	-39.02	2.734	3.103	17.69	158.35	0.8832	0.8862	0.9859	0.8907	18.5	4.429	7191.4	745.9	22.5853	3.77	3.84	1.88	2.46	2.53	2.79	2.86	0.98	0.92	0	255.04	0.5	2.79	0.98
16.3269	979.611	1.99	1.81	-0.07	7689.3	6942.3	21419.4	4.4	-39.03	2.734	3.105	17.69	158.4	0.8833	0.8863	0.9859	0.8907	18.1	4.497	7191.3	747	22.5853	3.8	3.87	1.88	2.47	2.54	2.8	2.87	1	0.94	0	258.94	0.5	2.805	0.995
16.3602	981.61	1.99	1.81	-0.07	7689	6942.3	21419.1	4.4	-39.03	2.732	3.104	17.7	159	0.8832	0.8863	0.9859	0.8907	17.9	4.497	7191.2	746.7	22.5853	3.8	3.87	1.88	2.47	2.54	2.8	2.88	1	0.94	0	258.95	0.5	2.805	0.995
16.3935	983.61	1.99	1.81	-0.06	7688.3	6942.8	21419.4	4.4	-39.02	2.733	3.104	17.7	159.58	0.8832	0.8861	0.9859	0.8906	18	4.497	7191.3	745.5	22.5853	3.8	3.86	1.87	2.47	2.54	2.8	2.87	1	0.94	0	258.97	0.5	2.805	0.995
16.4268	985.61	1.99	1.81	-0.07	7689	6942.8	21420.1	4.4	-39.02	2.734	3.104	17.7	159.68	0.8833	0.8862	0.9859	0.8907	18.2	4.497	7191.5	746.2	22.5853	3.81	3.87	1.88	2.48	2.54	2.81	2.88	1	0.94	0	258.97	0.5	2.81	0.995
16.4602	987.61	1.99	1.81	-0.07	7688.6	6942.8	21419.7	4.4	-39.03	2.734	3.105	17.7	159.68	0.8833	0.8861	0.9859	0.8907	18.1	4.497	7191.4	745.8	22.5853	3.8	3.87	1.88	2.47	2.54	2.8	2.87	1	0.94	0	258.96	0.5	2.805	0.995
16.4935	989.61	1.99	1.81	-0.07	7689	6943.3	21421	4.4	-39.03	2.734	3.104	17.7	159.78	0.8834	0.8861	0.986	0.8907	18.2	4.497	7191.9	745.6	22.5853	3.8	3.87	1.88	2.47	2.54	2.8	2.88	1	0.94	0	258.95	0.5	2.805	0.995
16.5268	991.61	1.99	1.81	-0.07	7689	6942.3	21419	4.4	-39.02	2.733	3.105	17.7	160.34	0.8833	0.8862	0.9859	0.8907	17.9	4.497	7191.2	746.7	22.5853	3.8	3.87	1.88	2.47	2.54	2.8	2.88	1	0.94	0	258.95	0.5	2.805	0.995
16.5602	993.609	2.01	1.8	-0.08	7688.7	6942.8	21419.7	4.4	-39.03	2.734	3.104	17.71	160.43	0.8832	0.8862	0.9859	0.8907	18.2	4.531	7191.4	745.9	22.5853	3.81	3.89	1.88	2.47	2.55	2.81	2.88	1	0.95	0	260.91	0.5	2.805	1.005
16.5935	995.609	1.99	1.81	-0.07	7689	6943.8	21422	4.4	-39.03	2.734	3.104	17.7	160.67	0.8833	0.8862	0.9861	0.8907	18.2	4.497	7192.2	745.2	22.5853	3.8	3.87	1.88	2.47	2.54	2.8	2.87	1	0.94	0	258.95	0.5	2.805	0.995
16.6268	997.609	1.96	1.8	-0.07	7689	6943.3	21421	4.3	-39.04	2.734	3.105	17.71	161.52	0.8833	0.8862	0.986	0.8907	18.1	4.428	7191.9	745.7	22.5853	3.77	3.84	1.88	2.46	2.53	2.79	2.86	0.98	0.92	0	255.01	0.5	2.785	0.98
16.6602	999.609	2.01	1.8	-0.07	7689	6942.8	21420.1	4.4	-39.04	2.734	3.105	17.71	162.35	0.8833	0.8862	0.9859	0.8907	18.1	4.53	7191.5	746.2	22.5853	3.81	3.88	1.87	2.47	2.54	2.8	2.87	1	0.95	0	260.88	0.5	2.805	1.005
16.6935	1001.61	1.99	1.8	-0.07	7689	6943.8	21422	4.4	-39.03	2.734	3.104	17.71	163.19	0.8833	0.8862	0.9861	0.8907	18.2	4.497	7192.2	745.2	22.5853	3.8	3.87	1.88	2.47	2.54	2.8	2.87	1	0.94	0	258.94	0.5	2.8	0.995
16.7268	1003.61	1.99	1.81	-0.08	7688.7	6943.8	21421.7	4.4	-39.03	2.733	3.104	17.71	163.61	0.8832	0.8862	0.9861	0.8907	18	4.497	7192.1	744.8	22.5853	3.8	3.88	1.89	2.47	2.55	2.8	2.88	1	0.94	0	258.96	0.5	2.805	0.995
16.7602	1005.61	1.98	1.81	-0.07	7688.7	6943.3	21420.7	4.4	-39.03	2.734	3.104	17.71	164.01	0.8832	0.8862	0.986	0.8907	18.2	4.463	7191.8	745.4	22.5853	3.79	3.86	1.88	2.47	2.54	2.8	2.87	0.99	0.93	0	257	0.5	2.8	0.99
16.7935	1007.61	2.01	1.8	-0.07	7689	6943.3	21421	4.4	-39.03	2.732	3.103	17.71	165.15	0.8833	0.8862	0.986	0.8907	18	4.531	7191.9	745.7	22.5853	3.81	3.88	1.87	2.47	2.54	2.81	2.87	1	0.95	0	260.9	0.5	2.805	1.005
16.8268	1009.61	1.99	1.81	-0.07	7689.3	6943.3	21421.3	4.4	-39.03	2.732	3.103	17.71	166.42	0.8834	0.8862	0.986	0.8907	18	4.497	7192	746	22.5853	3.8	3.87	1.88	2.47	2.54	2.8	2.88	1	0.94	0	258.94	0.5	2.805	0.995
16.8602	1011.61	2.01	1.81	-0.07	7688.3	6943.8	21421.4	4.4	-39.02	2.732	3.103	17.71	167.63	0.8832	0.8861	0.9861	0.8906	18	4.531	7192	744.5	22.5853	3.82	3.89	1.88	2.48	2.55	2.81	2.88	1	0.95	0	260.94	0.5	2.815	1.005
16.8935	1013.61	1.98	1.81	-0.06	7688.6	6943.8	21421.6	4.4	-39.02	2.732	3.103	17.7	168.81	0.8834	0.8861	0.9861	0.8906	17.9	4.463	7192.1	744.8	22.5853	3.79	3.85	1.87	2.47	2.53	2.8	2.86	0.99	0.93	0	257	0.5	2.8	0.99
16.9268	1015.61	2.02	1.8	-0.07	7689	6943.8	21422	4.5	-39.02	2.732	3.103	17.7	169.59	0.8833	0.8862	0.9861	0.8907	18	4.565	7192.2	745.2	22.5853	3.83	3.9	1.88	2.48	2.55	2.82	2.89	1.01	0.95	0	262.86	0.5	2.815	1.01
16.9602	1017.61	1.99	1.8	-0.07	7688.7	6943.8	21421.7	4.4	-39.02	2.733	3.104	17.7	169.6	0.8832	0.8862	0.9861	0.8907	18	4.497	7192.1	744.8	22.5853	3.8	3.86	1.87	2.47	2.54	2.8	2.87	1	0.94	0	258.95	0.5	2.8	0.995
16.9935	1019.61	1.98	1.8	-0.08	7688.3	6943.8	21421.3	4.4	-39.03	2.734	3.104	17.71	169.51	0.8833	0.8861	0.9861	0.8906	18.2	4.463	7192	744.5	22.5853	3.78	3.86	1.88	2.46	2.54	2.79	2.87	0.99	0.93	0	257	0.5	2.79	0.99
17.0268	1021.61	2.01	1.8	-0.07	7688.7	6943.3	21420.7	4.4	-39.03	2.734	3.105	17.71	169.41	0.8832	0.8862	0.986	0.8907	18.1	4.531	7191.8	745.4	22.5853	3.81	3.88	1.88	2.47	2.54	2.81	2.88	1	0.95	0	260.91	0.5	2.805	1.005
17.0602	1023.61	1.98	1.8	-0.07	7688.6	6943.3	21420.7	4.4	-39.03	2.734	3.105	17.71	169.34	0.8833	0.8861	0.986	0.8907	18.1	4.463	7191.8	745.3	22.5853	3.78	3.85	1.88	2.46	2.53	2.79	2.86	0.99	0.93	0	256.99	0.5	2.79	0.99
17.0935	1025.61	1.98	1.8	-0.07	7688.3	6943.3	21420.3	4.4	-39.03	2.734	3.105	17.71	169.3	0.8833	0.8861	0.986	0.8906	17.9	4.463	7191.6	745	22.5853	3.78	3.85	1.88	2.46	2.53	2.79	2.86	0.99	0.93	0	257	0.5	2.79	0.99
17.1268	1027.61	1.96	1.8	-0.08	7688.6	6943.3	21420.7	4.3	-39.03	2.734	3.105	17.71	169.28	0.8833	0.8861	0.986	0.8907	18.1	4.428	7191.8	745.3	22.5853	3.77	3.84	1.88	2.46	2.53	2.79	2.86	0.98	0.92	0	255.02	0.5	2.785	0.98
17.1602	1029.61	1.98	1.8	-0.07	7688.7	6943.3	21420.7	4.4	-39.03	2.734	3.105	17.71	169.27	0.8832	0.8862	0.986	0.8907	17.9	4.462	7191.8	745.4	22.5853	3.78	3.85	1.87	2.46	2.53	2.79	2.86	0.99	0.93	0	256.97	0.5	2.79	0.99
17.1935	1031.61	1.98	1.8	-0.07	7688.6	6943.8	21421.7	4.4	-39.03	2.734	3.105	17.71	169.25	0.8833	0.8861	0.9861	0.8907	17.9	4.463	7192.1	744.8	22.5853	3.78	3.85	1.88	2.46	2.53	2.79	2.86	0.99	0.93	0	256.99	0.5	2.79	0.99
17.2268	1033.61	2.01	1.8	-0.08	7689	6943.8	21422	4.4	-39.03	2.733	3.105	17.7	169.24	0.8834	0.8861	0.9861	0.8907	17.8	4.531	7192.2	745.1	22.5853	3.81	3.89	1.88	2.47	2.55	2.81	2.88	1	0.95	0	260.9	0.5	2.805	1.005
17.2602	1035.61	1.98	1.8	-0.07	7688.3	6943.3	21420.3	4.4	-39.03	2.734	3.105	17.71	169.24	0.8833	0.8861	0.986	0.8906	18.1	4.463	7191.6	745	22.5853	3.78	3.85	1.88	2.46	2.53	2.79	2.86	0.99	0.93	0	257	0.5	2.79	0.99
17.2935	1037.61	1.98	1.8	-0.07	7689	6943.8	21422	4.4	-39.03	2.734	3.105	17.7	169.23	0.8833	0.8862	0.9861	0.8907	18.1	4.463	7192.2	745.2	22.5853	3.78	3.85	1.87	2.46	2.53	2.79	2.86	0.99	0.93	0	256.97	0.5	2.79	0.99
17.3268	1039.61	2.01	1.8	-0.07	7688.6	6943.8	21421.7	4.4	-39.03	2.733	3.106	17.7	169.24	0.8833	0.8861	0.9861	0.8907	17.7	4.53	7192.1	744.8	22.5853	3.81	3.88	1.87	2.47	2.54	2.8	2.87	1	0.95	0	260.89	0.5	2.805	1.005
17.3602	1041.61	1.98	1.8	-0.08	7688.6	6943.3	21420.7	4.4	-39.04	2.734	3.105	17.71	169.25	0.8833	0.8861	0.986	0.8907	18.1	4.462	7191.8	745.3	22.5853	3.78	3.85	1.88	2.46	2.53	2.79	2.86	0.99	0.93	0	256.97	0.5	2.79	0.99
17.3935	1043.61	1.99	1.8	-0.08	7688.6	6943.3	21420.7	4.4	-39.04	2.734	3.105	17.71	169.23	0.8833	0.8861	0.986	0.8907	17.9	4.496	7191.8	745.3	22.5853	3.79	3.86	1.87	2.46	2.53	2.79	2.87	1	0.94	0	258.92	0.5	2.795	0.995
17.4268	1045.61	1.98	1.8	-0.08	7689	6943.8	21422	4.4	-39.04	2.734	3.106	17.71	169.23	0.8833	0.8862	0.9861	0.8907	17.8	4.462	7192.2	745.2	22.5853	3.78	3.86	1.88	2.46	2.54	2.79	2.87	0.99	0.93	0	256.96	0.5	2.79	0.99
17.4602	1047.61	1.99	1.8	-0.08	7688.7	6943.8	21421.7	4.4	-39.04	2.734	3.105	17.72	169.23	0.8832	0.8862	0.9861	0.8907	18.1	4.496	7192.1	744.8	22.5853	3.79	3.87	1.87	2.46	2.54	2.79	2.87	1	0.94	0	258.92	0.5	2.795	0.995
17.4935	1049.61	2.01	1.8	-0.08	7688.6	6943.3	21420.7	4.4	-39.03	2.733	3.105	17.71	169.23	0.8833	0.8861	0.986	0.8907	17.9	4.53	7191.8	745.3	22.5853	3.81	3.89	1.88	2.47	2.55	2.8	2.88	1	0.95	0	260.89	0.5	2.805	1.005
17.5268	1051.61	1.99	1.79	-0.08	7689	6943.8	21422	4.4	-39.04	2.734	3.106	17.72	169.23	0.8833	0.8862	0.9861	0.8907	17.8	4.496	7192.2	745.2	22.5853	3.78	3.86	1.87	2.45	2.53	2.79	2.86	1	0.94	0	258.89	0.5	2.785	0.995
17.56	1053.6	1.98	1.79	-0.07	7689	6943.8	21422	4.4	-39.04	2.734	3.105	17.71	169.23	0.8833	0.8862	0.9861	0.8907	17.9	4.462	7192.2	745.2	22.5853	3.77	3.84	1.86	2.45	2.52	2.78	2.85	0.99	0.93	0	256.93	0.5	2.78	0.99
17.5933	1055.6	1.99	1.8	-0.07	7689	6943.8	21422	4.4	-39.03	2.734	3.105	17.71	169.21	0.8833	0.8862	0.9861	0.8907	18.1	4.496	7192.2	745.2	22.5853	3.79	3.86	1.87	2.46	2.53	2.8	2.87	1	0.94	0	258.92	0.5	2.795	0.995
17.6267	1057.6	1.99	1.8	-0.08	7688.3	6943.3	21420.3	4.4	-39.04	2.734	3.105	17.71	169.23	0.8833	0.8861	0.986	0.8906	17.9	4.496	7191.6	745	22.5853	3.79	3.86	1.87	2.46	2.53	2.79	2.87	1	0.94	0	258.93	0.5	2.795	0.995
17.66	1059.6	1.99	1.8	-0.08	7688.6	6943.3	21420.7	4.4	-39.04	2.734	3.105	17.71	169.23	0.8833	0.8861	0.986	0.8907	18.1	4.496	7191.8	745.3	22.5853	3.79	3.87	1.88	2.46	2.54	2.8	2.87	1	0.94	0	258.93	0.5	2.795	0.995
17.6933	1061.6	1.96	1.79	-0.08	7688.6	6943.8	21421.7	4.3	-39.05	2.734	3.107	17.71	169.24	0.8833	0.8861	0.9861	0.8907	17.7	4.427	7192.1	744.8	22.5853	3.75	3.82	1.86	2.44	2.51	2.77	2.84	0.98	0.92	0	254.96	0.5	2.77	0.98
17.7267	1063.6	1.98	1.79	-0.08	7688.7	6943.8	21421.7	4.4	-39.06	2.736	3.107	17.72	169.24	0.8832	0.8862	0.9861	0.8907	18.1	4.462	7192.1	744.8	22.5853	3.77	3.85	1.87	2.45	2.53	2.78	2.86	0.99	0.93	0	256.94	0.5	2.78	0.99
17.76	1065.6	1.99	1.79	-0.08	7688.7	6943.8	21421.7	4.4	-39.06	2.736	3.107	17.72	169.23	0.8832	0.8862	0.9861	0.8907	18.1	4.496	7192.1	744.8	22.5853	3.78	3.86	1.87	2.45	2.54	2.79	2.87	1	0.94	0	258.9	0.5	2.785	0.995
17.7933	1067.6	1.99	1.79	-0.08	7689	6944.3	21423	4.4	-39.05	2.734	3.107	17.71	169.23	0.8833	0.8862	0.9862	0.8907	17.8	4.496	7192.6	744.7	22.5852	3.78	3.86	1.87	2.45	2.53	2.78	2.86	1	0.94	0	258.88	0.5	2.785	0.995
17.8267	1069.6	2.02	1.79	-0.08	7689	6944.3	21423	4.5	-39.05	2.735	3.107	17.72	169.23	0.8832	0.8863	0.9862	0.8907	18	4.564	7192.6	744.7	22.5852	3.81	3.89	1.87	2.46	2.54	2.8	2.88	1.01	0.95	0	262.8	0.5	2.8	1.01
17.86	1071.6	1.98	1.79	-0.08	7688.7	6943.3	21420.7	4.4	-39.05	2.734	3.106	17.71	169.22	0.8832	0.8862	0.986	0.8907	18	4.462	7191.8	745.4	22.5853	3.76	3.84	1.87	2.44	2.52	2.77	2.85	0.99	0.93	0	256.92	0.5	2.775	0.99
17.8933	1073.6	1.98	1.79	-0.08	7688.6	6943.3	21420.7	4.4	-39.05	2.735	3.107	17.71	169.23	0.8833	0.8861	0.986	0.8907	17.8	4.462	7191.8	745.3	22.5853	3.77	3.85	1.87	2.45	2.53	2.78	2.86	0.99	0.93	0	256.94	0.5	2.78	0.99
17.9267	1075.6	1.98	1.79	-0.08	7688.6	6944.3	21422.7	4.4	-39.05	2.734	3.106	17.71	169.22	0.8833	0.8861	0.9862	0.8907	17.8	4.462	7192.4	744.3	22.5852	3.77	3.84	1.87	2.45	2.52	2.78	2.85	0.99	0.93	0	256.94	0.5	2.78	0.99
17.96	1077.6	1.98	1.79	-0.08	7688.3	6943.8	21421.4	4.4	-39.05	2.735	3.107	17.71	169.22	0.8832	0.8861	0.9861	0.8906	18	4.462	7192	744.5	22.5853	3.77	3.85	1.87	2.45	2.53	2.78	2.86	0.99	0.93	0	256.95	0.5	2.78	0.99
17.9933	1079.6	1.99	1.79	-0.08	7689	6943.8	21422	4.4	-39.04	2.734	3.106	17.7	169.22	0.8834	0.8861	0.9861	0.8907	18	4.496	7192.2	745.1	22.5853	3.78	3.86	1.87	2.45	2.53	2.79	2.86	1	0.94	0	258.89	0.5	2.785	0.995
18.0267	1081.6	2.01	1.78	-0.08	7689	6944.3	21423	4.4	-39.04	2.734	3.106	17.7	169.22	0.8833	0.8862	0.9862	0.8907	18	4.529	7192.6	744.7	22.5852	3.79	3.86	1.86	2.45	2.53	2.78	2.86	1	0.95	0	260.82	0.5	2.785	1.005
18.06	1083.6	1.98	1.79	-0.07	7688.3	6943.8	21421.4	4.4	-39.04	2.734	3.106	17.7	169.22	0.8832	0.8861	0.9861	0.8906	18	4.462	7192	744.5	22.5853	3.77	3.84	1.86	2.45	2.52	2.78	2.85	0.99	0.93	0	256.95	0.5	2.78	0.99
18.0933	1085.6	1.98	1.79	-0.08	7688.3	6943.8	21421.4	4.4	-39.03	2.734	3.106	17.69	169.22	0.8832	0.8861	0.9861	0.8906	18	4.462	7192	744.5	22.5853	3.77	3.84	1.87	2.45	2.52	2.78	2.85	0.99	0.93	0	256.95	0.5	2.78	0.99
18.1267	1087.6	1.99	1.79	-0.07	7688.6	6943.8	21421.7	4.4	-39.03	2.734	3.106	17.7	169.23	0.8833	0.8861	0.9861	0.8907	18	4.496	7192.1	744.8	22.5853	3.78	3.85	1.86	2.45	2.52	2.78	2.85	1	0.94	0	258.89	0.5	2.785	0.995
18.16	1089.6	1.96	1.79	-0.08	7688	6943.8	21421	4.3	-39.04	2.734	3.106	17.69	169.45	0.8832	0.8861	0.9861	0.8906	17.8	4.428	7191.9	744.2	22.5853	3.75	3.83	1.87	2.44	2.52	2.77	2.85	0.98	0.92	0	255	0.5	2.77	0.98
18.1933	1091.6	1.98	1.79	-0.08	7688.7	6943.8	21421.7	4.4	-39.04	2.733	3.107	17.7	170.06	0.8832	0.8862	0.9861	0.8907	17.5	4.462	7192.1	744.8	22.5853	3.77	3.84	1.87	2.45	2.52	2.78	2.85	0.99	0.93	0	256.94	0.5	2.78	0.99
18.2267	1093.6	1.98	1.79	-0.08	7688.7	6943.8	21421.7	4.4	-39.04	2.733	3.106	17.69	170.63	0.8832	0.8862	0.9861	0.8907	17.7	4.462	7192.1	744.8	22.5853	3.76	3.84	1.87	2.44	2.52	2.77	2.85	0.99	0.93	0	256.92	0.5	2.775	0.99
18.26	1095.6	1.99	1.79	-0.08	7688.7	6943.3	21420.7	4.4	-39.03	2.734	3.105	17.69	171.18	0.8832	0.8862	0.986	0.8907	18.1	4.496	7191.8	745.4	22.5853	3.78	3.86	1.87	2.45	2.53	2.79	2.86	1	0.94	0	258.9	0.5	2.785	0.995
18.2933	1097.6	1.98	1.79	-0.08	7688.3	6943.8	21421.4	4.4	-39.04	2.734	3.105	17.68	171.71	0.8832	0.8861	0.9861	0.8906	17.9	4.462	7192	744.5	22.5853	3.76	3.84	1.86	2.44	2.52	2.77	2.85	0.99	0.93	0	256.94	0.5	2.775	0.99
18.3267	1099.6	1.99	1.79	-0.08	7689.3	6943.8	21422.3	4.4	-39.04	2.734	3.106	17.68	172.64	0.8833	0.8863	0.9861	0.8907	17.8	4.496	7192.3	745.5	22.5853	3.78	3.86	1.87	2.45	2.53	2.79	2.87	1	0.94	0	258.88	0.5	2.785	0.995
18.36	1101.6	1.98	1.79	-0.08	7689	6943.3	21421	4.4	-39.05	2.734	3.106	17.69	173.37	0.8833	0.8862	0.986	0.8907	18	4.462	7191.9	745.7	22.5853	3.76	3.85	1.87	2.44	2.53	2.77	2.86	0.99	0.93	0	256.91	0.5	2.775	0.99
18.3933	1103.6	2.01	1.78	-0.08	7688.3	6943.8	21421.4	4.4	-39.04	2.734	3.107	17.68	173.99	0.8832	0.8861	0.9861	0.8906	17.7	4.529	7192	744.5	22.5853	3.79	3.86	1.86	2.45	2.53	2.78	2.86	1	0.95	0	260.84	0.5	2.785	1.005
18.4267	1105.6	1.99	1.78	-0.08	7689	6943.3	21421	4.4	-39.04	2.734	3.107	17.69	174.53	0.8833	0.8862	0.986	0.8907	17.7	4.495	7191.9	745.7	22.5853	3.77	3.85	1.86	2.45	2.52	2.78	2.86	1	0.94	0	258.86	0.5	2.775	0.995
18.46	1107.6	1.98	1.78	-0.08	7689	6943.3	21421	4.4	-39.05	2.734	3.107	17.68	175.28	0.8833	0.8862	0.986	0.8907	17.7	4.461	7191.9	745.7	22.5853	3.76	3.83	1.86	2.44	2.52	2.77	2.84	0.99	0.93	0	256.9	0.5	2.77	0.99
18.4933	1109.6	1.99	1.78	-0.08	7688.3	6943.3	21420.3	4.4	-39.04	2.734	3.106	17.68	175.82	0.8833	0.8861	0.986	0.8906	18	4.495	7191.6	745	22.5853	3.77	3.85	1.86	2.45	2.52	2.78	2.85	1	0.94	0	258.88	0.5	2.775	0.995
18.5267	1111.6	2.02	1.79	-0.08	7689	6943.3	21421	4.5	-39.04	2.733	3.107	17.68	176.64	0.8833	0.8862	0.986	0.8907	17.5	4.564	7191.9	745.7	22.5853	3.81	3.88	1.86	2.46	2.53	2.8	2.87	1.01	0.95	0	262.8	0.5	2.8	1.01
18.56	1113.6	1.98	1.78	-0.08	7689	6943.3	21421	4.4	-39.04	2.734	3.105	17.68	177.27	0.8833	0.8862	0.986	0.8907	18.1	4.461	7191.9	745.7	22.5853	3.76	3.83	1.86	2.44	2.52	2.77	2.84	0.99	0.93	0	256.9	0.5	2.77	0.99
18.5933	1115.6	1.99	1.79	-0.08	7688.3	6943.3	21420.3	4.4	-39.03	2.734	3.106	17.68	178.01	0.8832	0.8861	0.986	0.8906	17.8	4.496	7191.7	745	22.5853	3.78	3.86	1.87	2.45	2.53	2.78	2.86	1	0.94	0	258.9	0.5	2.785	0.995
18.6267	1117.6	1.99	1.78	-0.08	7689	6942.8	21420.1	4.4	-39.04	2.733	3.105	17.68	179.28	0.8833	0.8862	0.9859	0.8907	17.8	4.495	7191.5	746.2	22.5853	3.77	3.85	1.86	2.45	2.52	2.78	2.86	1	0.94	0	258.86	0.5	2.775	0.995
18.66	1119.6	1.99	1.79	-0.08	7688.7	6942.8	21419.7	4.4	-39.03	2.732	3.105	17.68	181.3	0.8832	0.8862	0.9859	0.8907	17.5	4.496	7191.4	745.9	22.5853	3.78	3.85	1.86	2.45	2.52	2.78	2.86	1	0.94	0	258.89	0.5	2.785	0.995
18.6933	1121.6	2.02	1.78	-0.08	7689	6942.8	21420.1	4.5	-39.04	2.733	3.105	17.68	182.34	0.8833	0.8862	0.9859	0.8907	17.8	4.563	7191.5	746.2	22.5853	3.8	3.87	1.85	2.45	2.53	2.79	2.86	1.01	0.95	0	262.77	0.5	2.79	1.01
18.7267	1123.6	2.02	1.78	-0.08	7689	6942.3	21419	4.5	-39.04	2.734	3.106	17.68	182.81	0.8833	0.8862	0.9859	0.8907	18	4.563	7191.2	746.7	22.5853	3.8	3.88	1.86	2.46	2.53	2.79	2.87	1.01	0.95	0	262.78	0.5	2.79	1.01
18.76	1125.6	1.99	1.78	-0.08	7689	6942.8	21420.1	4.4	-39.05	2.734	3.107	17.68	183.33	0.8832	0.8863	0.9859	0.8907	17.7	4.495	7191.6	746.2	22.5853	3.77	3.85	1.86	2.44	2.52	2.77	2.86	1	0.94	0	258.84	0.5	2.775	0.995
18.7933	1127.6	1.99	1.78	-0.08	7689	6942.8	21420.1	4.4	-39.04	2.734	3.106	17.67	184.16	0.8833	0.8862	0.9859	0.8907	17.8	4.495	7191.5	746.2	22.5853	3.77	3.85	1.86	2.45	2.52	2.78	2.85	1	0.94	0	258.86	0.5	2.775	0.995
18.8267	1129.6	1.99	1.78	-0.08	7688.3	6942.3	21418.4	4.4	-39.04	2.734	3.107	17.67	184.89	0.8832	0.8861	0.9859	0.8906	17.7	4.495	7191	746	22.5853	3.77	3.85	1.86	2.45	2.52	2.78	2.85	1	0.94	0	258.88	0.5	2.775	0.995
18.86	1131.6	2.01	1.78	-0.08	7689	6942.3	21419	4.4	-39.04	2.734	3.106	17.67	185.85	0.8833	0.8862	0.9859	0.8907	17.8	4.529	7191.2	746.7	22.5853	3.78	3.86	1.85	2.45	2.52	2.78	2.85	1	0.95	0	260.81	0.5	2.78	1.005
18.8933	1133.6	2.02	1.78	-0.07	7688.3	6942.8	21419.4	4.5	-39.04	2.733	3.105	17.67	186.97	0.8833	0.8861	0.9859	0.8906	17.9	4.563	7191.3	745.5	22.5853	3.8	3.87	1.85	2.46	2.53	2.79	2.86	1.01	0.95	0	262.81	0.5	2.79	1.01
18.9267	1135.6	2.02	1.78	-0.07	7688.7	6943.3	21420.7	4.5	-39.04	2.733	3.106	17.67	188.32	0.8832	0.8862	0.986	0.8907	17.7	4.563	7191.8	745.4	22.5853	3.8	3.87	1.85	2.46	2.53	2.79	2.86	1.01	0.95	0	262.79	0.5	2.79	1.01
18.96	1137.6	2.02	1.78	-0.07	7689	6942.3	21419	4.5	-39.04	2.733	3.105	17.67	189.23	0.8833	0.8862	0.9859	0.8907	17.8	4.563	7191.2	746.7	22.5853	3.8	3.87	1.85	2.46	2.53	2.79	2.86	1.01	0.95	0	262.78	0.5	2.79	1.01
18.9933	1139.6	2.04	1.78	-0.07	7689.3	6942.8	21420.4	4.5	-39.03	2.733	3.105	17.66	189.85	0.8833	0.8863	0.9859	0.8907	17.8	4.598	7191.7	746.5	22.5853	3.82	3.89	1.85	2.46	2.53	2.8	2.87	1.02	0.96	0	264.73	0.5	2.8	1.02
19.0267	1141.6	2.01	1.78	-0.08	7689	6942.3	21419	4.4	-39.04	2.734	3.107	17.67	190.47	0.8833	0.8862	0.9859	0.8907	17.7	4.529	7191.2	746.7	22.5853	3.79	3.86	1.86	2.45	2.53	2.78	2.86	1	0.95	0	260.82	0.5	2.785	1.005
19.06	1143.6	2.01	1.78	-0.08	7688.4	6942.3	21418.4	4.4	-39.03	2.734	3.106	17.68	190.98	0.8831	0.8862	0.9859	0.8906	18	4.529	7191	746	22.5853	3.78	3.86	1.85	2.45	2.52	2.78	2.85	1	0.95	0	260.83	0.5	2.78	1.005
19.0933	1145.6	1.98	1.78	-0.08	7688.3	6942.3	21418.4	4.4	-39.04	2.734	3.107	17.67	191.65	0.8833	0.8861	0.9859	0.8906	17.8	4.461	7191	746	22.5853	3.76	3.83	1.86	2.44	2.52	2.77	2.84	0.99	0.93	0	256.92	0.5	2.77	0.99
19.1267	1147.6	2.01	1.78	-0.08	7689	6942.3	21419	4.4	-39.04	2.734	3.107	17.67	192.28	0.8833	0.8862	0.9859	0.8907	17.7	4.529	7191.2	746.7	22.5853	3.78	3.86	1.86	2.45	2.52	2.78	2.86	1	0.95	0	260.81	0.5	2.78	1.005
19.16	1149.6	2.01	1.78	-0.08	7689	6942.3	21419	4.4	-39.04	2.734	3.107	17.68	192.96	0.8833	0.8862	0.9859	0.8907	17.8	4.529	7191.2	746.7	22.5853	3.78	3.86	1.85	2.45	2.52	2.78	2.85	1	0.95	0	260.81	0.5	2.78	1.005
19.1933	1151.6	1.99	1.77	-0.08	7688.6	6942.8	21419.7	4.4	-39.04	2.734	3.107	17.68	193.61	0.8833	0.8861	0.9859	0.8907	17.7	4.495	7191.4	745.8	22.5853	3.76	3.84	1.85	2.44	2.52	2.77	2.85	1	0.94	0	258.84	0.5	2.765	0.995
19.2267	1153.6	2.01	1.78	-0.08	7689	6942.8	21420.1	4.4	-39.04	2.734	3.107	17.68	194.28	0.8833	0.8862	0.9859	0.8907	17.8	4.529	7191.5	746.2	22.5853	3.78	3.86	1.86	2.45	2.52	2.78	2.86	1	0.95	0	260.81	0.5	2.78	1.005
19.26	1155.6	1.99	1.78	-0.08	7688.7	6943.3	21420.7	4.4	-39.04	2.734	3.107	17.68	194.62	0.8832	0.8862	0.986	0.8907	17.7	4.495	7191.8	745.4	22.5853	3.77	3.85	1.86	2.44	2.52	2.77	2.85	1	0.94	0	258.86	0.5	2.775	0.995
19.2933	1157.6	1.99	1.77	-0.08	7688.3	6942.3	21418.4	4.4	-39.04	2.734	3.107	17.68	194.89	0.8832	0.8861	0.9859	0.8906	17.7	4.495	7191	746	22.5853	3.76	3.84	1.85	2.44	2.51	2.77	2.84	1	0.94	0	258.85	0.5	2.765	0.995
19.3267	1159.6	2.02	1.78	-0.08	7689	6942.8	21420.1	4.5	-39.04	2.734	3.107	17.68	195.41	0.8833	0.8862	0.9859	0.8907	17.7	4.563	7191.5	746.2	22.5853	3.8	3.88	1.86	2.46	2.53	2.79	2.87	1.01	0.95	0	262.78	0.5	2.79	1.01
19.36	1161.6	1.98	1.78	-0.08	7689	6942.8	21420.1	4.4	-39.04	2.734	3.107	17.68	195.91	0.8833	0.8862	0.9859	0.8907	17.8	4.461	7191.5	746.2	22.5853	3.75	3.83	1.86	2.44	2.51	2.76	2.84	0.99	0.93	0	256.88	0.5	2.765	0.99
19.3933	1163.6	1.99	1.78	-0.08	7688.3	6942.8	21419.4	4.4	-39.04	2.734	3.107	17.68	196.43	0.8832	0.8861	0.9859	0.8906	17.7	4.495	7191.3	745.5	22.5853	3.77	3.85	1.86	2.44	2.52	2.77	2.85	1	0.94	0	258.87	0.5	2.775	0.995
19.4267	1165.6	1.97	1.77	-0.08	7688.6	6942.3	21418.7	4.4	-39.06	2.735	3.109	17.69	197.03	0.8833	0.8861	0.9859	0.8907	17.6	4.46	7191.1	746.3	22.5853	3.74	3.83	1.85	2.43	2.51	2.76	2.84	0.99	0.93	0	256.86	0.5	2.755	0.985
19.46	1167.6	1.99	1.77	-0.09	7688.7	6942.3	21418.7	4.4	-39.06	2.736	3.108	17.7	197.45	0.8832	0.8862	0.9859	0.8907	18	4.495	7191.1	746.4	22.5853	3.76	3.85	1.86	2.43	2.52	2.76	2.85	1	0.94	0	258.83	0.5	2.765	0.995
19.4933	1169.6	2.02	1.77	-0.08	7688.3	6943.3	21420.3	4.5	-39.06	2.736	3.107	17.7	198.31	0.8832	0.8861	0.986	0.8906	18	4.563	7191.7	745	22.5853	3.79	3.88	1.86	2.45	2.53	2.78	2.87	1.01	0.95	0	262.78	0.5	2.78	1.01
19.5267	1171.6	2.01	1.77	-0.08	7688.7	6942.8	21419.7	4.4	-39.06	2.736	3.108	17.7	199.05	0.8832	0.8862	0.9859	0.8907	17.9	4.529	7191.4	745.9	22.5853	3.78	3.86	1.86	2.44	2.52	2.78	2.86	1	0.95	0	260.8	0.5	2.775	1.005
19.56	1173.6	1.98	1.77	-0.09	7688.7	6942.3	21418.7	4.4	-39.05	2.736	3.108	17.7	199.85	0.8832	0.8862	0.9859	0.8907	17.9	4.461	7191.1	746.4	22.5853	3.75	3.84	1.86	2.43	2.52	2.76	2.85	0.99	0.93	0	256.88	0.5	2.76	0.99
19.5933	1175.6	1.99	1.77	-0.08	7688.7	6943.3	21420.7	4.4	-39.05	2.734	3.108	17.69	200.54	0.8832	0.8862	0.986	0.8907	17.6	4.495	7191.8	745.4	22.5853	3.76	3.84	1.85	2.44	2.52	2.77	2.85	1	0.94	0	258.84	0.5	2.765	0.995
19.6267	1177.6	1.98	1.78	-0.08	7689.3	6942.8	21420.4	4.4	-39.05	2.735	3.108	17.69	201.4	0.8833	0.8863	0.9859	0.8907	17.7	4.461	7191.7	746.5	22.5853	3.75	3.83	1.86	2.44	2.51	2.76	2.84	0.99	0.93	0	256.87	0.5	2.765	0.99
19.66	1179.6	1.98	1.77	-0.08	7688.7	6942.8	21419.7	4.4	-39.05	2.734	3.107	17.69	202.61	0.8832	0.8862	0.9859	0.8907	17.8	4.461	7191.4	745.9	22.5853	3.75	3.83	1.86	2.43	2.51	2.76	2.84	0.99	0.93	0	256.88	0.5	2.76	0.99
19.6933	1181.6	1.98	1.78	-0.08	7688.6	6943.3	21420.7	4.4	-39.05	2.734	3.107	17.7	203.58	0.8833	0.8861	0.986	0.8907	17.7	4.461	7191.8	745.3	22.5853	3.76	3.83	1.86	2.44	2.52	2.77	2.84	0.99	0.93	0	256.91	0.5	2.77	0.99
19.7267	1183.6	2.01	1.78	-0.08	7689.3	6943.3	21421.3	4.4	-39.05	2.734	3.107	17.7	204.34	0.8833	0.8863	0.986	0.8907	17.7	4.529	7192	746	22.5853	3.78	3.86	1.86	2.45	2.52	2.78	2.86	1	0.95	0	260.8	0.5	2.78	1.005
19.7598	1185.59	1.99	1.77	-0.08	7688.7	6943.3	21420.7	4.4	-39.05	2.736	3.108	17.7	204.98	0.8832	0.8862	0.986	0.8907	17.9	4.495	7191.8	745.4	22.5853	3.76	3.84	1.85	2.44	2.52	2.77	2.85	1	0.94	0	258.84	0.5	2.765	0.995
19.7932	1187.59	1.98	1.78	-0.08	7688.6	6943.8	21421.7	4.4	-39.05	2.735	3.109	17.7	205.88	0.8833	0.8861	0.9861	0.8907	17.6	4.461	7192.1	744.8	22.5853	3.75	3.83	1.86	2.44	2.51	2.76	2.84	0.99	0.93	0	256.9	0.5	2.765	0.99
19.8265	1189.59	2.02	1.77	-0.08	7689	6943.3	21421	4.5	-39.05	2.736	3.108	17.69	206.37	0.8833	0.8862	0.986	0.8907	17.9	4.563	7191.9	745.7	22.5853	3.79	3.87	1.85	2.45	2.53	2.78	2.86	1.01	0.95	0	262.75	0.5	2.78	1.01
19.8598	1191.59	1.99	1.77	-0.08	7688.3	6942.8	21419.4	4.4	-39.05	2.736	3.109	17.7	206.98	0.8832	0.8861	0.9859	0.8906	17.7	4.495	7191.3	745.5	22.5853	3.76	3.85	1.86	2.44	2.52	2.77	2.85	1	0.94	0	258.85	0.5	2.765	0.995
19.8932	1193.59	1.98	1.78	-0.08	7688.7	6943.3	21420.7	4.4	-39.05	2.735	3.107	17.69	207.66	0.8832	0.8862	0.986	0.8907	17.8	4.461	7191.8	745.4	22.5853	3.75	3.83	1.86	2.44	2.51	2.76	2.84	0.99	0.93	0	256.89	0.5	2.765	0.99
19.9265	1195.59	1.99	1.78	-0.08	7689	6943.3	21421	4.4	-39.04	2.735	3.108	17.69	208.36	0.8833	0.8862	0.986	0.8907	17.7	4.495	7191.9	745.7	22.5853	3.77	3.85	1.86	2.44	2.52	2.77	2.85	1	0.94	0	258.85	0.5	2.775	0.995
19.9598	1197.59	1.98	1.77	-0.08	7688.7	6942.8	21419.7	4.4	-39.05	2.736	3.107	17.7	209.02	0.8832	0.8862	0.9859	0.8907	18	4.461	7191.4	745.9	22.5853	3.75	3.83	1.85	2.43	2.51	2.76	2.84	0.99	0.93	0	256.88	0.5	2.76	0.99
19.9932	1199.59	1.98	1.77	-0.08	7689	6943.8	21422	4.4	-39.05	2.735	3.108	17.7	209.6	0.8833	0.8862	0.9861	0.8907	17.7	4.461	7192.2	745.2	22.5853	3.75	3.83	1.85	2.43	2.51	2.76	2.84	0.99	0.93	0	256.87	0.5	2.76	0.99
20.0265	1201.59	1.99	1.77	-0.08	7689	6943.8	21422	4.4	-39.05	2.734	3.108	17.7	210.51	0.8833	0.8862	0.9861	0.8907	17.6	4.495	7192.2	745.2	22.5853	3.76	3.85	1.86	2.44	2.52	2.77	2.85	1	0.94	0	258.83	0.5	2.765	0.995
20.0598	1203.59	1.98	1.77	-0.08	7689	6943.3	21421	4.4	-39.05	2.735	3.108	17.7	211.42	0.8833	0.8862	0.986	0.8907	17.7	4.461	7191.9	745.7	22.5853	3.75	3.83	1.86	2.43	2.51	2.76	2.84	0.99	0.93	0	256.87	0.5	2.76	0.99
20.0932	1205.59	1.98	1.77	-0.08	7688.6	6943.3	21420.7	4.4	-39.05	2.735	3.108	17.7	212.33	0.8833	0.8861	0.986	0.8907	17.7	4.461	7191.8	745.3	22.5853	3.75	3.83	1.85	2.43	2.51	2.76	2.84	0.99	0.93	0	256.88	0.5	2.76	0.99
20.1265	1207.59	1.99	1.77	-0.08	7689	6943.8	21422	4.4	-39.05	2.735	3.108	17.7	213.33	0.8833	0.8862	0.9861	0.8907	17.7	4.495	7192.2	745.2	22.5853	3.76	3.85	1.86	2.44	2.52	2.77	2.85	1	0.94	0	258.83	0.5	2.765	0.995
20.1598	1209.59	1.99	1.77	-0.08	7688.7	6943.3	21420.7	4.4	-39.05	2.736	3.108	17.7	214.24	0.8832	0.8862	0.986	0.8907	17.9	4.495	7191.8	745.4	22.5853	3.76	3.84	1.85	2.44	2.52	2.77	2.85	1	0.94	0	258.84	0.5	2.765	0.995
20.1932	1211.59	1.99	1.77	-0.08	7688.6	6943.8	21421.7	4.4	-39.06	2.737	3.109	17.7	215.11	0.8833	0.8861	0.9861	0.8907	18	4.495	7192.1	744.8	22.5853	3.76	3.84	1.85	2.43	2.51	2.76	2.85	1	0.94	0	258.83	0.5	2.765	0.995
20.2265	1213.59	2.01	1.77	-0.08	7688.3	6943.3	21420.3	4.4	-39.06	2.736	3.109	17.7	216.25	0.8832	0.8861	0.986	0.8906	17.9	4.529	7191.7	745	22.5853	3.77	3.86	1.85	2.44	2.52	2.77	2.85	1	0.95	0	260.8	0.5	2.77	1.005
20.2598	1215.59	1.99	1.77	-0.08	7688.3	6943.3	21420.3	4.4	-39.06	2.736	3.107	17.7	217.91	0.8832	0.8861	0.986	0.8906	18.1	4.495	7191.7	745	22.5853	3.76	3.84	1.85	2.43	2.51	2.76	2.85	1	0.94	0	258.84	0.5	2.765	0.995
20.2932	1217.59	2.01	1.77	-0.08	7688.6	6943.8	21421.7	4.4	-39.06	2.735	3.107	17.7	220.07	0.8833	0.8861	0.9861	0.8907	17.8	4.529	7192.1	744.8	22.5853	3.77	3.85	1.85	2.44	2.52	2.77	2.85	1	0.95	0	260.79	0.5	2.77	1.005
20.3265	1219.59	2.01	1.77	-0.08	7688.3	6942.8	21419.4	4.4	-39.05	2.736	3.108	17.7	221.57	0.8832	0.8861	0.9859	0.8906	17.9	4.529	7191.3	745.5	22.5853	3.77	3.85	1.85	2.44	2.52	2.77	2.85	1	0.95	0	260.8	0.5	2.77	1.005
20.3598	1221.59	1.99	1.76	-0.09	7688.7	6943.8	21421.7	4.4	-39.06	2.736	3.108	17.7	222.19	0.8832	0.8862	0.9861	0.8907	18	4.494	7192.1	744.8	22.5853	3.75	3.84	1.85	2.43	2.51	2.76	2.85	0.99	0.94	0	258.81	0.5	2.755	0.995
20.3932	1223.59	2.01	1.77	-0.08	7689	6943.3	21421	4.4	-39.06	2.736	3.109	17.7	222.31	0.8833	0.8862	0.986	0.8907	17.9	4.529	7191.9	745.7	22.5853	3.77	3.86	1.85	2.44	2.52	2.77	2.85	1	0.95	0	260.78	0.5	2.77	1.005
20.4265	1225.59	2.02	1.77	-0.08	7689	6943.8	21422	4.5	-39.06	2.736	3.109	17.7	222.19	0.8833	0.8862	0.9861	0.8907	17.8	4.563	7192.2	745.2	22.5853	3.79	3.88	1.86	2.45	2.53	2.78	2.87	1.01	0.95	0	262.75	0.5	2.78	1.01
20.4598	1227.59	2.01	1.77	-0.08	7689	6943.3	21421	4.4	-39.06	2.738	3.11	17.7	222.08	0.8833	0.8862	0.986	0.8907	17.9	4.529	7191.9	745.7	22.5853	3.78	3.86	1.85	2.44	2.52	2.78	2.85	1	0.95	0	260.79	0.5	2.775	1.005
20.4932	1229.59	2.02	1.76	-0.09	7688.3	6943.8	21421.4	4.5	-39.06	2.738	3.11	17.7	221.99	0.8832	0.8861	0.9861	0.8906	18.1	4.562	7192	744.5	22.5853	3.78	3.87	1.85	2.43	2.52	2.77	2.86	1.01	0.95	0	262.73	0.5	2.77	1.01
20.5265	1231.59	1.96	1.76	-0.09	7688.6	6943.3	21420.7	4.3	-39.07	2.738	3.111	17.7	221.92	0.8833	0.8861	0.986	0.8907	17.8	4.426	7191.8	745.3	22.5853	3.72	3.81	1.85	2.42	2.5	2.74	2.83	0.98	0.92	0	254.89	0.5	2.74	0.98
20.5598	1233.59	1.99	1.76	-0.08	7688.6	6943.3	21420.7	4.4	-39.06	2.738	3.11	17.7	221.88	0.8833	0.8861	0.986	0.8907	18.1	4.494	7191.8	745.3	22.5853	3.75	3.84	1.85	2.43	2.51	2.76	2.84	0.99	0.94	0	258.81	0.5	2.755	0.995
20.5932	1235.59	2.02	1.76	-0.09	7689	6943.8	21422	4.5	-39.07	2.738	3.11	17.7	221.86	0.8833	0.8862	0.9861	0.8907	18.1	4.562	7192.2	745.2	22.5853	3.78	3.87	1.85	2.44	2.52	2.77	2.86	1.01	0.95	0	262.72	0.5	2.77	1.01
20.6265	1237.59	2	1.76	-0.09	7688.7	6943.8	21421.7	4.4	-39.08	2.739	3.111	17.71	221.84	0.8832	0.8862	0.9861	0.8907	18	4.528	7192.1	744.8	22.5853	3.76	3.85	1.85	2.43	2.51	2.76	2.85	1	0.95	0	260.76	0.5	2.76	1
20.6598	1239.59	1.97	1.76	-0.09	7688.6	6943.3	21420.7	4.4	-39.07	2.736	3.109	17.71	221.83	0.8833	0.8861	0.986	0.8907	17.9	4.46	7191.8	745.3	22.5853	3.73	3.82	1.85	2.42	2.5	2.75	2.83	0.99	0.93	0	256.83	0.5	2.745	0.985
20.6932	1241.59	1.99	1.76	-0.09	7688.6	6943.8	21421.7	4.4	-39.07	2.736	3.109	17.71	221.83	0.8833	0.8861	0.9861	0.8907	17.9	4.494	7192.1	744.8	22.5853	3.75	3.84	1.85	2.43	2.51	2.76	2.85	0.99	0.94	0	258.81	0.5	2.755	0.995
20.7265	1243.59	2	1.76	-0.09	7688.6	6944.3	21422.7	4.4	-39.07	2.735	3.107	17.71	221.82	0.8833	0.8861	0.9862	0.8907	17.8	4.528	7192.4	744.3	22.5852	3.77	3.86	1.85	2.43	2.52	2.77	2.86	1	0.95	0	260.77	0.5	2.765	1
20.7598	1245.59	1.99	1.75	-0.09	7689.3	6943.8	21422.3	4.4	-39.07	2.736	3.106	17.71	221.82	0.8833	0.8863	0.9861	0.8907	18.4	4.494	7192.3	745.5	22.5853	3.74	3.83	1.84	2.42	2.5	2.75	2.84	0.99	0.94	0	258.76	0.5	2.745	0.995
20.7932	1247.59	2	1.76	-0.09	7688.6	6943.8	21421.7	4.4	-39.07	2.734	3.107	17.71	221.81	0.8833	0.8861	0.9861	0.8907	17.7	4.528	7192.1	744.8	22.5853	3.76	3.85	1.85	2.43	2.51	2.76	2.85	1	0.95	0	260.76	0.5	2.76	1
20.8265	1249.59	1.99	1.76	-0.09	7688.6	6943.8	21421.7	4.4	-39.07	2.734	3.107	17.7	221.8	0.8833	0.8861	0.9861	0.8907	17.8	4.494	7192.1	744.8	22.5853	3.75	3.84	1.85	2.42	2.51	2.75	2.84	0.99	0.94	0	258.8	0.5	2.755	0.995
20.8598	1251.59	1.99	1.76	-0.08	7688.3	6943.3	21420.3	4.4	-39.06	2.734	3.105	17.7	221.8	0.8832	0.8861	0.986	0.8906	18.1	4.494	7191.7	745	22.5853	3.75	3.84	1.85	2.43	2.51	2.76	2.84	0.99	0.94	0	258.82	0.5	2.755	0.995
20.8932	1253.59	1.99	1.76	-0.08	7689	6943.8	21422	4.4	-39.07	2.734	3.105	17.7	221.8	0.8833	0.8862	0.9861	0.8907	17.9	4.494	7192.2	745.2	22.5853	3.75	3.83	1.84	2.42	2.51	2.75	2.84	0.99	0.94	0	258.79	0.5	2.755	0.995
20.9265	1255.59	1.99	1.76	-0.09	7688.7	6943.8	21421.7	4.4	-39.06	2.734	3.106	17.7	221.8	0.8832	0.8862	0.9861	0.8907	17.8	4.494	7192.1	744.8	22.5853	3.75	3.84	1.85	2.42	2.51	2.75	2.84	0.99	0.94	0	258.8	0.5	2.755	0.995
20.9598	1257.59	2	1.76	-0.08	7688.6	6943.3	21420.7	4.4	-39.06	2.734	3.106	17.7	221.81	0.8833	0.8861	0.986	0.8907	18	4.528	7191.8	745.3	22.5853	3.76	3.85	1.84	2.43	2.51	2.76	2.84	1	0.95	0	260.76	0.5	2.76	1
20.9932	1259.59	1.97	1.76	-0.08	7688.6	6943.8	21421.7	4.4	-39.06	2.734	3.106	17.7	221.8	0.8833	0.8861	0.9861	0.8907	17.8	4.46	7192.1	744.8	22.5853	3.73	3.82	1.84	2.42	2.5	2.75	2.83	0.99	0.93	0	256.84	0.5	2.745	0.985
21.0265	1261.59	1.97	1.76	-0.08	7689	6943.8	21422	4.4	-39.06	2.733	3.106	17.69	221.79	0.8833	0.8862	0.9861	0.8907	17.7	4.46	7192.2	745.2	22.5853	3.74	3.82	1.85	2.42	2.5	2.75	2.83	0.99	0.93	0	256.84	0.5	2.75	0.985
21.0598	1263.59	1.99	1.76	-0.08	7689.3	6943.8	21422.3	4.4	-39.07	2.734	3.106	17.7	221.82	0.8833	0.8863	0.9861	0.8907	18	4.494	7192.3	745.5	22.5853	3.75	3.83	1.84	2.42	2.51	2.75	2.84	0.99	0.94	0	258.77	0.5	2.755	0.995
21.0932	1265.59	2	1.75	-0.09	7688	6943.3	21420	4.4	-39.07	2.734	3.105	17.69	221.82	0.8833	0.886	0.986	0.8906	18.1	4.528	7191.5	744.6	22.5853	3.76	3.85	1.84	2.42	2.51	2.76	2.84	1	0.95	0	260.77	0.5	2.755	1
21.1265	1267.59	2	1.76	-0.08	7689.7	6943.3	21421.7	4.4	-39.06	2.734	3.105	17.69	221.8	0.8834	0.8863	0.986	0.8908	18.1	4.528	7192.1	746.3	22.5853	3.77	3.85	1.85	2.43	2.51	2.77	2.85	1	0.95	0	260.74	0.5	2.765	1
21.1598	1269.59	2.02	1.77	-0.09	7703.1	6939.8	21427.9	4.5	-39.05	3.494	3.992	17.69	221.77	0.8844	0.8884	0.9855	0.8923	18.5	4.563	7194.2	763.3	22.5854	3.79	3.88	1.86	2.44	2.53	2.78	2.87	1.01	0.95	0	262.26	0.5	2.78	1.01
21.1932	1271.59	1.99	1.8	-0.08	7696.5	6955.5	21452.4	4.4	-39.04	4.98	5.732	17.81	221.79	0.8843	0.8869	0.9877	0.8916	18	4.496	7202.5	741.1	22.5847	3.79	3.87	1.88	2.46	2.54	2.79	2.87	1	0.94	0	258.66	0.5	2.795	0.995
21.2265	1273.59	1.96	1.83	-0.09	7693.1	6971.1	21479.9	4.3	-39.02	6.126	7.069	17.94	221.81	0.8842	0.8862	0.99	0.8912	18.8	4.43	7211.8	722	22.584	3.79	3.88	1.92	2.48	2.57	2.81	2.9	0.98	0.92	0	254.97	0.5	2.81	0.98
21.2598	1275.59	1.96	1.84	-0.09	7691.1	6983.3	21501.8	4.3	-39.01	6.94	8.017	18.04	221.83	0.8842	0.8858	0.9917	0.8909	19.7	4.431	7219.2	707.8	22.5835	3.8	3.89	1.93	2.5	2.58	2.82	2.91	0.98	0.92	0	255.08	0.5	2.82	0.98
21.2932	1277.59	1.95	1.84	-0.08	7687.6	6988.3	21508.4	4.3	-39.01	7.083	8.188	18.05	221.91	0.8842	0.885	0.9924	0.8905	19	4.397	7221.4	699.3	22.5832	3.79	3.87	1.93	2.49	2.57	2.82	2.9	0.97	0.92	0	253.24	0.5	2.815	0.975
21.3265	1279.59	1.96	1.8	-0.08	7685.9	6971.6	21473.8	4.3	-39.02	6.679	7.718	17.87	221.84	0.8841	0.8847	0.99	0.8903	18.2	4.428	7209.7	714.3	22.584	3.76	3.84	1.88	2.45	2.53	2.78	2.86	0.98	0.92	0	255.1	0.5	2.78	0.98
21.3598	1281.59	1.94	1.75	-0.09	7684.6	6949.9	21429.6	4.3	-39.03	6.075	7.017	17.67	221.78	0.884	0.8845	0.987	0.8902	17.4	4.391	7194.8	734.7	22.585	3.69	3.78	1.84	2.4	2.48	2.72	2.81	0.97	0.92	0	253.02	0.5	2.72	0.97
21.3932	1283.59	1.96	1.72	-0.09	7679.8	6936.7	21399	4.3	-39.04	5.474	6.314	17.55	221.79	0.8838	0.8836	0.9851	0.8896	17.4	4.424	7184.4	743.1	22.5856	3.68	3.76	1.8	2.37	2.46	2.7	2.78	0.98	0.92	0	255.03	0.5	2.7	0.98
21.4265	1285.59	1.96	1.71	-0.09	7683.9	6929.7	21389.1	4.3	-39.05	4.941	5.687	17.51	221.78	0.8839	0.8845	0.9841	0.8901	17.9	4.423	7181.1	754.3	22.5859	3.67	3.76	1.8	2.37	2.45	2.69	2.78	0.98	0.92	0	254.87	0.5	2.69	0.98
21.4598	1287.59	2.02	1.71	-0.09	7686	6926.1	21384.2	4.5	-39.04	4.483	5.149	17.49	221.79	0.8839	0.8849	0.9836	0.8903	18.3	4.559	7179.4	759.9	22.5861	3.73	3.81	1.8	2.38	2.47	2.72	2.8	1.01	0.95	0	262.64	0.5	2.72	1.01
21.4932	1289.59	2.02	1.71	-0.09	7687.7	6927.1	21387.9	4.5	-39.04	4.114	4.716	17.51	221.78	0.8839	0.8853	0.9837	0.8905	18.6	4.56	7180.7	760.6	22.586	3.73	3.82	1.8	2.39	2.47	2.72	2.81	1.01	0.95	0	262.59	0.5	2.72	1.01
21.5265	1291.59	2	1.72	-0.08	7687	6929.2	21391.1	4.4	-39.05	3.822	4.375	17.53	221.77	0.8839	0.8851	0.984	0.8905	18.6	4.526	7181.8	757.9	22.5859	3.73	3.81	1.8	2.39	2.47	2.72	2.81	1	0.94	0	260.69	0.5	2.725	1
21.5598	1293.59	2.02	1.73	-0.07	7686.4	6930.2	21392.5	4.5	-39.05	3.581	4.093	17.55	221.79	0.8839	0.885	0.9842	0.8904	18.6	4.56	7182.2	756.2	22.5859	3.75	3.81	1.79	2.4	2.47	2.74	2.8	1.01	0.95	0	262.69	0.5	2.74	1.01
21.5932	1295.59	1.97	1.72	-0.03	7686	6930.2	21392.2	4.4	-39.06	3.373	3.852	17.54	221.79	0.8839	0.8849	0.9842	0.8903	18.1	4.458	7182.1	755.8	22.5859	3.69	3.72	1.74	2.37	2.4	2.7	2.73	0.99	0.93	0	256.78	0.5	2.705	0.985
21.6265	1297.59	2	1.73	0.02	7686.4	6929.2	21390.5	4.4	-39.05	3.194	3.643	17.54	221.79	0.8839	0.885	0.984	0.8904	18.2	4.526	7181.6	757.2	22.5859	3.73	3.71	1.71	2.39	2.38	2.73	2.71	1	0.94	0	260.72	0.5	2.73	1
21.6598	1299.59	1.99	1.72	0.03	7687.7	6928.7	21390.9	4.4	-39.05	3.041	3.463	17.53	221.79	0.8839	0.8853	0.9839	0.8905	18.3	4.492	7181.7	759.1	22.5859	3.71	3.68	1.69	2.38	2.35	2.71	2.69	0.99	0.94	0	258.68	0.5	2.715	0.995
21.6932	1301.59	1.99	1.72	0.03	7688.4	6928.7	21391.6	4.4	-39.06	2.937	3.342	17.54	221.81	0.8839	0.8854	0.9839	0.8906	18.1	4.492	7181.9	759.7	22.5859	3.71	3.68	1.69	2.38	2.35	2.72	2.68	0.99	0.94	0	258.68	0.5	2.715	0.995
21.7265	1303.59	2.02	1.72	0.03	7689.4	6928.7	21392.6	4.5	-39.06	2.869	3.262	17.55	221.81	0.8839	0.8857	0.9839	0.8907	18.2	4.56	7182.2	760.8	22.5859	3.74	3.71	1.69	2.39	2.36	2.73	2.7	1.01	0.95	0	262.56	0.5	2.73	1.01
21.7598	1305.59	2	1.73	0.04	7689.4	6928.1	21391.6	4.4	-39.06	2.821	3.208	17.56	221.79	0.8839	0.8857	0.9839	0.8907	18	4.526	7181.9	761.3	22.586	3.73	3.69	1.68	2.39	2.35	2.73	2.69	1	0.94	0	260.62	0.5	2.73	1
21.7932	1307.59	2	1.73	0.04	7689.8	6930.7	21396.9	4.4	-39.06	2.79	3.171	17.57	221.81	0.8839	0.8857	0.9842	0.8908	18.1	4.526	7183.7	759.1	22.5859	3.73	3.69	1.69	2.39	2.36	2.73	2.69	1	0.94	0	260.61	0.5	2.73	1
21.8265	1309.59	1.99	1.74	0.04	7689.5	6932.2	21399.6	4.4	-39.07	2.771	3.149	17.59	221.82	0.8839	0.8857	0.9844	0.8907	17.9	4.493	7184.6	757.3	22.5858	3.72	3.69	1.7	2.4	2.36	2.73	2.69	0.99	0.94	0	258.69	0.5	2.73	0.995
21.8598	1311.59	1.99	1.74	0.04	7689.1	6934.2	21403.2	4.4	-39.06	2.756	3.131	17.61	221.01	0.8839	0.8856	0.9847	0.8907	18	4.493	7185.8	754.9	22.5857	3.73	3.69	1.7	2.4	2.37	2.73	2.7	0.99	0.94	0	258.72	0.5	2.735	0.995
21.8932	1313.59	1.97	1.74	0.04	7689.4	6936.7	21408.5	4.4	-39.07	2.744	3.117	17.63	216.52	0.8839	0.8857	0.9851	0.8907	18	4.459	7187.6	752.7	22.5856	3.72	3.68	1.71	2.4	2.37	2.73	2.69	0.99	0.93	0	256.76	0.5	2.73	0.985
21.9265	1315.59	2	1.75	0.03	7689.1	6938.8	21412.2	4.4	-39.07	2.737	3.109	17.65	212.06	0.8839	0.8857	0.9854	0.8907	17.9	4.528	7188.9	750.3	22.5855	3.75	3.72	1.72	2.42	2.38	2.75	2.72	1	0.94	0	260.71	0.5	2.75	1
21.9597	1317.58	2.02	1.75	0.03	7689.4	6941.3	21417.5	4.5	-39.06	2.733	3.103	17.67	208.04	0.8839	0.8857	0.9857	0.8907	18.2	4.562	7190.7	748.1	22.5854	3.77	3.74	1.72	2.43	2.39	2.76	2.73	1.01	0.95	0	262.68	0.5	2.76	1.01
21.993	1319.58	1.99	1.76	0.04	7688.8	6943.3	21420.8	4.4	-39.06	2.73	3.099	17.7	203.91	0.8839	0.8856	0.986	0.8907	18.2	4.494	7191.8	745.5	22.5853	3.75	3.71	1.72	2.42	2.38	2.75	2.72	0.99	0.94	0	258.79	0.5	2.755	0.995
22.0263	1321.58	2	1.76	0.03	7689.4	6945.3	21425.5	4.4	-39.07	2.728	3.098	17.71	200.48	0.8839	0.8857	0.9863	0.8907	18.1	4.528	7193.4	744.1	22.5852	3.76	3.73	1.73	2.43	2.39	2.76	2.73	1	0.95	0	260.73	0.5	2.76	1
22.0597	1323.58	1.99	1.76	0.03	7689.4	6947.4	21429.4	4.4	-39.07	2.727	3.097	17.72	196.91	0.884	0.8856	0.9866	0.8907	18.1	4.494	7194.7	742	22.5851	3.75	3.73	1.74	2.43	2.4	2.76	2.73	0.99	0.94	0	258.79	0.5	2.755	0.995
22.093	1325.58	1.96	1.76	0.03	7689.1	6948.4	21431.1	4.3	-39.06	2.725	3.095	17.74	192.31	0.8839	0.8856	0.9867	0.8907	17.9	4.426	7195.3	740.7	22.5851	3.72	3.69	1.73	2.42	2.38	2.74	2.71	0.98	0.92	0	254.88	0.5	2.74	0.98
22.1263	1327.58	1.97	1.77	0.03	7688.8	6949.9	21433.7	4.4	-39.07	2.727	3.097	17.75	190.01	0.8839	0.8856	0.987	0.8907	18.1	4.46	7196.2	738.9	22.585	3.74	3.71	1.73	2.43	2.39	2.76	2.72	0.99	0.93	0	256.86	0.5	2.755	0.985
22.1597	1329.58	2.01	1.77	0.03	7689.1	6950.4	21435.1	4.4	-39.06	2.726	3.095	17.76	185.92	0.8839	0.8856	0.987	0.8907	18.1	4.529	7196.6	738.7	22.585	3.77	3.74	1.74	2.44	2.41	2.77	2.74	1	0.95	0	260.78	0.5	2.77	1.005
22.193	1331.58	1.97	1.77	0.03	7689.1	6950.4	21435.1	4.4	-39.06	2.727	3.097	17.75	183.85	0.8839	0.8856	0.987	0.8907	18.1	4.46	7196.6	738.7	22.585	3.74	3.71	1.73	2.43	2.39	2.76	2.72	0.99	0.93	0	256.85	0.5	2.755	0.985
22.2263	1333.58	1.96	1.77	0.03	7689.1	6951.4	21437.1	4.3	-39.07	2.726	3.096	17.76	179.7	0.8839	0.8856	0.9872	0.8907	18.1	4.426	7197.3	737.7	22.5849	3.73	3.7	1.74	2.42	2.39	2.75	2.72	0.98	0.92	0	254.89	0.5	2.75	0.98
22.2597	1335.58	1.97	1.77	0.03	7689.8	6950.4	21435.7	4.4	-39.07	2.727	3.096	17.76	176.25	0.884	0.8857	0.987	0.8908	18.2	4.46	7196.9	739.3	22.585	3.74	3.71	1.74	2.43	2.4	2.76	2.73	0.99	0.93	0	256.83	0.5	2.755	0.985
22.293	1337.58	1.97	1.77	0.03	7688.8	6951.4	21436.8	4.4	-39.07	2.728	3.097	17.75	172.71	0.8839	0.8856	0.9872	0.8907	18.2	4.46	7197.2	737.4	22.5849	3.74	3.71	1.73	2.43	2.39	2.76	2.72	0.99	0.93	0	256.87	0.5	2.755	0.985
22.3263	1339.58	1.99	1.77	0.03	7689.1	6951.4	21437.1	4.4	-39.07	2.727	3.097	17.75	168.06	0.8839	0.8856	0.9872	0.8907	18	4.495	7197.3	737.7	22.5849	3.76	3.73	1.74	2.43	2.4	2.76	2.73	1	0.94	0	258.82	0.5	2.765	0.995
22.3597	1341.58	2	1.76	0.03	7689.1	6950.4	21435.1	4.4	-39.08	2.726	3.096	17.75	162.87	0.8839	0.8856	0.987	0.8907	18.1	4.528	7196.6	738.7	22.585	3.76	3.74	1.73	2.43	2.4	2.76	2.74	1	0.95	0	260.75	0.5	2.76	1
22.393	1343.58	1.96	1.76	0.03	7688.7	6949.9	21433.7	4.3	-39.07	2.727	3.097	17.73	159.73	0.8839	0.8855	0.987	0.8907	18	4.426	7196.2	738.8	22.585	3.72	3.7	1.74	2.42	2.39	2.74	2.72	0.98	0.92	0	254.89	0.5	2.74	0.98
22.4263	1345.58	2.02	1.76	0.03	7688.8	6948.9	21431.8	4.5	-39.07	2.728	3.1	17.72	158.74	0.8839	0.8856	0.9868	0.8907	17.8	4.562	7195.5	739.9	22.585	3.78	3.75	1.73	2.44	2.41	2.77	2.74	1.01	0.95	0	262.73	0.5	2.77	1.01
22.4597	1347.58	1.97	1.75	0.03	7688.7	6947.4	21428.7	4.4	-39.07	2.729	3.099	17.72	155.76	0.8839	0.8855	0.9866	0.8907	18	4.46	7194.5	741.4	22.5851	3.73	3.7	1.72	2.41	2.38	2.74	2.71	0.99	0.93	0	256.82	0.5	2.74	0.985
22.493	1349.58	1.99	1.75	0.03	7688.7	6947.4	21428.7	4.4	-39.09	2.728	3.099	17.71	152.54	0.8839	0.8855	0.9866	0.8907	17.9	4.493	7194.5	741.4	22.5851	3.74	3.71	1.72	2.41	2.39	2.74	2.72	0.99	0.94	0	258.77	0.5	2.745	0.995
22.5263	1351.58	2	1.75	0.03	7689.1	6945.3	21425.1	4.4	-39.08	2.728	3.099	17.7	148.55	0.8839	0.8856	0.9863	0.8907	17.9	4.528	7193.3	743.7	22.5852	3.75	3.72	1.72	2.42	2.39	2.75	2.72	1	0.95	0	260.71	0.5	2.75	1
22.5597	1353.58	2	1.74	0.03	7688.8	6944.3	21422.8	4.4	-39.08	2.728	3.097	17.68	144.79	0.8839	0.8856	0.9862	0.8907	18.1	4.527	7192.5	744.4	22.5852	3.75	3.72	1.72	2.41	2.39	2.75	2.72	1	0.94	0	260.71	0.5	2.745	1
22.593	1355.58	1.99	1.74	0.03	7688.1	6943.8	21421.1	4.4	-39.07	2.726	3.097	17.67	140.87	0.8839	0.8854	0.9861	0.8906	17.8	4.493	7191.9	744.3	22.5853	3.73	3.7	1.71	2.4	2.37	2.73	2.71	0.99	0.94	0	258.76	0.5	2.735	0.995
22.6263	1357.58	2.02	1.74	0.03	7688.4	6942.8	21419.5	4.5	-39.08	2.725	3.096	17.66	137.56	0.8839	0.8855	0.9859	0.8906	17.8	4.561	7191.4	745.6	22.5853	3.76	3.73	1.71	2.41	2.38	2.75	2.72	1.01	0.95	0	262.67	0.5	2.75	1.01
22.6597	1359.58	2.02	1.74	0.03	7688.7	6941.8	21417.8	4.5	-39.08	2.724	3.094	17.66	132.67	0.8839	0.8855	0.9858	0.8907	18	4.561	7190.8	746.9	22.5854	3.75	3.73	1.71	2.41	2.38	2.75	2.72	1.01	0.95	0	262.64	0.5	2.745	1.01
22.693	1361.58	1.99	1.73	0.03	7688.4	6940.8	21415.4	4.4	-39.08	2.725	3.096	17.65	130.19	0.8839	0.8854	0.9857	0.8906	17.8	4.492	7190	747.6	22.5854	3.72	3.69	1.71	2.39	2.37	2.73	2.7	0.99	0.94	0	258.71	0.5	2.725	0.995
22.7263	1363.58	2	1.74	0.03	7688.8	6939.8	21413.8	4.4	-39.08	2.724	3.095	17.64	127.77	0.8839	0.8856	0.9855	0.8907	17.6	4.527	7189.4	749	22.5854	3.74	3.72	1.71	2.41	2.38	2.74	2.71	1	0.94	0	260.69	0.5	2.74	1
22.7597	1365.58	2	1.73	0.03	7688.8	6939.8	21413.8	4.4	-39.08	2.723	3.092	17.63	123	0.8839	0.8856	0.9855	0.8907	18	4.527	7189.4	749	22.5854	3.73	3.7	1.7	2.4	2.37	2.73	2.7	1	0.94	0	260.66	0.5	2.73	1
22.793	1367.58	1.99	1.74	0.03	7688.7	6939.3	21412.8	4.4	-39.08	2.721	3.092	17.62	118.31	0.8839	0.8855	0.9854	0.8907	17.7	4.493	7189.1	749.5	22.5855	3.72	3.7	1.71	2.4	2.37	2.73	2.7	0.99	0.94	0	258.72	0.5	2.73	0.995
22.8263	1369.58	2	1.73	0.03	7688.8	6939.3	21412.9	4.4	-39.07	2.724	3.095	17.63	116.91	0.8839	0.8856	0.9854	0.8907	17.7	4.527	7189.1	749.5	22.5855	3.73	3.71	1.7	2.4	2.37	2.73	2.7	1	0.94	0	260.66	0.5	2.73	1
22.8597	1371.58	2	1.74	0.03	7688.4	6938.8	21411.5	4.4	-39.08	2.723	3.094	17.63	113.9	0.8839	0.8855	0.9854	0.8906	17.7	4.527	7188.7	749.7	22.5855	3.74	3.71	1.71	2.4	2.37	2.74	2.71	1	0.94	0	260.69	0.5	2.74	1
22.893	1373.58	2.02	1.73	0.03	7688.4	6938.3	21410.5	4.5	-39.08	2.724	3.093	17.63	110.28	0.8839	0.8854	0.9853	0.8906	18	4.561	7188.3	750.1	22.5855	3.75	3.72	1.7	2.4	2.37	2.74	2.71	1.01	0.95	0	262.64	0.5	2.74	1.01
22.9263	1375.58	1.99	1.74	0.03	7689.1	6939.3	21413.1	4.4	-39.08	2.723	3.095	17.63	106.97	0.884	0.8855	0.9854	0.8907	17.6	4.493	7189.2	749.8	22.5855	3.72	3.7	1.71	2.4	2.37	2.73	2.7	0.99	0.94	0	258.71	0.5	2.73	0.995
22.9597	1377.58	2	1.74	0.02	7689.1	6938.8	21412.1	4.4	-39.08	2.724	3.093	17.64	103.31	0.884	0.8855	0.9854	0.8907	18.1	4.527	7188.9	750.3	22.5855	3.74	3.72	1.71	2.4	2.38	2.74	2.72	1	0.94	0	260.67	0.5	2.74	1
22.993	1379.58	1.99	1.73	0.02	7688.7	6939.3	21412.8	4.4	-39.08	2.724	3.094	17.64	99.15	0.8839	0.8855	0.9854	0.8907	17.9	4.492	7189.1	749.5	22.5855	3.72	3.7	1.71	2.39	2.37	2.73	2.7	0.99	0.94	0	258.7	0.5	2.725	0.995
23.0263	1381.58	2	1.74	0.03	7688.7	6939.8	21413.8	4.4	-39.08	2.723	3.092	17.64	94.77	0.8839	0.8855	0.9855	0.8907	18	4.527	7189.4	749	22.5854	3.74	3.72	1.71	2.41	2.38	2.74	2.71	1	0.94	0	260.69	0.5	2.74	1
23.0597	1383.58	2	1.74	0.03	7688.4	6939.8	21413.4	4.4	-39.08	2.723	3.092	17.65	90.85	0.8839	0.8854	0.9855	0.8906	18	4.527	7189.3	748.6	22.5854	3.74	3.72	1.71	2.41	2.38	2.74	2.71	1	0.94	0	260.7	0.5	2.74	1
23.093	1385.58	1.97	1.74	0.03	7688.4	6939.8	21413.5	4.4	-39.08	2.724	3.094	17.65	87.84	0.8839	0.8855	0.9855	0.8906	17.9	4.459	7189.3	748.6	22.5854	3.71	3.69	1.72	2.4	2.37	2.73	2.7	0.99	0.93	0	256.78	0.5	2.725	0.985
23.1263	1387.58	2.02	1.74	0.03	7689.1	6940.3	21415.1	4.5	-39.08	2.724	3.096	17.66	84.59	0.8839	0.8856	0.9856	0.8907	17.6	4.561	7189.9	748.8	22.5854	3.76	3.74	1.72	2.42	2.39	2.75	2.73	1.01	0.95	0	262.66	0.5	2.75	1.01
23.1597	1389.58	2	1.74	0.02	7688.8	6941.3	21416.8	4.4	-39.09	2.725	3.095	17.67	80.82	0.8839	0.8856	0.9857	0.8907	18	4.527	7190.5	747.5	22.5854	3.74	3.73	1.72	2.41	2.39	2.74	2.73	1	0.94	0	260.69	0.5	2.74	1
23.193	1391.58	2	1.74	0.03	7688.8	6941.3	21416.8	4.4	-39.08	2.726	3.095	17.67	75.87	0.8839	0.8856	0.9857	0.8907	18.2	4.527	7190.5	747.5	22.5854	3.74	3.72	1.72	2.41	2.38	2.74	2.72	1	0.94	0	260.69	0.5	2.74	1
23.2263	1393.58	1.99	1.74	0.03	7688.7	6942.3	21418.8	4.4	-39.09	2.725	3.095	17.68	71.31	0.8839	0.8855	0.9859	0.8907	18	4.493	7191.1	746.4	22.5853	3.73	3.7	1.72	2.41	2.38	2.74	2.71	0.99	0.94	0	258.75	0.5	2.735	0.995
23.2597	1395.58	2	1.74	0.03	7688.7	6942.8	21419.8	4.4	-39.08	2.726	3.096	17.69	67.75	0.8839	0.8855	0.9859	0.8907	18.1	4.527	7191.5	745.9	22.5853	3.75	3.72	1.72	2.41	2.39	2.75	2.72	1	0.94	0	260.71	0.5	2.745	1
23.293	1397.58	1.99	1.75	0.02	7688.4	6943.3	21420.4	4.4	-39.08	2.727	3.098	17.69	64.56	0.8839	0.8855	0.986	0.8906	17.8	4.493	7191.7	745.1	22.5853	3.74	3.72	1.73	2.41	2.39	2.74	2.72	0.99	0.94	0	258.77	0.5	2.745	0.995
23.3263	1399.58	2.02	1.75	0.03	7689.1	6943.3	21421.1	4.5	-39.08	2.728	3.099	17.69	61.05	0.8839	0.8856	0.986	0.8907	17.9	4.562	7191.9	745.8	22.5853	3.77	3.74	1.72	2.42	2.4	2.76	2.73	1.01	0.95	0	262.67	0.5	2.76	1.01
23.3597	1401.58	1.99	1.75	0.02	7688.7	6943.3	21420.8	4.4	-39.08	2.728	3.1	17.69	57.5	0.8839	0.8855	0.986	0.8907	17.8	4.494	7191.8	745.4	22.5853	3.74	3.72	1.73	2.42	2.4	2.75	2.73	0.99	0.94	0	258.78	0.5	2.745	0.995
23.393	1403.58	1.99	1.75	0.03	7688.1	6944.3	21422.1	4.4	-39.08	2.73	3.1	17.7	53.79	0.8839	0.8854	0.9862	0.8906	18.1	4.493	7192.3	743.7	22.5852	3.74	3.71	1.72	2.41	2.38	2.74	2.71	0.99	0.94	0	258.79	0.5	2.745	0.995
23.4263	1405.58	2.02	1.76	0.03	7688.4	6944.3	21422.4	4.5	-39.07	2.73	3.101	17.7	50.62	0.8839	0.8854	0.9862	0.8906	18	4.562	7192.4	744.1	22.5852	3.78	3.75	1.73	2.43	2.4	2.77	2.74	1.01	0.95	0	262.73	0.5	2.77	1.01
23.4597	1407.58	2.02	1.75	0.03	7689.1	6944.8	21424.1	4.5	-39.07	2.732	3.102	17.7	47.87	0.8839	0.8856	0.9862	0.8907	18.3	4.562	7192.9	744.3	22.5852	3.77	3.74	1.72	2.42	2.4	2.76	2.73	1.01	0.95	0	262.68	0.5	2.76	1.01
23.493	1409.58	1.99	1.75	0.03	7689.1	6944.8	21424.1	4.4	-39.08	2.732	3.102	17.7	44.89	0.884	0.8855	0.9862	0.8907	18.1	4.493	7192.9	744.2	22.5852	3.74	3.71	1.72	2.41	2.38	2.74	2.71	0.99	0.94	0	258.75	0.5	2.745	0.995
23.5263	1411.58	1.99	1.75	0.02	7688.7	6945.3	21424.8	4.4	-39.09	2.733	3.103	17.7	41.63	0.8839	0.8855	0.9863	0.8907	18.2	4.493	7193.1	743.4	22.5852	3.74	3.72	1.73	2.41	2.4	2.74	2.73	0.99	0.94	0	258.76	0.5	2.745	0.995
23.5597	1413.58	1.99	1.75	0.02	7688.8	6945.3	21424.8	4.4	-39.08	2.731	3.101	17.71	39.12	0.8839	0.8856	0.9863	0.8907	18.2	4.493	7193.2	743.4	22.5852	3.74	3.72	1.73	2.41	2.39	2.74	2.72	0.99	0.94	0	258.76	0.5	2.745	0.995
23.593	1415.58	1.99	1.75	0.03	7689.4	6945.3	21425.4	4.4	-39.08	2.728	3.099	17.7	36.9	0.884	0.8856	0.9863	0.8907	17.9	4.493	7193.4	744.1	22.5852	3.74	3.71	1.72	2.41	2.39	2.74	2.72	0.99	0.94	0	258.74	0.5	2.745	0.995
23.6263	1417.58	1.99	1.75	0.03	7689.1	6945.3	21425.1	4.4	-39.08	2.726	3.097	17.7	34.5	0.884	0.8855	0.9863	0.8907	17.9	4.494	7193.3	743.7	22.5852	3.74	3.72	1.73	2.42	2.39	2.75	2.72	0.99	0.94	0	258.77	0.5	2.745	0.995
23.6597	1419.58	2	1.75	0.03	7689.4	6944.8	21424.5	4.4	-39.08	2.724	3.094	17.7	31.18	0.8839	0.8857	0.9862	0.8907	18	4.528	7193	744.6	22.5852	3.75	3.72	1.72	2.42	2.39	2.75	2.72	1	0.95	0	260.7	0.5	2.75	1
23.693	1421.58	2	1.75	0.02	7688.7	6945.3	21424.8	4.4	-39.08	2.721	3.092	17.71	27.52	0.8839	0.8855	0.9863	0.8907	17.8	4.528	7193.1	743.4	22.5852	3.75	3.73	1.73	2.42	2.4	2.75	2.73	1	0.95	0	260.73	0.5	2.75	1
23.7263	1423.58	2.02	1.75	0.03	7688.4	6945.9	21425.5	4.5	-39.08	2.722	3.091	17.7	25.55	0.8839	0.8855	0.9864	0.8906	18.1	4.562	7193.4	742.6	22.5852	3.77	3.74	1.72	2.42	2.39	2.76	2.73	1.01	0.95	0	262.7	0.5	2.76	1.01
23.7597	1425.58	2	1.74	0.03	7688.8	6945.3	21424.8	4.4	-39.08	2.721	3.09	17.7	22.02	0.8839	0.8856	0.9863	0.8907	18	4.527	7193.2	743.4	22.5852	3.75	3.72	1.72	2.41	2.39	2.75	2.72	1	0.94	0	260.71	0.5	2.745	1
23.793	1427.58	1.97	1.75	0.03	7688.4	6945.3	21424.5	4.4	-39.08	2.721	3.089	17.7	19.47	0.8839	0.8855	0.9863	0.8906	18.2	4.459	7193	743.1	22.5852	3.72	3.69	1.72	2.41	2.38	2.74	2.71	0.99	0.93	0	256.81	0.5	2.735	0.985
23.8263	1429.58	1.97	1.75	0.03	7689.1	6944.8	21424.1	4.4	-39.09	2.719	3.088	17.7	16.64	0.8839	0.8856	0.9862	0.8907	17.8	4.459	7192.9	744.3	22.5852	3.72	3.7	1.72	2.41	2.38	2.74	2.71	0.99	0.93	0	256.79	0.5	2.735	0.985
23.8597	1431.58	2	1.74	0.03	7688.7	6944.8	21423.8	4.4	-39.09	2.719	3.087	17.69	14.75	0.8839	0.8855	0.9862	0.8907	18.2	4.527	7192.8	743.9	22.5852	3.74	3.71	1.71	2.41	2.37	2.74	2.71	1	0.94	0	260.7	0.5	2.74	1
23.893	1433.58	2.02	1.74	0.03	7689.1	6944.8	21424.1	4.5	-39.08	2.72	3.088	17.69	13.85	0.8839	0.8856	0.9862	0.8907	18.3	4.561	7192.9	744.3	22.5852	3.76	3.74	1.72	2.42	2.39	2.75	2.73	1.01	0.95	0	262.66	0.5	2.75	1.01
23.9263	1435.58	2.02	1.75	0.03	7688.7	6944.3	21422.8	4.5	-39.08	2.719	3.088	17.68	14.01	0.8839	0.8855	0.9862	0.8907	18	4.562	7192.5	744.4	22.5852	3.77	3.74	1.72	2.42	2.39	2.76	2.73	1.01	0.95	0	262.69	0.5	2.76	1.01
23.9597	1437.58	2	1.74	0.03	7689.1	6944.8	21424.1	4.4	-39.08	2.719	3.088	17.68	14.19	0.8839	0.8856	0.9862	0.8907	18	4.527	7192.9	744.3	22.5852	3.75	3.72	1.71	2.41	2.38	2.75	2.71	1	0.94	0	260.7	0.5	2.745	1
23.993	1439.58	2	1.74	0.03	7688.4	6944.3	21422.4	4.4	-39.08	2.718	3.087	17.68	12.21	0.8839	0.8854	0.9862	0.8906	17.9	4.527	7192.4	744.1	22.5852	3.74	3.72	1.71	2.41	2.38	2.74	2.71	1	0.94	0	260.71	0.5	2.74	1
24.0263	1441.58	2.02	1.74	0.03	7688.7	6944.8	21423.8	4.5	-39.08	2.719	3.088	17.68	11.86	0.8839	0.8855	0.9862	0.8907	18	4.561	7192.8	743.9	22.5852	3.76	3.74	1.72	2.42	2.39	2.75	2.73	1.01	0.95	0	262.67	0.5	2.75	1.01
24.0597	1443.58	2	1.74	0.03	7688.4	6943.8	21421.4	4.4	-39.08	2.719	3.088	17.68	11.95	0.8839	0.8855	0.9861	0.8906	18	4.527	7192	744.6	22.5853	3.75	3.72	1.71	2.41	2.38	2.75	2.71	1	0.94	0	260.72	0.5	2.745	1
24.093	1445.58	2.02	1.74	0.03	7688.4	6943.8	21421.4	4.5	-39.07	2.719	3.087	17.67	12.11	0.8839	0.8855	0.9861	0.8906	18.1	4.561	7192	744.6	22.5853	3.76	3.73	1.71	2.42	2.38	2.75	2.72	1.01	0.95	0	262.68	0.5	2.75	1.01
24.1263	1447.58	2.03	1.74	0.03	7688.7	6943.8	21421.8	4.5	-39.07	2.718	3.086	17.67	12.22	0.8839	0.8855	0.9861	0.8907	18.1	4.595	7192.1	744.9	22.5853	3.78	3.75	1.71	2.42	2.39	2.76	2.73	1.02	0.96	0	264.63	0.5	2.76	1.015
24.1595	1449.57	2	1.74	0.03	7689.1	6943.8	21422.1	4.4	-39.07	2.717	3.086	17.67	12.29	0.8839	0.8856	0.9861	0.8907	17.9	4.527	7192.2	745.3	22.5853	3.75	3.72	1.71	2.41	2.38	2.75	2.71	1	0.94	0	260.7	0.5	2.745	1
24.1928	1451.57	2.02	1.75	0.03	7688.4	6943.8	21421.4	4.5	-39.07	2.717	3.086	17.67	12.34	0.884	0.8853	0.9861	0.8906	17.9	4.562	7192	744.5	22.5853	3.77	3.74	1.72	2.42	2.39	2.76	2.73	1.01	0.95	0	262.7	0.5	2.76	1.01
24.2262	1453.57	2	1.75	0.03	7688.4	6943.3	21420.4	4.4	-39.07	2.717	3.086	17.66	12.37	0.8839	0.8855	0.986	0.8906	18	4.528	7191.7	745.1	22.5853	3.75	3.72	1.72	2.42	2.38	2.75	2.72	1	0.94	0	260.74	0.5	2.75	1
24.2595	1455.57	2.02	1.74	0.06	7689.1	6942.8	21420.1	4.5	-39.08	2.718	3.086	17.66	12.38	0.8839	0.8856	0.9859	0.8907	18.2	4.561	7191.6	746.3	22.5853	3.76	3.7	1.68	2.41	2.35	2.75	2.69	1.01	0.95	0	262.64	0.5	2.75	1.01
24.2928	1457.57	2.02	1.74	0.15	7689.1	6943.3	21421.1	4.5	-39.08	2.717	3.086	17.67	12.39	0.8839	0.8856	0.986	0.8907	17.9	4.561	7191.9	745.8	22.5853	3.76	3.62	1.6	2.42	2.27	2.75	2.61	1.01	0.95	0	262.66	0.5	2.75	1.01
24.3262	1459.57	2.02	1.74	0.22	7689.1	6943.3	21421.1	4.5	-39.08	2.717	3.087	17.66	12.42	0.8839	0.8856	0.986	0.8907	17.8	4.561	7191.9	745.8	22.5853	3.76	3.54	1.52	2.41	2.19	2.75	2.53	1.01	0.95	0	262.64	0.5	2.75	1.01
24.3595	1461.57	2	1.74	0.23	7688.8	6942.3	21418.8	4.4	-39.08	2.717	3.087	17.66	12.43	0.8839	0.8856	0.9859	0.8907	17.8	4.527	7191.1	746.5	22.5853	3.74	3.51	1.51	2.41	2.17	2.74	2.51	1	0.94	0	260.69	0.5	2.74	1
24.3928	1463.57	2	1.74	0.25	7688.4	6942.8	21419.5	4.4	-39.08	2.717	3.086	17.66	12.42	0.8839	0.8854	0.9859	0.8906	17.9	4.527	7191.3	745.6	22.5853	3.74	3.5	1.49	2.41	2.16	2.74	2.5	1	0.94	0	260.71	0.5	2.74	1
24.4262	1465.57	2	1.74	-0.09	7688.4	6943.3	21420.4	4.4	-39.08	2.718	3.087	17.66	12.44	0.8839	0.8855	0.986	0.8906	17.9	4.527	7191.7	745.1	22.5853	3.74	3.83	1.83	2.41	2.5	2.74	2.83	1	0.94	0	260.71	0.5	2.74	1
24.4595	1467.57	1.99	1.74	-0.09	7689.1	6942.8	21420.1	4.4	-39.08	2.717	3.086	17.66	12.45	0.8839	0.8856	0.9859	0.8907	17.9	4.493	7191.6	746.3	22.5853	3.73	3.82	1.83	2.4	2.49	2.73	2.82	0.99	0.94	0	258.72	0.5	2.735	0.995
24.4928	1469.57	2.02	1.74	-0.08	7688.4	6942.3	21418.5	4.5	-39.08	2.717	3.086	17.66	12.44	0.8839	0.8854	0.9859	0.8906	17.8	4.561	7191	746.1	22.5853	3.76	3.84	1.82	2.41	2.5	2.75	2.83	1.01	0.95	0	262.67	0.5	2.75	1.01
24.5262	1471.57	2.02	1.74	-0.08	7688.8	6942.8	21419.8	4.5	-39.08	2.717	3.086	17.66	12.43	0.8839	0.8856	0.9859	0.8907	17.9	4.561	7191.5	746	22.5853	3.76	3.84	1.82	2.41	2.5	2.75	2.83	1.01	0.95	0	262.66	0.5	2.75	1.01
24.5595	1473.57	2.02	1.74	-0.08	7688.7	6942.8	21419.8	4.5	-39.08	2.718	3.086	17.66	12.43	0.8839	0.8855	0.9859	0.8907	18.1	4.561	7191.5	745.9	22.5853	3.75	3.84	1.82	2.41	2.49	2.75	2.83	1.01	0.95	0	262.64	0.5	2.745	1.01
24.5928	1475.57	2	1.74	-0.09	7688.7	6942.8	21419.8	4.4	-39.08	2.718	3.087	17.67	12.43	0.8839	0.8855	0.9859	0.8907	17.9	4.527	7191.5	745.9	22.5853	3.74	3.83	1.82	2.4	2.49	2.74	2.83	1	0.94	0	260.68	0.5	2.74	1
24.6262	1477.57	2	1.74	-0.08	7688.7	6942.8	21419.8	4.4	-39.09	2.717	3.087	17.66	13.06	0.8839	0.8855	0.9859	0.8907	17.8	4.527	7191.5	745.9	22.5853	3.74	3.82	1.82	2.4	2.49	2.74	2.82	1	0.94	0	260.68	0.5	2.74	1
24.6595	1479.57	2	1.74	-0.08	7688.8	6942.3	21418.8	4.4	-39.08	2.718	3.086	17.66	13.84	0.8839	0.8856	0.9859	0.8907	18.1	4.527	7191.1	746.5	22.5853	3.74	3.82	1.82	2.4	2.49	2.74	2.82	1	0.94	0	260.68	0.5	2.74	1
24.6928	1481.57	2	1.74	-0.08	7688.4	6942.3	21418.5	4.4	-39.08	2.717	3.086	17.66	14.8	0.8839	0.8855	0.9859	0.8906	17.9	4.527	7191	746.1	22.5853	3.74	3.82	1.82	2.4	2.49	2.74	2.82	1	0.94	0	260.69	0.5	2.74	1
24.7262	1483.57	1.99	1.74	-0.08	7689.1	6942.3	21419.1	4.4	-39.07	2.717	3.086	17.66	15.71	0.8839	0.8856	0.9859	0.8907	18	4.493	7191.2	746.8	22.5853	3.73	3.81	1.82	2.4	2.48	2.73	2.81	0.99	0.94	0	258.72	0.5	2.735	0.995
24.7595	1485.57	2	1.74	-0.08	7688.4	6941.8	21417.5	4.4	-39.08	2.717	3.086	17.66	16.58	0.8839	0.8855	0.9858	0.8906	18	4.527	7190.7	746.6	22.5854	3.74	3.82	1.81	2.4	2.48	2.74	2.82	1	0.94	0	260.69	0.5	2.74	1
24.7928	1487.57	1.99	1.74	-0.08	7688.8	6941.8	21417.8	4.4	-39.07	2.717	3.086	17.66	17.38	0.8839	0.8856	0.9858	0.8907	18	4.493	7190.8	747	22.5854	3.73	3.81	1.82	2.4	2.49	2.73	2.82	0.99	0.94	0	258.73	0.5	2.735	0.995
24.8262	1489.57	1.99	1.74	-0.08	7688.7	6941.8	21417.8	4.4	-39.08	2.717	3.086	17.66	18.09	0.8839	0.8855	0.9858	0.8907	18	4.493	7190.8	746.9	22.5854	3.73	3.8	1.82	2.4	2.48	2.73	2.81	0.99	0.94	0	258.73	0.5	2.735	0.995
24.8595	1491.57	2.02	1.74	-0.08	7688.8	6941.8	21417.8	4.5	-39.08	2.719	3.086	17.66	18.9	0.8839	0.8856	0.9858	0.8907	18.3	4.561	7190.8	747	22.5854	3.75	3.84	1.82	2.41	2.49	2.75	2.83	1.01	0.95	0	262.64	0.5	2.745	1.01
24.8928	1493.57	1.99	1.74	-0.08	7688.1	6942.3	21418.2	4.4	-39.08	2.717	3.086	17.67	19.77	0.8838	0.8855	0.9859	0.8906	18	4.493	7190.9	745.8	22.5853	3.73	3.81	1.82	2.4	2.48	2.73	2.81	0.99	0.94	0	258.75	0.5	2.735	0.995
24.9262	1495.57	2.03	1.74	-0.08	7689.1	6942.3	21419.1	4.5	-39.08	2.717	3.086	17.66	20.62	0.8839	0.8856	0.9859	0.8907	18	4.595	7191.2	746.8	22.5853	3.77	3.85	1.82	2.41	2.5	2.75	2.84	1.02	0.96	0	264.59	0.5	2.755	1.015
24.9595	1497.57	2	1.74	-0.08	7688.7	6942.3	21418.8	4.4	-39.08	2.717	3.086	17.67	21.6	0.8839	0.8855	0.9859	0.8907	18	4.527	7191.1	746.4	22.5853	3.74	3.81	1.81	2.4	2.48	2.74	2.81	1	0.94	0	260.68	0.5	2.74	1
24.9928	1499.57	2.03	1.74	-0.08	7688.7	6942.3	21418.8	4.5	-39.08	2.717	3.086	17.68	22.55	0.8839	0.8855	0.9859	0.8907	18	4.595	7191.1	746.4	22.5853	3.77	3.85	1.82	2.41	2.5	2.75	2.84	1.02	0.96	0	264.6	0.5	2.755	1.015
25.0262	1501.57	2	1.74	-0.08	7689.1	6942.3	21419.1	4.4	-39.09	2.717	3.087	17.68	23.51	0.8839	0.8856	0.9859	0.8907	17.8	4.527	7191.2	746.8	22.5853	3.74	3.82	1.82	2.4	2.49	2.74	2.82	1	0.94	0	260.67	0.5	2.74	1
25.0595	1503.57	2.02	1.73	-0.08	7688.8	6941.8	21417.8	4.5	-39.09	2.717	3.086	17.68	24.48	0.8839	0.8856	0.9858	0.8907	17.9	4.561	7190.8	747	22.5854	3.75	3.83	1.81	2.4	2.49	2.74	2.82	1.01	0.95	0	262.62	0.5	2.74	1.01
25.0928	1505.57	2	1.74	-0.08	7688.7	6942.3	21418.8	4.4	-39.09	2.717	3.086	17.68	25.56	0.8839	0.8855	0.9859	0.8907	18	4.527	7191.1	746.4	22.5853	3.74	3.82	1.82	2.41	2.49	2.74	2.82	1	0.94	0	260.69	0.5	2.74	1
25.1262	1507.57	2.02	1.74	-0.08	7688.4	6942.3	21418.5	4.5	-39.08	2.717	3.086	17.68	26.38	0.8839	0.8855	0.9859	0.8906	17.9	4.561	7191	746.1	22.5853	3.76	3.84	1.82	2.41	2.5	2.75	2.83	1.01	0.95	0	262.67	0.5	2.75	1.01
25.1595	1509.57	2	1.74	-0.08	7688.4	6941.8	21417.5	4.4	-39.09	2.717	3.086	17.68	27.31	0.8839	0.8855	0.9858	0.8906	18	4.527	7190.7	746.6	22.5854	3.74	3.82	1.82	2.4	2.49	2.74	2.82	1	0.94	0	260.69	0.5	2.74	1
25.1928	1511.57	2.02	1.74	-0.08	7688.4	6942.3	21418.5	4.5	-39.08	2.717	3.086	17.68	28.24	0.8839	0.8854	0.9859	0.8906	17.9	4.561	7191	746.1	22.5853	3.75	3.84	1.82	2.41	2.49	2.75	2.83	1.01	0.95	0	262.65	0.5	2.745	1.01
25.2262	1513.57	2	1.74	-0.08	7688.7	6942.8	21419.8	4.4	-39.08	2.717	3.086	17.68	29.13	0.8839	0.8855	0.9859	0.8907	18	4.527	7191.5	745.9	22.5853	3.74	3.83	1.82	2.41	2.49	2.74	2.83	1	0.94	0	260.69	0.5	2.74	1
25.2595	1515.57	1.97	1.74	-0.08	7688.4	6942.3	21418.5	4.4	-39.09	2.717	3.086	17.69	30.04	0.8839	0.8855	0.9859	0.8906	18	4.459	7191	746.1	22.5853	3.71	3.78	1.81	2.39	2.47	2.72	2.8	0.99	0.93	0	256.77	0.5	2.725	0.985
25.2928	1517.57	1.99	1.74	-0.08	7688.7	6942.3	21418.8	4.4	-39.08	2.717	3.085	17.69	30.94	0.8839	0.8855	0.9859	0.8907	18	4.493	7191.1	746.4	22.5853	3.73	3.8	1.82	2.4	2.48	2.73	2.81	0.99	0.94	0	258.73	0.5	2.735	0.995
25.3262	1519.57	1.99	1.74	-0.08	7689.1	6942.3	21419.1	4.4	-39.08	2.717	3.086	17.69	31.88	0.8839	0.8856	0.9859	0.8907	17.9	4.493	7191.2	746.8	22.5853	3.73	3.81	1.82	2.41	2.48	2.74	2.81	0.99	0.94	0	258.74	0.5	2.735	0.995
25.3595	1521.57	2	1.74	-0.08	7689.4	6942.8	21420.5	4.4	-39.08	2.717	3.086	17.7	32.45	0.8839	0.8857	0.9859	0.8907	17.9	4.527	7191.7	746.6	22.5853	3.74	3.83	1.82	2.41	2.49	2.74	2.83	1	0.94	0	260.67	0.5	2.74	1
25.3928	1523.57	1.97	1.74	-0.08	7688.8	6943.3	21420.8	4.4	-39.08	2.717	3.086	17.69	33.37	0.8839	0.8856	0.986	0.8907	18	4.459	7191.8	745.5	22.5853	3.71	3.79	1.82	2.4	2.48	2.73	2.81	0.99	0.93	0	256.77	0.5	2.725	0.985
25.4262	1525.57	1.99	1.74	-0.08	7688.4	6943.3	21420.4	4.4	-39.08	2.717	3.086	17.69	34.07	0.8839	0.8855	0.986	0.8906	17.9	4.493	7191.7	745.1	22.5853	3.73	3.81	1.82	2.4	2.49	2.73	2.82	0.99	0.94	0	258.74	0.5	2.735	0.995
25.4595	1527.57	1.99	1.74	-0.08	7688.4	6943.3	21420.4	4.4	-39.09	2.717	3.086	17.69	34.79	0.8839	0.8855	0.986	0.8906	17.9	4.493	7191.7	745.1	22.5853	3.73	3.8	1.82	2.4	2.48	2.73	2.81	0.99	0.94	0	258.74	0.5	2.735	0.995
25.4928	1529.57	2.02	1.74	-0.08	7688.7	6943.8	21421.8	4.5	-39.08	2.717	3.086	17.7	35.6	0.8839	0.8855	0.9861	0.8907	18	4.561	7192.1	744.9	22.5853	3.76	3.84	1.82	2.41	2.49	2.75	2.83	1.01	0.95	0	262.66	0.5	2.75	1.01
25.5262	1531.57	2	1.74	-0.08	7688.4	6942.8	21419.5	4.4	-39.09	2.717	3.086	17.7	36.27	0.8839	0.8854	0.9859	0.8906	17.8	4.527	7191.3	745.6	22.5853	3.74	3.83	1.82	2.41	2.49	2.74	2.83	1	0.94	0	260.71	0.5	2.74	1
25.5595	1533.57	2	1.74	-0.08	7688.7	6943.3	21420.8	4.4	-39.09	2.719	3.087	17.7	36.61	0.8839	0.8855	0.986	0.8907	18.1	4.527	7191.8	745.4	22.5853	3.74	3.82	1.81	2.4	2.48	2.74	2.82	1	0.94	0	260.68	0.5	2.74	1
25.5928	1535.57	2.02	1.74	-0.09	7688.4	6943.3	21420.4	4.5	-39.08	2.718	3.086	17.7	37.02	0.8839	0.8854	0.986	0.8906	18.1	4.561	7191.7	745.1	22.5853	3.75	3.84	1.82	2.41	2.5	2.75	2.83	1.01	0.95	0	262.65	0.5	2.745	1.01
25.6262	1537.57	1.99	1.74	-0.08	7689.1	6943.8	21422.1	4.4	-39.09	2.718	3.087	17.7	37.25	0.8839	0.8856	0.9861	0.8907	17.9	4.493	7192.2	745.3	22.5853	3.73	3.81	1.82	2.4	2.49	2.73	2.82	0.99	0.94	0	258.72	0.5	2.735	0.995
25.6595	1539.57	2	1.73	-0.08	7688.4	6943.8	21421.4	4.4	-39.08	2.717	3.086	17.7	37.95	0.8839	0.8855	0.9861	0.8906	17.9	4.527	7192	744.6	22.5853	3.73	3.82	1.81	2.4	2.48	2.73	2.82	1	0.94	0	260.68	0.5	2.73	1
25.6928	1541.57	1.99	1.74	-0.08	7688.4	6943.8	21421.4	4.4	-39.08	2.717	3.086	17.7	38.89	0.8839	0.8855	0.9861	0.8906	17.9	4.493	7192	744.6	22.5853	3.72	3.81	1.82	2.4	2.48	2.73	2.81	0.99	0.94	0	258.73	0.5	2.73	0.995
25.7262	1543.57	1.99	1.74	-0.08	7688.7	6943.3	21420.8	4.4	-39.08	2.717	3.087	17.7	39.79	0.8839	0.8855	0.986	0.8907	17.8	4.493	7191.8	745.4	22.5853	3.72	3.8	1.81	2.4	2.48	2.73	2.81	0.99	0.94	0	258.72	0.5	2.73	0.995
25.7595	1545.57	2	1.74	-0.08	7688.7	6943.8	21421.8	4.4	-39.09	2.718	3.086	17.7	40.8	0.8839	0.8855	0.9861	0.8907	18.1	4.527	7192.1	744.9	22.5853	3.74	3.82	1.82	2.4	2.49	2.74	2.82	1	0.94	0	260.68	0.5	2.74	1
25.7928	1547.57	2.02	1.73	-0.08	7688.4	6944.3	21422.5	4.5	-39.09	2.718	3.086	17.7	41.59	0.8839	0.8855	0.9862	0.8906	18.1	4.561	7192.4	744.1	22.5852	3.75	3.83	1.81	2.4	2.49	2.74	2.82	1.01	0.95	0	262.64	0.5	2.74	1.01
25.8262	1549.57	2	1.74	-0.08	7688.4	6944.3	21422.5	4.4	-39.09	2.719	3.087	17.7	42.36	0.8839	0.8855	0.9862	0.8906	18.1	4.527	7192.4	744.1	22.5852	3.74	3.83	1.82	2.41	2.49	2.74	2.83	1	0.94	0	260.71	0.5	2.74	1
25.8595	1551.57	2	1.73	-0.09	7689.1	6944.3	21423.1	4.4	-39.09	2.718	3.087	17.7	43.2	0.8839	0.8856	0.9862	0.8907	17.9	4.527	7192.6	744.8	22.5852	3.73	3.82	1.82	2.4	2.49	2.73	2.82	1	0.94	0	260.65	0.5	2.73	1
25.8928	1553.57	2	1.73	-0.09	7688.1	6943.8	21421.1	4.4	-39.09	2.719	3.087	17.7	44.02	0.8839	0.8854	0.9861	0.8906	18.1	4.526	7191.9	744.3	22.5853	3.73	3.82	1.82	2.39	2.49	2.73	2.82	1	0.94	0	260.67	0.5	2.73	1
25.9262	1555.57	1.97	1.73	-0.08	7689.1	6943.8	21422.1	4.4	-39.1	2.717	3.087	17.7	44.87	0.8839	0.8856	0.9861	0.8907	17.8	4.458	7192.2	745.3	22.5853	3.7	3.79	1.81	2.39	2.47	2.72	2.8	0.99	0.93	0	256.73	0.5	2.715	0.985
25.9595	1557.57	1.99	1.73	-0.08	7688.8	6944.3	21422.8	4.4	-39.09	2.718	3.087	17.7	45.64	0.8839	0.8856	0.9862	0.8907	17.9	4.492	7192.5	744.4	22.5852	3.72	3.8	1.81	2.39	2.48	2.73	2.81	0.99	0.94	0	258.7	0.5	2.725	0.995
25.9928	1559.57	2	1.73	-0.08	7688.7	6944.3	21422.8	4.4	-39.09	2.717	3.087	17.7	46.53	0.8839	0.8855	0.9862	0.8907	17.8	4.527	7192.5	744.4	22.5852	3.73	3.81	1.81	2.4	2.47	2.73	2.81	1	0.94	0	260.67	0.5	2.73	1
26.0262	1561.57	1.99	1.74	-0.08	7688.8	6943.8	21421.8	4.4	-39.09	2.718	3.088	17.7	47.3	0.8839	0.8856	0.9861	0.8907	17.7	4.493	7192.1	744.9	22.5853	3.72	3.8	1.81	2.4	2.47	2.73	2.81	0.99	0.94	0	258.72	0.5	2.73	0.995
26.0595	1563.57	1.97	1.73	-0.08	7689.1	6943.8	21422.1	4.4	-39.09	2.718	3.087	17.7	48.15	0.8839	0.8856	0.9861	0.8907	17.9	4.458	7192.2	745.3	22.5853	3.7	3.78	1.81	2.39	2.46	2.72	2.79	0.99	0.93	0	256.73	0.5	2.715	0.985
26.0928	1565.57	1.97	1.73	-0.08	7688.7	6943.8	21421.8	4.4	-39.09	2.718	3.087	17.7	49.03	0.8839	0.8855	0.9861	0.8907	17.9	4.458	7192.1	744.9	22.5853	3.7	3.78	1.81	2.39	2.46	2.72	2.79	0.99	0.93	0	256.74	0.5	2.715	0.985
26.1262	1567.57	1.99	1.73	-0.07	7688.7	6944.3	21422.8	4.4	-39.08	2.718	3.088	17.69	49.86	0.8839	0.8855	0.9862	0.8907	17.8	4.492	7192.5	744.4	22.5852	3.72	3.79	1.8	2.39	2.46	2.73	2.8	0.99	0.94	0	258.7	0.5	2.725	0.995
26.1595	1569.57	2.02	1.73	-0.07	7688.7	6943.8	21421.8	4.5	-39.08	2.718	3.088	17.69	50.59	0.8839	0.8855	0.9861	0.8907	17.7	4.561	7192.1	744.9	22.5853	3.75	3.82	1.8	2.4	2.47	2.74	2.81	1.01	0.95	0	262.63	0.5	2.74	1.01
26.1928	1571.57	2	1.73	-0.07	7688.7	6943.8	21421.8	4.4	-39.09	2.718	3.087	17.69	51.49	0.8839	0.8855	0.9861	0.8907	17.9	4.527	7192.1	744.9	22.5853	3.73	3.81	1.8	2.4	2.47	2.73	2.8	1	0.94	0	260.66	0.5	2.73	1
26.2262	1573.57	1.97	1.73	-0.07	7688.8	6943.8	21421.8	4.4	-39.09	2.719	3.088	17.7	52.45	0.8839	0.8856	0.9861	0.8907	18	4.458	7192.1	744.9	22.5853	3.7	3.77	1.8	2.39	2.46	2.72	2.78	0.99	0.93	0	256.74	0.5	2.715	0.985
26.2595	1575.57	1.99	1.73	-0.07	7688.8	6943.8	21421.8	4.4	-39.1	2.719	3.088	17.7	53.43	0.8839	0.8856	0.9861	0.8907	18	4.492	7192.1	744.9	22.5853	3.72	3.78	1.79	2.39	2.46	2.72	2.79	0.99	0.94	0	258.69	0.5	2.725	0.995
26.2928	1577.57	1.97	1.72	-0.06	7688.7	6942.8	21419.8	4.4	-39.09	2.719	3.087	17.69	54.38	0.8839	0.8855	0.9859	0.8907	18.2	4.458	7191.5	745.9	22.5853	3.7	3.75	1.78	2.38	2.44	2.71	2.77	0.99	0.93	0	256.71	0.5	2.71	0.985
26.3262	1579.57	2	1.73	-0.05	7689.1	6943.3	21421.1	4.4	-39.09	2.719	3.088	17.69	55.22	0.8839	0.8856	0.986	0.8907	17.8	4.526	7191.9	745.8	22.5853	3.73	3.78	1.78	2.39	2.45	2.73	2.78	1	0.94	0	260.64	0.5	2.73	1
26.3593	1581.56	1.97	1.73	-0.05	7688.7	6942.3	21418.8	4.4	-39.08	2.719	3.088	17.69	56.02	0.8839	0.8855	0.9859	0.8907	17.8	4.458	7191.1	746.4	22.5853	3.7	3.75	1.78	2.38	2.44	2.71	2.77	0.99	0.93	0	256.73	0.5	2.715	0.985
26.3927	1583.56	1.97	1.72	-0.05	7688.7	6942.3	21418.8	4.4	-39.08	2.719	3.088	17.69	56.83	0.8839	0.8855	0.9859	0.8907	18	4.458	7191.1	746.4	22.5853	3.7	3.75	1.78	2.38	2.43	2.71	2.76	0.99	0.93	0	256.71	0.5	2.71	0.985
26.426	1585.56	1.99	1.72	-0.04	7688.7	6965.1	21463.6	4.4	-39.09	2.719	3.088	17.68	57.73	0.8839	0.8855	0.9891	0.8907	18	4.492	7206.3	723.7	22.5843	3.71	3.75	1.76	2.38	2.42	2.72	2.75	0.99	0.94	0	258.68	0.5	2.715	0.995
26.4593	1587.56	1.99	1.7	-0.04	7688.7	7003.5	21539.4	4.4	-39.09	2.718	3.089	17.63	58.74	0.8839	0.8855	0.9946	0.8907	17.6	4.491	7231.9	685.2	22.5825	3.69	3.73	1.74	2.37	2.41	2.7	2.74	0.99	0.94	0	258.64	0.5	2.695	0.995
26.4927	1589.56	2.02	1.67	-0.04	7689.1	7068.7	21668.3	4.5	-39.09	2.717	3.09	17.5	59.26	0.8839	0.8856	1.0038	0.8907	17.3	4.557	7275.5	620.4	22.5796	3.68	3.73	1.71	2.34	2.38	2.68	2.72	1.01	0.95	0	262.47	0.5	2.675	1.01
26.526	1591.56	2.05	1.58	-0.05	7689.8	7222.4	21971.8	4.5	-39.1	2.716	3.092	17.15	59.27	0.8839	0.8857	1.0257	0.8908	16.6	4.62	7378.2	467.4	22.5726	3.62	3.67	1.62	2.26	2.31	2.6	2.65	1.02	0.96	0	266.17	0.5	2.6	1.025
26.5593	1593.56	2.12	1.44	-0.04	7690.1	7254.8	22035.8	4.7	-39.1	2.711	3.094	16.54	59.41	0.884	0.8857	1.0302	0.8908	15.1	4.783	7399.9	435.3	22.5711	3.56	3.6	1.49	2.15	2.19	2.5	2.55	1.06	1	0	275.55	0.5	2.5	1.06
26.5927	1595.56	2.15	1.3	-0.05	7690.1	7192.1	21912.4	4.8	-39.1	2.709	3.097	15.83	59.36	0.8839	0.8858	1.0213	0.8908	13.9	4.843	7358.1	498	22.574	3.45	3.49	1.35	2.02	2.06	2.37	2.42	1.07	1.01	0	278.97	0.5	2.375	1.075
26.626	1597.56	2.22	1.17	-0.05	7690.5	7093.5	21718.5	4.9	-39.1	2.705	3.101	15.11	59.32	0.8839	0.8859	1.0073	0.8909	12.2	5.006	7292.5	597	22.5784	3.39	3.43	1.22	1.91	1.96	2.28	2.33	1.11	1.05	0	288.29	0.5	2.28	1.11
26.6593	1599.56	2.23	1.05	-0.05	7689.5	6984.8	21503.2	5	-39.11	2.703	3.104	14.45	59.27	0.8839	0.8857	0.9919	0.8907	11.4	5.033	7219.7	704.7	22.5834	3.27	3.32	1.09	1.79	1.83	2.16	2.21	1.11	1.05	0	289.82	0.5	2.16	1.115
26.6927	1601.56	2.24	0.95	-0.05	7689.1	6885.2	21306.5	5	-39.11	2.701	3.107	13.89	59.24	0.8839	0.8857	0.9778	0.8907	10.4	5.062	7153.1	804	22.5879	3.19	3.24	1	1.7	1.75	2.07	2.12	1.12	1.06	0	291.43	0.5	2.07	1.12
26.726	1603.56	2.25	0.89	-0.05	7688.8	6804.7	21147.6	5	-39.11	2.701	3.11	13.45	59.22	0.8839	0.8856	0.9663	0.8907	9.8	5.092	7099.4	884.1	22.5916	3.15	3.2	0.95	1.64	1.7	2.02	2.07	1.13	1.06	0	293.16	0.5	2.02	1.125
26.7593	1605.56	2.25	0.85	-0.06	7688.4	6746.5	21032.6	5	-39.11	2.702	3.111	13.17	59.21	0.8839	0.8855	0.9581	0.8906	9.8	5.09	7060.5	941.9	22.5942	3.1	3.16	0.91	1.6	1.66	1.97	2.03	1.13	1.06	0	292.99	0.5	1.975	1.125
26.7927	1607.56	2.24	0.83	-0.06	7687.7	6717.2	20974	5	-39.11	2.701	3.112	13.02	59.2	0.8839	0.8853	0.9539	0.8905	9.4	5.055	7040.7	970.6	22.5956	3.07	3.12	0.89	1.57	1.63	1.95	2.01	1.12	1.05	0	290.98	0.5	1.95	1.12
26.826	1609.56	2.24	0.84	-0.05	7687.7	6712.6	20965	5	-39.11	2.702	3.113	13	59.19	0.8839	0.8853	0.9533	0.8905	9.4	5.055	7037.7	975.1	22.5958	3.07	3.13	0.89	1.58	1.64	1.96	2.01	1.12	1.05	0	291.01	0.5	1.955	1.12
26.8593	1611.56	2.22	0.85	-0.05	7687.7	6726.3	20992	5	-39.11	2.702	3.111	13.07	59.77	0.8839	0.8853	0.9552	0.8905	9.7	5.022	7046.8	961.5	22.5952	3.07	3.13	0.91	1.59	1.65	1.96	2.02	1.11	1.05	0	289.1	0.5	1.96	1.11
26.8927	1613.56	2.18	0.88	-0.05	7687.7	6756.6	21051.8	4.9	-39.11	2.703	3.111	13.23	60.24	0.8839	0.8853	0.9595	0.8905	10.1	4.921	7067	931.1	22.5938	3.06	3.11	0.93	1.61	1.66	1.97	2.02	1.09	1.03	0	283.32	0.5	1.97	1.09
26.926	1615.56	2.16	0.92	-0.04	7688.4	6800.2	21138.3	4.8	-39.11	2.705	3.111	13.43	60.72	0.884	0.8853	0.9657	0.8906	10.3	4.889	7096.2	888.2	22.5918	3.08	3.12	0.96	1.64	1.68	2	2.04	1.08	1.02	0	281.48	0.5	2	1.08
26.9593	1617.56	2.14	0.95	-0.05	7687.7	6850.8	21237.3	4.8	-39.12	2.706	3.111	13.64	60.81	0.8839	0.8853	0.9729	0.8905	10.7	4.823	7129.7	837	22.5895	3.08	3.13	1	1.66	1.71	2.02	2.07	1.07	1.01	0	277.72	0.5	2.015	1.07
26.9927	1619.56	2.15	0.98	-0.05	7687.7	6903.4	21341	4.8	-39.12	2.707	3.11	13.84	60.8	0.8839	0.8853	0.9803	0.8905	11	4.859	7164.8	784.3	22.5871	3.13	3.18	1.03	1.69	1.75	2.05	2.11	1.08	1.01	0	279.8	0.5	2.055	1.075
27.026	1621.56	2.14	1	-0.05	7688.4	6950.9	21435.4	4.8	-39.12	2.708	3.109	13.98	60.78	0.8839	0.8854	0.9871	0.8906	11.6	4.826	7196.7	737.5	22.5849	3.14	3.19	1.05	1.71	1.77	2.07	2.12	1.07	1.01	0	277.92	0.5	2.07	1.07
27.0593	1623.56	2.14	1.02	-0.05	7688.7	6988.3	21509.4	4.8	-39.11	2.708	3.109	14.06	60.76	0.884	0.8854	0.9924	0.8907	11.6	4.827	7221.8	700.4	22.5832	3.16	3.21	1.07	1.73	1.78	2.09	2.14	1.07	1.01	0	277.99	0.5	2.09	1.07
27.0927	1625.56	2.15	1.02	-0.05	7688.7	7015.1	21562.3	4.8	-39.11	2.707	3.108	14.09	60.74	0.884	0.8854	0.9962	0.8907	11.5	4.861	7239.7	673.6	22.582	3.18	3.23	1.08	1.74	1.79	2.1	2.15	1.08	1.01	0	279.98	0.5	2.1	1.075
27.126	1627.56	2.12	1.02	-0.05	7689.8	7031.3	21595.2	4.7	-39.11	2.706	3.108	14.06	61.09	0.884	0.8857	0.9985	0.8908	11.2	4.793	7250.8	658.4	22.5813	3.14	3.19	1.07	1.73	1.78	2.08	2.13	1.06	1	0	276.01	0.5	2.08	1.06
27.1593	1629.56	2.06	1	-0.05	7690.8	7036.4	21606.2	4.6	-39.11	2.704	3.108	13.98	61.84	0.8839	0.886	0.9992	0.8909	10.8	4.655	7254.5	654.4	22.581	3.06	3.11	1.05	1.69	1.73	2.03	2.08	1.03	0.97	0	268.07	0.5	2.03	1.03
27.1927	1631.56	2.05	0.97	-0.04	7689.6	7035.9	21604	4.6	-39.12	2.701	3.11	13.86	62.67	0.8843	0.8853	0.9992	0.8908	9.6	4.62	7253.8	653.8	22.5811	3.02	3.06	1.01	1.65	1.7	1.99	2.04	1.02	0.96	0	266.06	0.5	1.995	1.025
27.226	1633.56	2.09	0.94	-0.04	7688.7	7025.8	21583.2	4.7	-39.12	2.701	3.111	13.69	63.63	0.885	0.8845	0.9977	0.8907	9.4	4.72	7246.7	662.9	22.5815	3.03	3.07	0.98	1.64	1.67	1.98	2.02	1.05	0.99	0	271.86	0.5	1.985	1.045
27.2593	1635.56	2.06	0.9	-0.03	7688.8	7009.1	21550.4	4.6	-39.12	2.7	3.112	13.5	64.36	0.8856	0.8839	0.9954	0.8907	9.1	4.65	7235.7	679.8	22.5823	2.96	2.99	0.94	1.59	1.62	1.93	1.97	1.03	0.97	0	267.81	0.5	1.93	1.03
27.2927	1637.56	2.1	0.87	-0.03	7688.3	6988.3	21509.1	4.7	-39.12	2.7	3.112	13.31	65.26	0.886	0.8833	0.9924	0.8906	9.1	4.751	7221.7	700	22.5832	2.98	3	0.9	1.58	1.6	1.93	1.95	1.05	0.99	0	273.61	0.5	1.925	1.05
27.326	1639.56	2.1	0.85	-0.03	7688.6	6966.1	21465.5	4.7	-39.12	2.699	3.113	13.12	66.19	0.8863	0.8831	0.9892	0.8906	8.7	4.749	7206.9	722.5	22.5842	2.95	2.97	0.87	1.55	1.57	1.9	1.92	1.05	0.99	0	273.5	0.5	1.9	1.05
27.3593	1641.56	2.09	0.81	-0.02	7689.5	6945.3	21425.5	4.7	-39.12	2.699	3.113	12.95	67.03	0.8866	0.883	0.9863	0.8907	8.5	4.713	7193.4	744.1	22.5852	2.9	2.92	0.83	1.51	1.53	1.86	1.87	1.04	0.98	0	271.39	0.5	1.855	1.045
27.3927	1643.56	2.1	0.79	-0.01	7688.7	6926.6	21387.8	4.7	-39.12	2.699	3.114	12.79	67.85	0.8868	0.8826	0.9836	0.8907	8.4	4.746	7180.7	762.1	22.586	2.89	2.91	0.8	1.49	1.5	1.84	1.85	1.05	0.99	0	273.29	0.5	1.84	1.05
27.426	1645.56	2.1	0.78	-0.01	7689	6912	21359.2	4.7	-39.12	2.699	3.115	12.68	68.55	0.8869	0.8826	0.9816	0.8907	8.3	4.745	7171	777.1	22.5867	2.88	2.89	0.79	1.48	1.49	1.83	1.84	1.05	0.99	0	273.24	0.5	1.83	1.05
27.4593	1647.56	2.1	0.76	0	7688.7	6902.4	21339.9	4.7	-39.13	2.699	3.117	12.6	69.22	0.887	0.8825	0.9802	0.8907	8.1	4.744	7164.5	786.3	22.5871	2.86	2.87	0.77	1.46	1.47	1.81	1.82	1.05	0.99	0	273.19	0.5	1.81	1.05
27.4927	1649.56	2.09	0.75	0	7688.6	6901.3	21337.9	4.7	-39.13	2.699	3.117	12.54	69.84	0.887	0.8824	0.9801	0.8907	7.9	4.71	7163.8	787.3	22.5872	2.84	2.84	0.75	1.45	1.45	1.8	1.8	1.04	0.98	0	271.2	0.5	1.795	1.045
27.526	1651.56	2.09	0.75	0	7688.3	6903.4	21341.5	4.7	-39.13	2.7	3.117	12.49	70.42	0.8871	0.8822	0.9803	0.8906	8.2	4.709	7165	784.9	22.5871	2.83	2.83	0.75	1.44	1.44	1.79	1.79	1.04	0.98	0	271.19	0.5	1.79	1.045
27.5593	1653.56	2.1	0.75	0	7688.2	6907.4	21349.5	4.7	-39.14	2.699	3.117	12.47	70.84	0.8872	0.8822	0.9809	0.8906	7.9	4.743	7167.7	780.8	22.5869	2.85	2.85	0.75	1.45	1.45	1.8	1.8	1.05	0.99	0	273.14	0.5	1.8	1.05
27.5927	1655.56	2.1	0.74	0	7688.6	6915.5	21365.8	4.7	-39.13	2.699	3.117	12.45	70.84	0.8872	0.8822	0.9821	0.8906	7.9	4.743	7173.2	773.1	22.5865	2.84	2.84	0.74	1.44	1.44	1.79	1.79	1.05	0.99	0	273.12	0.5	1.79	1.05
27.626	1657.56	2.07	0.75	0	7688.5	6924.6	21383.7	4.6	-39.13	2.699	3.117	12.43	70.77	0.8873	0.8822	0.9834	0.8906	7.9	4.675	7179.3	763.9	22.5861	2.81	2.81	0.75	1.44	1.44	1.78	1.78	1.03	0.98	0	269.22	0.5	1.78	1.035
27.6593	1659.56	2.08	0.74	-0.01	7688.5	6933.2	21400.6	4.7	-39.14	2.7	3.117	12.41	70.72	0.8873	0.8821	0.9846	0.8906	8.1	4.709	7185	755.3	22.5857	2.82	2.83	0.75	1.43	1.44	1.78	1.79	1.04	0.98	0	271.16	0.5	1.78	1.04
27.6927	1661.56	2.05	0.74	-0.01	7688.8	6940.3	21414.9	4.6	-39.13	2.7	3.117	12.39	70.69	0.8874	0.8821	0.9856	0.8907	8.1	4.641	7189.8	748.5	22.5854	2.8	2.8	0.75	1.43	1.43	1.77	1.78	1.03	0.97	0	267.24	0.5	1.77	1.025
27.726	1663.56	2.05	0.74	-0.01	7688.5	6946.9	21427.5	4.6	-39.14	2.699	3.118	12.36	70.65	0.8874	0.882	0.9865	0.8906	7.8	4.641	7194.1	741.6	22.5851	2.79	2.8	0.75	1.42	1.43	1.76	1.78	1.03	0.97	0	267.24	0.5	1.765	1.025
27.7593	1665.56	2.07	0.73	-0.02	7688.8	6949.4	21432.9	4.6	-39.14	2.699	3.117	12.32	70.64	0.8874	0.8821	0.9869	0.8907	8.1	4.674	7195.9	739.4	22.585	2.8	2.82	0.75	1.42	1.44	1.77	1.78	1.03	0.98	0	269.18	0.5	1.765	1.035
27.7927	1667.56	2.07	0.72	-0.02	7689.1	6951.4	21437.1	4.6	-39.13	2.699	3.117	12.28	70.63	0.8875	0.882	0.9872	0.8907	7.9	4.674	7197.3	737.7	22.5849	2.79	2.81	0.74	1.41	1.43	1.76	1.78	1.03	0.98	0	269.14	0.5	1.755	1.035
27.826	1669.56	2.08	0.72	-0.02	7688.5	6951.4	21436.4	4.7	-39.13	2.699	3.117	12.23	70.69	0.8875	0.8819	0.9872	0.8906	7.8	4.708	7197.1	737	22.5849	2.8	2.82	0.74	1.41	1.43	1.76	1.78	1.04	0.98	0	271.11	0.5	1.76	1.04
27.8593	1671.56	2.07	0.71	-0.03	7688.8	6949.9	21433.7	4.6	-39.13	2.699	3.117	12.19	70.87	0.8875	0.8819	0.987	0.8907	7.8	4.673	7196.2	738.9	22.585	2.78	2.8	0.73	1.4	1.42	1.74	1.77	1.03	0.98	0	269.1	0.5	1.745	1.035
27.8927	1673.56	2.07	0.7	-0.03	7688.4	6946.9	21427.4	4.6	-39.13	2.699	3.117	12.14	71.24	0.8875	0.8818	0.9865	0.8906	7.9	4.672	7194.1	741.6	22.5851	2.77	2.79	0.72	1.39	1.41	1.73	1.76	1.03	0.98	0	269.08	0.5	1.735	1.035
27.926	1675.56	2.04	0.7	-0.02	7688.4	6943.3	21420.4	4.6	-39.13	2.698	3.117	12.09	71.61	0.8876	0.8818	0.986	0.8906	7.6	4.604	7191.7	745.1	22.5853	2.74	2.76	0.72	1.38	1.4	1.72	1.74	1.02	0.96	0	265.16	0.5	1.72	1.02
27.9593	1677.56	2.05	0.68	-0.02	7688.7	6940.3	21414.8	4.6	-39.14	2.698	3.117	12.06	72.1	0.8877	0.8818	0.9856	0.8907	7.6	4.638	7189.8	748.4	22.5854	2.74	2.76	0.71	1.37	1.39	1.71	1.73	1.03	0.97	0	267.06	0.5	1.71	1.025
27.9927	1679.56	2.08	0.68	-0.02	7688.4	6936.7	21407.4	4.7	-39.15	2.699	3.119	12.02	72.76	0.8877	0.8817	0.9851	0.8906	7.5	4.706	7187.3	751.6	22.5856	2.77	2.79	0.7	1.38	1.4	1.73	1.74	1.04	0.98	0	271	0.5	1.725	1.04
28.026	1681.56	2.07	0.68	-0.01	7689	6933.2	21401.1	4.6	-39.16	2.699	3.119	11.99	73.24	0.8878	0.8818	0.9846	0.8907	7.5	4.671	7185.2	755.8	22.5857	2.75	2.76	0.69	1.37	1.38	1.71	1.73	1.03	0.98	0	269	0.5	1.715	1.035
28.0593	1683.56	2.07	0.67	-0.02	7688.7	6932.7	21399.8	4.6	-39.15	2.699	3.119	11.97	73.55	0.8878	0.8817	0.9845	0.8907	7.5	4.671	7184.7	756	22.5858	2.74	2.76	0.69	1.36	1.38	1.71	1.72	1.03	0.97	0	268.98	0.5	1.705	1.035
28.0927	1685.56	2.07	0.68	-0.02	7688.3	6933.2	21400.4	4.6	-39.15	2.698	3.119	11.95	73.68	0.8878	0.8815	0.9846	0.8906	7.4	4.671	7184.9	755.1	22.5857	2.74	2.76	0.69	1.37	1.38	1.71	1.73	1.03	0.97	0	269.01	0.5	1.71	1.035
28.126	1687.56	2.05	0.68	-0.01	7689	6933.7	21402.1	4.6	-39.14	2.698	3.119	11.93	73.98	0.8879	0.8816	0.9847	0.8907	7.4	4.637	7185.5	755.3	22.5857	2.73	2.74	0.69	1.36	1.37	1.7	1.71	1.03	0.97	0	267.02	0.5	1.705	1.025
28.1593	1689.56	2.04	0.67	-0.02	7689	6935.7	21406.1	4.6	-39.14	2.699	3.119	11.92	74.2	0.8879	0.8816	0.9849	0.8907	7.5	4.603	7186.8	753.3	22.5856	2.71	2.73	0.69	1.35	1.37	1.69	1.71	1.02	0.96	0	265.04	0.5	1.69	1.02
28.1927	1691.56	2.04	0.67	-0.01	7688.6	6937.8	21409.7	4.6	-39.14	2.698	3.118	11.9	74.49	0.8879	0.8815	0.9852	0.8907	7.5	4.603	7188.1	750.9	22.5855	2.71	2.72	0.68	1.35	1.36	1.69	1.7	1.02	0.96	0	265.06	0.5	1.69	1.02
28.226	1693.56	2.05	0.68	-0.01	7688.3	6941.3	21416.4	4.6	-39.14	2.698	3.119	11.89	74.52	0.8879	0.8814	0.9857	0.8906	7.4	4.637	7190.3	747	22.5854	2.73	2.74	0.69	1.36	1.37	1.7	1.71	1.03	0.97	0	267.05	0.5	1.705	1.025
28.2593	1695.56	2.01	0.67	-0.02	7688.6	6943.3	21420.6	4.5	-39.14	2.698	3.118	11.88	74.69	0.888	0.8814	0.986	0.8906	7.5	4.535	7191.8	745.3	22.5853	2.68	2.7	0.69	1.34	1.36	1.67	1.69	1	0.95	0	261.14	0.5	1.675	1.005
28.2927	1697.56	2.05	0.66	-0.02	7688.2	6945.9	21425.3	4.6	-39.14	2.699	3.119	11.86	74.74	0.8881	0.8813	0.9864	0.8906	7.5	4.636	7193.3	742.4	22.5852	2.71	2.74	0.68	1.35	1.37	1.69	1.71	1.03	0.97	0	267.01	0.5	1.685	1.025
28.326	1699.56	2.02	0.67	-0.02	7688.9	6947.4	21428.9	4.5	-39.15	2.699	3.119	11.84	75.04	0.8881	0.8814	0.9866	0.8907	7.5	4.568	7194.5	741.5	22.5851	2.69	2.71	0.69	1.34	1.36	1.68	1.7	1.01	0.95	0	263.08	0.5	1.68	1.01
28.3593	1701.56	2.02	0.66	-0.02	7688.9	6946.9	21427.9	4.5	-39.14	2.699	3.119	11.82	75.79	0.8882	0.8813	0.9865	0.8907	7.5	4.568	7194.2	742	22.5851	2.68	2.7	0.68	1.34	1.35	1.67	1.69	1.01	0.95	0	263.06	0.5	1.67	1.01
28.3927	1703.56	2.01	0.66	0	7688.6	6946.4	21426.6	4.5	-39.14	2.698	3.119	11.79	76.59	0.8881	0.8813	0.9864	0.8906	7.4	4.534	7193.8	742.2	22.5851	2.66	2.67	0.66	1.33	1.33	1.66	1.67	1	0.95	0	261.1	0.5	1.66	1.005
28.426	1705.56	1.99	0.65	0	7688.2	6945.9	21425.3	4.5	-39.15	2.698	3.119	11.77	77.39	0.8881	0.8812	0.9864	0.8906	7.2	4.5	7193.3	742.4	22.5852	2.64	2.64	0.65	1.32	1.32	1.65	1.65	1	0.94	0	259.13	0.5	1.645	0.995
28.4593	1707.56	2.04	0.65	0.01	7688.9	6943.8	21421.9	4.6	-39.15	2.698	3.119	11.75	78.04	0.8883	0.8812	0.9861	0.8907	7.2	4.601	7192.2	745	22.5853	2.69	2.68	0.64	1.33	1.32	1.67	1.66	1.02	0.96	0	264.98	0.5	1.67	1.02
28.4927	1709.56	2.04	0.65	0.01	7688.5	6943.3	21420.5	4.6	-39.15	2.698	3.12	11.73	78.6	0.8882	0.8812	0.986	0.8906	7.1	4.601	7191.7	745.2	22.5853	2.69	2.68	0.64	1.33	1.32	1.67	1.66	1.02	0.96	0	264.99	0.5	1.67	1.02
28.526	1711.56	2.02	0.65	0	7688.9	6943.3	21420.9	4.5	-39.15	2.699	3.119	11.71	78.69	0.8883	0.8812	0.986	0.8907	7.4	4.567	7191.8	745.5	22.5853	2.67	2.67	0.64	1.32	1.32	1.66	1.65	1.01	0.95	0	263.02	0.5	1.66	1.01
28.5592	1713.55	2.02	0.64	0	7688.5	6943.8	21421.5	4.5	-39.14	2.698	3.12	11.68	78.65	0.8884	0.881	0.9861	0.8906	7.1	4.567	7192	744.7	22.5853	2.66	2.66	0.64	1.31	1.31	1.65	1.65	1.01	0.95	0	263	0.5	1.65	1.01
28.5925	1715.55	2.01	0.64	-0.01	7689.2	6944.3	21423.2	4.5	-39.15	2.699	3.12	11.66	78.6	0.8884	0.8812	0.9862	0.8907	7.3	4.533	7192.6	744.8	22.5852	2.65	2.65	0.65	1.31	1.32	1.64	1.65	1	0.95	0	261.01	0.5	1.645	1.005
28.6258	1717.55	1.99	0.64	0	7688.9	6945.3	21424.9	4.5	-39.15	2.698	3.12	11.63	78.9	0.8883	0.8812	0.9863	0.8907	7.1	4.499	7193.2	743.5	22.5852	2.63	2.63	0.64	1.3	1.31	1.63	1.64	1	0.94	0	259.06	0.5	1.635	0.995
28.6592	1719.55	2.01	0.63	0	7689.2	6944.8	21424.2	4.5	-39.15	2.697	3.12	11.61	79.34	0.8884	0.8812	0.9862	0.8907	7	4.533	7192.9	744.3	22.5852	2.64	2.65	0.64	1.3	1.31	1.64	1.64	1	0.95	0	261	0.5	1.635	1.005
28.6925	1721.55	2.01	0.63	0	7688.5	6943.8	21421.5	4.5	-39.15	2.697	3.119	11.58	79.9	0.8884	0.881	0.9861	0.8906	7.1	4.532	7192	744.7	22.5853	2.64	2.63	0.63	1.3	1.29	1.63	1.63	1	0.95	0	261.01	0.5	1.635	1.005
28.7258	1723.55	2.01	0.63	0.01	7688.5	6942.8	21419.5	4.5	-39.14	2.697	3.119	11.56	80.54	0.8884	0.881	0.9859	0.8906	7.2	4.532	7191.4	745.7	22.5853	2.64	2.62	0.62	1.3	1.29	1.63	1.62	1	0.95	0	261.01	0.5	1.635	1.005
28.7592	1725.55	1.99	0.62	0.02	7688.8	6940.8	21415.8	4.5	-39.14	2.697	3.119	11.53	81.14	0.8884	0.881	0.9857	0.8907	7.2	4.498	7190.1	748	22.5854	2.62	2.6	0.61	1.29	1.27	1.62	1.6	1	0.94	0	259.02	0.5	1.62	0.995
28.7925	1727.55	1.99	0.62	0.01	7688.1	6939.3	21412.2	4.5	-39.15	2.697	3.119	11.52	81.63	0.8884	0.881	0.9854	0.8906	7.1	4.498	7188.9	748.9	22.5855	2.61	2.6	0.61	1.28	1.27	1.62	1.6	1	0.94	0	259.02	0.5	1.615	0.995
28.8258	1729.55	1.99	0.63	0.03	7689.1	6939.8	21414.1	4.5	-39.14	2.697	3.119	11.5	82.15	0.8885	0.881	0.9855	0.8907	7.1	4.498	7189.6	749.3	22.5854	2.62	2.6	0.6	1.29	1.27	1.63	1.6	1	0.94	0	259.02	0.5	1.625	0.995
28.8592	1731.55	1.98	0.62	0.01	7688.5	6939.8	21413.5	4.4	-39.15	2.697	3.12	11.48	82.3	0.8884	0.881	0.9855	0.8906	7	4.464	7189.3	748.7	22.5854	2.6	2.58	0.61	1.28	1.27	1.61	1.6	0.99	0.93	0	257.05	0.5	1.61	0.99
28.8925	1733.55	1.99	0.62	0.02	7688.4	6939.8	21413.5	4.5	-39.15	2.697	3.119	11.47	82.66	0.8885	0.8809	0.9855	0.8906	7.1	4.497	7189.3	748.6	22.5854	2.61	2.59	0.6	1.28	1.26	1.61	1.59	1	0.94	0	259	0.5	1.615	0.995
28.9258	1735.55	2.01	0.62	0.01	7688.7	6941.3	21416.8	4.5	-39.14	2.697	3.119	11.44	82.79	0.8886	0.8809	0.9857	0.8907	7.1	4.532	7190.4	747.4	22.5854	2.62	2.61	0.6	1.28	1.27	1.62	1.61	1	0.95	0	260.95	0.5	1.62	1.005
28.9592	1737.55	1.98	0.61	0.02	7688.7	6941.8	21417.8	4.4	-39.14	2.697	3.119	11.43	83.22	0.8886	0.8809	0.9858	0.8907	7.1	4.463	7190.8	746.9	22.5854	2.59	2.57	0.59	1.27	1.25	1.6	1.58	0.99	0.93	0	257.01	0.5	1.6	0.99
28.9925	1739.55	1.99	0.62	0.02	7688.4	6942.3	21418.5	4.5	-39.14	2.697	3.119	11.42	83.71	0.8886	0.8808	0.9859	0.8906	6.9	4.497	7191	746.1	22.5853	2.61	2.59	0.6	1.28	1.26	1.61	1.59	1	0.94	0	259	0.5	1.615	0.995
29.0258	1741.55	1.98	0.62	0.02	7688.4	6942.8	21419.5	4.4	-39.14	2.697	3.119	11.4	84.16	0.8886	0.8808	0.9859	0.8906	7.1	4.463	7191.3	745.6	22.5853	2.59	2.57	0.59	1.27	1.25	1.6	1.58	0.99	0.93	0	257.04	0.5	1.605	0.99
29.0592	1743.55	1.99	0.61	0.03	7689.1	6942.8	21420.1	4.5	-39.14	2.697	3.12	11.39	84.74	0.8886	0.8809	0.9859	0.8907	7	4.497	7191.6	746.2	22.5853	2.6	2.58	0.59	1.27	1.25	1.61	1.58	1	0.94	0	258.97	0.5	1.605	0.995
29.0925	1745.55	1.98	0.61	0.03	7688.7	6943.3	21420.7	4.4	-39.14	2.697	3.121	11.38	85.3	0.8886	0.8808	0.986	0.8907	6.8	4.463	7191.8	745.4	22.5853	2.59	2.56	0.59	1.27	1.24	1.6	1.57	0.99	0.93	0	257.02	0.5	1.6	0.99
29.1258	1747.55	1.96	0.61	0.03	7689	6942.8	21420.1	4.4	-39.15	2.697	3.12	11.36	85.97	0.8887	0.8808	0.9859	0.8907	6.8	4.429	7191.6	746.2	22.5853	2.57	2.53	0.57	1.26	1.23	1.59	1.55	0.98	0.92	0	255.03	0.5	1.59	0.98
29.1592	1749.55	1.95	0.6	0.03	7689	6943.3	21421	4.4	-39.16	2.697	3.121	11.35	86.29	0.8887	0.8808	0.986	0.8907	6.8	4.394	7191.9	745.7	22.5853	2.54	2.52	0.57	1.25	1.22	1.57	1.54	0.97	0.92	0	253.04	0.5	1.57	0.975
29.1925	1751.55	1.96	0.6	0.03	7688.3	6944.8	21423.4	4.4	-39.15	2.697	3.12	11.33	86.47	0.8887	0.8806	0.9862	0.8906	7	4.429	7192.7	743.5	22.5852	2.56	2.54	0.58	1.26	1.23	1.58	1.56	0.98	0.92	0	255.04	0.5	1.58	0.98
29.2258	1753.55	1.98	0.6	0.04	7688.7	6945.9	21425.7	4.4	-39.15	2.697	3.12	11.31	87.01	0.8888	0.8806	0.9864	0.8907	7	4.463	7193.5	742.8	22.5852	2.58	2.54	0.56	1.26	1.22	1.59	1.55	0.99	0.93	0	256.99	0.5	1.59	0.99
29.2592	1755.55	1.98	0.6	0.04	7688.7	6945.3	21424.7	4.4	-39.14	2.697	3.12	11.29	87.66	0.8888	0.8806	0.9863	0.8907	7	4.462	7193.1	743.3	22.5852	2.57	2.54	0.56	1.26	1.22	1.58	1.55	0.99	0.93	0	256.97	0.5	1.585	0.99
29.2925	1757.55	1.95	0.59	0.03	7688.6	6945.3	21424.7	4.4	-39.15	2.697	3.121	11.27	88.23	0.8889	0.8806	0.9863	0.8907	6.6	4.394	7193.1	743.3	22.5852	2.54	2.5	0.56	1.24	1.21	1.57	1.53	0.97	0.92	0	253.04	0.5	1.565	0.975
29.3258	1759.55	1.96	0.59	0.05	7688.9	6945.3	21425	4.4	-39.16	2.697	3.121	11.25	88.92	0.8889	0.8806	0.9863	0.8907	6.7	4.428	7193.2	743.6	22.5852	2.55	2.5	0.54	1.24	1.2	1.57	1.52	0.98	0.92	0	254.97	0.5	1.57	0.98
29.3592	1761.55	1.96	0.58	0.05	7688.9	6944.3	21423	4.4	-39.16	2.697	3.121	11.23	89.56	0.8889	0.8806	0.9862	0.8907	6.7	4.427	7192.5	744.6	22.5852	2.54	2.5	0.54	1.24	1.19	1.56	1.52	0.98	0.92	0	254.96	0.5	1.56	0.98
29.3925	1763.55	1.98	0.58	0.04	7688.9	6944.3	21423	4.4	-39.17	2.698	3.122	11.22	90	0.8889	0.8806	0.9862	0.8907	6.7	4.462	7192.5	744.6	22.5852	2.56	2.52	0.55	1.24	1.2	1.57	1.53	0.99	0.93	0	256.92	0.5	1.57	0.99
29.4258	1765.55	1.96	0.58	0.04	7688.6	6944.8	21423.6	4.4	-39.16	2.697	3.122	11.19	90.48	0.8889	0.8805	0.9862	0.8906	6.6	4.427	7192.8	743.8	22.5852	2.54	2.5	0.54	1.23	1.19	1.56	1.52	0.98	0.92	0	254.95	0.5	1.56	0.98
29.4592	1767.55	1.95	0.58	0.05	7689.2	6944.3	21423.3	4.4	-39.16	2.697	3.121	11.17	91.2	0.8891	0.8805	0.9862	0.8907	6.7	4.393	7192.6	744.9	22.5852	2.52	2.48	0.53	1.23	1.18	1.55	1.51	0.97	0.92	0	252.97	0.5	1.55	0.975
29.4925	1769.55	1.91	0.58	0.05	7688.2	6944.3	21422.3	4.3	-39.15	2.697	3.121	11.15	91.39	0.889	0.8803	0.9862	0.8906	6.7	4.325	7192.3	743.9	22.5852	2.49	2.45	0.53	1.22	1.17	1.54	1.49	0.96	0.9	0	249.08	0.5	1.535	0.955
29.5258	1771.55	1.91	0.58	0.04	7688.9	6945.9	21425.9	4.3	-39.15	2.697	3.122	11.12	91.35	0.8891	0.8804	0.9864	0.8907	6.6	4.325	7193.5	743	22.5852	2.49	2.46	0.54	1.22	1.18	1.54	1.5	0.96	0.9	0	249.06	0.5	1.535	0.955
29.5592	1773.55	1.95	0.57	0.03	7688.5	6946.9	21427.5	4.4	-39.15	2.697	3.121	11.1	91.31	0.8891	0.8803	0.9865	0.8906	6.7	4.393	7194.1	741.7	22.5851	2.52	2.49	0.54	1.22	1.19	1.55	1.52	0.97	0.92	0	252.98	0.5	1.545	0.975
29.5925	1775.55	1.93	0.57	0.03	7688.2	6946.4	21426.3	4.3	-39.16	2.698	3.121	11.08	91.9	0.8891	0.8802	0.9864	0.8906	6.9	4.359	7193.6	741.8	22.5851	2.5	2.47	0.54	1.21	1.18	1.53	1.5	0.96	0.91	0	251.01	0.5	1.535	0.965
29.6258	1777.55	1.96	0.57	0.04	7688.9	6943.8	21421.9	4.4	-39.15	2.697	3.121	11.05	92.67	0.8892	0.8803	0.9861	0.8907	6.7	4.427	7192.2	745	22.5853	2.53	2.49	0.53	1.22	1.19	1.55	1.51	0.98	0.92	0	254.91	0.5	1.55	0.98
29.6592	1779.55	1.91	0.56	0.05	7688.2	6940.8	21415.2	4.3	-39.17	2.697	3.122	11.03	93.48	0.8892	0.8801	0.9857	0.8906	6.4	4.324	7189.9	747.4	22.5854	2.47	2.42	0.51	1.19	1.15	1.51	1.47	0.96	0.9	0	249	0.5	1.515	0.955
29.6925	1781.55	1.93	0.56	0.05	7688.8	6937.8	21409.9	4.3	-39.17	2.697	3.122	11.02	94.28	0.8892	0.8802	0.9852	0.8907	6.6	4.358	7188.1	751.1	22.5855	2.48	2.43	0.51	1.2	1.15	1.52	1.47	0.96	0.91	0	250.94	0.5	1.52	0.965
29.7258	1783.55	1.93	0.56	0.05	7688.8	6936.7	21407.9	4.3	-39.16	2.697	3.123	10.99	94.9	0.8893	0.8802	0.9851	0.8907	6.3	4.358	7187.4	752.1	22.5856	2.48	2.43	0.5	1.2	1.14	1.52	1.47	0.96	0.91	0	250.94	0.5	1.52	0.965
29.7592	1785.55	1.93	0.56	0.05	7688.8	6936.2	21406.8	4.3	-39.16	2.697	3.122	10.99	95.21	0.8894	0.8801	0.985	0.8907	6.6	4.358	7187.1	752.5	22.5856	2.48	2.43	0.51	1.2	1.15	1.52	1.47	0.96	0.91	0	250.94	0.5	1.52	0.965
29.7925	1787.55	1.91	0.55	0.05	7688.4	6937.3	21408.5	4.3	-39.16	2.697	3.122	10.98	95.49	0.8894	0.88	0.9852	0.8906	6.4	4.323	7187.6	751.2	22.5856	2.46	2.41	0.5	1.19	1.13	1.51	1.45	0.96	0.9	0	248.98	0.5	1.505	0.955
29.8258	1789.55	1.87	0.56	0.05	7689.1	6939.3	21413.2	4.2	-39.16	2.697	3.123	10.97	96	0.8895	0.8801	0.9854	0.8907	6.3	4.222	7189.2	749.8	22.5855	2.43	2.38	0.51	1.18	1.13	1.49	1.44	0.93	0.88	0	243.1	0.5	1.495	0.935
29.8592	1791.55	1.9	0.56	0.05	7688.8	6940.8	21415.8	4.3	-39.15	2.697	3.122	10.96	96.53	0.8895	0.88	0.9857	0.8907	6.4	4.29	7190.1	748	22.5854	2.45	2.4	0.51	1.19	1.14	1.5	1.45	0.95	0.9	0	247.02	0.5	1.505	0.95
29.8925	1793.55	1.88	0.56	0.05	7688.4	6941.8	21417.5	4.2	-39.15	2.697	3.122	10.95	97.08	0.8895	0.8799	0.9858	0.8906	6.4	4.256	7190.7	746.6	22.5854	2.44	2.39	0.5	1.18	1.13	1.5	1.44	0.94	0.89	0	245.07	0.5	1.5	0.94
29.9258	1795.55	1.88	0.55	0.06	7689	6942.8	21420.1	4.2	-39.16	2.697	3.122	10.94	97.6	0.8896	0.8799	0.9859	0.8907	6.4	4.255	7191.6	746.2	22.5853	2.43	2.38	0.49	1.18	1.12	1.49	1.43	0.94	0.89	0	245.04	0.5	1.49	0.94
29.9592	1797.55	1.87	0.56	0.06	7688.7	6944.8	21423.7	4.2	-39.16	2.696	3.122	10.93	98.1	0.8896	0.8798	0.9862	0.8907	6.3	4.222	7192.8	743.9	22.5852	2.42	2.37	0.5	1.18	1.12	1.49	1.43	0.93	0.88	0	243.1	0.5	1.49	0.935
29.9925	1799.55	1.9	0.55	0.05	7688.4	6947.4	21428.4	4.3	-39.16	2.697	3.122	10.91	98.21	0.8896	0.8798	0.9866	0.8906	6.4	4.289	7194.4	741	22.5851	2.45	2.4	0.5	1.18	1.14	1.5	1.45	0.95	0.9	0	247.02	0.5	1.5	0.95
30.0258	1801.55	1.85	0.56	0.05	7688.4	6948.4	21430.4	4.2	-39.15	2.697	3.123	10.9	98.68	0.8896	0.8798	0.9867	0.8906	6.3	4.187	7195	740	22.5851	2.41	2.36	0.5	1.17	1.12	1.48	1.43	0.93	0.87	0	241.15	0.5	1.485	0.925
30.0592	1803.55	1.87	0.55	0.05	7689	6947.9	21430	4.2	-39.16	2.697	3.123	10.88	99.47	0.8898	0.8798	0.9867	0.8907	6.2	4.221	7194.9	741.1	22.5851	2.42	2.36	0.49	1.17	1.11	1.48	1.43	0.93	0.88	0	243.07	0.5	1.485	0.935
30.0925	1805.55	1.87	0.55	0.05	7688.3	6947.9	21429.3	4.2	-39.15	2.697	3.122	10.86	99.75	0.8897	0.8797	0.9867	0.8906	6.4	4.221	7194.7	740.5	22.5851	2.42	2.36	0.5	1.17	1.12	1.48	1.43	0.93	0.88	0	243.09	0.5	1.485	0.935
30.1258	1807.55	1.87	0.55	0.05	7688.3	6948.4	21430.3	4.2	-39.15	2.697	3.123	10.84	99.73	0.8898	0.8796	0.9867	0.8906	6.4	4.221	7195	739.9	22.5851	2.42	2.36	0.5	1.17	1.12	1.48	1.43	0.93	0.88	0	243.09	0.5	1.485	0.935
30.1592	1809.55	1.87	0.54	0.04	7689	6948.4	21431	4.2	-39.16	2.696	3.123	10.82	99.69	0.8898	0.8797	0.9867	0.8907	6.1	4.22	7195.2	740.6	22.5851	2.41	2.37	0.5	1.16	1.12	1.47	1.43	0.93	0.88	0	243.04	0.5	1.475	0.935
30.1925	1811.55	1.88	0.54	0.03	7688.6	6947.9	21429.6	4.2	-39.15	2.695	3.123	10.79	99.65	0.8898	0.8796	0.9867	0.8906	5.9	4.255	7194.8	740.7	22.5851	2.42	2.4	0.51	1.16	1.14	1.48	1.45	0.94	0.89	0	245.01	0.5	1.48	0.94
30.2258	1813.55	1.88	0.54	0.03	7688.9	6948.4	21430.9	4.2	-39.15	2.696	3.123	10.76	99.62	0.8899	0.8796	0.9867	0.8907	6	4.255	7195.2	740.6	22.5851	2.43	2.4	0.52	1.17	1.14	1.48	1.46	0.94	0.89	0	245.01	0.5	1.485	0.94
30.2592	1815.55	1.85	0.53	0.03	7688.9	6946.4	21427	4.2	-39.15	2.696	3.123	10.73	99.6	0.89	0.8795	0.9864	0.8907	6.1	4.186	7193.9	742.6	22.5851	2.39	2.36	0.51	1.15	1.13	1.46	1.43	0.93	0.87	0	241.06	0.5	1.46	0.925
30.2925	1817.55	1.87	0.53	0.01	7689.3	6944.8	21424.3	4.2	-39.15	2.696	3.123	10.7	99.59	0.89	0.8796	0.9862	0.8907	6	4.22	7193	744.4	22.5852	2.4	2.39	0.52	1.16	1.14	1.47	1.45	0.93	0.88	0	243.01	0.5	1.465	0.935
30.3258	1819.55	1.87	0.53	0.01	7688.2	6943.3	21420.3	4.2	-39.15	2.696	3.123	10.67	99.58	0.8899	0.8794	0.986	0.8906	6	4.22	7191.6	744.9	22.5853	2.4	2.39	0.52	1.16	1.15	1.47	1.46	0.93	0.88	0	243.04	0.5	1.465	0.935
30.3592	1821.55	1.88	0.52	0	7688.9	6940.3	21414.9	4.2	-39.15	2.696	3.123	10.65	99.57	0.89	0.8795	0.9856	0.8907	6	4.254	7189.8	748.6	22.5854	2.41	2.4	0.52	1.15	1.15	1.46	1.46	0.94	0.89	0	244.95	0.5	1.465	0.94
30.3925	1823.55	1.84	0.52	0	7688.6	6938.3	21410.6	4.1	-39.16	2.697	3.124	10.63	99.61	0.89	0.8794	0.9853	0.8906	6	4.151	7188.4	750.3	22.5855	2.36	2.36	0.52	1.13	1.13	1.44	1.44	0.92	0.87	0	239.06	0.5	1.44	0.92
30.4258	1825.55	1.85	0.52	0	7688.5	6935.7	21405.6	4.2	-39.15	2.696	3.124	10.61	100.02	0.89	0.8794	0.9849	0.8906	5.9	4.186	7186.7	752.8	22.5856	2.38	2.37	0.52	1.14	1.14	1.45	1.45	0.93	0.87	0	241.04	0.5	1.45	0.925
30.4592	1827.55	1.85	0.52	0	7688.6	6933.7	21401.7	4.2	-39.15	2.696	3.123	10.6	100.36	0.89	0.8794	0.9847	0.8906	6	4.185	7185.3	754.9	22.5857	2.37	2.37	0.52	1.14	1.14	1.44	1.44	0.93	0.87	0	241.02	0.5	1.445	0.925
30.4925	1829.55	1.85	0.51	0	7688.9	6932.7	21399.9	4.2	-39.15	2.696	3.124	10.6	100.6	0.8901	0.8794	0.9845	0.8907	5.9	4.185	7184.8	756.2	22.5858	2.37	2.36	0.51	1.13	1.13	1.44	1.44	0.93	0.87	0	241	0.5	1.44	0.925
30.5258	1831.55	1.85	0.52	0	7688.8	6932.7	21399.9	4.2	-39.16	2.697	3.124	10.6	100.65	0.8902	0.8793	0.9845	0.8907	6	4.185	7184.7	756.1	22.5858	2.37	2.37	0.52	1.14	1.14	1.44	1.44	0.93	0.87	0	241.01	0.5	1.445	0.925
30.5592	1833.55	1.82	0.52	0	7688.2	6933.2	21400.3	4.1	-39.16	2.696	3.125	10.6	100.88	0.8901	0.8792	0.9846	0.8906	5.8	4.117	7184.9	755	22.5857	2.34	2.34	0.52	1.13	1.13	1.43	1.43	0.91	0.86	0	237.11	0.5	1.43	0.91
30.5925	1835.55	1.82	0.52	0	7688.5	6933.7	21401.6	4.1	-39.15	2.696	3.124	10.6	100.89	0.8902	0.8792	0.9847	0.8906	5.9	4.117	7185.3	754.8	22.5857	2.35	2.35	0.52	1.13	1.13	1.43	1.43	0.91	0.86	0	237.11	0.5	1.435	0.91
30.6258	1837.55	1.84	0.52	0	7689.1	6936.2	21407.2	4.1	-39.16	2.696	3.124	10.61	100.88	0.8903	0.8793	0.985	0.8907	5.9	4.151	7187.2	752.9	22.5856	2.36	2.36	0.52	1.13	1.14	1.44	1.44	0.92	0.87	0	239.04	0.5	1.44	0.92
30.6592	1839.55	1.84	0.52	-0.01	7688.5	6938.3	21410.5	4.1	-39.16	2.697	3.125	10.61	100.98	0.8903	0.8791	0.9853	0.8906	6.1	4.152	7188.3	750.2	22.5855	2.36	2.37	0.53	1.14	1.14	1.44	1.45	0.92	0.87	0	239.08	0.5	1.44	0.92
30.6925	1841.55	1.82	0.52	-0.02	7688.5	6939.8	21413.5	4.1	-39.16	2.697	3.125	10.62	101.12	0.8903	0.8791	0.9855	0.8906	5.9	4.117	7189.3	748.7	22.5854	2.34	2.36	0.53	1.13	1.14	1.43	1.45	0.91	0.86	0	237.1	0.5	1.43	0.91
30.7258	1843.55	1.81	0.52	-0.02	7689.1	6942.3	21419.1	4.1	-39.16	2.697	3.125	10.62	101.23	0.8904	0.8791	0.9859	0.8907	5.9	4.083	7191.2	746.8	22.5853	2.33	2.34	0.53	1.12	1.14	1.42	1.44	0.9	0.85	0	235.12	0.5	1.425	0.905
30.759	1845.54	1.78	0.51	-0.01	7689.1	6942.8	21420.2	4	-39.16	2.697	3.125	10.63	101.77	0.8903	0.8792	0.9859	0.8907	5.9	4.015	7191.6	746.3	22.5853	2.29	2.3	0.53	1.11	1.12	1.4	1.41	0.89	0.84	0	231.18	0.5	1.4	0.89
30.7923	1847.54	1.79	0.52	-0.01	7688.4	6943.8	21421.4	4	-39.16	2.696	3.123	10.63	102.16	0.8904	0.879	0.9861	0.8906	6	4.049	7192	744.6	22.5853	2.31	2.32	0.53	1.12	1.13	1.41	1.43	0.9	0.85	0	233.18	0.5	1.415	0.895
30.8257	1849.54	1.81	0.52	-0.01	7688.4	6945.3	21424.4	4.1	-39.16	2.697	3.125	10.63	102.34	0.8904	0.879	0.9863	0.8906	5.9	4.083	7193	743.1	22.5852	2.33	2.34	0.53	1.13	1.13	1.43	1.44	0.9	0.85	0	235.16	0.5	1.425	0.905
30.859	1851.54	1.84	0.52	-0.01	7689.1	6945.9	21426.1	4.1	-39.16	2.697	3.125	10.63	102.63	0.8905	0.879	0.9864	0.8907	5.9	4.152	7193.6	743.2	22.5852	2.36	2.37	0.53	1.14	1.14	1.44	1.45	0.92	0.87	0	239.06	0.5	1.44	0.92
30.8923	1853.54	1.81	0.52	0	7688.7	6945.9	21425.8	4.1	-39.16	2.697	3.124	10.62	103.08	0.8905	0.879	0.9864	0.8907	6.2	4.083	7193.5	742.9	22.5852	2.33	2.33	0.52	1.12	1.13	1.42	1.43	0.9	0.85	0	235.14	0.5	1.425	0.905
30.9257	1855.54	1.81	0.53	0	7689	6946.4	21427.1	4.1	-39.15	2.697	3.123	10.62	103.22	0.8906	0.879	0.9864	0.8907	6.3	4.084	7193.9	742.7	22.5851	2.34	2.34	0.53	1.13	1.13	1.43	1.44	0.9	0.85	0	235.16	0.5	1.435	0.905
30.959	1857.54	1.81	0.52	-0.01	7688.7	6947.4	21428.7	4.1	-39.16	2.697	3.125	10.61	103.22	0.8906	0.8789	0.9866	0.8907	5.9	4.083	7194.5	741.3	22.5851	2.33	2.34	0.53	1.12	1.13	1.42	1.43	0.9	0.85	0	235.14	0.5	1.425	0.905
30.9923	1859.54	1.82	0.52	-0.01	7688.4	6947.9	21429.4	4.1	-39.16	2.697	3.124	10.61	103.47	0.8905	0.8789	0.9867	0.8906	6.2	4.117	7194.7	740.5	22.5851	2.35	2.36	0.54	1.13	1.14	1.43	1.45	0.91	0.86	0	237.12	0.5	1.435	0.91
31.0257	1861.54	1.81	0.52	0	7689	6947.4	21429	4.1	-39.16	2.697	3.125	10.61	103.9	0.8906	0.8789	0.9866	0.8907	5.9	4.083	7194.6	741.6	22.5851	2.33	2.33	0.52	1.12	1.13	1.42	1.43	0.9	0.85	0	235.13	0.5	1.425	0.905
31.059	1863.54	1.81	0.52	0	7688.7	6946.9	21427.7	4.1	-39.16	2.697	3.124	10.6	104.38	0.8906	0.8789	0.9865	0.8907	6	4.083	7194.1	741.8	22.5851	2.33	2.33	0.52	1.12	1.13	1.42	1.43	0.9	0.85	0	235.14	0.5	1.425	0.905
31.0923	1865.54	1.81	0.51	0	7689	6946.4	21427	4.1	-39.17	2.697	3.124	10.59	104.9	0.8907	0.8788	0.9864	0.8907	6	4.083	7193.9	742.6	22.5851	2.32	2.33	0.52	1.12	1.12	1.42	1.42	0.9	0.85	0	235.11	0.5	1.415	0.905
31.1257	1867.54	1.79	0.51	0	7689	6946.4	21427	4	-39.17	2.697	3.123	10.59	105.22	0.8908	0.8787	0.9864	0.8907	6.2	4.049	7193.9	742.6	22.5851	2.31	2.31	0.51	1.11	1.11	1.41	1.41	0.9	0.85	0	233.15	0.5	1.41	0.895
31.159	1869.54	1.78	0.51	0	7688.3	6945.3	21424.3	4	-39.16	2.696	3.124	10.57	105.74	0.8908	0.8786	0.9863	0.8906	5.9	4.015	7193	742.9	22.5852	2.29	2.29	0.51	1.11	1.11	1.4	1.4	0.89	0.84	0	231.21	0.5	1.4	0.89
31.1923	1871.54	1.78	0.51	0	7688.6	6943.3	21420.6	4	-39.16	2.697	3.123	10.57	106.03	0.8909	0.8786	0.986	0.8906	6.3	4.015	7191.7	745.3	22.5853	2.29	2.29	0.51	1.11	1.11	1.4	1.4	0.89	0.84	0	231.2	0.5	1.4	0.89
31.2257	1873.54	1.81	0.52	0	7688.9	6942.8	21420	4.1	-39.17	2.697	3.125	10.56	106.27	0.8909	0.8786	0.9859	0.8907	6.1	4.083	7191.5	746.1	22.5853	2.33	2.33	0.52	1.12	1.12	1.42	1.42	0.9	0.85	0	235.13	0.5	1.425	0.905
31.259	1875.54	1.79	0.51	0	7688.6	6942.8	21419.6	4	-39.17	2.698	3.126	10.56	106.32	0.8909	0.8786	0.9859	0.8906	6.1	4.049	7191.4	745.8	22.5853	2.3	2.3	0.51	1.11	1.11	1.41	1.41	0.9	0.85	0	233.15	0.5	1.405	0.895
31.2923	1877.54	1.78	0.51	0	7688.9	6942.3	21419	4	-39.16	2.698	3.126	10.55	106.69	0.8909	0.8786	0.9859	0.8907	6.1	4.015	7191.2	746.6	22.5853	2.29	2.29	0.51	1.1	1.11	1.4	1.4	0.89	0.84	0	231.18	0.5	1.4	0.89
31.3257	1879.54	1.79	0.51	0	7688.2	6941.8	21417.3	4	-39.17	2.698	3.126	10.55	107.11	0.8909	0.8785	0.9858	0.8906	6	4.049	7190.6	746.4	22.5854	2.31	2.3	0.51	1.11	1.11	1.41	1.41	0.9	0.85	0	233.17	0.5	1.41	0.895
31.359	1881.54	1.78	0.5	0	7688.6	6940.8	21415.6	4	-39.16	2.697	3.126	10.55	107.57	0.8909	0.8785	0.9857	0.8906	5.9	4.014	7190	747.8	22.5854	2.28	2.28	0.5	1.1	1.09	1.39	1.39	0.89	0.84	0	231.17	0.5	1.39	0.89
31.3923	1883.54	1.76	0.51	0	7688.6	6940.3	21414.6	4	-39.17	2.697	3.125	10.54	107.82	0.8909	0.8785	0.9856	0.8906	6.1	3.98	7189.7	748.3	22.5854	2.27	2.27	0.5	1.1	1.09	1.39	1.39	0.88	0.83	0	229.22	0.5	1.39	0.88
31.4257	1885.54	1.78	0.51	0	7688.9	6940.8	21415.9	4	-39.16	2.697	3.126	10.54	108.06	0.891	0.8785	0.9857	0.8907	5.9	4.015	7190.2	748.1	22.5854	2.29	2.29	0.51	1.1	1.1	1.4	1.4	0.89	0.84	0	231.18	0.5	1.4	0.89
31.459	1887.54	1.78	0.5	0	7689.2	6940.8	21416.2	4	-39.17	2.698	3.127	10.55	108.25	0.8911	0.8785	0.9857	0.8907	5.8	4.014	7190.3	748.4	22.5854	2.28	2.29	0.51	1.1	1.1	1.39	1.4	0.89	0.84	0	231.15	0.5	1.39	0.89
31.4923	1889.54	1.79	0.5	0	7688.5	6941.8	21417.6	4	-39.17	2.698	3.126	10.55	108.61	0.891	0.8784	0.9858	0.8906	6.1	4.048	7190.7	746.7	22.5854	2.3	2.29	0.5	1.1	1.1	1.4	1.4	0.9	0.84	0	233.13	0.5	1.4	0.895
31.5257	1891.54	1.78	0.51	0	7688.5	6941.8	21417.6	4	-39.17	2.698	3.126	10.54	109	0.8911	0.8783	0.9858	0.8906	6	4.015	7190.7	746.7	22.5854	2.29	2.29	0.51	1.11	1.1	1.4	1.4	0.89	0.84	0	231.2	0.5	1.4	0.89
31.559	1893.54	1.76	0.51	0	7689.2	6942.3	21419.2	4	-39.16	2.698	3.127	10.54	109.37	0.8911	0.8784	0.9859	0.8907	5.8	3.98	7191.3	746.8	22.5853	2.27	2.27	0.5	1.1	1.09	1.39	1.39	0.88	0.83	0	229.21	0.5	1.39	0.88
31.5923	1895.54	1.78	0.51	0.01	7688.5	6942.8	21419.6	4	-39.16	2.697	3.126	10.54	109.75	0.8911	0.8783	0.9859	0.8906	5.9	4.015	7191.4	745.7	22.5853	2.29	2.28	0.5	1.1	1.09	1.4	1.39	0.89	0.84	0	231.19	0.5	1.4	0.89
31.6257	1897.54	1.78	0.51	0.01	7688.8	6942.8	21419.9	4	-39.17	2.697	3.126	10.55	110.06	0.8911	0.8783	0.9859	0.8907	5.8	4.015	7191.5	746	22.5853	2.29	2.28	0.51	1.11	1.1	1.4	1.39	0.89	0.84	0	231.19	0.5	1.4	0.89
31.659	1899.54	1.76	0.51	0	7689.1	6943.3	21421.1	4	-39.16	2.698	3.126	10.55	110.34	0.8912	0.8783	0.986	0.8907	6	3.98	7191.9	745.8	22.5853	2.27	2.27	0.5	1.1	1.09	1.39	1.39	0.88	0.83	0	229.21	0.5	1.39	0.88
31.6923	1901.54	1.78	0.5	0	7688.8	6944.3	21422.8	4	-39.17	2.699	3.126	10.54	110.58	0.8912	0.8782	0.9862	0.8907	6.1	4.014	7192.5	744.5	22.5852	2.28	2.28	0.5	1.1	1.09	1.39	1.39	0.89	0.84	0	231.16	0.5	1.39	0.89
31.7257	1903.54	1.75	0.51	0	7689.1	6944.8	21424.2	3.9	-39.17	2.699	3.127	10.54	110.83	0.8912	0.8783	0.9862	0.8907	6	3.946	7192.9	744.3	22.5852	2.26	2.25	0.5	1.09	1.09	1.38	1.38	0.87	0.82	0	227.25	0.5	1.385	0.875
31.759	1905.54	1.76	0.5	0	7688.8	6945.9	21425.8	4	-39.17	2.698	3.127	10.54	111.08	0.8913	0.8782	0.9864	0.8907	5.8	3.98	7193.5	742.9	22.5852	2.27	2.26	0.5	1.09	1.09	1.39	1.38	0.88	0.83	0	229.2	0.5	1.385	0.88
31.7923	1907.54	1.76	0.51	0	7688.8	6945.3	21424.8	4	-39.16	2.698	3.126	10.53	111.29	0.8913	0.8782	0.9863	0.8907	6	3.98	7193.2	743.4	22.5852	2.27	2.27	0.5	1.1	1.09	1.39	1.39	0.88	0.83	0	229.22	0.5	1.39	0.88
31.8257	1909.54	1.78	0.51	0.01	7688.8	6946.4	21426.8	4	-39.16	2.698	3.126	10.53	111.56	0.8913	0.8782	0.9864	0.8907	6	4.015	7193.8	742.4	22.5851	2.29	2.28	0.5	1.11	1.09	1.4	1.39	0.89	0.84	0	231.2	0.5	1.4	0.89
31.859	1911.54	1.78	0.5	0	7688.7	6946.9	21427.7	4	-39.17	2.698	3.128	10.53	111.78	0.8914	0.8781	0.9865	0.8907	5.7	4.014	7194.2	741.9	22.5851	2.28	2.28	0.5	1.1	1.09	1.39	1.39	0.89	0.84	0	231.17	0.5	1.39	0.89
31.8923	1913.54	1.75	0.5	0	7688.4	6946.9	21427.4	3.9	-39.17	2.699	3.127	10.52	111.84	0.8914	0.878	0.9865	0.8906	6	3.946	7194	741.5	22.5851	2.25	2.25	0.5	1.09	1.09	1.38	1.38	0.87	0.82	0	227.25	0.5	1.375	0.875
31.9257	1915.54	1.75	0.51	0	7688.7	6947.9	21429.7	3.9	-39.17	2.698	3.127	10.5	112.21	0.8914	0.8781	0.9867	0.8907	5.8	3.946	7194.8	740.9	22.5851	2.26	2.25	0.5	1.09	1.09	1.38	1.38	0.87	0.82	0	227.26	0.5	1.385	0.875
31.959	1917.54	1.73	0.5	0	7688.4	6946.4	21426.4	3.9	-39.16	2.698	3.127	10.5	112.45	0.8914	0.878	0.9864	0.8906	5.8	3.912	7193.7	742	22.5851	2.24	2.24	0.5	1.08	1.08	1.37	1.37	0.87	0.82	0	225.29	0.5	1.37	0.865
31.9923	1919.54	1.75	0.5	0	7688.7	6945.9	21425.7	3.9	-39.17	2.699	3.127	10.49	112.76	0.8914	0.878	0.9864	0.8907	6	3.946	7193.5	742.9	22.5852	2.25	2.25	0.5	1.08	1.08	1.37	1.37	0.87	0.82	0	227.23	0.5	1.375	0.875
32.0257	1921.54	1.79	0.5	0	7688.4	6944.8	21423.4	4	-39.17	2.699	3.127	10.48	113	0.8914	0.8779	0.9862	0.8906	6	4.048	7192.7	743.5	22.5852	2.3	2.29	0.5	1.1	1.1	1.4	1.4	0.9	0.84	0	233.14	0.5	1.4	0.895
32.059	1923.54	1.75	0.5	0	7689.3	6943.8	21422.3	3.9	-39.17	2.699	3.128	10.46	113.26	0.8916	0.878	0.9861	0.8907	5.8	3.946	7192.3	745.5	22.5853	2.24	2.24	0.5	1.08	1.08	1.37	1.37	0.87	0.82	0	227.19	0.5	1.37	0.875
32.0923	1925.54	1.75	0.5	0	7688.7	6942.8	21419.7	3.9	-39.17	2.698	3.127	10.46	113.56	0.8915	0.8779	0.9859	0.8907	5.8	3.946	7191.4	745.9	22.5853	2.25	2.25	0.5	1.08	1.08	1.37	1.37	0.87	0.82	0	227.23	0.5	1.375	0.875
32.1257	1927.54	1.76	0.5	0.01	7689	6941.3	21417.1	4	-39.16	2.698	3.126	10.44	113.86	0.8915	0.878	0.9857	0.8907	6	3.98	7190.5	747.7	22.5854	2.26	2.25	0.49	1.09	1.08	1.38	1.37	0.88	0.83	0	229.18	0.5	1.38	0.88
32.159	1929.54	1.75	0.5	0	7689	6940.8	21416.1	3.9	-39.16	2.698	3.127	10.44	114.2	0.8915	0.878	0.9857	0.8907	5.8	3.946	7190.2	748.2	22.5854	2.24	2.24	0.49	1.08	1.07	1.37	1.36	0.87	0.82	0	227.2	0.5	1.37	0.875
32.1923	1931.54	1.75	0.5	0	7688.7	6939.8	21413.7	3.9	-39.16	2.698	3.127	10.43	114.6	0.8915	0.8779	0.9855	0.8907	5.8	3.946	7189.4	748.9	22.5854	2.24	2.24	0.49	1.08	1.07	1.37	1.36	0.87	0.82	0	227.21	0.5	1.37	0.875
32.2257	1933.54	1.75	0.5	0.01	7689	6939.3	21413	3.9	-39.16	2.697	3.126	10.42	115.01	0.8917	0.8778	0.9854	0.8907	5.8	3.946	7189.2	749.7	22.5855	2.25	2.24	0.5	1.09	1.08	1.38	1.37	0.87	0.82	0	227.23	0.5	1.375	0.875
32.259	1935.54	1.73	0.5	0.01	7689	6938.8	21412	3.9	-39.16	2.697	3.126	10.42	115.33	0.8917	0.8778	0.9854	0.8907	5.8	3.912	7188.8	750.2	22.5855	2.23	2.22	0.49	1.07	1.06	1.36	1.35	0.87	0.82	0	225.24	0.5	1.365	0.865
32.2923	1937.54	1.73	0.5	0.01	7688.3	6938.8	21411.4	3.9	-39.16	2.698	3.127	10.42	115.62	0.8917	0.8777	0.9854	0.8906	5.8	3.912	7188.6	749.5	22.5855	2.23	2.21	0.48	1.07	1.06	1.36	1.35	0.87	0.82	0	225.26	0.5	1.365	0.865
32.3257	1939.54	1.73	0.5	0.01	7688.9	6939.8	21414	3.9	-39.17	2.698	3.128	10.43	115.83	0.8917	0.8778	0.9855	0.8907	5.6	3.912	7189.5	749.2	22.5854	2.23	2.21	0.48	1.07	1.06	1.36	1.35	0.87	0.82	0	225.24	0.5	1.365	0.865
32.359	1941.54	1.73	0.5	0.01	7688.9	6940.3	21415	3.9	-39.16	2.698	3.128	10.43	116.06	0.8917	0.8778	0.9856	0.8907	5.7	3.912	7189.8	748.7	22.5854	2.23	2.22	0.49	1.07	1.06	1.36	1.35	0.87	0.82	0	225.24	0.5	1.365	0.865
32.3923	1943.54	1.75	0.5	0.01	7688.6	6941.3	21416.7	3.9	-39.16	2.698	3.128	10.43	116.3	0.8917	0.8778	0.9857	0.8907	5.7	3.946	7190.4	747.3	22.5854	2.24	2.23	0.49	1.08	1.07	1.37	1.36	0.87	0.82	0	227.21	0.5	1.37	0.875
32.4257	1945.54	1.76	0.5	0	7688.6	6941.8	21417.7	4	-39.16	2.699	3.128	10.43	116.42	0.8917	0.8778	0.9858	0.8907	5.8	3.98	7190.7	746.8	22.5854	2.26	2.26	0.5	1.09	1.08	1.38	1.38	0.88	0.83	0	229.19	0.5	1.38	0.88
32.459	1947.54	1.72	0.5	0.01	7688.9	6943.3	21420.9	3.8	-39.16	2.698	3.128	10.43	116.64	0.8918	0.8777	0.986	0.8907	5.6	3.878	7191.9	745.6	22.5853	2.22	2.21	0.49	1.07	1.06	1.36	1.35	0.86	0.81	0	223.3	0.5	1.36	0.86
32.4923	1949.54	1.73	0.5	0	7688.9	6944.8	21423.9	3.9	-39.16	2.698	3.128	10.43	116.66	0.8918	0.8777	0.9862	0.8907	5.7	3.912	7192.9	744.1	22.5852	2.23	2.23	0.5	1.08	1.07	1.37	1.36	0.87	0.82	0	225.26	0.5	1.365	0.865
32.5257	1951.54	1.72	0.5	0	7688.6	6945.9	21425.6	3.8	-39.16	2.697	3.128	10.43	116.82	0.8918	0.8776	0.9864	0.8906	5.5	3.878	7193.4	742.7	22.5852	2.22	2.22	0.5	1.07	1.07	1.36	1.36	0.86	0.81	0	223.31	0.5	1.36	0.86
32.559	1953.54	1.73	0.5	0	7688.9	6946.4	21427	3.9	-39.16	2.698	3.128	10.42	117.14	0.8918	0.8777	0.9864	0.8907	5.7	3.912	7193.9	742.6	22.5851	2.23	2.23	0.5	1.07	1.07	1.36	1.36	0.87	0.82	0	225.25	0.5	1.365	0.865
32.5923	1955.54	1.7	0.5	0	7688.2	6946.4	21426.3	3.8	-39.16	2.698	3.127	10.42	117.39	0.8918	0.8775	0.9864	0.8906	5.8	3.844	7193.6	741.9	22.5851	2.21	2.21	0.5	1.07	1.07	1.36	1.36	0.85	0.8	0	221.37	0.5	1.355	0.85
32.6257	1957.54	1.73	0.5	0	7689.2	6946.9	21428.2	3.9	-39.16	2.698	3.127	10.41	117.67	0.892	0.8776	0.9865	0.8907	5.8	3.912	7194.3	742.3	22.5851	2.23	2.23	0.5	1.08	1.08	1.37	1.37	0.87	0.82	0	225.25	0.5	1.365	0.865
32.659	1959.54	1.73	0.5	0	7688.9	6946.9	21427.8	3.9	-39.16	2.698	3.128	10.41	118	0.892	0.8775	0.9865	0.8907	5.6	3.912	7194.2	742	22.5851	2.23	2.22	0.49	1.07	1.07	1.36	1.36	0.87	0.82	0	225.25	0.5	1.365	0.865
32.6923	1961.54	1.7	0.5	0	7688.2	6946.4	21426.2	3.8	-39.16	2.698	3.128	10.4	118.23	0.8919	0.8774	0.9864	0.8906	5.7	3.843	7193.6	741.8	22.5851	2.2	2.19	0.49	1.06	1.06	1.35	1.34	0.85	0.8	0	221.34	0.5	1.35	0.85
32.7257	1963.54	1.73	0.5	0	7688.5	6945.9	21425.6	3.9	-39.16	2.699	3.128	10.39	118.59	0.892	0.8774	0.9864	0.8906	5.8	3.912	7193.4	742.7	22.5852	2.23	2.23	0.5	1.08	1.07	1.37	1.36	0.87	0.82	0	225.27	0.5	1.365	0.865
32.759	1965.54	1.73	0.49	0	7688.9	6945.3	21424.9	3.9	-39.16	2.699	3.128	10.39	118.93	0.892	0.8775	0.9863	0.8907	5.8	3.911	7193.2	743.5	22.5852	2.22	2.22	0.49	1.06	1.06	1.35	1.35	0.87	0.82	0	225.22	0.5	1.355	0.865
32.7923	1967.54	1.7	0.5	0	7688.5	6943.3	21420.5	3.8	-39.16	2.698	3.127	10.38	119.29	0.892	0.8774	0.986	0.8906	5.8	3.843	7191.7	745.2	22.5853	2.2	2.19	0.49	1.06	1.06	1.35	1.34	0.85	0.8	0	221.33	0.5	1.35	0.85
32.8257	1969.54	1.72	0.5	0.01	7688.8	6942.8	21419.9	3.8	-39.16	2.698	3.128	10.36	119.66	0.892	0.8774	0.9859	0.8907	5.6	3.877	7191.5	746	22.5853	2.21	2.2	0.48	1.07	1.05	1.35	1.34	0.86	0.81	0	223.29	0.5	1.355	0.86
32.859	1971.54	1.72	0.5	0.01	7688.5	6941.8	21417.5	3.8	-39.16	2.698	3.128	10.36	119.89	0.892	0.8774	0.9858	0.8906	5.7	3.877	7190.7	746.7	22.5854	2.21	2.2	0.49	1.07	1.06	1.35	1.35	0.86	0.81	0	223.29	0.5	1.355	0.86
32.8923	1973.54	1.7	0.5	0.01	7688.8	6941.3	21416.9	3.8	-39.16	2.699	3.128	10.35	119.98	0.892	0.8774	0.9857	0.8907	5.8	3.843	7190.5	747.5	22.5854	2.2	2.19	0.49	1.06	1.05	1.35	1.34	0.85	0.8	0	221.32	0.5	1.35	0.85
32.9257	1975.54	1.72	0.5	0.01	7688.8	6941.8	21417.9	3.8	-39.16	2.698	3.128	10.34	120.1	0.8921	0.8774	0.9858	0.8907	5.6	3.877	7190.8	747	22.5854	2.21	2.2	0.49	1.07	1.06	1.35	1.35	0.86	0.81	0	223.29	0.5	1.355	0.86
32.9588	1977.53	1.7	0.49	0	7688.8	6940.3	21414.8	3.8	-39.16	2.698	3.128	10.34	120.44	0.8921	0.8774	0.9856	0.8907	5.6	3.843	7189.8	748.5	22.5854	2.19	2.19	0.49	1.06	1.05	1.34	1.34	0.85	0.8	0	221.31	0.5	1.34	0.85
32.9922	1979.53	1.7	0.49	0	7688.5	6939.8	21413.5	3.8	-39.16	2.698	3.127	10.33	120.71	0.8921	0.8773	0.9855	0.8906	5.8	3.843	7189.3	748.7	22.5854	2.19	2.19	0.49	1.06	1.05	1.34	1.34	0.85	0.8	0	221.32	0.5	1.34	0.85
33.0255	1981.53	1.7	0.5	0	7688.7	6939.8	21413.8	3.8	-39.16	2.697	3.128	10.33	120.73	0.8923	0.8772	0.9855	0.8907	5.5	3.843	7189.4	749	22.5854	2.2	2.19	0.49	1.06	1.06	1.35	1.34	0.85	0.8	0	221.32	0.5	1.35	0.85
33.0588	1983.53	1.73	0.49	0	7688.4	6940.8	21415.5	3.9	-39.16	2.698	3.128	10.33	121.02	0.8922	0.8772	0.9857	0.8906	5.7	3.911	7190	747.6	22.5854	2.22	2.22	0.49	1.07	1.07	1.36	1.36	0.87	0.82	0	225.24	0.5	1.355	0.865
33.0922	1985.53	1.72	0.5	0	7688.7	6939.8	21413.8	3.8	-39.16	2.697	3.128	10.32	121.63	0.8923	0.8772	0.9855	0.8907	5.5	3.877	7189.4	749	22.5854	2.21	2.21	0.49	1.07	1.06	1.35	1.35	0.86	0.81	0	223.29	0.5	1.355	0.86
33.1255	1987.53	1.69	0.49	0.01	7688.4	6939.8	21413.4	3.8	-39.16	2.697	3.128	10.32	122.01	0.8923	0.8771	0.9855	0.8906	5.5	3.809	7189.3	748.6	22.5854	2.18	2.17	0.48	1.05	1.04	1.33	1.33	0.84	0.8	0	219.36	0.5	1.335	0.845
33.1588	1989.53	1.72	0.49	0	7689.1	6939.8	21414.1	3.8	-39.17	2.699	3.129	10.33	122.27	0.8923	0.8772	0.9855	0.8907	5.6	3.877	7189.5	749.3	22.5854	2.2	2.2	0.48	1.06	1.05	1.34	1.34	0.86	0.81	0	223.25	0.5	1.345	0.86
33.1922	1991.53	1.7	0.49	0	7688.7	6940.3	21414.8	3.8	-39.17	2.699	3.129	10.33	122.46	0.8923	0.8771	0.9856	0.8907	5.6	3.843	7189.8	748.4	22.5854	2.19	2.19	0.49	1.05	1.05	1.34	1.34	0.85	0.8	0	221.3	0.5	1.34	0.85
33.2255	1993.53	1.67	0.49	0	7688.7	6940.8	21415.8	3.7	-39.17	2.699	3.129	10.33	122.66	0.8923	0.8772	0.9857	0.8907	5.6	3.775	7190.1	748	22.5854	2.16	2.16	0.49	1.05	1.04	1.33	1.32	0.84	0.79	0	217.39	0.5	1.325	0.835
33.2588	1995.53	1.69	0.49	0	7689.1	6941.3	21417.1	3.8	-39.16	2.698	3.129	10.34	123	0.8923	0.8772	0.9857	0.8907	5.4	3.809	7190.6	747.8	22.5854	2.17	2.17	0.48	1.05	1.04	1.33	1.32	0.84	0.79	0	219.32	0.5	1.33	0.845
33.2922	1997.53	1.7	0.49	0.01	7688.7	6941.3	21416.8	3.8	-39.17	2.699	3.128	10.34	123.48	0.8923	0.8771	0.9857	0.8907	5.7	3.843	7190.4	747.4	22.5854	2.19	2.18	0.48	1.06	1.05	1.34	1.33	0.85	0.8	0	221.31	0.5	1.34	0.85
33.3255	1999.53	1.69	0.5	0.01	7688.1	6942.3	21418.1	3.8	-39.17	2.697	3.129	10.34	123.69	0.8923	0.877	0.9859	0.8906	5.3	3.809	7190.9	745.7	22.5853	2.18	2.17	0.49	1.06	1.05	1.34	1.33	0.84	0.8	0	219.38	0.5	1.34	0.845
[truncated: 2,163 more rows]

## Sheet: 1-6 gr
	Phase1				Phase 3 and 4

## Sheet: 2-8
Software:		GCTS C.A.T.S. Advanced	Version:	1.97
Project:		16041 - Are Høien
Sample:		Triax
Test:		Triaxial
Specimen:		2016-08-02
Number:		4
Description:		Follobanen
Container ID:		_
Type:		Rock	Hard
Height of Platen(s):		0	(mm)
Double Membrane Thickness:		0	(mm)
Mass of Initial Moist Apparatus:		0	(gr)
Mass of Final Moist Apparatus:		0	(gr)
Mass of Final Dry Apparatus:		0	(gr)
Starting Date:		2016-08-11
Starting Time:		15:14:51
Controller ID:		2647 RTR-4000
Triaxial Setup
		Stages:	6
		1: Static: Prestress
			Axial Actuator
				Control Feedback:	TI-7: Sd - Deviator Stress
				Mode:	Ramp
					Initial Value: Relative/Current
					Ramp Rate:	4	(MPa)/(Minute(s))
					Final Value:	2	(MPa)
			Cell Pressure
				Control Feedback:	AI-5: Cell Pressure
				Mode:	Ramp
					Initial Value: Relative/Current
					Ramp Rate:	4	(MPa)/(Minute(s))
					Final Value:	2	(MPa)
			Pore Pressure
				Control Feedback:	None - Control Undefined
			Stage End
				Maximum Axial Strain:	40000	(µe)
				Maximum Time for Static Loading Stage:	NS
				Input Limit:	NS
				Peak Reversal:	NS
			Data Acquisition:	Automatic
			Type:	Drained
			Beginning of Stage - Handling Strains:
				Update Specimen Dimensions
				Zero Deformations
		2: Static: Prestress hold
			Axial Actuator
				Control Feedback:	TI-7: Sd - Deviator Stress
				Mode:	Constant
					Constant Value:	Absolute/Change to:	2	(MPa)
			Cell Pressure
				Control Feedback:	AI-5: Cell Pressure
				Mode:	Constant
					Constant Value:	Absolute/Change to:	2	(MPa)
			Pore Pressure
				Control Feedback:	None - Control Undefined
			Stage End
				Maximum Axial Strain:	40000	(µe)
				Maximum Time for Static Loading Stage:	NS
				Input Limit:	NS
				Peak Reversal:	NS
			Data Acquisition:	Automatic
			Type:	Drained
			Beginning of Stage - Handling Strains:	(none)
		3: Static: Constant strain
			Axial Actuator
				Control Feedback:	TI-1: Ea - Axial Strain
				Mode:	Constant
					Constant Value:	Relative/Current
			Cell Pressure
				Control Feedback:	TI-2: Er - Radial Strain
				Mode:	Constant
					Constant Value:	Relative/Current
			Pore Pressure
				Control Feedback:	None - Control Undefined
			Stage End
				Maximum Axial Strain:	40000	(µe)
				Maximum Time for Static Loading Stage:	NS
				Input Limit:
					Input:	AI-5: Cell Pressure
					Check Type:	>=
					Check Value:	10	(MPa)
				Peak Reversal:	NS
			Data Acquisition:	Automatic
			Type:	Drained
			Beginning of Stage - Handling Strains:	(none)
		4: Static: Prestress 2
			Axial Actuator
				Control Feedback:	TI-7: Sd - Deviator Stress
				Mode:	Ramp
					Initial Value: Relative/Current
					Ramp Rate:	4	(MPa)/(Minute(s))
					Final Value:	2	(MPa)
			Cell Pressure
				Control Feedback:	AI-5: Cell Pressure
				Mode:	Ramp
					Initial Value: Relative/Current
					Ramp Rate:	4	(MPa)/(Minute(s))
					Final Value:	2	(MPa)
			Pore Pressure
				Control Feedback:	None - Control Undefined
			Stage End
				Maximum Axial Strain:	40000	(µe)
				Maximum Time for Static Loading Stage:	NS
				Input Limit:	NS
				Peak Reversal:	NS
			Data Acquisition:	Automatic
			Type:	Drained
			Beginning of Stage - Handling Strains:	(none)
		5: Static: Release cell pressurd·_x0015_
			Axial Actuator
				Control Feedback:	TI-7: Sd - Deviator Stress
				Mode:	Constant
					Constant Value:	Absolute/Change to:	2	(MPa)
			Cell Pressure
				Control Feedback:	AI-5: Cell Pressure
				Mode:	Ramp
					Initial Value: Relative/Current
					Ramp Rate:	-4	(MPa)/(Minute(s))
					Final Value:	0.2	(MPa)
			Pore Pressure
				Control Feedback:	None - Control Undefined
			Stage End
				Maximum Axial Strain:	30000	(µe)
				Maximum Time for Static Loading Stage:	NS
				Input Limit:
					Input:	AI-5: Cell Pressure
					Check Type:	<=
					Check Value:	0.3	(MPa)
				Peak Reversal:
				Input:	TI-7: Sd - Deviator Stress
				Reversal Value:	0.5	(MPa)
				Threshold:	1	(MPa)
			Data Acquisition:	Automatic
			Type:	Drained
			Beginning of Stage - Handling Strains:	(none)
		6: Static: _
			Axial Actuator
				Control Feedback:	AI-2: Axial Displacement
				Mode:	Constant
					Constant Value:	Relative/Current
			Cell Pressure
				Control Feedback:	None - Control Undefined
			Pore Pressure
				Control Feedback:	None - Control Undefined
			Stage End
				Maximum Axial Strain:	NS
				Maximum Time for Static Loading Stage:	0.1	(Minute(s))
				Input Limit:	NS
				Peak Reversal:	NS
			Data Acquisition:	Automatic
			Type:	Drained
			Beginning of Stage - Handling Strains:	(none)
		Save Objects - Save @ each Recording:
			Time
			Inputs:	15
				AI-1: Axial Load
				AI-2: Axial Displacement
				AI-5: Cell Pressure
				AI-6: Cell Pressure Disp.
				AI-7: Pore Pressure
				AI-9: Axial Deformation 1
				AI-10: Axial Deformation 2
				AI-11: Circum. Deformation
				UFI-1: Avg. Axial Deform.
				UFI-2: Load (Press.)
				UCI-1: corrected int load
				TI-1: Ea - Axial Strain
				TI-2: Er - Radial Strain
				TI-3: Ev - Volumetric Strain
				TI-7: Sd - Deviator Stress
			Analog Outputs:	0
			Ultrasonics
				P wave:	NS
				S wave:	NS
Test Results:		Completed
Stages:		6
Stage Index:		1
		Type:	Static Loading
		Specimen:
			Height:	112.02	(mm)
			Axial Gauge Length:	112.02	(mm)
			Diameter:	54	(mm)
			Area:	22.902	cm^2
			Volume:	256.551	cm^3
		Stage ended because	User forced
		Max (Peak) Sd - Deviator Stress:	2.38	(MPa)
			Time:	34.8715	(Seconds)
			CP - Cell Pressure:	2.21	(MPa)
			U - Pore Pressure:	0	(MPa)
			Ea - Axial Strain:	9919	(µe)
			Er - Radial Strain:	2337	(µe)
			Ev - Volumetric Strain:	14542	(µe)
			Sa - Axial Stress:	4.58	(MPa)
			Sa' - Axial Effective Stress:	4.58	(MPa)
			Sc' - Cell Effective Pressure:	2.2	(MPa)
		End (Residual) Sd - Deviator Stress:	2.06	(MPa)
			Time:	65.5733	(Seconds)	=>	01:05:00
			CP - Cell Pressure:	2.04	(MPa)
			U - Pore Pressure:	0	(MPa)
			Ea - Axial Strain:	9881	(µe)
			Er - Radial Strain:	2504	(µe)
			Ev - Volumetric Strain:	14834	(µe)
			Sa - Axial Stress:	4.1	(MPa)
			Sa' - Axial Effective Stress:	4.1	(MPa)
			Sc' - Cell Effective Pressure:	2.04	(MPa)
Stage Index:		2
		Type:	Static Loading
		Specimen:
			Height:	112.02	(mm)
			Axial Gauge Length:	112.02	(mm)
			Diameter:	54	(mm)
			Area:	22.902	cm^2
			Volume:	256.551	cm^3
		Stage ended because	User forced
		Max (Peak) Sd - Deviator Stress:	2.12	(MPa)
			Time:	66.6737	(Seconds)	=>	01:06:00
			CP - Cell Pressure:	2.05	(MPa)
			U - Pore Pressure:	0	(MPa)
			Ea - Axial Strain:	9880	(µe)
			Er - Radial Strain:	2508	(µe)
			Ev - Volumetric Strain:	14839	(µe)
			Sa - Axial Stress:	4.17	(MPa)
			Sa' - Axial Effective Stress:	4.17	(MPa)
			Sc' - Cell Effective Pressure:	2.05	(MPa)
		End (Residual) Sd - Deviator Stress:	2.05	(MPa)
			Time:	104.549	(Seconds)	=>	01:44:00
			CP - Cell Pressure:	2.01	(MPa)
			U - Pore Pressure:	0.01	(MPa)
			Ea - Axial Strain:	9839	(µe)
			Er - Radial Strain:	2563	(µe)
			Ev - Volumetric Strain:	14908	(µe)
			Sa - Axial Stress:	4.06	(MPa)
			Sa' - Axial Effective Stress:	4.05	(MPa)
			Sc' - Cell Effective Pressure:	2	(MPa)
Stage Index:		3
		Type:	Static Loading
		Specimen:
			Height:	112.02	(mm)
			Axial Gauge Length:	112.02	(mm)
			Diameter:	54	(mm)
			Area:	22.902	cm^2
			Volume:	256.551	cm^3
		Stage ended because	User forced
		Max (Peak) Sd - Deviator Stress:	2.17	(MPa)
			Time:	204.657	(Seconds)	=>	03:24:00
			CP - Cell Pressure:	1.86	(MPa)
			U - Pore Pressure:	0.01	(MPa)
			Ea - Axial Strain:	9839	(µe)
			Er - Radial Strain:	2560	(µe)
			Ev - Volumetric Strain:	14901	(µe)
			Sa - Axial Stress:	4.03	(MPa)
			Sa' - Axial Effective Stress:	4.02	(MPa)
			Sc' - Cell Effective Pressure:	1.85	(MPa)
		End (Residual) Sd - Deviator Stress:	0.7	(MPa)
			Time:	1753.41	(Seconds)	=>	1 day, 5:13:00
			CP - Cell Pressure:	0.54	(MPa)
			U - Pore Pressure:	0.08	(MPa)
			Ea - Axial Strain:	9838	(µe)
			Er - Radial Strain:	2570	(µe)
			Ev - Volumetric Strain:	14921	(µe)
			Sa - Axial Stress:	1.24	(MPa)
			Sa' - Axial Effective Stress:	1.17	(MPa)
			Sc' - Cell Effective Pressure:	0.47	(MPa)
Stage Index:		4
		Type:	Static Loading
		Specimen:
			Height:	112.02	(mm)
			Axial Gauge Length:	112.02	(mm)
			Diameter:	54	(mm)
			Area:	22.902	cm^2
			Volume:	256.551	cm^3
		Stage ended because	User forced
		Max (Peak) Sd - Deviator Stress:	2.24	(MPa)
			Time:	1788.44	(Seconds)	=>	1 day, 5:48:00
			CP - Cell Pressure:	2.08	(MPa)
			U - Pore Pressure:	0.07	(MPa)
			Ea - Axial Strain:	19544	(µe)
			Er - Radial Strain:	6040	(µe)
			Ev - Volumetric Strain:	31351	(µe)
			Sa - Axial Stress:	4.33	(MPa)
			Sa' - Axial Effective Stress:	4.26	(MPa)
			Sc' - Cell Effective Pressure:	2.02	(MPa)
		End (Residual) Sd - Deviator Stress:	2.02	(MPa)
			Time:	1880.09	(Seconds)	=>	1 day, 7:20:00
			CP - Cell Pressure:	1.99	(MPa)
			U - Pore Pressure:	0.04	(MPa)
			Ea - Axial Strain:	20500	(µe)
			Er - Radial Strain:	6401	(µe)
			Ev - Volumetric Strain:	33000	(µe)
			Sa - Axial Stress:	4.01	(MPa)
			Sa' - Axial Effective Stress:	3.97	(MPa)
			Sc' - Cell Effective Pressure:	1.95	(MPa)
Stage Index:		5
		Type:	Static Loading
		Specimen:
			Height:	112.02	(mm)
			Axial Gauge Length:	112.02	(mm)
			Diameter:	54	(mm)
			Area:	22.902	cm^2
			Volume:	256.551	cm^3
		Stage ended because	Input Limit Duration reached
		Max (Peak) Sd - Deviator Stress:	2.08	(MPa)
			Time:	1882.49	(Seconds)	=>	1 day, 7:22:00
			CP - Cell Pressure:	1.94	(MPa)
			U - Pore Pressure:	0.04	(MPa)
			Ea - Axial Strain:	20507	(µe)
			Er - Radial Strain:	6386	(µe)
			Ev - Volumetric Strain:	32977	(µe)
			Sa - Axial Stress:	4.02	(MPa)
			Sa' - Axial Effective Stress:	3.98	(MPa)
			Sc' - Cell Effective Pressure:	1.9	(MPa)
		End (Residual) Sd - Deviator Stress:	1.65	(MPa)
			Time:	1909.24	(Seconds)	=>	1 day, 7:49:00
			CP - Cell Pressure:	0.3	(MPa)
			U - Pore Pressure:	0.04	(MPa)
			Ea - Axial Strain:	22627	(µe)
			Er - Radial Strain:	-64	(µe)
			Ev - Volumetric Strain:	22503	(µe)
			Sa - Axial Stress:	1.95	(MPa)
			Sa' - Axial Effective Stress:	1.91	(MPa)
			Sc' - Cell Effective Pressure:	0.26	(MPa)
Stage Index:		6
		Type:	Static Loading
		Specimen:
			Height:	112.02	(mm)
			Axial Gauge Length:	112.02	(mm)
			Diameter:	54	(mm)
			Area:	22.902	cm^2
			Volume:	256.551	cm^3
		Stage ended because	Time Duration reached
		Max (Peak) Sd - Deviator Stress:	1.68	(MPa)
			Time:	1909.26	(Seconds)	=>	1 day, 7:49:00
			CP - Cell Pressure:	0.31	(MPa)
			U - Pore Pressure:	0.03	(MPa)
			Ea - Axial Strain:	22639	(µe)
			Er - Radial Strain:	-89	(µe)
			Ev - Volumetric Strain:	22464	(µe)
			Sa - Axial Stress:	1.99	(MPa)
			Sa' - Axial Effective Stress:	1.95	(MPa)
			Sc' - Cell Effective Pressure:	0.27	(MPa)
		End (Residual) Sd - Deviator Stress:	1.33	(MPa)
			Time:	1915.24	(Seconds)	=>	1 day, 7:55:00
			CP - Cell Pressure:	0.15	(MPa)
Prestress 1			U - Pore Pressure:	0.03	(MPa)
35 % Max Sa-Sc stress	0.81655		Ea - Axial Strain:	22828	(µe)
65 % Max Sa-Sc stress	1.51645		Er - Radial Strain:	-1711	(µe)
Prestress 2			Ev - Volumetric Strain:	19482	(µe)
35 % Max Sa-Sc stress	1.20655		Sa - Axial Stress:	1.49	(MPa)																							Phase 1
65 % Max Sa-Sc stress	1.72645		Sa' - Axial Effective Stress:	1.46	(MPa)																							Phase 2
			Sc' - Cell Effective Pressure:	0.13	(MPa)																							Phase 3
Data Points (Rows):		1161																										Phase 4
																											NGI-plot
Time	Time	Sd - Deviator Stress	Cell Pressure	Pore Pressure	Ea - Axial Strain	Er - Radial Strain	Ev - Volumetric Strain	Axial Load	Axial Displacement	Cell Pressure Disp.	Axial Deformation 1	Axial Deformation 2	Circum. Deformation	Avg. Axial Deform.	Load (Press.)	corrected int load	Eoct - Octahedral Strain	Shear Strain	Ac - Corrected Area	Sa - Axial Stress	Sa' - Axial Effective Stress	Sc' - Cell Effective Pressure	p Cambridge Mohr Stress	p' Cambridge Mohr Effective Stress	Sa-Sc		(Sc+Sa)/2	Sd/2
min	sec	MPa	MPa	MPa	micro e	micro e	micro e	kN	mm	mm	mm	mm	mm	mm	kN	kN	micro e	micro e	cm^2	MPa	MPa	MPa	MPa	MPa	Mpa
8.14337e-06	0.000488602	0.208	0.05	0	0	-27.8	-55.6	0.5	-10.88	-30.4	0.055	0	-0.0039	0.0272	-4.4	0.48	-18.5	27.8	22.9035	0.255	0.259	0.05	0.116	0.12	0.205		0.1525	0.104
0.0333308	1.99985	0.223	0.1	0.01	0	17.5	34.9	0.5	-10.87	-29.72	0.0535	0	0.0025	0.0265	-0.5	0.517	11.6	-17.5	22.9014	0.325	0.317	0.093	0.176	0.168	0.225		0.2125	0.1115
0.0666617	3.9997	0.268	0.15	0	0	85.8	171.6	0.6	-10.85	-28.77	0.0547	0	0.0122	0.0271	5.4	0.622	57.2	-85.8	22.8983	0.416	0.416	0.148	0.237	0.237	0.266		0.283	0.134
0.0999925	5.99955	0.312	0.23	0	0	181.9	363.6	0.7	-10.81	-27.54	0.0531	0	0.0258	0.0263	5.8	0.728	121.2	-181.9	22.8939	0.539	0.535	0.223	0.331	0.327	0.309		0.3845	0.156
0.131743	7.9046	0.372	0.32	0	100.6	283	666.5	0.9	-10.74	-26.15	0.0531	0.0113	0.0402	0.0319	6.9	0.87	222.2	-182.4	22.8892	0.696	0.692	0.32	0.448	0.444	0.376		0.508	0.186
0.133323	7.99939	0.357	0.33	0	130	288.6	707.1	0.8	-10.74	-26.08	0.0554	0.0146	0.041	0.0347	6.8	0.836	235.8	-158.6	22.889	0.69	0.686	0.329	0.452	0.448	0.36		0.51	0.1785
0.138421	8.30526	0.357	0.35	0	230.1	308.2	846.2	0.8	-10.73	-25.85	0.0531	0.0258	0.0438	0.0392	6.8	0.837	282.1	-78	22.8881	0.704	0.704	0.347	0.466	0.466	0.354		0.527	0.1785
0.143274	8.59647	0.342	0.37	0	330.4	327.1	984.3	0.8	-10.72	-25.62	0.0525	0.037	0.0465	0.0445	6.9	0.805	328.2	3.2	22.8872	0.717	0.713	0.371	0.489	0.485	0.347		0.5435	0.171
0.148006	8.88034	0.387	0.39	0	430.7	346.1	1122.5	0.9	-10.7	-25.4	0.0541	0.0482	0.0492	0.0509	7	0.908	374.3	84.6	22.8864	0.78	0.785	0.398	0.522	0.527	0.39		0.585	0.1935
0.152387	9.14321	0.387	0.42	0	531.2	365.6	1261.9	0.9	-10.7	-25.19	0.0532	0.0595	0.0519	0.0561	7.2	0.909	420.8	165.5	22.8855	0.804	0.799	0.412	0.546	0.541	0.384		0.612	0.1935
0.156695	9.40168	0.387	0.43	0	631.7	387.7	1406.5	0.9	-10.67	-24.99	0.0526	0.0708	0.0551	0.0614	7.4	0.91	469	244	22.8845	0.817	0.813	0.426	0.559	0.555	0.387		0.6235	0.1935
0.160783	9.64696	0.387	0.45	0	731.8	409.8	1550.5	0.9	-10.66	-24.8	0.0529	0.082	0.0582	0.0672	7.5	0.911	517.1	322	22.8834	0.836	0.832	0.445	0.578	0.574	0.386		0.643	0.1935
0.164895	9.8937	0.387	0.47	0	831.9	432.9	1696.7	0.9	-10.65	-24.61	0.0519	0.0932	0.0615	0.0723	8	0.912	565.9	399	22.8824	0.854	0.854	0.467	0.596	0.596	0.384		0.662	0.1935
0.166654	9.99924	0.432	0.48	0	877.3	443.6	1763.5	1	-10.65	-24.53	0.0519	0.0983	0.063	0.0748	7.8	1.015	588.2	433.6	22.8819	0.913	0.917	0.485	0.625	0.629	0.433		0.6965	0.216
0.170457	10.2274	0.387	0.5	0	977.6	466.2	1908.8	0.9	-10.65	-24.36	0.0553	0.1095	0.0662	0.0822	7.8	0.914	636.7	511.4	22.8809	0.882	0.878	0.491	0.624	0.62	0.382		0.691	0.1935
0.174153	10.4492	0.402	0.52	0	1077.9	490.3	2057.3	0.9	-10.63	-24.19	0.0553	0.1208	0.0696	0.0878	8.2	0.949	686.2	587.6	22.8798	0.92	0.92	0.518	0.652	0.652	0.4		0.72	0.201
0.177965	10.6779	0.402	0.54	0	1178.4	515.4	2207.8	0.9	-10.61	-24.02	0.0529	0.132	0.0732	0.0922	8.4	0.95	736.4	663	22.8786	0.939	0.935	0.533	0.671	0.667	0.399		0.7395	0.201
0.181573	10.8944	0.402	0.56	0	1279.7	540.1	2358.1	0.9	-10.6	-23.85	0.0543	0.1433	0.0767	0.0986	8.3	0.951	786.6	739.6	22.8775	0.957	0.957	0.555	0.689	0.689	0.397		0.7585	0.201
0.185172	11.1103	0.447	0.57	0	1379.7	565.7	2509.3	1	-10.59	-23.7	0.0526	0.1546	0.0803	0.1034	8.5	1.054	837	814	22.8763	1.016	1.016	0.569	0.718	0.718	0.446		0.793	0.2235
0.188568	11.3141	0.417	0.59	0	1480.5	592.4	2663.2	1	-10.58	-23.55	0.0532	0.1658	0.0841	0.1093	8.7	0.987	888.4	888.1	22.8751	1.009	1.009	0.592	0.731	0.731	0.419		0.7995	0.2085
0.191997	11.5198	0.432	0.61	0	1580.8	621.1	2820.6	1	-10.57	-23.4	0.0533	0.1771	0.0882	0.1149	9.1	1.022	941	959.7	22.8738	1.043	1.043	0.611	0.755	0.755	0.433		0.8265	0.216
0.19531	11.7186	0.432	0.62	0	1681.1	650.8	2980.2	1	-10.55	-23.25	0.0537	0.1883	0.0924	0.1207	8.9	1.023	994.3	1030.3	22.8724	1.057	1.057	0.625	0.769	0.769	0.437		0.8385	0.216
0.198665	11.9199	0.447	0.64	0	1781.6	681.6	3141.8	1	-10.54	-23.1	0.0535	0.1996	0.0968	0.1263	9	1.058	1048.2	1100	22.871	1.09	1.086	0.639	0.792	0.788	0.45		0.865	0.2235
0.199985	11.9991	0.462	0.65	0	1824.2	693.9	3209	1.1	-10.53	-23.04	0.0528	0.2043	0.0985	0.1283	9.2	1.093	1070.7	1130.3	22.8704	1.114	1.11	0.648	0.806	0.802	0.464		0.882	0.231
0.203153	12.1892	0.447	0.67	0	1924.8	726.2	3373.8	1	-10.52	-22.9	0.0518	0.2156	0.1031	0.1335	9.5	1.06	1125.7	1198.6	22.869	1.113	1.113	0.666	0.815	0.815	0.443		0.8915	0.2235
0.206362	12.3817	0.462	0.69	0	2024.8	756.9	3535.1	1.1	-10.51	-22.75	0.0545	0.2268	0.1075	0.1404	9.4	1.095	1179.6	1267.9	22.8676	1.151	1.151	0.69	0.843	0.843	0.461		0.9205	0.231
0.209398	12.5639	0.507	0.71	0	2125	786.1	3693.3	1.2	-10.49	-22.63	0.0547	0.238	0.1116	0.1461	9.5	1.198	1232.4	1338.8	22.8662	1.215	1.215	0.708	0.877	0.877	0.505		0.9625	0.2535
0.212477	12.7486	0.462	0.73	0	2225.2	817.9	3856.7	1.1	-10.48	-22.5	0.054	0.2493	0.1162	0.1514	9.7	1.097	1287	1407.3	22.8648	1.188	1.188	0.727	0.881	0.881	0.458		0.959	0.231
0.215538	12.9323	0.492	0.75	0	2325.5	849.2	4019.2	1.1	-10.48	-22.36	0.0528	0.2605	0.1206	0.1564	9.6	1.166	1341.3	1476.4	22.8633	1.237	1.237	0.745	0.909	0.909	0.487		0.9935	0.246
0.218608	13.1165	0.477	0.76	0	2426	880.4	4181.8	1.1	-10.46	-22.24	0.0518	0.2718	0.125	0.1615	9.9	1.133	1395.6	1545.5	22.8619	1.236	1.236	0.759	0.918	0.918	0.476		0.998	0.2385
0.221458	13.2875	0.492	0.78	0	2526.5	910.6	4342.3	1.1	-10.45	-22.12	0.0516	0.283	0.1293	0.1671	9.8	1.168	1449.3	1615.8	22.8605	1.269	1.269	0.777	0.941	0.941	0.489		1.0245	0.246
0.224382	13.4629	0.536	0.79	0	2627.1	939.3	4499.9	1.2	-10.44	-22	0.0533	0.2943	0.1334	0.1735	10.2	1.271	1501.9	1687.8	22.8592	1.328	1.328	0.791	0.97	0.97	0.538		1.059	0.268
0.227282	13.6369	0.492	0.81	0	2727.1	958.3	4637.5	1.1	-10.44	-21.88	0.0553	0.3055	0.1361	0.1802	10.4	1.17	1547.9	1768.9	22.8583	1.297	1.297	0.805	0.969	0.969	0.487		1.0535	0.246
0.230148	13.8089	0.522	0.83	0	2827.3	984.9	4790.6	1.2	-10.42	-21.77	0.0549	0.3167	0.1399	0.1856	10.7	1.239	1599	1842.4	22.8571	1.35	1.35	0.828	1.002	1.002	0.52		1.09	0.261
0.232982	13.9789	0.566	0.85	0	2927.5	1012.1	4944.7	1.3	-10.41	-21.65	0.0545	0.3279	0.1437	0.191	10.7	1.342	1650.5	1915.5	22.8559	1.413	1.413	0.847	1.036	1.036	0.563		1.1315	0.283
0.233315	13.9989	0.566	0.84	0	2938.4	1015.6	4962.7	1.3	-10.41	-21.63	0.0549	0.3292	0.1442	0.1918	10.7	1.342	1656.6	1922.8	22.8557	1.409	1.409	0.842	1.031	1.031	0.569		1.1245	0.283
0.236232	14.1739	0.566	0.86	0	3038.8	1046.4	5124.1	1.3	-10.39	-21.52	0.0533	0.3404	0.1486	0.1966	10.5	1.343	1710.5	1992.4	22.8543	1.427	1.427	0.861	1.05	1.05	0.567		1.1435	0.283
0.239073	14.3444	0.581	0.88	0	3139.2	1077.6	5286.5	1.3	-10.38	-21.4	0.0529	0.3517	0.153	0.202	10.7	1.379	1764.8	2061.6	22.8529	1.465	1.469	0.888	1.078	1.082	0.585		1.1725	0.2905
0.241808	14.5085	0.596	0.9	0	3239.7	1103.2	5437.7	1.4	-10.37	-21.3	0.0529	0.3629	0.1567	0.2076	11.1	1.414	1815.4	2136.5	22.8517	1.499	1.503	0.907	1.101	1.105	0.599		1.1995	0.298
0.244545	14.6727	0.596	0.92	0	3340.3	1126.8	5585	1.4	-10.36	-21.2	0.056	0.3742	0.16	0.2149	11.4	1.414	1864.6	2213.5	22.8506	1.513	1.513	0.916	1.115	1.115	0.593		1.2165	0.298
0.247355	14.8413	0.641	0.93	0	3440.3	1152.4	5735.8	1.5	-10.34	-21.09	0.0547	0.3854	0.1636	0.2198	11.4	1.518	1915	2288	22.8495	1.576	1.576	0.935	1.148	1.148	0.646		1.253	0.3205
0.250172	15.0103	0.656	0.95	0	3540.4	1174.9	5880.5	1.5	-10.33	-20.99	0.0538	0.3966	0.1668	0.225	11.6	1.553	1963.4	2365.6	22.8484	1.605	1.605	0.949	1.167	1.167	0.655		1.2775	0.328
0.252827	15.1696	0.656	0.96	0	3640.6	1195.4	6021.2	1.5	-10.32	-20.88	0.0545	0.4078	0.1698	0.2309	11.5	1.553	2010.4	2445.3	22.8475	1.619	1.619	0.963	1.181	1.181	0.659		1.2895	0.328
0.255685	15.3411	0.671	0.98	0	3740.9	1218.9	6168.1	1.5	-10.31	-20.78	0.0545	0.4191	0.1731	0.2365	11.7	1.588	2059.6	2522	22.8464	1.647	1.643	0.972	1.2	1.196	0.667		1.3135	0.3355
0.258405	15.5043	0.686	0.99	0	3841.3	1239.4	6309	1.6	-10.29	-20.68	0.052	0.4303	0.176	0.2409	11.9	1.623	2106.7	2601.9	22.8455	1.681	1.681	0.995	1.224	1.224	0.691		1.3355	0.343
0.261158	15.6695	0.716	1.01	0	3941.7	1256.8	6443.8	1.6	-10.28	-20.59	0.0545	0.4416	0.1785	0.2478	12.1	1.693	2151.8	2685	22.8447	1.729	1.729	1.013	1.252	1.252	0.719		1.3695	0.358
0.263853	15.8312	0.731	1.03	0	4042.3	1276.7	6583.8	1.7	-10.26	-20.49	0.0545	0.4528	0.1813	0.2534	12	1.727	2198.6	2765.5	22.8438	1.758	1.758	1.027	1.271	1.271	0.728		1.394	0.3655
0.266647	15.9988	0.746	1.05	0	4141.6	1293.1	6715.4	1.7	-10.25	-20.39	0.0544	0.4639	0.1836	0.2589	12.3	1.762	2242.6	2848.5	22.843	1.792	1.792	1.046	1.294	1.294	0.742		1.421	0.373
0.268707	16.1224	0.879	0.81	0	4241.6	895.3	6023.8	2	-10.24	-20.28	0.0531	0.4751	0.1271	0.2639	11	2.056	2010.7	3346.3	22.8612	1.689	1.689	0.81	1.103	1.103	0.879		1.2495	0.4395
0.271867	16.312	0.894	0.85	0	4341.7	882.5	6098.3	2	-10.23	-20.1	0.0544	0.4864	0.1253	0.2701	11.2	2.092	2035.6	3459.3	22.8618	1.746	1.741	0.847	1.15	1.145	0.896		1.298	0.447
0.2751	16.506	0.909	0.88	0	4441.9	878.4	6190.1	2.1	-10.22	-19.93	0.0533	0.4976	0.1247	0.2752	11.5	2.128	2066.2	3563.6	22.862	1.788	1.788	0.879	1.182	1.182	0.908		1.334	0.4545
0.278292	16.6975	0.909	0.91	0	4542.2	879.9	6293.3	2.1	-10.21	-19.75	0.0538	0.5088	0.125	0.2811	11.8	2.13	2100.7	3662.3	22.8619	1.821	1.821	0.912	1.215	1.215	0.911		1.3655	0.4545
0.28146	16.8876	0.939	0.94	0	4642.6	886.6	6406.7	2.1	-10.2	-19.59	0.0546	0.5201	0.1259	0.2871	11.8	2.2	2138.6	3756	22.8616	1.883	1.883	0.944	1.257	1.257	0.943		1.4115	0.4695
0.284603	17.0762	0.939	0.98	0	4743	900.9	6535.5	2.1	-10.18	-19.42	0.0533	0.5313	0.1279	0.2921	12	2.201	2181.6	3842.1	22.861	1.915	1.915	0.976	1.289	1.289	0.935		1.4475	0.4695
0.287917	17.275	0.939	1	0	4843.5	920.4	6674.5	2.1	-10.17	-19.27	0.0579	0.5426	0.1307	0.3	12.6	2.203	2228.1	3923.1	22.8601	1.943	1.943	1.004	1.317	1.317	0.943		1.4715	0.4695
0.291052	17.4631	0.939	1.03	0	4944.1	943.9	6821.7	2.1	-10.16	-19.12	0.0534	0.5538	0.134	0.3034	12.6	2.205	2277.3	4000.2	22.859	1.971	1.967	1.028	1.345	1.341	0.941		1.5005	0.4695
0.294268	17.6561	0.984	1.06	0	5044.1	970.6	6974.5	2.2	-10.15	-18.97	0.0538	0.565	0.1378	0.3092	12.8	2.308	2328.4	4073.5	22.8578	2.043	2.039	1.056	1.388	1.383	0.983		1.5515	0.492
0.297493	17.8496	0.969	1.08	0	5144.2	999.8	7132.4	2.2	-10.14	-18.83	0.0528	0.5763	0.142	0.3143	13.2	2.276	2381.2	4144.4	22.8564	2.052	2.052	1.083	1.406	1.406	0.972		1.566	0.4845
0.299977	17.9986	0.984	1.1	0	5225.3	1023.3	7260.3	2.2	-10.12	-18.73	0.0529	0.5853	0.1453	0.3189	13.4	2.311	2424	4202	22.8554	2.085	2.085	1.101	1.429	1.429	0.985		1.5925	0.492
0.303023	18.1814	1.014	1.12	0	5325.6	1053.5	7420.3	2.3	-10.11	-18.59	0.054	0.5966	0.1496	0.3251	13.4	2.38	2477.5	4272	22.854	2.138	2.138	1.125	1.462	1.462	1.018		1.629	0.507
0.306167	18.37	1.029	1.15	0	5425.9	1084.3	7581.4	2.4	-10.1	-18.46	0.0543	0.6078	0.154	0.3308	13.5	2.416	2531.5	4341.6	22.8526	2.181	2.185	1.156	1.495	1.499	1.031		1.6655	0.5145
0.30922	18.5532	1.014	1.18	0	5526.2	1116.5	7745.7	2.3	-10.09	-18.34	0.0553	0.619	0.1586	0.3369	13.5	2.383	2586.4	4409.7	22.8511	2.194	2.19	1.176	1.518	1.514	1.014		1.687	0.507
0.312445	18.7467	1.073	1.2	0	5626.6	1149.3	7910.9	2.5	-10.07	-18.21	0.0532	0.6303	0.1632	0.3415	13.8	2.521	2641.7	4477.4	22.8496	2.277	2.277	1.203	1.561	1.561	1.077		1.7385	0.5365
0.31545	18.927	1.059	1.23	0.01	5727.1	1179.5	8071.2	2.4	-10.06	-18.1	0.0526	0.6416	0.1675	0.3469	14.1	2.488	2695.4	4547.7	22.8482	2.29	2.281	1.223	1.584	1.575	1.06		1.76	0.5295
0.318667	19.12	1.103	1.24	0	5827.7	1211.7	8235.6	2.5	-10.04	-17.98	0.0568	0.6528	0.1721	0.3546	14.4	2.591	2750.4	4616	22.8467	2.348	2.344	1.241	1.613	1.608	1.108		1.794	0.5515
0.321907	19.3144	1.133	1.27	0	5928.4	1242.4	8397	2.6	-10.04	-17.86	0.0558	0.6641	0.1764	0.3597	14.7	2.661	2804.4	4685.9	22.8453	2.406	2.402	1.268	1.65	1.646	1.136		1.838	0.5665
0.32505	19.503	1.163	1.29	0	6028.4	1271.6	8554.7	2.7	-10.02	-17.74	0.0527	0.6753	0.1806	0.3638	14.9	2.73	2857.2	4756.8	22.844	2.454	2.454	1.291	1.679	1.679	1.164		1.872	0.5815
0.328162	19.6897	1.178	1.31	0	6128.5	1299.8	8710.4	2.7	-10.01	-17.63	0.0528	0.6865	0.1846	0.3694	15.2	2.766	2909.4	4828.8	22.8427	2.492	2.497	1.318	1.707	1.711	1.182		1.901	0.589
0.331533	19.892	1.163	1.34	0	6228.7	1329.4	8869.3	2.7	-10	-17.52	0.0548	0.6977	0.1888	0.376	15.3	2.733	2962.5	4899.3	22.8414	2.501	2.497	1.333	1.725	1.721	1.161		1.9205	0.5815
0.333308	19.9985	1.193	1.36	0	6283.5	1345.8	8956.4	2.7	-9.99	-17.47	0.054	0.7039	0.1911	0.3787	15.3	2.802	2991.7	4937.7	22.8406	2.549	2.545	1.352	1.754	1.749	1.189		1.9545	0.5965
0.336598	20.1959	1.238	1.37	0	6383.8	1372.9	9110.2	2.8	-9.97	-17.36	0.0532	0.7151	0.195	0.3839	15.4	2.905	3043.2	5010.8	22.8394	2.612	2.608	1.37	1.787	1.783	1.242		1.991	0.619
0.339863	20.3918	1.238	1.4	0	6484.1	1400	9264.1	2.8	-9.96	-17.26	0.0534	0.7264	0.1988	0.3897	15.8	2.907	3094.7	5084.1	22.8381	2.636	2.636	1.398	1.81	1.81	1.236		2.018	0.619
0.343153	20.5892	1.298	1.42	0	6584.6	1425.1	9414	3	-9.95	-17.15	0.0549	0.7376	0.2024	0.396	16	3.044	3144.9	5159.5	22.837	2.718	2.718	1.421	1.853	1.853	1.298		2.069	0.649
0.346607	20.7964	1.283	1.45	0	6685.1	1449.7	9563	2.9	-9.94	-17.05	0.0537	0.7489	0.2059	0.4011	16.2	3.012	3194.8	5235.4	22.8359	2.731	2.727	1.444	1.876	1.872	1.281		2.0905	0.6415
0.350043	21.0026	1.358	1.46	0.01	6785.6	1473.7	9710.9	3.1	-9.93	-16.95	0.0547	0.7601	0.2093	0.4072	16.3	3.183	3244.3	5311.9	22.8348	2.82	2.812	1.454	1.915	1.907	1.36		2.14	0.679
0.353537	21.2122	1.358	1.49	0.01	6886.2	1497.8	9858.9	3.1	-9.92	-16.86	0.0525	0.7714	0.2127	0.4117	16.5	3.184	3293.9	5388.5	22.8337	2.843	2.835	1.477	1.938	1.93	1.353		2.1665	0.679
0.357038	21.4223	1.388	1.51	0.01	6986.3	1520.8	10004.3	3.2	-9.9	-16.76	0.0539	0.7826	0.216	0.418	16.9	3.254	3342.6	5465.5	22.8326	2.896	2.888	1.5	1.971	1.963	1.386		2.203	0.694
0.360743	21.6446	1.417	1.53	0	7086.4	1544.3	10150.7	3.2	-9.89	-16.66	0.0542	0.7938	0.2193	0.4238	16.9	3.323	3391.7	5542.1	22.8315	2.945	2.945	1.527	2	2	1.415		2.2375	0.7085
0.364203	21.8522	1.447	1.55	0	7186.5	1563.7	10289.1	3.3	-9.88	-16.57	0.0532	0.805	0.2221	0.4289	17.1	3.392	3438	5622.8	22.8306	2.993	2.989	1.541	2.028	2.024	1.443		2.2715	0.7235
0.366638	21.9983	1.492	1.55	0	7253.5	1561.7	10351.8	3.4	-9.87	-16.51	0.0539	0.8125	0.2218	0.433	17.1	3.494	3459	5691.9	22.8307	3.038	3.038	1.546	2.043	2.043	1.488		2.294	0.746
0.370352	22.2211	1.492	1.55	0	7353.8	1565.8	10459.9	3.4	-9.86	-16.4	0.0554	0.8238	0.2224	0.4393	17.2	3.495	3495.1	5788	22.8305	3.047	3.051	1.559	2.052	2.056	1.497		2.2985	0.746
0.374327	22.4596	1.522	1.59	0	7454.1	1583.2	10594.3	3.5	-9.84	-16.3	0.0537	0.835	0.2248	0.4441	17.2	3.565	3540.1	5870.9	22.8298	3.109	3.109	1.587	2.095	2.095	1.519		2.3495	0.761
0.3783	22.698	1.567	1.61	0	7554.5	1603.6	10734.9	3.6	-9.83	-16.2	0.0532	0.8463	0.2277	0.4495	17.9	3.668	3587.2	5950.9	22.8288	3.177	3.173	1.606	2.133	2.129	1.567		2.3935	0.7835
0.382347	22.9408	1.627	1.62	0.01	7654.9	1621.5	10870.5	3.7	-9.81	-16.1	0.0535	0.8575	0.2303	0.4553	18.1	3.805	3632.7	6033.4	22.828	3.251	3.243	1.616	2.167	2.158	1.631		2.4355	0.8135
0.386403	23.1842	1.627	1.65	0	7755.4	1643	11013.2	3.7	-9.8	-16.01	0.0547	0.8688	0.2333	0.4615	18.2	3.807	3680.5	6112.4	22.827	3.279	3.275	1.648	2.194	2.19	1.629		2.4645	0.8135
0.390735	23.4441	1.657	1.67	0	7856	1664.5	11156	3.8	-9.8	-15.9	0.054	0.88	0.2364	0.4668	18.4	3.876	3728.3	6191.5	22.826	3.327	3.327	1.671	2.223	2.223	1.657		2.4985	0.8285
0.394928	23.6957	1.686	1.7	0	7956.6	1684.4	11295.8	3.8	-9.79	-15.81	0.0552	0.8913	0.2392	0.473	18.5	3.946	3775.1	6272.2	22.8251	3.385	3.381	1.694	2.261	2.256	1.685		2.5425	0.843
0.39922	23.9532	1.731	1.72	0	8056.6	1703.3	11432.9	4	-9.77	-15.71	0.0543	0.9025	0.2419	0.4782	18.9	4.049	3821.1	6353.3	22.8243	3.448	3.444	1.713	2.294	2.29	1.728		2.584	0.8655
0.39997	23.9982	1.761	1.72	0	8073.3	1706.4	11455.6	4	-9.77	-15.69	0.0552	0.9044	0.2423	0.4795	18.8	4.117	3828.7	6366.9	22.8241	3.483	3.483	1.722	2.309	2.309	1.763		2.6015	0.8805
0.404563	24.2738	1.746	1.75	0	8173.4	1725.3	11592.8	4	-9.75	-15.6	0.0547	0.9156	0.245	0.4849	19	4.085	3874.7	6448	22.8233	3.496	3.491	1.745	2.331	2.327	1.746		2.623	0.873
0.40922	24.5532	1.836	1.77	0	8273.5	1746.8	11735.1	4.2	-9.74	-15.5	0.0535	0.9268	0.2481	0.4899	19.2	4.29	3922.3	6526.7	22.8223	3.604	3.604	1.768	2.38	2.38	1.834		2.687	0.918
0.414	24.84	1.821	1.79	0	8373.7	1765.2	11871.4	4.2	-9.74	-15.4	0.053	0.938	0.2507	0.4953	19.2	4.257	3968	6608.5	22.8214	3.607	3.607	1.786	2.393	2.393	1.817		2.6985	0.9105
0.418878	25.1327	1.881	1.81	0	8473.9	1783.6	12007.7	4.3	-9.72	-15.32	0.0542	0.9492	0.2533	0.5015	19.9	4.395	4013.7	6690.3	22.8206	3.69	3.686	1.805	2.436	2.432	1.88		2.75	0.9405
0.42396	25.4376	1.911	1.84	0	8574.2	1804	12148.1	4.4	-9.71	-15.21	0.0564	0.9605	0.2562	0.5082	19.9	4.464	4060.8	6770.2	22.8197	3.748	3.752	1.841	2.474	2.478	1.908		2.794	0.9555
0.429358	25.7615	1.941	1.86	0	8674.6	1823.5	12286.5	4.4	-9.69	-15.11	0.0526	0.9717	0.2589	0.5119	19.8	4.534	4107.2	6851.1	22.8188	3.801	3.797	1.856	2.507	2.503	1.941		2.8305	0.9705
0.4333	25.998	1.986	1.87	0	8746.2	1837.3	12385.2	4.5	-9.68	-15.04	0.054	0.9797	0.2609	0.5166	19.8	4.637	4140.2	6908.9	22.8181	3.86	3.856	1.87	2.536	2.532	1.99		2.865	0.993
0.438838	26.3303	1.986	1.9	0	8846.6	1857.7	12525.7	4.5	-9.68	-14.94	0.0542	0.991	0.2638	0.5224	20.1	4.638	4187.3	6988.9	22.8172	3.888	3.883	1.898	2.564	2.56	1.988		2.894	0.993
0.444798	26.6879	2.045	1.92	0	8947.1	1878.7	12667.3	4.7	-9.66	-14.83	0.055	1.0023	0.2668	0.5284	20.5	4.776	4234.8	7068.5	22.8162	3.966	3.962	1.916	2.602	2.598	2.046		2.943	1.0225
0.450947	27.0568	2.06	1.95	0	9047.7	1900.6	12811	4.7	-9.65	-14.72	0.0543	1.0135	0.2699	0.5337	20.6	4.812	4283	7147	22.8152	4.013	4.013	1.953	2.64	2.64	2.063		2.9815	1.03
0.457405	27.4443	2.09	1.98	0.01	9148.3	1926.2	12961.7	4.8	-9.64	-14.61	0.0542	1.0248	0.2735	0.5392	20.9	4.881	4333.6	7222.1	22.8141	4.071	4.063	1.972	2.677	2.669	2.091		3.0255	1.045
0.464857	27.8914	2.15	2	0	9248.9	1957.9	13124.7	4.9	-9.62	-14.47	0.0541	1.0361	0.278	0.5448	20.9	5.019	4388.2	7291.1	22.8126	4.154	4.15	2	2.721	2.716	2.154		3.077	1.075
0.466632	27.9979	2.135	2.01	0	9271.1	1965.5	13161.9	4.9	-9.62	-14.44	0.054	1.0385	0.2791	0.546	21	4.985	4400.7	7305.5	22.8123	4.148	4.144	2.009	2.725	2.721	2.138		3.079	1.0675
0.475427	28.5256	2.18	2.05	0	9371.1	2006.9	13343.4	5	-9.6	-14.3	0.055	1.0498	0.285	0.5522	21.2	5.09	4461.7	7364.2	22.8104	4.23	4.23	2.05	2.777	2.777	2.18		3.14	1.09
0.485523	29.1314	2.196	2.08	0	9471.2	2059.1	13546.1	5	-9.59	-14.13	0.0542	1.061	0.2924	0.5574	21.7	5.126	4529.8	7412.2	22.808	4.278	4.282	2.087	2.814	2.819	2.198		3.179	1.098
0.497543	29.8526	2.226	2.12	0	9571.4	2121.4	13769.1	5.1	-9.58	-13.94	0.0531	1.0722	0.3013	0.5624	21.8	5.196	4604.7	7450	22.8051	4.35	4.35	2.124	2.866	2.866	2.23		3.235	1.113
0.499962	29.9977	2.226	2.13	0	9590.2	2132.1	13809.1	5.1	-9.58	-13.91	0.0523	1.0743	0.3028	0.563	22.1	5.196	4618.1	7458.1	22.8047	4.355	4.35	2.125	2.871	2.867	2.225		3.2425	1.113
0.51449	30.8694	2.241	2.16	0	9690.4	2192.4	14027.9	5.1	-9.57	-13.75	0.0557	1.0855	0.3113	0.5704	22.2	5.232	4691.7	7498	22.8019	4.402	4.398	2.157	2.908	2.904	2.242		3.281	1.1205
0.533293	31.9976	2.286	2.19	0	9787.3	2251.6	14241.5	5.2	-9.55	-13.62	0.0542	1.0964	0.3198	0.575	22.1	5.336	4763.5	7535.6	22.7992	4.475	4.471	2.185	2.951	2.947	2.285		3.3325	1.143
0.563847	33.8308	2.331	2.21	0.01	9887.6	2314	14464.5	5.3	-9.54	-13.53	0.0542	1.1076	0.3286	0.5807	21.9	5.439	4838.5	7573.6	22.7963	4.543	4.535	2.204	2.989	2.981	2.333		3.3765	1.1655
0.566623	33.9974	2.316	2.2	0	9893.7	2317.5	14477.6	5.3	-9.54	-13.52	0.054	1.1083	0.3291	0.5809	21.9	5.405	4842.9	7576.1	22.7962	4.519	4.519	2.203	2.975	2.975	2.319		3.3595	1.158
0.599955	35.9973	2.302	2.2	0	9941.5	2357.9	14604.8	5.2	-9.53	-13.51	0.0537	1.1136	0.3348	0.5834	21.4	5.371	4885.7	7583.6	22.7943	4.5	4.5	2.198	2.965	2.965	2.3		3.35	1.151
0.633285	37.9971	2.287	2.19	0.01	9958.3	2387	14679.1	5.2	-9.52	-13.54	0.0533	1.1155	0.339	0.5842	20.7	5.336	4910.8	7571.3	22.793	4.476	4.467	2.181	2.951	2.943	2.286		3.333	1.1435
0.666617	39.997	2.272	2.18	0	9959.7	2407.4	14720.8	5.2	-9.53	-13.58	0.0537	1.1157	0.3419	0.5845	20.1	5.301	4924.8	7552.2	22.7921	4.447	4.443	2.171	2.932	2.928	2.267		3.3135	1.136
0.699947	41.9968	2.257	2.16	0	9957	2423.3	14749.4	5.1	-9.52	-13.63	0.0553	1.1154	0.3441	0.5851	19.7	5.266	4934.5	7533.7	22.7913	4.413	4.413	2.157	2.909	2.909	2.253		3.2865	1.1285
0.733278	43.9967	2.212	2.14	0	9951.6	2436.5	14770.3	5	-9.53	-13.68	0.0553	1.1148	0.346	0.5848	18.9	5.163	4941.5	7515	22.7907	4.355	4.351	2.138	2.88	2.876	2.215		3.2475	1.106
0.766608	45.9965	2.182	2.13	0	9944.2	2445.7	14781.1	5	-9.53	-13.72	0.0541	1.1139	0.3473	0.5838	18.2	5.094	4945.2	7498.4	22.7903	4.316	4.312	2.129	2.861	2.857	2.186		3.223	1.091
0.79994	47.9964	2.167	2.11	0	9934.1	2453.9	14787.1	4.9	-9.54	-13.76	0.0534	1.1128	0.3485	0.5828	17.6	5.059	4947.3	7480.2	22.7899	4.278	4.282	2.114	2.833	2.837	2.168		3.194	1.0835
0.83327	49.9962	2.138	2.11	0	9926.7	2462.6	14796.9	4.9	-9.54	-13.79	0.0532	1.112	0.3497	0.5823	17.5	4.991	4950.6	7464.1	22.7896	4.243	4.243	2.106	2.818	2.818	2.133		3.1765	1.069
0.866602	51.9961	2.138	2.09	0	9919.9	2470.8	14806.3	4.9	-9.54	-13.81	0.055	1.1112	0.3509	0.5829	16.9	4.99	4953.8	7449.2	22.7892	4.229	4.225	2.088	2.804	2.8	2.139		3.1595	1.069
0.899932	53.9959	2.093	2.09	0	9913.9	2475.9	14810.4	4.8	-9.54	-13.83	0.0537	1.1105	0.3516	0.5819	16.6	4.887	4955.2	7438	22.7889	4.18	4.18	2.087	2.785	2.785	2.09		3.135	1.0465
0.933263	55.9958	2.108	2.08	0	9904.4	2481.5	14812.1	4.8	-9.54	-13.87	0.0526	1.1095	0.3524	0.5808	16.4	4.921	4955.8	7423	22.7887	4.186	4.181	2.074	2.78	2.776	2.106		3.133	1.054
0.966593	57.9956	2.093	2.07	0	9901.7	2486.6	14819.5	4.8	-9.54	-13.88	0.0552	1.1092	0.3531	0.5819	16.3	4.886	4958.3	7415.2	22.7885	4.161	4.161	2.069	2.766	2.766	2.091		3.1155	1.0465
0.999923	59.9954	2.093	2.06	0	9895	2490.7	14820.9	4.8	-9.53	-13.89	0.0557	1.1084	0.3537	0.5818	16	4.886	4958.8	7404.3	22.7883	4.157	4.157	2.064	2.762	2.762	2.097		3.1085	1.0465
1.03326	61.9953	2.093	2.05	0	9891.6	2496.3	14828.7	4.8	-9.53	-13.91	0.0547	1.1081	0.3545	0.5812	15.7	4.885	4961.4	7395.4	22.788	4.148	4.148	2.055	2.752	2.752	2.098		3.099	1.0465
1.06659	63.9951	2.063	2.05	0	9884.9	2500.4	14830	4.7	-9.54	-13.92	0.0546	1.1073	0.3551	0.5807	15.5	4.817	4961.9	7384.5	22.7878	4.113	4.113	2.05	2.738	2.738	2.063		3.0815	1.0315
1.0929	65.5738	2.063	2.05	0	9880.9	2504.5	14834	4.7	-9.54	-13.93	0.0499	1.1069	0.3557	0.5781	15.4	4.817	4963.3	7376.4	22.7876	4.108	4.108	2.045	2.733	2.733	2.058		3.079	1.0315
1.12622	67.5732	2.048	2.04	0	9877.5	2509.6	14840.8	4.7	-9.54	-13.94	0.0516	1.1065	0.3564	0.5788	15.5	4.783	4965.5	7367.9	22.7874	4.089	4.089	2.041	2.724	2.724	2.049		3.0645	1.024
1.15955	69.573	2.063	2.04	0.01	9874.8	2512.6	14844.2	4.7	-9.54	-13.95	0.055	1.1062	0.3568	0.5804	15.1	4.817	4966.7	7362.2	22.7873	4.104	4.096	2.032	2.729	2.72	2.064		3.072	1.0315
1.19288	71.5729	2.033	2.04	0	9870.8	2514.7	14844.2	4.6	-9.53	-13.96	0.0525	1.1057	0.3571	0.5789	15.3	4.748	4966.7	7356.1	22.7872	4.069	4.069	2.036	2.714	2.714	2.029		3.0545	1.0165
1.22621	73.5727	2.018	2.03	0	9866.7	2517.7	14846.2	4.6	-9.53	-13.98	0.055	1.1053	0.3575	0.5799	15.2	4.714	4967.4	7349	22.787	4.05	4.046	2.027	2.704	2.7	2.02		3.04	1.009
1.25954	75.5726	2.018	2.03	0	9866	2520.3	14850.6	4.6	-9.53	-13.99	0.0555	1.1052	0.3579	0.5801	14.9	4.714	4968.9	7345.8	22.7869	4.05	4.046	2.027	2.704	2.7	2.02		3.04	1.009
1.29287	77.5724	2.018	2.02	0	9862.7	2522.8	14852.3	4.6	-9.53	-14	0.0552	1.1048	0.3583	0.5798	15.1	4.713	4969.5	7339.8	22.7868	4.041	4.036	2.018	2.695	2.691	2.021		3.0305	1.009
1.32621	79.5723	2.033	2.02	0.01	9858.6	2525.4	14853.3	4.6	-9.53	-14	0.0549	1.1044	0.3586	0.5794	14.6	4.747	4969.8	7333.3	22.7867	4.055	4.047	2.014	2.7	2.692	2.035		3.0375	1.0165
1.35954	81.5721	2.033	2.02	0.01	9858	2529	14859.7	4.6	-9.53	-14.01	0.0547	1.1043	0.3591	0.5792	14.8	4.747	4972	7329	22.7865	4.056	4.047	2.014	2.7	2.692	2.036		3.038	1.0165
1.39287	83.572	2.003	2.01	0.01	9856.6	2531.5	14863.4	4.6	-9.53	-14.01	0.0539	1.1041	0.3595	0.5788	14.8	4.679	4973.2	7325.1	22.7864	4.016	4.008	2.005	2.681	2.672	2.006		3.013	1.0015
1.4262	85.5718	2.033	2.01	0.01	9851.9	2535.1	14865.8	4.6	-9.53	-14.01	0.0539	1.1036	0.36	0.5785	14.7	4.747	4974	7316.8	22.7862	4.046	4.038	2.005	2.691	2.682	2.036		3.028	1.0165
1.45953	87.5717	2.018	2.02	0.01	9850.6	2537.6	14869.5	4.6	-9.53	-14.02	0.0528	1.1035	0.3604	0.5779	14.4	4.713	4975.3	7312.9	22.7861	4.041	4.032	2.014	2.695	2.687	2.021		3.0305	1.009
1.49286	89.5715	2.018	2.01	0.01	9848.5	2540.2	14872.5	4.6	-9.53	-14.02	0.053	1.1032	0.3607	0.5779	14.9	4.713	4976.3	7308.3	22.786	4.031	4.023	2.005	2.686	2.677	2.021		3.0205	1.009
1.52619	91.5714	2.003	2.01	0.01	9845.9	2542.8	14874.9	4.6	-9.53	-14.02	0.0537	1.1029	0.3611	0.5781	14.6	4.678	4977.1	7303.1	22.7859	4.012	4.003	2	2.676	2.668	2.002		3.011	1.0015
1.55952	93.5712	2.033	2.01	0.01	9846.5	2545.3	14880.6	4.6	-9.53	-14.03	0.0546	1.103	0.3615	0.5786	14.5	4.747	4979	7301.2	22.7858	4.046	4.034	2.001	2.691	2.678	2.036		3.028	1.0165
1.59285	95.5711	2.018	2	0	9845.9	2548.4	14886	4.6	-9.54	-14.03	0.0543	1.1029	0.3619	0.5784	14.5	4.712	4980.9	7297.5	22.7856	4.018	4.013	1.995	2.672	2.668	2.018		3.009	1.009
1.62618	97.5709	2.003	2	0	9843.2	2551.4	14889.4	4.6	-9.54	-14.03	0.0549	1.1026	0.3623	0.5785	14.7	4.678	4982	7291.7	22.7855	4.007	4.003	2	2.672	2.667	2.007		3.0035	1.0015
1.65951	99.5708	2.003	2.01	0.01	9842.5	2555	14895.7	4.6	-9.53	-14.02	0.0526	1.1026	0.3628	0.5774	14.7	4.678	4984.2	7287.5	22.7853	4.012	4.003	2	2.676	2.668	2.002		3.011	1.0015
1.69285	101.571	2.003	2	0	9841.1	2558.1	14900.5	4.6	-9.54	-14.02	0.0549	1.1024	0.3633	0.5784	14.7	4.678	4985.8	7283.1	22.7852	4.007	4.003	2	2.672	2.667	2.007		3.0035	1.0015
1.72617	103.57	2.033	2	0.01	9839.1	2561.1	14904.5	4.6	-9.53	-14.02	0.0526	1.1022	0.3637	0.5772	14.6	4.746	4987.1	7278	22.7851	4.037	4.029	1.995	2.682	2.673	2.037		3.0185	1.0165
1.7425	104.55	2.033	2.01	0	9837.8	2563.2	14907.2	4.6	-9.53	-14.02	0.0487	1.102	0.364	0.5751	14.8	4.747	4988	7274.6	22.785	4.042	4.038	2.004	2.686	2.682	2.032		3.026	1.0165
1.77582	106.549	2.018	2	0	9837.1	2565.7	14911.6	4.6	-9.54	-14.01	0.0529	1.102	0.3644	0.5772	15.3	4.712	4989.5	7271.4	22.7848	4.022	4.018	2	2.677	2.672	2.022		3.011	1.009
1.80915	108.549	2.018	2.01	0	9837.8	2567.3	14915.2	4.6	-9.54	-14	0.0555	1.102	0.3646	0.5785	15.7	4.713	4990.8	7270.5	22.7848	4.027	4.023	2.004	2.681	2.677	2.017		3.0185	1.009
1.84248	110.549	2.033	2	0	9838.4	2569.8	14921	4.6	-9.54	-14.01	0.054	1.1021	0.3649	0.5778	15.9	4.746	4992.7	7268.6	22.7847	4.037	4.033	2	2.682	2.677	2.037		3.0185	1.0165
1.87582	112.549	2.033	2	0	9837.8	2571.9	14924.3	4.6	-9.54	-14.01	0.054	1.102	0.3652	0.5778	15.8	4.746	4993.8	7265.9	22.7846	4.037	4.037	2.004	2.682	2.682	2.037		3.0185	1.0165
1.90913	114.548	2.033	2	0	9837.8	2572.4	14925.3	4.6	-9.55	-14.02	0.0519	1.102	0.3653	0.5767	15.9	4.746	4994.2	7265.4	22.7845	4.033	4.033	1.999	2.677	2.677	2.033		3.0165	1.0165
1.94247	116.548	2.048	1.99	0	9837.8	2574.4	14929.4	4.7	-9.54	-14.03	0.0554	1.102	0.3656	0.5785	15.8	4.78	4995.5	7263.4	22.7844	4.043	4.039	1.99	2.677	2.673	2.053		3.0165	1.024
1.9758	118.548	2.048	1.99	0	9839.1	2574.4	14930.7	4.7	-9.54	-14.04	0.053	1.1022	0.3656	0.5773	15.4	4.78	4996	7264.7	22.7844	4.038	4.038	1.99	2.673	2.673	2.048		3.014	1.024
2.00913	120.548	2.048	1.99	0	9837.1	2574.4	14928.7	4.7	-9.54	-14.06	0.0559	1.102	0.3656	0.5787	15.8	4.779	4995.3	7262.7	22.7844	4.034	4.029	1.981	2.668	2.664	2.044		3.012	1.024
2.04247	122.548	2.063	1.98	0.01	9838.4	2573.9	14929.1	4.7	-9.53	-14.08	0.0539	1.1021	0.3655	0.5777	15.8	4.813	4995.4	7264.5	22.7845	4.044	4.036	1.972	2.668	2.66	2.064		3.012	1.0315
2.0758	124.548	2.048	1.98	0	9837.1	2573.4	14926.7	4.7	-9.54	-14.11	0.0542	1.102	0.3654	0.5778	15.8	4.779	4994.6	7263.7	22.7845	4.024	4.029	1.98	2.659	2.663	2.044		3.002	1.024
2.10912	126.547	2.063	1.96	0	9838.4	2571.3	14924	4.7	-9.54	-14.14	0.0534	1.1021	0.3652	0.5775	15.5	4.812	4993.7	7267.1	22.7846	4.025	4.025	1.962	2.65	2.65	2.065		2.9925	1.0315
2.14245	128.547	2.048	1.95	0	9838.4	2569.8	14921	4.7	-9.54	-14.18	0.0553	1.1021	0.3649	0.5785	15.2	4.778	4992.7	7268.6	22.7847	4.001	4.001	1.953	2.636	2.636	2.051		2.9755	1.024
2.17578	130.547	2.048	1.95	0	9838.4	2567.3	14915.9	4.7	-9.55	-14.21	0.0543	1.1021	0.3646	0.578	15.1	4.777	4991	7271.2	22.7848	3.997	3.992	1.944	2.631	2.627	2.047		2.9735	1.024
2.20912	132.547	2.063	1.93	-0.01	9837.1	2563.7	14907.5	4.7	-9.54	-14.24	0.0547	1.102	0.3641	0.5781	15.4	4.811	4988.2	7273.4	22.7849	3.998	4.006	1.943	2.622	2.63	2.068		2.964	1.0315
2.24245	134.547	2.078	1.93	0	9837.1	2561.1	14902.5	4.7	-9.54	-14.27	0.0539	1.102	0.3637	0.5777	15.1	4.845	4986.5	7276	22.7851	4.013	4.013	1.934	2.627	2.627	2.083		2.9715	1.039
2.27578	136.547	2.063	1.92	0	9838.4	2559.1	14899.8	4.7	-9.54	-14.3	0.0559	1.1021	0.3634	0.5788	14.8	4.81	4985.5	7279.4	22.7851	3.984	3.984	1.921	2.608	2.608	2.064		2.952	1.0315
2.30912	138.547	2.063	1.92	0	9839.8	2556.5	14896.1	4.7	-9.54	-14.32	0.0543	1.1023	0.3631	0.578	14.9	4.81	4984.3	7283.3	22.7853	3.979	3.983	1.92	2.604	2.608	2.059		2.9495	1.0315
2.34243	140.546	2.063	1.91	0	9837.8	2556.5	14894.1	4.7	-9.54	-14.33	0.054	1.102	0.3631	0.5778	14.7	4.809	4983.6	7281.2	22.7853	3.974	3.974	1.911	2.599	2.599	2.064		2.942	1.0315
2.37577	142.546	2.078	1.91	0	9838.4	2556	14893.8	4.7	-9.55	-14.34	0.0529	1.1021	0.363	0.5773	14.6	4.843	4983.5	7282.4	22.7853	3.985	3.989	1.911	2.599	2.604	2.075		2.9475	1.039
2.4091	144.546	2.063	1.9	-0.01	9837.1	2555	14890.4	4.7	-9.56	-14.35	0.055	1.102	0.3628	0.5782	15	4.809	4982.4	7282.1	22.7853	3.965	3.974	1.91	2.59	2.598	2.065		2.9325	1.0315
2.44243	146.546	2.108	1.91	0	9837.1	2555	14890.4	4.8	-9.55	-14.36	0.0552	1.102	0.3628	0.5783	14.7	4.911	4982.4	7282.1	22.7853	4.015	4.019	1.911	2.609	2.613	2.105		2.9625	1.054
2.47577	148.546	2.048	1.91	0	9838.4	2555.5	14892.7	4.7	-9.55	-14.35	0.055	1.1021	0.3629	0.5783	15	4.775	4983.2	7282.9	22.7853	3.955	3.959	1.911	2.589	2.594	2.045		2.9325	1.024
2.5091	150.546	2.093	1.91	0	9837.1	2555	14890.4	4.8	-9.55	-14.35	0.0547	1.102	0.3628	0.5781	14.9	4.877	4982.4	7282.1	22.7853	4.004	4.009	1.915	2.609	2.613	2.094		2.957	1.0465
2.54242	152.545	2.063	1.91	0	9837.8	2556	14893.1	4.7	-9.55	-14.34	0.0549	1.102	0.363	0.5782	14.9	4.809	4983.3	7281.7	22.7853	3.97	3.97	1.907	2.594	2.594	2.06		2.94	1.0315
2.57575	154.545	2.063	1.91	0	9837.8	2556.5	14894.1	4.7	-9.55	-14.34	0.054	1.102	0.3631	0.5778	14.9	4.809	4983.6	7281.2	22.7853	3.97	3.97	1.907	2.594	2.594	2.06		2.94	1.0315
2.60908	156.545	2.078	1.91	0	9838.4	2557.1	14895.8	4.7	-9.54	-14.33	0.0552	1.1021	0.3631	0.5784	15.5	4.843	4984.2	7281.4	22.7852	3.985	3.985	1.907	2.599	2.599	2.075		2.9475	1.039
2.64242	158.545	2.033	1.92	0	9838.4	2559.1	14899.8	4.6	-9.55	-14.33	0.0549	1.1021	0.3634	0.5783	15.4	4.741	4985.5	7279.4	22.7851	3.949	3.953	1.92	2.594	2.598	2.029		2.9345	1.0165
2.67575	160.545	2.078	1.91	0	9837.1	2560.6	14901.5	4.7	-9.55	-14.32	0.0539	1.102	0.3636	0.5777	15.4	4.843	4986.1	7276.5	22.7851	3.989	3.994	1.915	2.604	2.608	2.079		2.9495	1.039
2.70908	162.545	2.078	1.91	0	9837.8	2561.6	14904.1	4.7	-9.55	-14.3	0.0538	1.102	0.3638	0.5777	15.4	4.843	4987	7276.1	22.785	3.989	3.994	1.915	2.604	2.608	2.079		2.9495	1.039
2.74242	164.545	2.063	1.92	0	9838.4	2563.2	14907.9	4.7	-9.54	-14.3	0.0545	1.1021	0.364	0.5781	15.2	4.81	4988.3	7275.3	22.785	3.979	3.983	1.92	2.604	2.608	2.059		2.9495	1.0315
2.77573	166.544	2.078	1.92	0	9838.4	2565.2	14911.9	4.7	-9.54	-14.3	0.0534	1.1021	0.3643	0.5775	15.3	4.844	4989.6	7273.2	22.7849	3.994	3.994	1.916	2.609	2.609	2.074		2.957	1.039
2.80907	168.544	2.093	1.92	0	9836.4	2565.2	14909.9	4.8	-9.54	-14.3	0.0551	1.1019	0.3643	0.5782	15.5	4.878	4989	7271.2	22.7849	4.009	4.009	1.916	2.614	2.614	2.089		2.9645	1.0465
2.8424	170.544	2.078	1.92	0	9837.8	2565.7	14912.2	4.7	-9.54	-14.3	0.0531	1.102	0.3644	0.5773	15.4	4.844	4989.7	7272	22.7848	3.994	3.994	1.916	2.609	2.609	2.074		2.957	1.039
2.87573	172.544	2.078	1.91	0	9837.8	2567.3	14915.2	4.7	-9.55	-14.3	0.056	1.102	0.3646	0.5788	15.3	4.843	4990.8	7270.5	22.7848	3.989	3.985	1.907	2.604	2.6	2.079		2.9495	1.039
2.90907	174.544	2.063	1.91	0	9837.8	2566.8	14914.2	4.7	-9.55	-14.3	0.0556	1.102	0.3645	0.5786	15.5	4.809	4990.4	7271	22.7848	3.975	3.97	1.907	2.599	2.595	2.065		2.9425	1.0315
2.9424	176.544	2.063	1.91	0.01	9838.4	2568.3	14918	4.7	-9.54	-14.3	0.0547	1.1021	0.3647	0.5782	15.7	4.809	4991.7	7270.2	22.7847	3.97	3.962	1.898	2.594	2.586	2.06		2.94	1.0315
2.97573	178.544	2.048	1.91	0.01	9836.4	2569.3	14918	4.7	-9.54	-14.3	0.0536	1.1019	0.3649	0.5775	14.7	4.775	4991.7	7267.1	22.7847	3.96	3.951	1.903	2.594	2.586	2.05		2.935	1.024
3.00905	180.543	2.048	1.91	0.01	9837.8	2569.3	14919.3	4.7	-9.54	-14.31	0.0534	1.102	0.3649	0.5775	15.3	4.775	4992.1	7268.5	22.7847	3.955	3.947	1.898	2.589	2.581	2.045		2.9325	1.024
3.04238	182.543	2.078	1.91	0.01	9837.8	2569.8	14920.3	4.7	-9.54	-14.31	0.0537	1.102	0.3649	0.5776	15.5	4.843	4992.5	7268	22.7847	3.985	3.976	1.898	2.599	2.591	2.075		2.9475	1.039
3.07572	184.543	2.063	1.9	0	9837.1	2569.3	14918.6	4.7	-9.55	-14.33	0.0539	1.102	0.3649	0.5777	15.5	4.808	4991.9	7267.8	22.7847	3.961	3.956	1.893	2.585	2.581	2.061		2.9305	1.0315
3.10905	186.543	2.078	1.89	0	9839.8	2568.8	14920.3	4.7	-9.55	-14.34	0.0537	1.1023	0.3648	0.5777	15.5	4.842	4992.5	7271	22.7847	3.971	3.967	1.889	2.585	2.581	2.081		2.9305	1.039
3.14238	188.543	2.078	1.89	0	9837.8	2569.3	14919.3	4.7	-9.54	-14.35	0.0553	1.102	0.3649	0.5784	15.3	4.842	4992.1	7268.5	22.7847	3.971	3.967	1.889	2.585	2.581	2.081		2.9305	1.039
3.17572	190.543	2.078	1.89	0	9837.8	2568.8	14918.3	4.7	-9.55	-14.36	0.0546	1.102	0.3648	0.5781	15.5	4.842	4991.8	7269	22.7847	3.966	3.966	1.888	2.581	2.581	2.076		2.928	1.039
3.20903	192.542	2.078	1.88	0	9839.1	2567.8	14917.6	4.7	-9.54	-14.38	0.0532	1.1022	0.3646	0.5774	15.2	4.841	4991.6	7271.3	22.7847	3.957	3.953	1.875	2.572	2.567	2.077		2.9185	1.039
3.24237	194.542	2.063	1.88	0	9836.4	2567.3	14913.9	4.7	-9.54	-14.4	0.0545	1.1019	0.3646	0.578	15.2	4.808	4990.3	7269.2	22.7848	3.947	3.943	1.879	2.571	2.567	2.067		2.9135	1.0315
3.2757	196.542	2.093	1.87	0	9840.5	2565.2	14913.9	4.8	-9.55	-14.41	0.0552	1.1023	0.3643	0.5785	15.1	4.875	4990.3	7275.2	22.7849	3.967	3.963	1.87	2.572	2.568	2.097		2.9185	1.0465
3.30903	198.542	2.078	1.87	0.01	9837.1	2564.7	14909.5	4.7	-9.54	-14.43	0.0545	1.102	0.3642	0.578	15.1	4.841	4988.8	7272.4	22.7849	3.948	3.939	1.861	2.562	2.554	2.078		2.909	1.039
3.34237	200.542	2.078	1.86	0.01	9838.4	2562.7	14906.9	4.7	-9.54	-14.44	0.0555	1.1021	0.3639	0.5785	15	4.841	4987.9	7275.8	22.785	3.943	3.935	1.857	2.558	2.549	2.083		2.9015	1.039
3.3757	202.542	2.093	1.86	0.01	9836.4	2561.6	14902.8	4.8	-9.54	-14.46	0.0541	1.1019	0.3638	0.5777	14.8	4.875	4986.6	7274.8	22.785	3.958	3.95	1.857	2.563	2.554	2.098		2.909	1.0465
3.40903	204.542	2.108	1.86	0.01	9837.8	2559.6	14900.1	4.8	-9.54	-14.47	0.0539	1.102	0.3635	0.5777	15.1	4.909	4985.7	7278.2	22.7851	3.968	3.96	1.852	2.563	2.555	2.108		2.914	1.054
3.44235	206.541	2.108	1.86	0.01	9837.8	2559.6	14900.1	4.8	-9.54	-14.48	0.0532	1.102	0.3635	0.5774	14.9	4.909	4985.7	7278.2	22.7851	3.968	3.96	1.852	2.563	2.555	2.108		2.914	1.054
3.47568	208.541	2.078	1.86	0.01	9839.8	2558.1	14899.1	4.7	-9.54	-14.49	0.0534	1.1023	0.3633	0.5776	14.8	4.84	4985.3	7281.7	22.7852	3.939	3.93	1.852	2.553	2.545	2.079		2.8995	1.039
3.50902	210.541	2.093	1.85	0	9836.4	2557.6	14894.8	4.8	-9.55	-14.5	0.0522	1.1019	0.3632	0.5768	15.1	4.874	4983.9	7278.9	22.7852	3.94	3.935	1.842	2.544	2.54	2.09		2.895	1.0465
3.54235	212.541	2.078	1.85	0.01	9838.4	2557.6	14896.8	4.7	-9.55	-14.5	0.0546	1.1021	0.3632	0.5781	14.8	4.84	4984.5	7280.9	22.7852	3.925	3.912	1.834	2.539	2.527	2.075		2.8875	1.039
3.57568	214.541	2.093	1.84	0	9838.4	2558.1	14897.8	4.8	-9.56	-14.51	0.0545	1.1021	0.3633	0.578	14.6	4.873	4984.9	7280.4	22.7852	3.935	3.931	1.838	2.54	2.535	2.095		2.8875	1.0465
3.60902	216.541	2.108	1.84	0.01	9837.1	2557.6	14895.4	4.8	-9.55	-14.51	0.0547	1.102	0.3632	0.5781	14.6	4.908	4984.1	7279.5	22.7852	3.95	3.942	1.833	2.545	2.536	2.11		2.895	1.054
3.64233	218.54	2.093	1.85	0.01	9837.8	2557.6	14896.1	4.8	-9.55	-14.51	0.0542	1.102	0.3632	0.5779	15	4.874	4984.3	7280.2	22.7852	3.944	3.936	1.843	2.549	2.54	2.094		2.897	1.0465
3.67567	220.54	2.078	1.85	0.01	9837.1	2558.1	14896.4	4.7	-9.55	-14.5	0.055	1.102	0.3633	0.5782	14.8	4.84	4984.4	7279	22.7852	3.925	3.912	1.834	2.539	2.527	2.075		2.8875	1.039
3.709	222.54	2.108	1.85	0.01	9838.4	2558.1	14897.8	4.8	-9.54	-14.5	0.0542	1.1021	0.3633	0.5779	15.1	4.908	4984.9	7280.4	22.7852	3.955	3.942	1.834	2.549	2.537	2.105		2.9025	1.054
3.74233	224.54	2.078	1.84	0.02	9837.8	2558.1	14897.1	4.7	-9.55	-14.5	0.0534	1.102	0.3633	0.5775	15.1	4.839	4984.6	7279.7	22.7852	3.92	3.903	1.825	2.535	2.518	2.08		2.88	1.039
3.77567	226.54	2.093	1.85	0.02	9837.8	2559.1	14899.1	4.8	-9.55	-14.49	0.0539	1.102	0.3634	0.5777	15	4.874	4985.3	7278.7	22.7851	3.94	3.923	1.83	2.544	2.527	2.09		2.895	1.0465
3.809	228.54	2.093	1.85	0.02	9839.8	2558.1	14899.1	4.8	-9.54	-14.49	0.0543	1.1023	0.3633	0.578	15.1	4.874	4985.3	7281.7	22.7852	3.944	3.928	1.834	2.549	2.532	2.094		2.897	1.0465
3.84233	230.54	2.078	1.86	0.02	9838.4	2559.6	14900.8	4.7	-9.54	-14.48	0.0534	1.1021	0.3635	0.5775	15.1	4.84	4985.9	7278.8	22.7851	3.934	3.913	1.835	2.548	2.528	2.074		2.897	1.039
3.87565	232.539	2.063	1.86	0.02	9839.8	2559.6	14902.1	4.7	-9.54	-14.48	0.055	1.1023	0.3635	0.5784	14.8	4.806	4986.3	7280.2	22.7851	3.919	3.898	1.835	2.543	2.523	2.059		2.8895	1.0315
3.90898	234.539	2.108	1.85	0.02	9839.1	2560.6	14903.5	4.8	-9.55	-14.47	0.0567	1.1022	0.3636	0.5792	14.7	4.908	4986.8	7278.5	22.7851	3.959	3.938	1.83	2.554	2.533	2.109		2.9045	1.054
3.94232	236.539	2.093	1.85	0.03	9837.8	2561.6	14904.1	4.8	-9.54	-14.47	0.0534	1.102	0.3638	0.5775	15.3	4.874	4987	7276.1	22.785	3.944	3.919	1.826	2.549	2.524	2.094		2.897	1.0465
3.97565	238.539	2.078	1.85	0.03	9839.1	2562.7	14907.5	4.7	-9.55	-14.46	0.0539	1.1022	0.3639	0.5778	14.9	4.84	4988.2	7276.5	22.785	3.929	3.904	1.826	2.544	2.519	2.079		2.8895	1.039
4.00898	240.539	2.063	1.85	0.03	9838.4	2562.7	14906.9	4.7	-9.55	-14.46	0.0542	1.1021	0.3639	0.5779	15	4.806	4987.9	7275.8	22.785	3.914	3.889	1.826	2.539	2.514	2.064		2.882	1.0315
4.04232	242.539	2.063	1.85	0.03	9837.8	2564.2	14909.2	4.7	-9.55	-14.47	0.054	1.102	0.3641	0.5778	15	4.806	4988.7	7273.6	22.7849	3.91	3.885	1.821	2.534	2.509	2.06		2.88	1.0315
4.07563	244.538	2.063	1.84	0.03	9838.4	2563.7	14908.9	4.7	-9.55	-14.47	0.0526	1.1021	0.3641	0.5771	15.3	4.805	4988.6	7274.8	22.7849	3.905	3.88	1.817	2.53	2.505	2.065		2.8725	1.0315
4.10897	246.538	2.063	1.84	0.03	9838.4	2564.7	14910.9	4.7	-9.56	-14.46	0.0556	1.1021	0.3642	0.5786	14.6	4.805	4989.3	7273.7	22.7849	3.905	3.88	1.817	2.53	2.505	2.065		2.8725	1.0315
4.1423	248.538	2.078	1.85	0.03	9837.8	2564.7	14910.2	4.7	-9.55	-14.47	0.0539	1.102	0.3642	0.5777	15.4	4.84	4989.1	7273.1	22.7849	3.925	3.895	1.817	2.539	2.51	2.075		2.8875	1.039
4.17563	250.538	2.108	1.84	0.03	9837.1	2564.2	14908.5	4.8	-9.55	-14.47	0.0542	1.102	0.3641	0.5779	15.3	4.908	4988.5	7272.9	22.7849	3.95	3.917	1.808	2.545	2.511	2.11		2.895	1.054
4.20897	252.538	2.063	1.84	0.03	9839.1	2564.2	14910.6	4.7	-9.55	-14.47	0.0545	1.1022	0.3641	0.5781	15.4	4.805	4989.2	7274.9	22.7849	3.905	3.876	1.813	2.53	2.5	2.065		2.8725	1.0315
4.2423	254.538	2.063	1.84	0.03	9837.8	2563.7	14908.2	4.7	-9.56	-14.48	0.0567	1.102	0.3641	0.5791	15.3	4.805	4988.4	7274.1	22.7849	3.9	3.867	1.804	2.525	2.492	2.06		2.87	1.0315
4.27563	256.538	2.078	1.84	0.04	9836.4	2564.7	14908.9	4.7	-9.55	-14.48	0.0518	1.1019	0.3642	0.5766	15.5	4.839	4988.6	7271.7	22.7849	3.92	3.878	1.8	2.535	2.493	2.08		2.88	1.039
4.30895	258.537	2.048	1.84	0.04	9838.4	2564.2	14909.9	4.7	-9.55	-14.48	0.0553	1.1021	0.3641	0.5784	15	4.771	4988.9	7274.2	22.7849	3.885	3.844	1.796	2.52	2.478	2.045		2.8625	1.024
4.34228	260.537	2.048	1.84	0.05	9837.1	2565.2	14910.6	4.7	-9.55	-14.49	0.0535	1.102	0.3643	0.5775	14.8	4.771	4989.2	7271.9	22.7849	3.89	3.844	1.796	2.525	2.479	2.05		2.865	1.024
4.37562	262.537	2.048	1.83	0.05	9838.4	2564.7	14910.9	4.7	-9.54	-14.49	0.0548	1.1021	0.3642	0.5782	14.9	4.771	4989.3	7273.7	22.7849	3.881	3.831	1.783	2.515	2.465	2.051		2.8555	1.024
4.40895	264.537	2.033	1.83	0.05	9837.8	2564.7	14910.2	4.6	-9.54	-14.49	0.0529	1.102	0.3642	0.5772	14.6	4.737	4989.1	7273.1	22.7849	3.866	3.812	1.778	2.51	2.456	2.036		2.848	1.0165
4.44228	266.537	2.048	1.83	0.06	9837.1	2564.2	14908.5	4.7	-9.54	-14.5	0.0549	1.102	0.3641	0.5782	14.8	4.77	4988.5	7272.9	22.7849	3.876	3.818	1.77	2.511	2.452	2.046		2.853	1.024
4.47562	268.537	2.003	1.83	0.05	9836.4	2564.7	14908.9	4.6	-9.54	-14.5	0.0532	1.1019	0.3642	0.5773	14.7	4.668	4988.6	7271.7	22.7849	3.831	3.777	1.774	2.496	2.442	2.001		2.8305	1.0015
4.50895	270.537	2.033	1.82	0.05	9837.8	2564.2	14909.2	4.6	-9.54	-14.51	0.054	1.102	0.3641	0.5778	14.5	4.736	4988.7	7273.6	22.7849	3.857	3.802	1.769	2.501	2.447	2.037		2.8385	1.0165
4.54227	272.536	1.988	1.82	0.06	9837.1	2564.2	14908.5	4.5	-9.54	-14.51	0.0539	1.102	0.3641	0.5777	14.2	4.634	4988.5	7272.9	22.7849	3.812	3.753	1.765	2.486	2.428	1.992		2.816	0.994
4.5756	274.536	1.974	1.82	0.06	9838.4	2563.7	14908.9	4.5	-9.54	-14.52	0.0561	1.1021	0.3641	0.5789	14.4	4.6	4988.6	7274.8	22.7849	3.792	3.73	1.756	2.477	2.414	1.972		2.806	0.987
4.60893	276.536	1.959	1.82	0.07	9837.8	2563.2	14907.2	4.5	-9.54	-14.53	0.0541	1.102	0.364	0.5778	14.4	4.566	4988	7274.6	22.785	3.777	3.711	1.752	2.472	2.405	1.957		2.7985	0.9795
4.64227	278.536	1.959	1.81	0.07	9837.8	2563.2	14907.2	4.5	-9.54	-14.53	0.0547	1.102	0.364	0.5781	14.1	4.565	4988	7274.6	22.785	3.773	3.706	1.747	2.467	2.4	1.963		2.7915	0.9795
4.6756	280.536	1.959	1.81	0.07	9837.8	2563.2	14907.2	4.5	-9.54	-14.54	0.0533	1.102	0.364	0.5774	14	4.565	4988	7274.6	22.785	3.768	3.697	1.739	2.462	2.391	1.958		2.789	0.9795
4.70893	282.536	1.944	1.8	0.07	9836.4	2562.7	14904.9	4.4	-9.54	-14.55	0.0551	1.1019	0.3639	0.5782	13.8	4.531	4987.3	7273.8	22.785	3.748	3.682	1.738	2.453	2.386	1.948		2.774	0.972
4.74225	284.535	1.929	1.8	0.07	9837.1	2568.3	14916.6	4.4	-9.54	-14.56	0.0528	1.102	0.3647	0.5771	13.7	4.496	4991.2	7268.8	22.7847	3.729	3.658	1.729	2.443	2.372	1.929		2.7645	0.9645
4.77558	286.535	1.899	1.8	0.07	9839.1	2578	14937.8	4.3	-9.55	-14.57	0.0547	1.1022	0.3661	0.5782	13.6	4.428	4998.4	7261.1	22.7843	3.699	3.628	1.729	2.433	2.362	1.899		2.7495	0.9495
4.80892	288.535	1.899	1.78	0.06	9836.4	2583.6	14946.2	4.3	-9.54	-14.61	0.052	1.1019	0.3669	0.5767	13.3	4.427	5001.2	7252.8	22.784	3.681	3.618	1.719	2.415	2.352	1.901		2.7305	0.9495
4.84225	290.535	1.914	1.77	0.07	9837.8	2588.2	14956.6	4.4	-9.54	-14.66	0.0553	1.102	0.3675	0.5784	13.3	4.46	5004.7	7249.6	22.7838	3.682	3.611	1.697	2.406	2.335	1.912		2.726	0.957
4.87558	292.535	1.899	1.75	0.07	9838.4	2602	14984.5	4.3	-9.55	-14.74	0.054	1.1021	0.3695	0.5778	12.5	4.425	5014.1	7236.5	22.7832	3.648	3.577	1.678	2.382	2.311	1.898		2.699	0.9495
4.90892	294.535	1.869	1.72	0.07	9838.4	2612.7	15005.7	4.3	-9.54	-14.86	0.0553	1.1021	0.371	0.5784	12.5	4.355	5021.3	7225.7	22.7827	3.586	3.515	1.646	2.34	2.269	1.866		2.653	0.9345
4.94225	296.535	1.884	1.68	0.07	9838.4	2631.1	15042	4.3	-9.55	-15.02	0.0563	1.1021	0.3736	0.579	12.1	4.387	5033.5	7207.4	22.7819	3.559	3.488	1.604	2.303	2.232	1.879		2.6195	0.942
4.97557	298.534	1.899	1.62	0.07	9839.1	2655.1	15090.1	4.3	-9.55	-15.25	0.0555	1.1022	0.377	0.5786	11	4.418	5049.8	7184	22.7808	3.523	3.453	1.553	2.257	2.186	1.903		2.5715	0.9495
5.0089	300.534	1.899	1.55	0.07	9837.1	2670.4	15118.3	4.3	-9.55	-15.55	0.0541	1.102	0.3792	0.5778	10.6	4.414	5059.3	7166.7	22.7801	3.449	3.379	1.479	2.183	2.112	1.899		2.4995	0.9495
5.04223	302.534	1.884	1.47	0.07	9839.1	2693.9	15166.7	4.3	-9.55	-15.93	0.0539	1.1022	0.3826	0.5778	9.2	4.375	5075.6	7145.2	22.779	3.351	3.28	1.396	2.095	2.024	1.881		2.4105	0.942
5.07557	304.534	1.914	1.36	0.07	9838.4	2715.8	15209.4	4.4	-9.56	-16.39	0.0532	1.1021	0.3857	0.5774	8.1	4.437	5090	7122.6	22.778	3.27	3.204	1.289	1.994	1.927	1.91		2.315	0.957
5.1089	306.534	1.929	1.23	0.06	9837.8	2734.7	15246	4.4	-9.57	-16.97	0.0534	1.102	0.3884	0.5775	6.9	4.464	5102.4	7103	22.7771	3.16	3.098	1.168	1.874	1.812	1.93		2.195	0.9645
5.14223	308.534	1.899	1.1	0.06	9839.1	2689.8	15158.6	4.3	-9.58	-17.6	0.0536	1.1022	0.382	0.5776	5.1	4.388	5072.9	7149.3	22.7792	2.996	2.938	1.038	1.73	1.671	1.896		2.048	0.9495
5.17557	310.534	1.884	0.99	0.06	9839.1	2605	14991.2	4.3	-9.58	-18.21	0.0546	1.1022	0.3699	0.5781	3.6	4.348	5016.4	7234.1	22.783	2.87	2.807	0.923	1.614	1.551	1.88		1.93	0.942
5.20888	312.533	1.854	0.89	0.06	9839.1	2514.7	14812.7	4.2	-9.58	-18.73	0.0545	1.1022	0.3571	0.5781	2.9	4.274	4956.2	7324.5	22.7872	2.742	2.684	0.83	1.506	1.448	1.852		1.816	0.927
5.24222	314.533	1.839	0.83	0.06	9838.4	2443.7	14671.8	4.2	-9.58	-19.13	0.0542	1.1021	0.347	0.5779	1.9	4.237	4908.6	7394.8	22.7904	2.667	2.604	0.766	1.441	1.379	1.837		1.7485	0.9195
5.27555	316.533	1.779	0.79	0.07	9837.1	2405.4	14594.8	4.1	-9.59	-19.41	0.0526	1.102	0.3416	0.577	1.1	4.098	4882.6	7431.7	22.7922	2.565	2.499	0.72	1.38	1.313	1.775		1.6775	0.8895
5.30888	318.533	1.779	0.76	0.06	9837.1	2397.2	14578.7	4.1	-9.59	-19.59	0.0556	1.102	0.3404	0.5785	1.5	4.097	4877.2	7439.9	22.7925	2.538	2.475	0.696	1.352	1.289	1.778		1.649	0.8895
5.34222	320.533	1.734	0.75	0.05	9837.1	2416.1	14616	4	-9.58	-19.69	0.0535	1.102	0.3431	0.5775	1.2	3.994	4889.8	7421	22.7917	2.483	2.429	0.695	1.328	1.273	1.733		1.6165	0.867
5.37555	322.533	1.734	0.75	0.06	9837.1	2447.8	14678.5	4	-9.59	-19.75	0.054	1.102	0.3476	0.5777	1.2	3.994	4910.9	7389.3	22.7902	2.479	2.421	0.687	1.323	1.265	1.729		1.6145	0.867
5.40887	324.532	1.719	0.74	0.05	9837.8	2478.9	14740.8	3.9	-9.59	-19.8	0.0526	1.102	0.352	0.5771	1	3.959	4931.9	7358.9	22.7888	2.455	2.401	0.682	1.309	1.255	1.715		1.5975	0.8595
5.4422	326.532	1.719	0.73	0.05	9835.8	2505.5	14791.2	3.9	-9.58	-19.83	0.0542	1.1018	0.3558	0.5778	1.4	3.959	4948.9	7330.3	22.7876	2.446	2.392	0.672	1.3	1.245	1.716		1.588	0.8595
5.47553	328.532	1.659	0.73	0.06	9837.8	2527.4	14836.6	3.8	-9.6	-19.88	0.0535	1.102	0.3589	0.5775	1.3	3.822	4964.2	7310.3	22.7866	2.386	2.328	0.668	1.28	1.221	1.656		1.558	0.8295
5.50887	330.532	1.66	0.71	0.05	9834.4	2547.9	14873.6	3.8	-9.6	-19.93	0.0539	1.1017	0.3618	0.5775	1.1	3.821	4976.7	7286.5	22.7857	2.368	2.318	0.658	1.261	1.211	1.658		1.539	0.83
5.5422	332.532	1.674	0.7	0.05	9837.8	2560.1	14901.1	3.8	-9.6	-19.99	0.053	1.102	0.3636	0.5773	0.8	3.855	4986	7277.7	22.7851	2.378	2.324	0.649	1.262	1.207	1.678		1.539	0.837
5.57553	334.532	1.615	0.7	0.05	9837.8	2563.7	14908.2	3.7	-9.6	-20.06	0.0545	1.102	0.3641	0.578	0.7	3.719	4988.4	7274.1	22.7849	2.313	2.263	0.649	1.237	1.187	1.613		1.5065	0.8075
5.60887	336.532	1.6	0.69	0.05	9839.1	2563.7	14909.5	3.6	-9.59	-20.12	0.0544	1.1022	0.3641	0.578	0.8	3.684	4988.8	7275.4	22.7849	2.289	2.235	0.635	1.223	1.169	1.599		1.4895	0.8
5.64218	338.531	1.6	0.68	0.05	9836.4	2563.2	14905.9	3.6	-9.6	-20.19	0.0549	1.1019	0.364	0.5781	0.6	3.683	4987.6	7273.3	22.785	2.275	2.225	0.626	1.209	1.159	1.595		1.4775	0.8
5.67552	340.531	1.585	0.67	0.05	9839.1	2560.6	14903.5	3.6	-9.6	-20.27	0.0528	1.1022	0.3636	0.5772	0.3	3.649	4986.8	7278.5	22.7851	2.251	2.201	0.616	1.195	1.145	1.581		1.4605	0.7925
5.70885	342.531	1.54	0.65	0.05	9837.1	2554.5	14889.4	3.5	-9.6	-20.33	0.0542	1.102	0.3628	0.5779	0.4	3.546	4982	7282.6	22.7854	2.192	2.147	0.607	1.166	1.12	1.542		1.421	0.77
5.74218	344.531	1.54	0.65	0.05	9837.8	2549.9	14880.9	3.5	-9.61	-20.39	0.0529	1.102	0.3621	0.5772	0.3	3.546	4979.2	7287.9	22.7856	2.192	2.147	0.607	1.166	1.12	1.542		1.421	0.77
5.77552	346.531	1.525	0.65	0.05	9838.4	2545.3	14872.6	3.5	-9.6	-20.43	0.0553	1.1021	0.3615	0.5785	0	3.511	4976.4	7293.1	22.7858	2.173	2.127	0.602	1.156	1.11	1.523		1.4115	0.7625
5.80885	348.531	1.51	0.64	0.04	9839.1	2541.7	14866.2	3.4	-9.6	-20.45	0.0545	1.1022	0.361	0.5781	0.3	3.477	4974.2	7297.4	22.7859	2.149	2.107	0.597	1.142	1.1	1.509		1.3945	0.755
5.84217	350.53	1.495	0.64	0.05	9837.1	2541.2	14863.2	3.4	-9.59	-20.46	0.0551	1.102	0.3609	0.5783	0.1	3.443	4973.2	7295.9	22.786	2.134	2.088	0.593	1.137	1.091	1.494		1.387	0.7475
5.8755	352.53	1.465	0.64	0.05	9838.4	2541.7	14865.5	3.3	-9.6	-20.47	0.0543	1.1021	0.361	0.578	0.4	3.375	4974	7296.7	22.7859	2.108	2.058	0.593	1.132	1.082	1.468		1.374	0.7325
5.90883	354.53	1.45	0.64	0.05	9837.8	2542.8	14866.8	3.3	-9.6	-20.47	0.0545	1.102	0.3611	0.578	0.3	3.341	4974.4	7295	22.7859	2.093	2.048	0.597	1.127	1.081	1.453		1.3665	0.725
5.94217	356.53	1.435	0.64	0.05	9837.1	2546.3	14873.3	3.3	-9.59	-20.47	0.0537	1.102	0.3616	0.5776	0.3	3.307	4976.6	7290.8	22.7857	2.079	2.033	0.597	1.122	1.076	1.439		1.3595	0.7175
5.9755	358.53	1.495	0.65	0.05	9836.4	2552.5	14884.7	3.4	-9.59	-20.46	0.0546	1.1019	0.3625	0.578	0.3	3.443	4980.4	7284	22.7854	2.143	2.097	0.602	1.146	1.1	1.493		1.3965	0.7475
6.00883	360.53	1.435	0.65	0.04	9838.4	2558.1	14897.8	3.3	-9.59	-20.45	0.0536	1.1021	0.3633	0.5776	0.4	3.307	4984.9	7280.4	22.7852	2.083	2.041	0.606	1.126	1.085	1.433		1.3665	0.7175
6.04217	362.53	1.405	0.65	0.05	9836.4	2564.7	14908.9	3.2	-9.59	-20.45	0.0542	1.1019	0.3642	0.5778	0.2	3.239	4988.6	7271.7	22.7849	2.058	2.012	0.607	1.121	1.075	1.408		1.354	0.7025
6.07548	364.529	1.405	0.65	0.05	9837.8	2568.8	14918.3	3.2	-9.59	-20.45	0.0532	1.102	0.3648	0.5773	0.1	3.239	4991.8	7269	22.7847	2.058	2.008	0.602	1.121	1.071	1.408		1.354	0.7025
6.10882	366.529	1.376	0.65	0.05	9839.1	2573.4	14928.7	3.1	-9.59	-20.46	0.0534	1.1022	0.3654	0.5775	0.2	3.171	4995.3	7265.7	22.7845	2.028	1.982	0.607	1.111	1.065	1.378		1.339	0.688
6.14215	368.529	1.361	0.64	0.04	9836.4	2577	14933.1	3.1	-9.59	-20.47	0.0546	1.1019	0.366	0.578	0.1	3.136	4996.8	7259.5	22.7843	2.004	1.962	0.602	1.097	1.055	1.364		1.322	0.6805
6.17548	370.529	1.361	0.64	0.05	9835.8	2579	14936.5	3.1	-9.59	-20.49	0.0539	1.1018	0.3662	0.5776	0	3.136	4997.9	7256.7	22.7842	2.004	1.958	0.597	1.097	1.051	1.364		1.322	0.6805
6.20882	372.529	1.361	0.63	0.05	9839.1	2578	14937.8	3.1	-9.59	-20.53	0.0537	1.1022	0.3661	0.5777	-0.1	3.136	4998.4	7261.1	22.7843	1.995	1.94	0.58	1.088	1.033	1.365		1.3125	0.6805
6.24215	374.529	1.346	0.63	0.05	9837.8	2578	14936.4	3.1	-9.59	-20.56	0.0551	1.102	0.3661	0.5783	-0.2	3.102	4997.9	7259.8	22.7843	1.98	1.925	0.58	1.083	1.028	1.35		1.305	0.673
6.27547	376.528	1.346	0.62	0.06	9837.8	2573.9	14928.4	3.1	-9.59	-20.61	0.0535	1.102	0.3655	0.5775	-0.3	3.101	4995.2	7263.9	22.7845	1.97	1.912	0.566	1.073	1.015	1.35		1.295	0.673
6.3088	378.528	1.346	0.62	0.06	9836.4	2567.8	14915	3.1	-9.59	-20.65	0.056	1.1019	0.3646	0.5787	-0.2	3.101	4990.7	7268.7	22.7847	1.966	1.907	0.562	1.069	1.01	1.346		1.293	0.673
6.34213	380.528	1.301	0.62	0.06	9838.4	2560.6	14902.8	3	-9.59	-20.68	0.0542	1.1021	0.3636	0.5779	-0.4	2.999	4986.6	7277.8	22.7851	1.921	1.862	0.562	1.054	0.995	1.301		1.2705	0.6505
6.37547	382.528	1.316	0.62	0.06	9837.1	2555	14890.4	3	-9.59	-20.71	0.054	1.102	0.3628	0.5777	-0.4	3.033	4982.4	7282.1	22.7853	1.931	1.873	0.557	1.054	0.996	1.311		1.2755	0.658
6.4088	384.528	1.301	0.61	0.06	9837.8	2549.9	14880.9	3	-9.59	-20.73	0.0539	1.102	0.3621	0.5777	-0.3	2.998	4979.2	7287.9	22.7856	1.907	1.849	0.548	1.04	0.981	1.297		1.2585	0.6505
6.44213	386.528	1.316	0.62	0.06	9837.1	2547.9	14876.3	3	-9.59	-20.75	0.0544	1.102	0.3618	0.5779	-0.3	3.033	4977.6	7289.2	22.7857	1.931	1.869	0.553	1.054	0.991	1.311		1.2755	0.658
6.47547	388.528	1.271	0.61	0.06	9838.4	2546.8	14875.6	2.9	-9.59	-20.75	0.0555	1.1021	0.3617	0.5786	-0.4	2.93	4977.4	7291.6	22.7857	1.882	1.823	0.552	1.034	0.976	1.272		1.246	0.6355
6.50878	390.527	1.256	0.61	0.06	9836.4	2547.3	14874.6	2.9	-9.6	-20.75	0.0543	1.1019	0.3617	0.5778	-0.2	2.896	4977	7289.1	22.7857	1.867	1.804	0.548	1.029	0.967	1.257		1.2385	0.628
6.54212	392.527	1.286	0.61	0.07	9838.4	2546.8	14875.6	2.9	-9.59	-20.74	0.0545	1.1021	0.3617	0.5781	-0.3	2.964	4977.4	7291.6	22.7857	1.897	1.83	0.544	1.039	0.973	1.287		1.2535	0.643
6.57545	394.527	1.271	0.62	0.07	9837.8	2550.4	14882	2.9	-9.59	-20.73	0.0556	1.102	0.3622	0.5786	-0.6	2.93	4979.5	7287.4	22.7855	1.886	1.82	0.549	1.039	0.972	1.266		1.253	0.6355
6.60878	396.527	1.211	0.62	0.07	9836.4	2553	14885.7	2.8	-9.6	-20.72	0.055	1.1019	0.3625	0.5782	-0.4	2.794	4980.8	7283.5	22.7854	1.826	1.76	0.549	1.019	0.952	1.206		1.223	0.6055
6.64212	398.527	1.226	0.62	0.07	9837.8	2558.1	14897.1	2.8	-9.59	-20.7	0.0553	1.102	0.3633	0.5784	-0.6	2.828	4984.6	7279.7	22.7852	1.841	1.775	0.549	1.024	0.957	1.221		1.2305	0.613
6.67545	400.527	1.226	0.62	0.07	9839.8	2561.1	14905.1	2.8	-9.6	-20.7	0.0537	1.1023	0.3637	0.5777	-0.3	2.828	4987.4	7278.7	22.7851	1.841	1.771	0.545	1.024	0.953	1.221		1.2305	0.613
6.70878	402.527	1.211	0.62	0.07	9838.4	2564.2	14909.9	2.8	-9.6	-20.7	0.0553	1.1021	0.3641	0.5784	-0.3	2.794	4988.9	7274.2	22.7849	1.827	1.76	0.549	1.019	0.952	1.207		1.2235	0.6055
6.7421	404.526	1.166	0.62	0.08	9835.1	2566.8	14911.6	2.7	-9.6	-20.7	0.0526	1.1017	0.3645	0.5769	-0.4	2.692	4989.5	7268.3	22.7848	1.782	1.707	0.54	1.004	0.929	1.162		1.201	0.583
6.77543	406.526	1.196	0.62	0.08	9837.8	2568.3	14917.3	2.7	-9.61	-20.71	0.0546	1.102	0.3647	0.5781	-0.7	2.76	4991.4	7269.5	22.7847	1.812	1.737	0.54	1.014	0.939	1.192		1.216	0.598
6.80877	408.526	1.151	0.61	0.08	9837.8	2568.3	14917.3	2.6	-9.61	-20.7	0.0534	1.102	0.3647	0.5775	-0.4	2.658	4991.4	7269.5	22.7847	1.762	1.687	0.536	0.995	0.92	1.152		1.186	0.5755
6.8421	410.526	1.166	0.61	0.08	9837.8	2570.3	14921.3	2.7	-9.61	-20.71	0.0535	1.102	0.365	0.5775	-0.7	2.692	4992.8	7267.4	22.7846	1.777	1.702	0.536	1	0.925	1.167		1.1935	0.583
6.87543	412.526	1.166	0.61	0.08	9838.4	2569.8	14921	2.7	-9.61	-20.72	0.0557	1.1021	0.3649	0.5787	-0.7	2.692	4992.7	7268.6	22.7847	1.777	1.698	0.532	1	0.92	1.167		1.1935	0.583
6.90877	414.526	1.151	0.61	0.08	9838.4	2569.8	14921	2.6	-9.6	-20.72	0.0541	1.1021	0.3649	0.5779	-0.7	2.657	4992.7	7268.6	22.7847	1.757	1.674	0.523	0.99	0.907	1.147		1.1835	0.5755
6.94208	416.525	1.121	0.61	0.09	9837.1	2569.8	14919.6	2.6	-9.6	-20.73	0.0539	1.102	0.3649	0.5777	-1	2.59	4992.2	7267.3	22.7847	1.732	1.64	0.519	0.985	0.893	1.122		1.171	0.5605
6.97542	418.525	1.151	0.61	0.08	9837.1	2568.8	14917.6	2.6	-9.6	-20.74	0.0546	1.102	0.3648	0.578	-0.7	2.658	4991.6	7268.3	22.7847	1.762	1.679	0.527	0.995	0.911	1.152		1.186	0.5755
7.00875	420.525	1.091	0.61	0.08	9837.8	2568.3	14917.3	2.5	-9.6	-20.75	0.0545	1.102	0.3647	0.578	-0.8	2.521	4991.4	7269.5	22.7847	1.698	1.614	0.523	0.97	0.887	1.088		1.154	0.5455
7.04208	422.525	1.062	0.61	0.08	9837.1	2566.2	14912.6	2.4	-9.6	-20.76	0.0543	1.102	0.3644	0.5779	-0.8	2.453	4989.9	7270.9	22.7848	1.672	1.589	0.527	0.965	0.881	1.062		1.141	0.531
7.07542	424.525	1.106	0.61	0.09	9837.8	2563.7	14908.2	2.5	-9.6	-20.78	0.0546	1.102	0.3641	0.5781	-1.1	2.555	4988.4	7274.1	22.7849	1.717	1.63	0.523	0.98	0.892	1.107		1.1635	0.553
7.10875	426.525	1.076	0.61	0.09	9837.8	2560.6	14902.1	2.5	-9.6	-20.78	0.0533	1.102	0.3636	0.5774	-1	2.487	4986.3	7277.2	22.7851	1.687	1.596	0.519	0.97	0.878	1.077		1.1485	0.538
7.14208	428.525	1.062	0.6	0.1	9836.4	2560.1	14899.8	2.4	-9.6	-20.78	0.0551	1.1019	0.3636	0.5782	-1.1	2.453	4985.6	7276.3	22.7851	1.663	1.567	0.506	0.955	0.86	1.063		1.1315	0.531
7.1754	430.524	1.062	0.6	0.1	9835.1	2558.1	14894.4	2.4	-9.59	-20.79	0.0536	1.1017	0.3633	0.5774	-1	2.453	4983.7	7277	22.7852	1.663	1.563	0.502	0.955	0.855	1.063		1.1315	0.531
7.20873	432.524	1.062	0.61	0.1	9839.1	2556.5	14895.4	2.4	-9.6	-20.79	0.055	1.1022	0.3631	0.5784	-1	2.453	4984.1	7282.6	22.7853	1.668	1.572	0.51	0.96	0.864	1.058		1.139	0.531
7.24207	434.524	1.032	0.6	0.1	9837.1	2556.5	14893.4	2.4	-9.59	-20.79	0.0539	1.102	0.3631	0.5777	-1.1	2.385	4983.4	7280.6	22.7853	1.633	1.533	0.502	0.945	0.845	1.033		1.1165	0.516
7.2754	436.524	1.002	0.61	0.1	9837.8	2557.1	14895.1	2.3	-9.6	-20.79	0.0545	1.102	0.3631	0.578	-1.3	2.317	4984	7280.7	22.7852	1.608	1.512	0.51	0.94	0.844	0.998		1.109	0.501
7.30873	438.524	1.032	0.61	0.09	9837.1	2557.1	14894.4	2.4	-9.6	-20.78	0.0529	1.102	0.3631	0.5772	-1	2.385	4983.7	7280.1	22.7852	1.638	1.546	0.514	0.95	0.858	1.028		1.124	0.516
7.34207	440.524	1.017	0.61	0.1	9837.8	2558.1	14897.1	2.3	-9.59	-20.77	0.0537	1.102	0.3633	0.5776	-1.1	2.351	4984.6	7279.7	22.7852	1.628	1.532	0.515	0.95	0.854	1.018		1.119	0.5085
7.37538	442.523	1.017	0.61	0.09	9838.4	2558.6	14898.8	2.3	-9.6	-20.77	0.0541	1.1021	0.3633	0.5779	-1.1	2.351	4985.2	7279.9	22.7852	1.623	1.531	0.514	0.945	0.853	1.013		1.1165	0.5085
7.40872	444.523	0.972	0.61	0.08	9836.4	2560.6	14900.8	2.2	-9.6	-20.76	0.0541	1.1019	0.3636	0.5777	-1	2.249	4985.9	7275.8	22.7851	1.583	1.499	0.527	0.935	0.851	0.973		1.0965	0.486
7.44205	446.523	0.987	0.62	0.09	9837.1	2563.2	14906.5	2.2	-9.59	-20.76	0.0543	1.102	0.364	0.5779	-1.5	2.283	4987.8	7273.9	22.785	1.602	1.515	0.528	0.944	0.857	0.982		1.111	0.4935
7.47538	448.523	0.972	0.62	0.09	9837.1	2564.7	14909.5	2.2	-9.6	-20.75	0.0537	1.102	0.3642	0.5776	-1.4	2.249	4988.8	7272.4	22.7849	1.592	1.5	0.528	0.944	0.852	0.972		1.106	0.486
7.50872	450.523	0.987	0.62	0.08	9837.8	2564.7	14910.2	2.2	-9.59	-20.75	0.0542	1.102	0.3642	0.5779	-1.3	2.283	4989.1	7273.1	22.7849	1.602	1.519	0.532	0.944	0.861	0.982		1.111	0.4935
7.54205	452.523	0.957	0.62	0.09	9837.1	2565.7	14911.6	2.2	-9.59	-20.75	0.0545	1.102	0.3644	0.578	-1	2.215	4989.5	7271.4	22.7848	1.577	1.489	0.533	0.939	0.852	0.957		1.0985	0.4785
7.57538	454.523	0.957	0.62	0.09	9838.4	2565.7	14912.9	2.2	-9.59	-20.75	0.0542	1.1021	0.3644	0.5779	-1.4	2.215	4990	7272.7	22.7848	1.577	1.485	0.528	0.939	0.847	0.957		1.0985	0.4785
7.6087	456.522	0.957	0.62	0.09	9837.1	2565.7	14911.6	2.2	-9.59	-20.75	0.056	1.102	0.3644	0.5788	-1.3	2.215	4989.5	7271.4	22.7848	1.572	1.485	0.528	0.934	0.847	0.952		1.096	0.4785
7.64203	458.522	0.942	0.61	0.08	9837.8	2565.7	14912.2	2.1	-9.59	-20.76	0.0535	1.102	0.3644	0.5775	-1.7	2.181	4989.7	7272	22.7848	1.553	1.469	0.527	0.925	0.841	0.943		1.0815	0.471
7.67537	460.522	0.912	0.61	0.09	9838.4	2565.2	14911.9	2.1	-9.6	-20.76	0.0537	1.1021	0.3643	0.5777	-1.5	2.113	4989.6	7273.2	22.7849	1.523	1.435	0.523	0.915	0.827	0.913		1.0665	0.456
7.7087	462.522	0.912	0.61	0.08	9837.8	2565.2	14911.2	2.1	-9.6	-20.76	0.0534	1.102	0.3643	0.5775	-1.3	2.112	4989.4	7272.6	22.7849	1.518	1.435	0.523	0.91	0.827	0.908		1.064	0.456
7.74203	464.522	0.942	0.61	0.08	9837.8	2565.7	14912.2	2.1	-9.6	-20.77	0.0547	1.102	0.3644	0.5781	-1.4	2.18	4989.7	7272	22.7848	1.548	1.465	0.523	0.92	0.837	0.938		1.079	0.471
7.77537	466.522	0.912	0.61	0.08	9837.8	2564.7	14910.2	2.1	-9.6	-20.77	0.0538	1.102	0.3642	0.5777	-1.2	2.113	4989.1	7273.1	22.7849	1.523	1.439	0.527	0.915	0.831	0.913		1.0665	0.456
7.8087	468.522	0.912	0.61	0.08	9837.8	2563.7	14908.2	2.1	-9.6	-20.77	0.0546	1.102	0.3641	0.5781	-1.1	2.113	4988.4	7274.1	22.7849	1.523	1.439	0.527	0.915	0.831	0.913		1.0665	0.456
7.84202	470.521	0.912	0.61	0.09	9836.4	2564.2	14907.9	2.1	-9.6	-20.77	0.0543	1.1019	0.3641	0.5778	-1.3	2.112	4988.3	7272.2	22.7849	1.518	1.431	0.519	0.91	0.823	0.908		1.064	0.456
7.87535	472.521	0.897	0.61	0.09	9837.8	2563.7	14908.2	2	-9.6	-20.77	0.0547	1.102	0.3641	0.5781	-1.4	2.079	4988.4	7274.1	22.7849	1.508	1.42	0.523	0.91	0.822	0.898		1.059	0.4485
7.90868	474.521	0.882	0.61	0.09	9837.8	2562.7	14906.2	2	-9.6	-20.77	0.0543	1.102	0.3639	0.5779	-1.5	2.044	4987.7	7275.1	22.785	1.488	1.401	0.519	0.9	0.813	0.878		1.049	0.441
7.94202	476.521	0.867	0.61	0.08	9836.4	2562.2	14903.9	2	-9.6	-20.77	0.0563	1.1019	0.3639	0.5788	-1.7	2.01	4986.9	7274.3	22.785	1.473	1.39	0.523	0.895	0.812	0.863		1.0415	0.4335
7.97535	478.521	0.852	0.61	0.08	9838.4	2562.2	14905.9	1.9	-9.61	-20.77	0.0521	1.1021	0.3639	0.5768	-1.8	1.976	4987.6	7276.3	22.785	1.458	1.379	0.527	0.89	0.811	0.848		1.034	0.426
8.00868	480.521	0.867	0.6	0.08	9837.1	2561.1	14902.5	2	-9.6	-20.77	0.0548	1.102	0.3637	0.5781	-1.7	2.01	4986.5	7276	22.7851	1.469	1.39	0.522	0.891	0.811	0.869		1.0345	0.4335
8.042	482.52	0.867	0.61	0.08	9836.4	2561.1	14901.8	2	-9.6	-20.77	0.0523	1.1019	0.3637	0.5768	-1.4	2.01	4986.2	7275.3	22.7851	1.473	1.39	0.523	0.895	0.812	0.863		1.0415	0.4335
8.07533	484.52	0.852	0.61	0.08	9837.1	2560.6	14901.5	1.9	-9.6	-20.77	0.0542	1.102	0.3636	0.5779	-1.6	1.976	4986.1	7276.5	22.7851	1.458	1.379	0.527	0.89	0.811	0.848		1.034	0.426
8.10867	486.52	0.837	0.61	0.08	9839.8	2559.6	14902.1	1.9	-9.6	-20.77	0.0542	1.1023	0.3635	0.578	-1.4	1.942	4986.3	7280.2	22.7851	1.448	1.369	0.532	0.89	0.811	0.838		1.029	0.4185
8.142	488.52	0.852	0.61	0.08	9837.1	2560.1	14900.5	1.9	-9.6	-20.76	0.0552	1.102	0.3636	0.5783	-1.5	1.976	4985.8	7277	22.7851	1.458	1.379	0.527	0.89	0.811	0.848		1.034	0.426
8.17533	490.52	0.837	0.61	0.08	9837.8	2560.1	14901.1	1.9	-9.6	-20.75	0.0545	1.102	0.3636	0.578	-1.4	1.942	4986	7277.7	22.7851	1.448	1.369	0.532	0.89	0.811	0.838		1.029	0.4185
8.20867	492.52	0.822	0.61	0.08	9837.8	2560.1	14901.1	1.9	-9.6	-20.75	0.0547	1.102	0.3636	0.5781	-1.5	1.908	4986	7277.7	22.7851	1.429	1.353	0.531	0.88	0.805	0.819		1.0195	0.411
8.242	494.52	0.867	0.61	0.08	9836.4	2560.1	14899.8	2	-9.6	-20.74	0.0526	1.1019	0.3636	0.577	-1.4	2.01	4985.6	7276.3	22.7851	1.478	1.399	0.532	0.9	0.821	0.868		1.044	0.4335
8.27532	496.519	0.837	0.61	0.08	9837.1	2560.6	14901.5	1.9	-9.6	-20.74	0.0555	1.102	0.3636	0.5785	-1.6	1.942	4986.1	7276.5	22.7851	1.448	1.365	0.527	0.89	0.807	0.838		1.029	0.4185
8.30865	498.519	0.822	0.61	0.07	9838.4	2560.6	14902.8	1.9	-9.6	-20.73	0.0532	1.1021	0.3636	0.5774	-1.6	1.908	4986.6	7277.8	22.7851	1.433	1.362	0.54	0.885	0.814	0.823		1.0215	0.411
8.34198	500.519	0.837	0.62	0.07	9837.1	2561.6	14903.5	1.9	-9.6	-20.72	0.0548	1.102	0.3638	0.5781	-1.6	1.943	4986.8	7275.5	22.785	1.453	1.382	0.545	0.895	0.824	0.833		1.0365	0.4185
8.37532	502.519	0.777	0.61	0.07	9836.4	2562.7	14904.9	1.8	-9.61	-20.72	0.0526	1.1019	0.3639	0.577	-1.8	1.806	4987.3	7273.8	22.785	1.388	1.317	0.54	0.87	0.799	0.778		0.999	0.3885
8.40865	504.519	0.807	0.61	0.07	9837.1	2564.2	14908.5	1.8	-9.61	-20.71	0.0538	1.102	0.3641	0.5776	-1.8	1.874	4988.5	7272.9	22.7849	1.418	1.347	0.54	0.88	0.809	0.808		1.014	0.4035
8.44198	506.519	0.807	0.62	0.07	9836.4	2566.2	14911.9	1.8	-9.6	-20.7	0.0538	1.1019	0.3644	0.5776	-1.7	1.874	4989.6	7270.2	22.7848	1.423	1.352	0.545	0.885	0.814	0.803		1.0215	0.4035
8.4753	508.518	0.807	0.62	0.08	9837.1	2566.8	14913.6	1.8	-9.6	-20.7	0.055	1.102	0.3645	0.5782	-1.6	1.875	4990.2	7270.3	22.7848	1.427	1.352	0.545	0.889	0.814	0.807		1.0235	0.4035
8.50863	510.518	0.807	0.61	0.08	9837.1	2567.3	14914.6	1.8	-9.6	-20.69	0.0542	1.102	0.3646	0.5779	-1.2	1.874	4990.5	7269.8	22.7848	1.418	1.343	0.536	0.88	0.805	0.808		1.014	0.4035
8.54197	512.518	0.822	0.62	0.07	9836.4	2567.8	14915	1.9	-9.6	-20.7	0.0556	1.1019	0.3646	0.5785	-1.2	1.909	4990.7	7268.7	22.7847	1.442	1.376	0.553	0.894	0.827	0.822		1.031	0.411
8.5753	514.518	0.792	0.62	0.07	9837.8	2567.3	14915.2	1.8	-9.6	-20.69	0.0548	1.102	0.3646	0.5782	-1.6	1.841	4990.8	7270.5	22.7848	1.413	1.342	0.549	0.884	0.813	0.793		1.0165	0.396
8.60863	516.518	0.807	0.62	0.07	9837.1	2566.2	14912.6	1.8	-9.6	-20.7	0.0545	1.102	0.3644	0.578	-1.6	1.874	4989.9	7270.9	22.7848	1.423	1.352	0.545	0.885	0.814	0.803		1.0215	0.4035
8.64197	518.518	0.792	0.62	0.06	9836.4	2566.8	14912.9	1.8	-9.6	-20.7	0.0517	1.1019	0.3645	0.5765	-1.6	1.84	4990	7269.7	22.7848	1.408	1.345	0.553	0.88	0.817	0.788		1.014	0.396
8.6753	520.518	0.777	0.61	0.07	9837.8	2565.7	14912.2	1.8	-9.6	-20.7	0.0539	1.102	0.3644	0.5777	-1.6	1.806	4989.7	7272	22.7848	1.388	1.322	0.544	0.87	0.803	0.778		0.999	0.3885
8.70862	522.517	0.777	0.61	0.06	9837.8	2564.7	14910.2	1.8	-9.61	-20.71	0.0536	1.102	0.3642	0.5776	-1.3	1.806	4989.1	7273.1	22.7849	1.388	1.326	0.548	0.87	0.807	0.778		0.999	0.3885
8.74195	524.517	0.777	0.61	0.06	9837.8	2564.2	14909.2	1.8	-9.61	-20.71	0.0547	1.102	0.3641	0.5781	-1.3	1.806	4988.7	7273.6	22.7849	1.384	1.321	0.544	0.865	0.803	0.774		0.997	0.3885
8.77528	526.517	0.763	0.6	0.06	9838.4	2564.2	14909.9	1.7	-9.63	-20.72	0.0536	1.1021	0.3641	0.5776	-1.7	1.771	4988.9	7274.2	22.7849	1.364	1.302	0.539	0.856	0.793	0.764		0.982	0.3815
8.80862	528.517	0.762	0.6	0.06	9837.1	2562.2	14904.5	1.7	-9.63	-20.72	0.0554	1.102	0.3639	0.5784	-1.7	1.771	4987.1	7274.9	22.785	1.359	1.301	0.539	0.851	0.793	0.759		0.9795	0.381
8.84195	530.517	0.762	0.6	0.06	9837.8	2561.6	14904.1	1.7	-9.62	-20.71	0.0538	1.102	0.3638	0.5777	-1.7	1.771	4987	7276.1	22.785	1.364	1.302	0.539	0.856	0.793	0.764		0.982	0.381
8.87528	532.517	0.792	0.61	0.07	9837.8	2561.6	14904.1	1.8	-9.61	-20.71	0.0558	1.102	0.3638	0.5787	-1.6	1.84	4987	7276.1	22.785	1.399	1.332	0.54	0.87	0.804	0.789		1.0045	0.396
8.9086	534.516	0.748	0.61	0.07	9839.1	2560.6	14903.5	1.7	-9.61	-20.71	0.0541	1.1022	0.3636	0.5779	-1.8	1.738	4986.8	7278.5	22.7851	1.354	1.287	0.54	0.855	0.789	0.744		0.982	0.374
8.94193	536.516	0.748	0.61	0.06	9836.4	2560.1	14899.8	1.7	-9.62	-20.71	0.0544	1.1019	0.3636	0.5779	-1.8	1.738	4985.6	7276.3	22.7851	1.354	1.291	0.544	0.855	0.793	0.744		0.982	0.374
8.97527	538.516	0.762	0.61	0.06	9838.4	2560.6	14902.8	1.7	-9.62	-20.71	0.0529	1.1021	0.3636	0.5773	-1.9	1.772	4986.6	7277.8	22.7851	1.369	1.31	0.548	0.86	0.802	0.759		0.9895	0.381
9.0086	540.516	0.748	0.6	0.06	9837.8	2560.1	14901.1	1.7	-9.62	-20.7	0.0548	1.102	0.3636	0.5782	-2	1.737	4986	7277.7	22.7851	1.349	1.291	0.543	0.851	0.792	0.749		0.9745	0.374
9.04193	542.516	0.748	0.61	0.06	9836.4	2560.1	14899.8	1.7	-9.62	-20.69	0.0537	1.1019	0.3636	0.5775	-1.7	1.738	4985.6	7276.3	22.7851	1.358	1.3	0.552	0.86	0.802	0.748		0.984	0.374
9.07527	544.516	0.748	0.62	0.06	9837.8	2561.1	14903.1	1.7	-9.62	-20.69	0.0532	1.102	0.3637	0.5774	-1.7	1.738	4986.7	7276.6	22.7851	1.363	1.3	0.553	0.865	0.802	0.743		0.9915	0.374
9.1086	546.516	0.733	0.61	0.06	9838.4	2560.1	14901.8	1.7	-9.62	-20.68	0.0523	1.1021	0.3636	0.5769	-1.6	1.704	4986.2	7278.3	22.7851	1.339	1.28	0.548	0.85	0.792	0.729		0.9745	0.3665
9.14192	548.515	0.733	0.61	0.06	9838.4	2561.6	14904.8	1.7	-9.62	-20.68	0.0555	1.1021	0.3638	0.5785	-1.7	1.704	4987.2	7276.8	22.785	1.343	1.281	0.548	0.855	0.793	0.733		0.9765	0.3665
9.17525	550.515	0.748	0.61	0.06	9837.1	2563.2	14906.5	1.7	-9.62	-20.68	0.0545	1.102	0.364	0.578	-1.7	1.738	4987.8	7273.9	22.785	1.358	1.296	0.548	0.86	0.797	0.748		0.984	0.374
9.20858	552.515	0.718	0.61	0.06	9838.4	2564.7	14910.9	1.6	-9.62	-20.67	0.0565	1.1021	0.3642	0.579	-1.6	1.669	4989.3	7273.7	22.7849	1.324	1.261	0.544	0.845	0.783	0.714		0.967	0.359
9.24192	554.515	0.748	0.61	0.06	9837.1	2565.7	14911.6	1.7	-9.62	-20.66	0.0525	1.102	0.3644	0.577	-1.6	1.738	4989.5	7271.4	22.7848	1.354	1.291	0.544	0.855	0.793	0.744		0.982	0.374
9.27525	556.515	0.733	0.61	0.07	9838.4	2566.8	14914.9	1.7	-9.62	-20.66	0.0543	1.1021	0.3645	0.578	-2	1.704	4990.7	7271.7	22.7848	1.343	1.277	0.544	0.855	0.788	0.733		0.9765	0.3665
9.30858	558.515	0.733	0.62	0.06	9837.8	2567.3	14915.2	1.7	-9.62	-20.66	0.0552	1.102	0.3646	0.5784	-1.6	1.704	4990.8	7270.5	22.7848	1.348	1.29	0.557	0.86	0.801	0.728		0.984	0.3665
9.34192	560.515	0.748	0.61	0.06	9838.4	2567.8	14917	1.7	-9.62	-20.66	0.0543	1.1021	0.3646	0.578	-1.6	1.738	4991.3	7270.7	22.7847	1.358	1.3	0.552	0.86	0.802	0.748		0.984	0.374
9.37523	562.514	0.777	0.61	0.07	9839.1	2567.8	14917.6	1.8	-9.62	-20.66	0.0545	1.1022	0.3646	0.5781	-1.8	1.806	4991.6	7271.3	22.7847	1.388	1.322	0.544	0.87	0.803	0.778		0.999	0.3885
9.40857	564.514	0.718	0.61	0.07	9837.1	2567.3	14914.6	1.6	-9.62	-20.66	0.0542	1.102	0.3646	0.5778	-1.8	1.67	4990.5	7269.8	22.7848	1.329	1.262	0.544	0.85	0.783	0.719		0.9695	0.359
9.4419	566.514	0.748	0.61	0.07	9835.8	2567.3	14913.2	1.7	-9.62	-20.66	0.0543	1.1018	0.3646	0.5778	-1.8	1.738	4990.1	7268.5	22.7848	1.354	1.283	0.535	0.855	0.785	0.744		0.982	0.374
9.47523	568.514	0.748	0.61	0.08	9837.8	2567.3	14915.2	1.7	-9.62	-20.67	0.056	1.102	0.3646	0.5788	-1.5	1.738	4990.8	7270.5	22.7848	1.354	1.279	0.531	0.855	0.78	0.744		0.982	0.374
9.50857	570.514	0.733	0.61	0.08	9837.1	2566.2	14912.6	1.7	-9.62	-20.67	0.0541	1.102	0.3644	0.5778	-1.5	1.704	4989.9	7270.9	22.7848	1.343	1.268	0.536	0.855	0.78	0.733		0.9765	0.3665
9.5419	572.514	0.733	0.61	0.08	9835.8	2565.7	14910.2	1.7	-9.62	-20.67	0.0537	1.1018	0.3644	0.5775	-1.9	1.704	4989.1	7270	22.7848	1.343	1.268	0.536	0.855	0.78	0.733		0.9765	0.3665
9.57522	574.513	0.733	0.61	0.08	9839.8	2564.2	14911.2	1.7	-9.62	-20.67	0.055	1.1023	0.3641	0.5784	-1.6	1.704	4989.4	7275.6	22.7849	1.339	1.255	0.523	0.85	0.767	0.729		0.9745	0.3665
9.60855	576.513	0.718	0.61	0.08	9839.1	2563.2	14908.5	1.6	-9.62	-20.67	0.0555	1.1022	0.364	0.5786	-1.8	1.669	4988.5	7275.9	22.785	1.324	1.24	0.523	0.845	0.762	0.714		0.967	0.359
9.64188	578.513	0.733	0.6	0.09	9837.8	2561.6	14904.1	1.7	-9.62	-20.68	0.0548	1.102	0.3638	0.5782	-1.8	1.703	4987	7276.1	22.785	1.334	1.247	0.514	0.846	0.758	0.734		0.967	0.3665
9.67522	580.513	0.718	0.61	0.09	9837.1	2560.1	14900.5	1.6	-9.62	-20.68	0.0545	1.102	0.3636	0.578	-1.8	1.669	4985.8	7277	22.7851	1.324	1.236	0.519	0.845	0.758	0.714		0.967	0.359
9.70855	582.513	0.748	0.61	0.09	9837.8	2559.1	14899.1	1.7	-9.62	-20.67	0.0534	1.102	0.3634	0.5775	-1.7	1.738	4985.3	7278.7	22.7851	1.354	1.266	0.519	0.855	0.768	0.744		0.982	0.374
9.74188	584.513	0.748	0.61	0.09	9837.1	2558.1	14896.4	1.7	-9.61	-20.67	0.0535	1.102	0.3633	0.5775	-1.6	1.738	4984.4	7279	22.7852	1.354	1.266	0.519	0.855	0.768	0.744		0.982	0.374
9.77522	586.513	0.733	0.62	0.1	9839.1	2558.1	14898.5	1.7	-9.61	-20.66	0.0538	1.1022	0.3633	0.5777	-1.6	1.704	4985.1	7281	22.7852	1.348	1.252	0.52	0.86	0.764	0.728		0.984	0.3665
9.80853	588.512	0.718	0.61	0.09	9839.1	2558.6	14899.5	1.6	-9.61	-20.65	0.0542	1.1022	0.3633	0.578	-1.4	1.67	4985.4	7280.5	22.7852	1.329	1.237	0.519	0.85	0.758	0.719		0.9695	0.359
9.84187	590.512	0.718	0.62	0.09	9838.4	2559.1	14899.8	1.6	-9.61	-20.64	0.0546	1.1021	0.3634	0.5781	-1.8	1.67	4985.5	7279.4	22.7851	1.333	1.241	0.524	0.855	0.763	0.713		0.9765	0.359
9.8752	592.512	0.703	0.62	0.1	9838.4	2559.6	14900.8	1.6	-9.61	-20.62	0.0549	1.1021	0.3635	0.5783	-1.6	1.636	4985.9	7278.8	22.7851	1.318	1.222	0.52	0.85	0.754	0.698		0.969	0.3515
9.90853	594.512	0.733	0.62	0.09	9839.1	2561.6	14905.5	1.7	-9.61	-20.61	0.055	1.1022	0.3638	0.5784	-1.4	1.704	4987.5	7277.5	22.785	1.348	1.256	0.524	0.86	0.768	0.728		0.984	0.3665
9.94187	596.512	0.718	0.62	0.1	9835.8	2564.7	14908.2	1.6	-9.61	-20.59	0.0554	1.1018	0.3642	0.5784	-1.6	1.671	4988.4	7271	22.7849	1.342	1.246	0.529	0.864	0.768	0.722		0.981	0.359
9.9752	598.512	0.733	0.62	0.1	9837.8	2566.2	14913.2	1.7	-9.61	-20.59	0.0547	1.102	0.3644	0.5781	-1.3	1.704	4990.1	7271.5	22.7848	1.353	1.253	0.52	0.864	0.764	0.733		0.9865	0.3665
10.0085	600.511	0.733	0.62	0.09	9836.4	2566.8	14912.9	1.7	-9.61	-20.58	0.0521	1.1019	0.3645	0.5767	-1.6	1.705	4990	7269.7	22.7848	1.357	1.266	0.533	0.869	0.777	0.737		0.9885	0.3665
10.0419	602.511	0.748	0.62	0.1	9837.8	2568.8	14918.3	1.7	-9.61	-20.58	0.0527	1.102	0.3648	0.5771	-1.4	1.738	4991.8	7269	22.7847	1.363	1.267	0.52	0.865	0.769	0.743		0.9915	0.374
10.0752	604.511	0.703	0.63	0.1	9835.8	2570.8	14920.3	1.6	-9.61	-20.57	0.0532	1.1018	0.3651	0.5772	-1.7	1.637	4992.5	7264.9	22.7846	1.332	1.236	0.533	0.864	0.768	0.702		0.981	0.3515
10.1085	606.511	0.703	0.62	0.08	9839.1	2570.3	14922.7	1.6	-9.62	-20.58	0.056	1.1022	0.365	0.5788	-1.3	1.636	4993.3	7268.8	22.7846	1.318	1.235	0.532	0.85	0.766	0.698		0.969	0.3515
10.1418	608.511	0.718	0.62	0.09	9837.8	2571.9	14924.3	1.6	-9.61	-20.58	0.0545	1.102	0.3652	0.578	-1.3	1.67	4993.8	7265.9	22.7846	1.338	1.25	0.533	0.859	0.772	0.718		0.979	0.359
10.1752	610.511	0.688	0.62	0.09	9837.8	2571.3	14923.3	1.6	-9.62	-20.59	0.0549	1.102	0.3652	0.5782	-1.5	1.602	4993.5	7266.4	22.7846	1.313	1.225	0.537	0.854	0.766	0.693		0.9665	0.344
10.2085	612.511	0.703	0.62	0.08	9837.1	2571.3	14922.6	1.6	-9.62	-20.59	0.0542	1.102	0.3652	0.5779	-1.6	1.636	4993.3	7265.8	22.7846	1.323	1.239	0.537	0.854	0.771	0.703		0.9715	0.3515
10.2418	614.51	0.718	0.62	0.08	9836.4	2572.4	14924	1.6	-9.62	-20.61	0.0547	1.1019	0.3653	0.578	-1.5	1.67	4993.7	7264.1	22.7845	1.333	1.25	0.532	0.855	0.771	0.713		0.9765	0.359
10.2752	616.51	0.718	0.62	0.08	9837.1	2572.4	14924.7	1.6	-9.62	-20.62	0.0555	1.102	0.3653	0.5785	-1.2	1.67	4993.9	7264.7	22.7845	1.338	1.254	0.537	0.859	0.776	0.718		0.979	0.359
10.3085	618.51	0.688	0.61	0.09	9837.8	2569.8	14920.3	1.6	-9.61	-20.63	0.0551	1.102	0.3649	0.5783	-1.2	1.602	4992.5	7268	22.7847	1.299	1.211	0.523	0.84	0.753	0.689		0.9545	0.344
10.3418	620.51	0.733	0.61	0.08	9837.1	2567.8	14915.6	1.7	-9.61	-20.64	0.0547	1.102	0.3646	0.5781	-1.2	1.704	4990.9	7269.3	22.7847	1.339	1.255	0.523	0.85	0.767	0.729		0.9745	0.3665
10.3752	622.51	0.703	0.6	0.09	9837.8	2564.2	14909.2	1.6	-9.63	-20.66	0.0544	1.102	0.3641	0.578	-1.3	1.635	4988.7	7273.6	22.7849	1.304	1.213	0.51	0.836	0.744	0.704		0.952	0.3515
10.4085	624.51	0.733	0.6	0.09	9839.1	2561.1	14904.5	1.7	-9.62	-20.66	0.0534	1.1022	0.3637	0.5775	-1.1	1.703	4987.1	7278	22.7851	1.334	1.242	0.51	0.846	0.754	0.734		0.967	0.3665
10.4418	626.51	0.703	0.61	0.1	9835.8	2559.1	14897.1	1.6	-9.62	-20.67	0.0547	1.1018	0.3634	0.578	-1.5	1.635	4984.6	7276.7	22.7851	1.309	1.213	0.51	0.84	0.745	0.699		0.9595	0.3515
10.4752	628.509	0.718	0.61	0.1	9837.8	2557.1	14895.1	1.6	-9.62	-20.67	0.0542	1.102	0.3631	0.5779	-1.6	1.669	4984	7280.7	22.7852	1.324	1.228	0.51	0.845	0.75	0.714		0.967	0.359
10.5085	630.509	0.718	0.61	0.09	9837.8	2555	14891	1.6	-9.61	-20.67	0.0545	1.102	0.3628	0.578	-1.5	1.669	4982.6	7282.8	22.7853	1.324	1.232	0.514	0.845	0.754	0.714		0.967	0.359
10.5418	632.509	0.703	0.61	0.1	9837.1	2555.5	14891.4	1.6	-9.61	-20.67	0.0532	1.102	0.3629	0.5773	-1.4	1.635	4982.7	7281.6	22.7853	1.309	1.213	0.51	0.84	0.745	0.699		0.9595	0.3515
10.5752	634.509	0.703	0.61	0.1	9837.8	2555	14891	1.6	-9.61	-20.66	0.0557	1.102	0.3628	0.5786	-1.2	1.636	4982.6	7282.8	22.7853	1.314	1.209	0.507	0.845	0.741	0.704		0.962	0.3515
10.6085	636.509	0.733	0.61	0.1	9837.8	2554.5	14890	1.7	-9.61	-20.65	0.0555	1.102	0.3628	0.5785	-1.2	1.704	4982.3	7283.3	22.7854	1.343	1.239	0.507	0.855	0.751	0.733		0.9765	0.3665
10.6418	638.509	0.733	0.61	0.1	9837.8	2555	14891	1.7	-9.61	-20.64	0.055	1.102	0.3628	0.5783	-1.5	1.704	4982.6	7282.8	22.7853	1.343	1.239	0.507	0.855	0.751	0.733		0.9765	0.3665
10.6751	640.508	0.733	0.62	0.12	9838.4	2555	14891.7	1.7	-9.61	-20.62	0.0534	1.1021	0.3628	0.5775	-1.5	1.704	4982.8	7283.4	22.7853	1.348	1.231	0.499	0.86	0.743	0.728		0.984	0.3665
10.7085	642.508	0.703	0.61	0.11	9837.1	2555	14890.4	1.6	-9.62	-20.62	0.0528	1.102	0.3628	0.5771	-1.1	1.636	4982.4	7282.1	22.7853	1.314	1.205	0.502	0.845	0.737	0.704		0.962	0.3515
10.7418	644.508	0.733	0.62	0.12	9837.8	2555	14891	1.7	-9.61	-20.61	0.0532	1.102	0.3628	0.5773	-1.5	1.704	4982.6	7282.8	22.7853	1.348	1.231	0.499	0.86	0.743	0.728		0.984	0.3665
10.7751	646.508	0.733	0.62	0.12	9838.4	2556.5	14894.8	1.7	-9.61	-20.59	0.0545	1.1021	0.3631	0.578	-1.5	1.705	4983.8	7281.9	22.7853	1.357	1.236	0.504	0.869	0.748	0.737		0.9885	0.3665
10.8085	648.508	0.733	0.62	0.12	9837.8	2558.1	14897.1	1.7	-9.61	-20.56	0.0535	1.102	0.3633	0.5775	-1.2	1.704	4984.6	7279.7	22.7852	1.348	1.231	0.499	0.86	0.743	0.728		0.984	0.3665
10.8418	650.508	0.733	0.62	0.12	9837.1	2562.2	14904.5	1.7	-9.62	-20.55	0.0559	1.102	0.3639	0.5787	-1.4	1.705	4987.1	7274.9	22.785	1.357	1.236	0.504	0.869	0.748	0.737		0.9885	0.3665
10.8751	652.508	0.733	0.63	0.13	9837.1	2563.2	14906.5	1.7	-9.61	-20.53	0.0535	1.102	0.364	0.5775	-1.1	1.705	4987.8	7273.9	22.785	1.362	1.237	0.504	0.874	0.748	0.732		0.996	0.3665
10.9084	654.507	0.703	0.63	0.12	9838.4	2564.7	14910.9	1.6	-9.61	-20.52	0.0544	1.1021	0.3642	0.578	-1.2	1.637	4989.3	7273.7	22.7849	1.332	1.211	0.508	0.864	0.743	0.702		0.981	0.3515
10.9418	656.507	0.688	0.63	0.12	9837.1	2568.3	14916.6	1.6	-9.61	-20.51	0.0532	1.102	0.3647	0.5773	-1.2	1.603	4991.2	7268.8	22.7847	1.317	1.196	0.508	0.859	0.738	0.687		0.9735	0.344
10.9751	658.507	0.688	0.64	0.12	9837.1	2570.8	14921.6	1.6	-9.62	-20.51	0.0553	1.102	0.3651	0.5784	-1.3	1.603	4992.9	7266.3	22.7846	1.326	1.205	0.518	0.868	0.747	0.686		0.983	0.344
11.0084	660.507	0.703	0.63	0.11	9837.8	2572.4	14925.3	1.6	-9.62	-20.5	0.0543	1.102	0.3653	0.5779	-1.2	1.637	4994.2	7265.4	22.7845	1.332	1.224	0.521	0.864	0.755	0.702		0.981	0.3515
11.0418	662.507	0.733	0.63	0.11	9836.4	2573.9	14927.1	1.7	-9.62	-20.5	0.0548	1.1019	0.3655	0.5781	-1.1	1.705	4994.7	7262.5	22.7845	1.362	1.254	0.521	0.874	0.765	0.732		0.996	0.3665
11.0751	664.507	0.733	0.63	0.11	9839.1	2574.4	14930.7	1.7	-9.61	-20.5	0.0542	1.1022	0.3656	0.578	-1.2	1.705	4996	7264.7	22.7844	1.362	1.254	0.521	0.874	0.765	0.732		0.996	0.3665
11.1084	666.506	0.718	0.63	0.11	9839.1	2574.9	14931.7	1.6	-9.61	-20.51	0.0553	1.1022	0.3657	0.5785	-1.2	1.671	4996.3	7264.2	22.7844	1.347	1.239	0.521	0.869	0.76	0.717		0.9885	0.359
11.1418	668.506	0.733	0.62	0.11	9836.4	2574.4	14928.1	1.7	-9.61	-20.53	0.0541	1.1019	0.3656	0.5777	-1.2	1.705	4995.1	7262	22.7844	1.357	1.245	0.512	0.869	0.756	0.737		0.9885	0.3665
11.1751	670.506	0.733	0.62	0.12	9835.8	2573.4	14925.4	1.7	-9.62	-20.54	0.0542	1.1018	0.3654	0.5778	-1.4	1.704	4994.2	7262.4	22.7845	1.353	1.236	0.503	0.864	0.748	0.733		0.9865	0.3665
11.2084	672.506	0.733	0.62	0.11	9839.1	2569.3	14920.6	1.7	-9.62	-20.56	0.055	1.1022	0.3649	0.5784	-1.2	1.704	4992.6	7269.8	22.7847	1.353	1.24	0.508	0.864	0.752	0.733		0.9865	0.3665
11.2418	674.506	0.718	0.62	0.12	9837.8	2565.2	14911.2	1.6	-9.62	-20.56	0.0555	1.102	0.3643	0.5785	-1.1	1.67	4989.4	7272.6	22.7849	1.333	1.216	0.499	0.855	0.738	0.713		0.9765	0.359
11.2751	676.506	0.718	0.62	0.13	9838.4	2561.1	14903.8	1.6	-9.63	-20.57	0.0538	1.1021	0.3637	0.5777	-1.5	1.67	4986.9	7277.3	22.7851	1.333	1.208	0.49	0.855	0.73	0.713		0.9765	0.359
11.3084	678.506	0.703	0.62	0.12	9837.8	2557.6	14896.1	1.6	-9.62	-20.58	0.0549	1.102	0.3632	0.5782	-1.2	1.636	4984.3	7280.2	22.7852	1.318	1.197	0.495	0.85	0.729	0.698		0.969	0.3515
11.3417	680.505	0.703	0.61	0.13	9837.1	2556	14892.4	1.6	-9.62	-20.58	0.0519	1.102	0.363	0.5767	-1.5	1.636	4983.1	7281.1	22.7853	1.314	1.188	0.486	0.845	0.72	0.704		0.962	0.3515
11.3751	682.505	0.703	0.62	0.13	9839.8	2555	14893	1.6	-9.62	-20.57	0.0541	1.1023	0.3628	0.5779	-1.3	1.636	4983.3	7284.8	22.7853	1.318	1.193	0.49	0.85	0.725	0.698		0.969	0.3515
11.4084	684.505	0.718	0.61	0.12	9837.1	2555	14890.4	1.6	-9.63	-20.58	0.0529	1.102	0.3628	0.5772	-1.3	1.67	4982.4	7282.1	22.7853	1.328	1.212	0.494	0.85	0.733	0.718		0.969	0.359
11.4418	686.505	0.703	0.62	0.11	9837.1	2556	14892.4	1.6	-9.63	-20.57	0.0548	1.102	0.363	0.5781	-1.2	1.636	4983.1	7281.1	22.7853	1.318	1.21	0.507	0.85	0.741	0.698		0.969	0.3515
11.4751	688.505	0.703	0.62	0.11	9836.4	2557.1	14893.8	1.6	-9.62	-20.56	0.0533	1.1019	0.3631	0.5773	-1.6	1.636	4983.5	7279.4	22.7852	1.323	1.214	0.512	0.854	0.746	0.703		0.9715	0.3515
11.5084	690.505	0.718	0.62	0.11	9838.4	2559.1	14899.8	1.6	-9.62	-20.55	0.0551	1.1021	0.3634	0.5784	-1.2	1.67	4985.5	7279.4	22.7851	1.333	1.225	0.507	0.855	0.746	0.713		0.9765	0.359
11.5418	692.505	0.718	0.62	0.1	9837.8	2562.2	14905.2	1.6	-9.64	-20.55	0.0543	1.102	0.3639	0.5779	-1.3	1.67	4987.4	7275.6	22.785	1.333	1.233	0.515	0.855	0.755	0.713		0.9765	0.359
11.5751	694.504	0.703	0.61	0.1	9838.4	2563.7	14908.9	1.6	-9.64	-20.55	0.0571	1.1021	0.3641	0.5794	-1.2	1.636	4988.6	7274.8	22.7849	1.314	1.209	0.507	0.845	0.741	0.704		0.962	0.3515
11.6084	696.504	0.673	0.61	0.1	9836.4	2566.2	14911.9	1.5	-9.64	-20.55	0.0539	1.1019	0.3644	0.5776	-1.3	1.567	4989.6	7270.2	22.7848	1.279	1.183	0.51	0.831	0.735	0.669		0.9445	0.3365
11.6417	698.504	0.703	0.61	0.1	9837.8	2567.3	14915.2	1.6	-9.64	-20.55	0.0539	1.102	0.3646	0.5777	-1	1.635	4990.8	7270.5	22.7848	1.309	1.213	0.51	0.84	0.745	0.699		0.9595	0.3515
11.6751	700.504	0.703	0.61	0.1	9838.4	2568.3	14918	1.6	-9.63	-20.54	0.0527	1.1021	0.3647	0.5772	-1	1.636	4991.7	7270.2	22.7847	1.314	1.218	0.515	0.845	0.749	0.704		0.962	0.3515
11.7084	702.504	0.688	0.61	0.09	9837.8	2568.8	14918.3	1.6	-9.63	-20.55	0.055	1.102	0.3648	0.5783	-0.9	1.601	4991.8	7269	22.7847	1.294	1.202	0.514	0.835	0.744	0.684		0.952	0.344
11.7417	704.504	0.733	0.61	0.09	9837.8	2569.8	14920.3	1.7	-9.62	-20.55	0.0537	1.102	0.3649	0.5776	-1.3	1.704	4992.5	7268	22.7847	1.343	1.252	0.519	0.855	0.763	0.733		0.9765	0.3665
11.7751	706.503	0.703	0.61	0.09	9838.4	2569.8	14921	1.6	-9.63	-20.56	0.056	1.1021	0.3649	0.5788	-1.3	1.635	4992.7	7268.6	22.7847	1.309	1.217	0.514	0.84	0.749	0.699		0.9595	0.3515
11.8084	708.503	0.688	0.6	0.09	9838.4	2569.3	14920	1.6	-9.63	-20.57	0.0537	1.1021	0.3649	0.5777	-1.2	1.601	4992.4	7269.1	22.7847	1.289	1.198	0.51	0.831	0.739	0.689		0.9445	0.344
11.8417	710.503	0.703	0.61	0.09	9837.8	2569.8	14920.3	1.6	-9.63	-20.58	0.0549	1.102	0.3649	0.5782	-1.1	1.635	4992.5	7268	22.7847	1.309	1.217	0.514	0.84	0.749	0.699		0.9595	0.3515
11.875	712.503	0.748	0.61	0.1	9838.4	2568.8	14919	1.7	-9.63	-20.6	0.0551	1.1021	0.3648	0.5784	-1.3	1.738	4992	7269.7	22.7847	1.354	1.258	0.51	0.855	0.76	0.744		0.982	0.374
11.9084	714.503	0.718	0.6	0.09	9839.1	2568.3	14918.6	1.6	-9.63	-20.6	0.0555	1.1022	0.3647	0.5786	-1.4	1.669	4991.9	7270.8	22.7847	1.319	1.232	0.514	0.841	0.753	0.719		0.9595	0.359
11.9417	716.503	0.718	0.6	0.09	9838.4	2568.3	14918	1.6	-9.63	-20.62	0.0542	1.1021	0.3647	0.5779	-1.6	1.669	4991.7	7270.2	22.7847	1.315	1.227	0.509	0.836	0.749	0.715		0.9575	0.359
11.9751	718.503	0.703	0.6	0.1	9837.8	2566.2	14913.2	1.6	-9.63	-20.63	0.0546	1.102	0.3644	0.5781	-1.7	1.635	4990.1	7271.5	22.7848	1.304	1.208	0.506	0.836	0.74	0.704		0.952	0.3515
12.0084	720.502	0.718	0.6	0.08	9837.8	2563.7	14908.2	1.6	-9.63	-20.64	0.0529	1.102	0.3641	0.5772	-1.7	1.669	4988.4	7274.1	22.7849	1.315	1.231	0.514	0.836	0.753	0.715		0.9575	0.359
12.0417	722.502	0.718	0.6	0.09	9837.1	2562.2	14904.5	1.6	-9.62	-20.66	0.0555	1.102	0.3639	0.5785	-1.6	1.669	4987.1	7274.9	22.785	1.315	1.227	0.509	0.836	0.749	0.715		0.9575	0.359
12.075	724.502	0.703	0.6	0.09	9838.4	2560.6	14902.8	1.6	-9.62	-20.66	0.0539	1.1021	0.3636	0.5778	-1.6	1.635	4986.6	7277.8	22.7851	1.304	1.213	0.51	0.836	0.744	0.704		0.952	0.3515
12.1084	726.502	0.718	0.6	0.09	9837.1	2558.6	14897.4	1.6	-9.62	-20.66	0.0549	1.102	0.3633	0.5782	-1.2	1.669	4984.8	7278.5	22.7852	1.315	1.227	0.509	0.836	0.749	0.715		0.9575	0.359
12.1417	728.502	0.703	0.6	0.08	9835.8	2557.6	14894.1	1.6	-9.62	-20.67	0.0544	1.1018	0.3632	0.5778	-1.5	1.635	4983.6	7278.2	22.7852	1.3	1.216	0.514	0.831	0.748	0.7		0.95	0.3515
12.175	730.502	0.703	0.6	0.09	9837.8	2557.6	14896.1	1.6	-9.63	-20.67	0.0563	1.102	0.3632	0.5789	-1.6	1.635	4984.3	7280.2	22.7852	1.304	1.213	0.51	0.836	0.744	0.704		0.952	0.3515
12.2083	732.501	0.688	0.6	0.09	9837.1	2557.6	14895.4	1.6	-9.62	-20.67	0.0534	1.102	0.3632	0.5775	-1.2	1.601	4984.1	7279.5	22.7852	1.285	1.197	0.509	0.826	0.739	0.685		0.9425	0.344
12.2417	734.501	0.718	0.6	0.08	9837.1	2558.1	14896.4	1.6	-9.62	-20.67	0.0551	1.102	0.3633	0.5783	-1.6	1.669	4984.4	7279	22.7852	1.315	1.231	0.514	0.836	0.753	0.715		0.9575	0.359
12.275	736.501	0.718	0.6	0.09	9837.1	2558.1	14896.4	1.6	-9.62	-20.67	0.0539	1.102	0.3633	0.5777	-1.6	1.669	4984.4	7279	22.7852	1.319	1.232	0.514	0.841	0.753	0.719		0.9595	0.359
12.3083	738.501	0.688	0.6	0.08	9837.1	2558.1	14896.4	1.6	-9.61	-20.66	0.0555	1.102	0.3633	0.5785	-1.3	1.601	4984.4	7279	22.7852	1.289	1.206	0.518	0.831	0.747	0.689		0.9445	0.344
12.3417	740.501	0.703	0.6	0.08	9838.4	2559.6	14900.8	1.6	-9.62	-20.66	0.0539	1.1021	0.3635	0.5777	-1.3	1.635	4985.9	7278.8	22.7851	1.3	1.216	0.514	0.831	0.748	0.7		0.95	0.3515
12.375	742.501	0.718	0.6	0.08	9838.4	2560.1	14901.8	1.6	-9.62	-20.66	0.0547	1.1021	0.3636	0.5781	-1.6	1.669	4986.2	7278.3	22.7851	1.319	1.236	0.518	0.841	0.757	0.719		0.9595	0.359
12.4084	744.501	0.703	0.59	0.08	9837.8	2561.1	14903.1	1.6	-9.62	-20.66	0.0528	1.102	0.3637	0.5772	-1.4	1.635	4986.7	7276.6	22.7851	1.295	1.22	0.517	0.827	0.752	0.705		0.9425	0.3515
12.4417	746.5	0.718	0.59	0.08	9837.1	2562.2	14904.5	1.6	-9.63	-20.66	0.0564	1.102	0.3639	0.5789	-1.3	1.669	4987.1	7274.9	22.785	1.31	1.235	0.517	0.832	0.757	0.72		0.95	0.359
12.475	748.5	0.718	0.6	0.08	9837.1	2563.7	14907.5	1.6	-9.63	-20.66	0.0553	1.102	0.3641	0.5784	-1.2	1.669	4988.2	7273.4	22.7849	1.315	1.24	0.522	0.836	0.761	0.715		0.9575	0.359
12.5083	750.5	0.703	0.59	0.08	9838.4	2565.2	14911.9	1.6	-9.63	-20.65	0.0549	1.1021	0.3643	0.5783	-1.3	1.635	4989.6	7273.2	22.7849	1.295	1.22	0.517	0.827	0.752	0.705		0.9425	0.3515
12.5417	752.5	0.718	0.6	0.07	9837.1	2566.2	14912.6	1.6	-9.61	-20.65	0.0538	1.102	0.3644	0.5776	-1.3	1.669	4989.9	7270.9	22.7848	1.315	1.244	0.526	0.836	0.765	0.715		0.9575	0.359
12.575	754.5	0.703	0.6	0.08	9838.4	2567.3	14915.9	1.6	-9.62	-20.66	0.0532	1.1021	0.3646	0.5774	-1.3	1.635	4991	7271.2	22.7848	1.304	1.229	0.527	0.836	0.761	0.704		0.952	0.3515
12.6083	756.5	0.688	0.59	0.07	9838.4	2567.3	14915.9	1.6	-9.63	-20.66	0.0545	1.1021	0.3646	0.578	-1.4	1.601	4991	7271.2	22.7848	1.28	1.209	0.521	0.822	0.751	0.69		0.935	0.344
12.6417	758.5	0.703	0.6	0.07	9837.1	2568.8	14917.6	1.6	-9.62	-20.66	0.0527	1.102	0.3648	0.5771	-1.6	1.635	4991.6	7268.3	22.7847	1.3	1.233	0.53	0.831	0.764	0.7		0.95	0.3515
12.675	760.499	0.718	0.6	0.07	9836.4	2568.8	14917	1.6	-9.62	-20.67	0.0533	1.1019	0.3648	0.5773	-1.6	1.669	4991.3	7267.6	22.7847	1.315	1.244	0.526	0.836	0.765	0.715		0.9575	0.359
12.7083	762.499	0.688	0.59	0.06	9837.8	2568.8	14918.3	1.6	-9.63	-20.68	0.055	1.102	0.3648	0.5783	-1.6	1.6	4991.8	7269	22.7847	1.275	1.213	0.525	0.817	0.754	0.685		0.9325	0.344
12.7416	764.499	0.718	0.59	0.07	9837.1	2568.3	14916.6	1.6	-9.62	-20.69	0.0531	1.102	0.3647	0.5773	-1.6	1.669	4991.2	7268.8	22.7847	1.31	1.243	0.526	0.832	0.765	0.72		0.95	0.359
12.775	766.499	0.718	0.59	0.06	9838.4	2567.8	14917	1.6	-9.63	-20.7	0.0543	1.1021	0.3646	0.578	-1.9	1.668	4991.3	7270.7	22.7847	1.305	1.247	0.529	0.827	0.769	0.715		0.9475	0.359
12.8083	768.499	0.703	0.58	0.06	9837.8	2567.3	14915.2	1.6	-9.63	-20.71	0.0544	1.102	0.3646	0.578	-1.4	1.634	4990.8	7270.5	22.7848	1.281	1.223	0.52	0.813	0.754	0.701		0.9305	0.3515
12.8416	770.499	0.673	0.58	0.06	9837.1	2567.8	14915.6	1.5	-9.63	-20.73	0.0561	1.102	0.3646	0.5788	-1.7	1.566	4990.9	7269.3	22.7847	1.251	1.189	0.516	0.803	0.74	0.671		0.9155	0.3365
12.875	772.498	0.718	0.58	0.06	9837.1	2566.8	14913.6	1.6	-9.63	-20.75	0.0537	1.102	0.3645	0.5776	-2.1	1.668	4990.2	7270.3	22.7848	1.301	1.242	0.525	0.822	0.764	0.721		0.9405	0.359
12.9083	774.498	0.718	0.57	0.06	9838.4	2563.7	14908.9	1.6	-9.63	-20.75	0.0537	1.1021	0.3641	0.5777	-1.9	1.668	4988.6	7274.8	22.7849	1.291	1.233	0.515	0.813	0.755	0.721		0.9305	0.359
12.9416	776.498	0.733	0.57	0.06	9837.1	2562.2	14904.5	1.7	-9.63	-20.77	0.054	1.102	0.3639	0.5777	-1.7	1.701	4987.1	7274.9	22.785	1.302	1.243	0.511	0.813	0.755	0.732		0.936	0.3665
12.975	778.498	0.703	0.58	0.06	9837.8	2560.1	14901.1	1.6	-9.63	-20.77	0.0544	1.102	0.3636	0.578	-1.9	1.634	4986	7277.7	22.7851	1.281	1.223	0.52	0.813	0.754	0.701		0.9305	0.3515
13.0083	780.498	0.733	0.57	0.05	9837.8	2559.1	14899.1	1.7	-9.63	-20.78	0.0539	1.102	0.3634	0.5777	-1.9	1.702	4985.3	7278.7	22.7851	1.306	1.252	0.52	0.818	0.764	0.736		0.938	0.3665
13.0416	782.498	0.718	0.57	0.05	9837.1	2558.1	14896.4	1.6	-9.63	-20.79	0.0548	1.102	0.3633	0.5781	-1.9	1.668	4984.4	7279	22.7852	1.291	1.237	0.52	0.813	0.759	0.721		0.9305	0.359
13.075	784.498	0.718	0.57	0.05	9837.8	2558.1	14897.1	1.6	-9.63	-20.79	0.0537	1.102	0.3633	0.5776	-2.1	1.668	4984.6	7279.7	22.7852	1.291	1.237	0.52	0.813	0.759	0.721		0.9305	0.359
13.1083	786.497	0.688	0.57	0.05	9837.1	2558.6	14897.4	1.6	-9.63	-20.79	0.0538	1.102	0.3633	0.5776	-2	1.6	4984.8	7278.5	22.7852	1.262	1.207	0.52	0.803	0.749	0.692		0.916	0.344
13.1416	788.497	0.733	0.57	0.05	9837.8	2558.6	14898.1	1.7	-9.62	-20.79	0.0538	1.102	0.3633	0.5777	-1.9	1.702	4985	7279.2	22.7852	1.306	1.252	0.52	0.818	0.764	0.736		0.938	0.3665
13.1749	790.497	0.718	0.57	0.06	9838.4	2559.1	14899.8	1.6	-9.63	-20.79	0.0555	1.1021	0.3634	0.5785	-2	1.668	4985.5	7279.4	22.7851	1.291	1.233	0.515	0.813	0.755	0.721		0.9305	0.359
13.2083	792.497	0.718	0.57	0.05	9837.8	2558.1	14897.1	1.6	-9.63	-20.79	0.0545	1.102	0.3633	0.578	-1.9	1.667	4984.6	7279.7	22.7852	1.287	1.233	0.515	0.808	0.754	0.717		0.9285	0.359
13.2416	794.497	0.688	0.56	0.05	9837.8	2559.1	14899.1	1.6	-9.63	-20.79	0.055	1.102	0.3634	0.5783	-2	1.599	4985.3	7278.7	22.7851	1.252	1.202	0.515	0.794	0.744	0.692		0.906	0.344
13.2749	796.497	0.688	0.57	0.05	9837.1	2559.6	14899.5	1.6	-9.63	-20.78	0.0547	1.102	0.3635	0.5781	-2.2	1.6	4985.4	7277.5	22.7851	1.262	1.207	0.52	0.803	0.749	0.692		0.916	0.344
13.3083	798.496	0.718	0.57	0.06	9838.4	2560.1	14901.8	1.6	-9.63	-20.77	0.0541	1.1021	0.3636	0.5779	-2.2	1.667	4986.2	7278.3	22.7851	1.287	1.228	0.511	0.808	0.75	0.717		0.9285	0.359
13.3416	800.496	0.703	0.58	0.05	9837.8	2560.1	14901.1	1.6	-9.62	-20.77	0.0537	1.102	0.3636	0.5776	-1.7	1.634	4986	7277.7	22.7851	1.281	1.227	0.524	0.813	0.758	0.701		0.9305	0.3515
13.3749	802.496	0.688	0.58	0.06	9837.1	2561.6	14903.5	1.6	-9.62	-20.77	0.0541	1.102	0.3638	0.5778	-2	1.6	4986.8	7275.5	22.785	1.266	1.208	0.52	0.808	0.749	0.686		0.923	0.344
13.4083	804.496	0.703	0.57	0.05	9838.4	2562.7	14906.9	1.6	-9.62	-20.77	0.054	1.1021	0.3639	0.5778	-1.9	1.633	4987.9	7275.8	22.785	1.272	1.218	0.515	0.803	0.749	0.702		0.921	0.3515
13.4416	806.496	0.718	0.57	0.05	9837.8	2564.2	14909.2	1.6	-9.63	-20.77	0.0544	1.102	0.3641	0.578	-1.6	1.668	4988.7	7273.6	22.7849	1.291	1.241	0.524	0.813	0.763	0.721		0.9305	0.359
13.4749	808.496	0.703	0.57	0.05	9839.1	2564.2	14910.6	1.6	-9.63	-20.77	0.0563	1.1022	0.3641	0.579	-1.9	1.634	4989.2	7274.9	22.7849	1.277	1.222	0.52	0.808	0.754	0.707		0.9235	0.3515
13.5083	810.496	0.703	0.57	0.05	9835.8	2565.2	14909.2	1.6	-9.63	-20.77	0.0552	1.1018	0.3643	0.5782	-1.9	1.634	4988.7	7270.5	22.7849	1.277	1.226	0.524	0.808	0.758	0.707		0.9235	0.3515
13.5416	812.495	0.688	0.57	0.05	9837.1	2565.2	14910.6	1.6	-9.63	-20.77	0.0547	1.102	0.3643	0.5781	-1.9	1.6	4989.2	7271.9	22.7849	1.262	1.207	0.52	0.803	0.749	0.692		0.916	0.344
13.5749	814.495	0.733	0.58	0.06	9837.8	2565.7	14912.2	1.7	-9.63	-20.77	0.0538	1.102	0.3644	0.5777	-1.9	1.702	4989.7	7272	22.7848	1.311	1.253	0.52	0.823	0.764	0.731		0.9455	0.3665
13.6082	816.495	0.688	0.57	0.05	9837.8	2565.2	14911.2	1.6	-9.63	-20.77	0.0542	1.102	0.3643	0.5779	-1.7	1.6	4989.4	7272.6	22.7849	1.262	1.207	0.52	0.803	0.749	0.692		0.916	0.344
13.6416	818.495	0.703	0.57	0.05	9836.4	2564.7	14908.9	1.6	-9.63	-20.77	0.0521	1.1019	0.3642	0.5767	-1.6	1.634	4988.6	7271.7	22.7849	1.277	1.222	0.52	0.808	0.754	0.707		0.9235	0.3515
13.6749	820.495	0.703	0.58	0.06	9837.1	2565.2	14910.6	1.6	-9.63	-20.77	0.0535	1.102	0.3643	0.5775	-1.7	1.634	4989.2	7271.9	22.7849	1.281	1.223	0.52	0.813	0.754	0.701		0.9305	0.3515
13.7082	822.495	0.688	0.57	0.05	9836.4	2565.2	14909.9	1.6	-9.63	-20.77	0.0534	1.1019	0.3643	0.5774	-1.6	1.6	4989	7271.2	22.7849	1.262	1.207	0.52	0.803	0.749	0.692		0.916	0.344
13.7416	824.495	0.718	0.57	0.05	9837.1	2564.7	14909.5	1.6	-9.62	-20.78	0.0543	1.102	0.3642	0.5779	-1.9	1.668	4988.8	7272.4	22.7849	1.291	1.237	0.52	0.813	0.759	0.721		0.9305	0.359
13.7749	826.494	0.688	0.57	0.06	9838.4	2565.2	14911.9	1.6	-9.63	-20.78	0.0543	1.1021	0.3643	0.578	-2	1.6	4989.6	7273.2	22.7849	1.262	1.203	0.515	0.803	0.745	0.692		0.916	0.344
13.8082	828.494	0.733	0.57	0.05	9837.1	2564.7	14909.5	1.7	-9.63	-20.78	0.0552	1.102	0.3642	0.5783	-2.2	1.701	4988.8	7272.4	22.7849	1.302	1.248	0.515	0.813	0.759	0.732		0.936	0.3665
13.8416	830.494	0.703	0.57	0.06	9836.4	2565.2	14909.9	1.6	-9.62	-20.78	0.0537	1.1019	0.3643	0.5776	-1.7	1.634	4989	7271.2	22.7849	1.277	1.218	0.515	0.808	0.75	0.707		0.9235	0.3515
13.8749	832.494	0.733	0.57	0.06	9838.4	2565.2	14911.9	1.7	-9.63	-20.78	0.0573	1.1021	0.3643	0.5794	-2.3	1.701	4989.6	7273.2	22.7849	1.302	1.243	0.511	0.813	0.755	0.732		0.936	0.3665
13.9082	834.494	0.688	0.57	0.05	9836.4	2565.2	14909.9	1.6	-9.63	-20.79	0.0534	1.1019	0.3643	0.5774	-2	1.599	4989	7271.2	22.7849	1.257	1.203	0.515	0.798	0.744	0.687		0.9135	0.344
13.9416	836.494	0.718	0.57	0.06	9836.4	2564.2	14907.9	1.6	-9.62	-20.8	0.0541	1.1019	0.3641	0.5777	-1.5	1.667	4988.3	7272.2	22.7849	1.287	1.228	0.511	0.808	0.75	0.717		0.9285	0.359
13.9749	838.493	0.703	0.57	0.06	9837.8	2563.7	14908.2	1.6	-9.63	-20.8	0.053	1.102	0.3641	0.5773	-1.5	1.633	4988.4	7274.1	22.7849	1.272	1.214	0.511	0.803	0.745	0.702		0.921	0.3515
14.0082	840.493	0.718	0.57	0.06	9837.8	2563.2	14907.2	1.6	-9.63	-20.8	0.0552	1.102	0.364	0.5784	-1.7	1.667	4988	7274.6	22.785	1.287	1.224	0.507	0.808	0.746	0.717		0.9285	0.359
14.0416	842.493	0.718	0.56	0.06	9838.4	2562.7	14906.9	1.6	-9.62	-20.8	0.0537	1.1021	0.3639	0.5777	-1.6	1.667	4987.9	7275.8	22.785	1.282	1.224	0.506	0.804	0.745	0.722		0.921	0.359
14.0749	844.493	0.733	0.57	0.06	9837.1	2562.2	14904.5	1.7	-9.62	-20.8	0.0545	1.102	0.3639	0.578	-1.9	1.701	4987.1	7274.9	22.785	1.302	1.243	0.511	0.813	0.755	0.732		0.936	0.3665
14.1082	846.493	0.703	0.57	0.06	9838.4	2562.2	14905.9	1.6	-9.62	-20.8	0.0542	1.1021	0.3639	0.5779	-1.9	1.633	4987.6	7276.3	22.785	1.272	1.214	0.511	0.803	0.745	0.702		0.921	0.3515
14.1416	848.493	0.703	0.57	0.06	9837.8	2561.6	14904.1	1.6	-9.62	-20.8	0.0556	1.102	0.3638	0.5786	-1.6	1.633	4987	7276.1	22.785	1.272	1.209	0.507	0.803	0.741	0.702		0.921	0.3515
14.1749	850.493	0.688	0.57	0.07	9837.8	2562.7	14906.2	1.6	-9.62	-20.8	0.0537	1.102	0.3639	0.5776	-1.9	1.6	4987.7	7275.1	22.785	1.262	1.195	0.507	0.803	0.736	0.692		0.916	0.344
14.2082	852.492	0.703	0.57	0.06	9837.8	2562.2	14905.2	1.6	-9.62	-20.79	0.0549	1.102	0.3639	0.5782	-1.7	1.633	4987.4	7275.6	22.785	1.272	1.214	0.511	0.803	0.745	0.702		0.921	0.3515
14.2415	854.492	0.718	0.57	0.06	9837.8	2561.6	14904.1	1.6	-9.61	-20.8	0.053	1.102	0.3638	0.5773	-1.3	1.668	4987	7276.1	22.785	1.291	1.233	0.515	0.813	0.755	0.721		0.9305	0.359
14.2749	856.492	0.673	0.57	0.06	9838.4	2562.2	14905.9	1.5	-9.62	-20.8	0.055	1.1021	0.3639	0.5783	-1.8	1.565	4987.6	7276.3	22.785	1.247	1.184	0.511	0.798	0.736	0.677		0.9085	0.3365
14.3082	858.492	0.703	0.57	0.06	9838.4	2562.2	14905.9	1.6	-9.62	-20.79	0.0526	1.1021	0.3639	0.5771	-1.9	1.634	4987.6	7276.3	22.785	1.277	1.214	0.511	0.808	0.746	0.707		0.9235	0.3515
14.3415	860.492	0.718	0.57	0.06	9837.1	2561.1	14902.5	1.6	-9.62	-20.8	0.0542	1.102	0.3637	0.5779	-1.5	1.667	4986.5	7276	22.7851	1.287	1.224	0.507	0.808	0.746	0.717		0.9285	0.359
14.3749	862.492	0.718	0.57	0.07	9837.8	2560.6	14902.1	1.6	-9.62	-20.8	0.0524	1.102	0.3636	0.577	-1.9	1.668	4986.3	7277.2	22.7851	1.291	1.225	0.507	0.813	0.746	0.721		0.9305	0.359
14.4082	864.491	0.733	0.57	0.07	9837.1	2561.6	14903.5	1.7	-9.62	-20.79	0.0547	1.102	0.3638	0.5781	-1.6	1.702	4986.8	7275.5	22.785	1.306	1.24	0.507	0.818	0.751	0.736		0.938	0.3665
14.4415	866.491	0.688	0.57	0.06	9837.8	2561.6	14904.1	1.6	-9.61	-20.79	0.0546	1.102	0.3638	0.5781	-1.7	1.6	4987	7276.1	22.785	1.262	1.199	0.511	0.803	0.741	0.692		0.916	0.344
14.4748	868.491	0.703	0.58	0.07	9837.8	2562.2	14905.2	1.6	-9.61	-20.79	0.055	1.102	0.3639	0.5783	-1.9	1.634	4987.4	7275.6	22.785	1.281	1.214	0.512	0.813	0.746	0.701		0.9305	0.3515
14.5082	870.491	0.718	0.57	0.06	9837.8	2561.6	14904.1	1.6	-9.61	-20.79	0.0537	1.102	0.3638	0.5776	-1.5	1.668	4987	7276.1	22.785	1.291	1.233	0.515	0.813	0.755	0.721		0.9305	0.359
14.5415	872.491	0.718	0.57	0.06	9837.1	2562.2	14904.5	1.6	-9.61	-20.78	0.0544	1.102	0.3639	0.5779	-1.6	1.668	4987.1	7274.9	22.785	1.291	1.229	0.511	0.813	0.751	0.721		0.9305	0.359
14.5748	874.491	0.703	0.58	0.07	9837.8	2562.2	14905.2	1.6	-9.62	-20.78	0.0542	1.102	0.3639	0.5779	-1.9	1.634	4987.4	7275.6	22.785	1.286	1.219	0.516	0.817	0.751	0.706		0.933	0.3515
14.6082	876.491	0.718	0.57	0.07	9838.4	2562.2	14905.9	1.6	-9.62	-20.78	0.0555	1.1021	0.3639	0.5786	-1.9	1.668	4987.6	7276.3	22.785	1.291	1.225	0.507	0.813	0.746	0.721		0.9305	0.359
14.6415	878.49	0.703	0.57	0.06	9837.8	2561.6	14904.1	1.6	-9.62	-20.78	0.0535	1.102	0.3638	0.5775	-1.7	1.633	4987	7276.1	22.785	1.272	1.209	0.507	0.803	0.741	0.702		0.921	0.3515
14.6748	880.49	0.703	0.57	0.06	9837.8	2562.7	14906.2	1.6	-9.62	-20.78	0.0539	1.102	0.3639	0.5777	-1.9	1.634	4987.7	7275.1	22.785	1.277	1.214	0.511	0.808	0.746	0.707		0.9235	0.3515
14.7082	882.49	0.673	0.57	0.07	9837.1	2562.2	14904.5	1.5	-9.62	-20.78	0.0535	1.102	0.3639	0.5775	-1.7	1.565	4987.1	7274.9	22.785	1.247	1.18	0.507	0.798	0.731	0.677		0.9085	0.3365
14.7415	884.49	0.718	0.57	0.07	9836.4	2562.7	14904.9	1.6	-9.62	-20.78	0.0545	1.1019	0.3639	0.5779	-1.5	1.667	4987.3	7273.8	22.785	1.287	1.22	0.502	0.808	0.742	0.717		0.9285	0.359
14.7748	886.49	0.718	0.58	0.07	9837.8	2562.2	14905.2	1.6	-9.62	-20.77	0.055	1.102	0.3639	0.5783	-1.5	1.668	4987.4	7275.6	22.785	1.296	1.225	0.508	0.818	0.747	0.716		0.938	0.359
14.8082	888.49	0.703	0.57	0.06	9837.8	2562.2	14905.2	1.6	-9.62	-20.77	0.0558	1.102	0.3639	0.5786	-1.6	1.634	4987.4	7275.6	22.785	1.277	1.218	0.515	0.808	0.75	0.707		0.9235	0.3515
14.8415	890.49	0.688	0.57	0.06	9837.8	2562.7	14906.2	1.6	-9.62	-20.77	0.0548	1.102	0.3639	0.5782	-1.5	1.6	4987.7	7275.1	22.785	1.262	1.199	0.511	0.803	0.741	0.692		0.916	0.344
14.8748	892.489	0.733	0.58	0.07	9838.4	2562.7	14906.9	1.7	-9.62	-20.77	0.0558	1.1021	0.3639	0.5787	-1.6	1.702	4987.9	7275.8	22.785	1.311	1.244	0.512	0.823	0.756	0.731		0.9455	0.3665
14.9082	894.489	0.748	0.57	0.06	9839.8	2563.2	14909.2	1.7	-9.62	-20.77	0.0541	1.1023	0.364	0.5779	-1.9	1.736	4988.7	7276.6	22.785	1.321	1.263	0.515	0.823	0.765	0.751		0.9455	0.374
14.9415	896.489	0.718	0.57	0.06	9835.8	2564.2	14907.2	1.6	-9.62	-20.77	0.0553	1.1018	0.3641	0.5783	-1.6	1.668	4988.1	7271.6	22.7849	1.291	1.233	0.515	0.813	0.755	0.721		0.9305	0.359
14.9748	898.489	0.703	0.58	0.06	9838.4	2564.2	14909.9	1.6	-9.62	-20.76	0.0542	1.1021	0.3641	0.5779	-1.6	1.634	4988.9	7274.2	22.7849	1.281	1.219	0.516	0.813	0.75	0.701		0.9305	0.3515
15.0082	900.489	0.703	0.58	0.06	9837.8	2564.7	14910.2	1.6	-9.61	-20.76	0.0535	1.102	0.3642	0.5775	-1.6	1.634	4989.1	7273.1	22.7849	1.281	1.219	0.516	0.813	0.75	0.701		0.9305	0.3515
15.0415	902.489	0.703	0.58	0.06	9838.4	2565.2	14911.9	1.6	-9.61	-20.75	0.0542	1.1021	0.3643	0.5779	-1.5	1.634	4989.6	7273.2	22.7849	1.281	1.219	0.516	0.813	0.75	0.701		0.9305	0.3515
15.0748	904.488	0.703	0.58	0.06	9838.4	2565.2	14911.9	1.6	-9.61	-20.76	0.0542	1.1021	0.3643	0.5779	-1.6	1.634	4989.6	7273.2	22.7849	1.286	1.223	0.521	0.817	0.755	0.706		0.933	0.3515
15.1081	906.488	0.703	0.57	0.06	9838.4	2566.2	14913.9	1.6	-9.62	-20.76	0.0539	1.1021	0.3644	0.5777	-1.9	1.634	4990.3	7272.2	22.7848	1.277	1.218	0.515	0.808	0.75	0.707		0.9235	0.3515
15.1415	908.488	0.718	0.57	0.06	9837.8	2566.2	14913.2	1.6	-9.61	-20.77	0.0555	1.102	0.3644	0.5785	-1.9	1.668	4990.1	7271.5	22.7848	1.291	1.233	0.515	0.813	0.755	0.721		0.9305	0.359
15.1748	910.488	0.703	0.58	0.07	9836.4	2566.8	14912.9	1.6	-9.61	-20.77	0.052	1.1019	0.3645	0.5767	-1.9	1.634	4990	7269.7	22.7848	1.281	1.214	0.512	0.813	0.746	0.701		0.9305	0.3515
15.2081	912.488	0.718	0.57	0.06	9835.8	2566.2	14911.2	1.6	-9.61	-20.77	0.0549	1.1018	0.3644	0.5781	-1.5	1.668	4989.4	7269.5	22.7848	1.291	1.229	0.511	0.813	0.751	0.721		0.9305	0.359
15.2415	914.488	0.688	0.57	0.06	9837.8	2565.2	14911.2	1.6	-9.61	-20.78	0.0543	1.102	0.3643	0.5779	-1.8	1.6	4989.4	7272.6	22.7849	1.262	1.199	0.511	0.803	0.741	0.692		0.916	0.344
15.2748	916.488	0.718	0.57	0.06	9837.8	2565.2	14911.2	1.6	-9.62	-20.79	0.0542	1.102	0.3643	0.5779	-1.9	1.667	4989.4	7272.6	22.7849	1.287	1.224	0.507	0.808	0.746	0.717		0.9285	0.359
15.3081	918.487	0.718	0.56	0.06	9837.8	2565.2	14911.2	1.6	-9.62	-20.79	0.0545	1.102	0.3643	0.578	-2	1.667	4989.4	7272.6	22.7849	1.282	1.22	0.502	0.804	0.741	0.722		0.921	0.359
15.3415	920.487	0.733	0.57	0.07	9837.8	2563.2	14907.2	1.7	-9.61	-20.79	0.0562	1.102	0.364	0.5789	-2	1.701	4988	7274.6	22.785	1.302	1.231	0.498	0.813	0.743	0.732		0.936	0.3665
15.3748	922.487	0.703	0.57	0.08	9837.8	2563.2	14907.2	1.6	-9.62	-20.79	0.0539	1.102	0.364	0.5777	-2	1.633	4988	7274.6	22.785	1.272	1.197	0.494	0.803	0.728	0.702		0.921	0.3515
15.4081	924.487	0.718	0.56	0.07	9837.1	2562.2	14904.5	1.6	-9.62	-20.79	0.0551	1.102	0.3639	0.5783	-2.2	1.667	4987.1	7274.9	22.785	1.282	1.211	0.494	0.804	0.733	0.722		0.921	0.359
15.4414	926.487	0.703	0.57	0.07	9837.1	2560.6	14901.5	1.6	-9.62	-20.79	0.054	1.102	0.3636	0.5777	-2	1.633	4986.1	7276.5	22.7851	1.272	1.205	0.502	0.803	0.737	0.702		0.921	0.3515
15.4748	928.487	0.673	0.57	0.07	9837.1	2560.6	14901.5	1.5	-9.62	-20.79	0.0563	1.102	0.3636	0.5789	-2	1.565	4986.1	7276.5	22.7851	1.247	1.176	0.503	0.798	0.727	0.677		0.9085	0.3365
15.5081	930.486	0.703	0.56	0.07	9838.4	2559.6	14900.8	1.6	-9.62	-20.79	0.0534	1.1021	0.3635	0.5775	-1.9	1.633	4985.9	7278.8	22.7851	1.267	1.201	0.498	0.799	0.732	0.707		0.9135	0.3515
15.5414	932.486	0.718	0.57	0.08	9837.1	2559.6	14899.5	1.6	-9.61	-20.79	0.0545	1.102	0.3635	0.578	-2	1.667	4985.4	7277.5	22.7851	1.287	1.212	0.494	0.808	0.733	0.717		0.9285	0.359
15.5748	934.486	0.688	0.57	0.07	9837.8	2560.6	14902.1	1.6	-9.62	-20.79	0.0534	1.102	0.3636	0.5775	-2	1.6	4986.3	7277.2	22.7851	1.262	1.191	0.503	0.803	0.732	0.692		0.916	0.344
15.6081	936.486	0.688	0.57	0.07	9837.8	2560.6	14902.1	1.6	-9.62	-20.78	0.0544	1.102	0.3636	0.578	-2	1.599	4986.3	7277.2	22.7851	1.257	1.19	0.502	0.798	0.732	0.687		0.9135	0.344
15.6414	938.486	0.703	0.56	0.07	9837.8	2560.1	14901.1	1.6	-9.62	-20.79	0.0536	1.102	0.3636	0.5776	-1.9	1.633	4986	7277.7	22.7851	1.267	1.201	0.498	0.799	0.732	0.707		0.9135	0.3515
15.6748	940.486	0.718	0.57	0.08	9837.8	2560.6	14902.1	1.6	-9.62	-20.78	0.0534	1.102	0.3636	0.5775	-1.7	1.668	4986.3	7277.2	22.7851	1.291	1.216	0.499	0.813	0.738	0.721		0.9305	0.359
15.7081	942.486	0.688	0.57	0.06	9837.1	2560.6	14901.5	1.6	-9.63	-20.77	0.0528	1.102	0.3636	0.5771	-2	1.599	4986.1	7276.5	22.7851	1.257	1.194	0.507	0.798	0.736	0.687		0.9135	0.344
15.7414	944.485	0.703	0.56	0.07	9837.8	2560.6	14902.1	1.6	-9.63	-20.78	0.0558	1.102	0.3636	0.5786	-1.7	1.633	4986.3	7277.2	22.7851	1.267	1.201	0.498	0.799	0.732	0.707		0.9135	0.3515
15.7748	946.485	0.703	0.57	0.07	9837.1	2561.1	14902.5	1.6	-9.63	-20.77	0.0553	1.102	0.3637	0.5784	-1.7	1.633	4986.5	7276	22.7851	1.272	1.201	0.498	0.803	0.733	0.702		0.921	0.3515
15.8081	948.485	0.673	0.57	0.07	9837.8	2561.1	14903.1	1.5	-9.64	-20.77	0.0535	1.102	0.3637	0.5775	-1.7	1.565	4986.7	7276.6	22.7851	1.242	1.171	0.498	0.793	0.723	0.672		0.906	0.3365
15.8414	950.485	0.718	0.56	0.07	9837.8	2560.6	14902.1	1.6	-9.63	-20.77	0.0532	1.102	0.3636	0.5773	-1.9	1.667	4986.3	7277.2	22.7851	1.282	1.211	0.494	0.804	0.733	0.722		0.921	0.359
15.8748	952.485	0.703	0.57	0.07	9837.1	2561.1	14902.5	1.6	-9.64	-20.76	0.0539	1.102	0.3637	0.5777	-1.7	1.633	4986.5	7276	22.7851	1.272	1.201	0.498	0.803	0.733	0.702		0.921	0.3515
15.9081	954.485	0.703	0.57	0.07	9837.1	2561.6	14903.5	1.6	-9.63	-20.75	0.0536	1.102	0.3638	0.5775	-1.7	1.633	4986.8	7275.5	22.785	1.272	1.205	0.502	0.803	0.737	0.702		0.921	0.3515
15.9414	956.484	0.703	0.57	0.07	9837.8	2561.6	14904.1	1.6	-9.63	-20.75	0.0533	1.102	0.3638	0.5774	-1.4	1.633	4987	7276.1	22.785	1.272	1.205	0.502	0.803	0.737	0.702		0.921	0.3515
15.9747	958.484	0.748	0.57	0.08	9837.1	2562.2	14904.5	1.7	-9.63	-20.75	0.054	1.102	0.3639	0.5777	-1.7	1.736	4987.1	7274.9	22.785	1.321	1.246	0.499	0.823	0.748	0.751		0.9455	0.374
16.0081	960.484	0.703	0.57	0.08	9837.1	2562.2	14904.5	1.6	-9.63	-20.73	0.0549	1.102	0.3639	0.5782	-1.6	1.634	4987.1	7274.9	22.785	1.277	1.201	0.499	0.808	0.733	0.707		0.9235	0.3515
16.0414	962.484	0.718	0.57	0.08	9837.8	2562.2	14905.2	1.6	-9.63	-20.73	0.0534	1.102	0.3639	0.5775	-1.8	1.667	4987.4	7275.6	22.785	1.287	1.212	0.494	0.808	0.733	0.717		0.9285	0.359
16.0747	964.484	0.703	0.57	0.08	9837.1	2562.2	14904.5	1.6	-9.63	-20.72	0.0548	1.102	0.3639	0.5781	-1.8	1.634	4987.1	7274.9	22.785	1.277	1.197	0.495	0.808	0.729	0.707		0.9235	0.3515
16.1081	966.484	0.688	0.57	0.08	9837.1	2562.7	14905.5	1.6	-9.64	-20.72	0.0558	1.102	0.3639	0.5786	-2	1.599	4987.5	7274.4	22.785	1.257	1.178	0.49	0.798	0.719	0.687		0.9135	0.344
16.1414	968.484	0.703	0.57	0.08	9837.1	2562.7	14905.5	1.6	-9.63	-20.71	0.0545	1.102	0.3639	0.578	-1.6	1.634	4987.5	7274.4	22.785	1.277	1.193	0.49	0.808	0.725	0.707		0.9235	0.3515
16.1747	970.483	0.718	0.58	0.09	9839.8	2562.7	14908.2	1.6	-9.63	-20.71	0.0534	1.1023	0.3639	0.5776	-1.8	1.668	4988.4	7277.1	22.785	1.296	1.209	0.491	0.818	0.73	0.716		0.938	0.359
16.2081	972.483	0.673	0.57	0.08	9837.8	2562.7	14906.2	1.5	-9.63	-20.7	0.0544	1.102	0.3639	0.578	-1.8	1.565	4987.7	7275.1	22.785	1.247	1.167	0.495	0.798	0.719	0.677		0.9085	0.3365
16.2414	974.483	0.673	0.57	0.09	9838.4	2562.7	14906.9	1.5	-9.62	-20.69	0.0547	1.1021	0.3639	0.5781	-1.9	1.565	4987.9	7275.8	22.785	1.247	1.159	0.486	0.798	0.711	0.677		0.9085	0.3365
16.2747	976.483	0.718	0.58	0.1	9837.1	2563.2	14906.5	1.6	-9.63	-20.69	0.054	1.102	0.364	0.5777	-1.6	1.668	4987.8	7273.9	22.785	1.301	1.205	0.487	0.822	0.726	0.721		0.9405	0.359
16.308	978.483	0.688	0.58	0.09	9837.1	2562.7	14905.5	1.6	-9.62	-20.68	0.0534	1.102	0.3639	0.5775	-1.8	1.6	4987.5	7274.4	22.785	1.266	1.174	0.487	0.808	0.716	0.686		0.923	0.344
16.3414	980.483	0.733	0.58	0.1	9839.1	2562.7	14907.5	1.7	-9.62	-20.67	0.0535	1.1022	0.3639	0.5776	-1.8	1.702	4988.2	7276.5	22.785	1.311	1.215	0.483	0.823	0.727	0.731		0.9455	0.3665
16.3747	982.483	0.718	0.58	0.1	9838.4	2563.7	14908.9	1.6	-9.62	-20.66	0.055	1.1021	0.3641	0.5783	-1.3	1.668	4988.6	7274.8	22.7849	1.301	1.205	0.487	0.822	0.726	0.721		0.9405	0.359
16.408	984.482	0.718	0.58	0.09	9839.1	2564.7	14911.6	1.6	-9.62	-20.66	0.0542	1.1022	0.3642	0.5779	-1.6	1.668	4989.5	7274.4	22.7849	1.296	1.204	0.487	0.818	0.726	0.716		0.938	0.359
16.4414	986.482	0.733	0.58	0.09	9837.1	2566.2	14912.6	1.7	-9.62	-20.65	0.055	1.102	0.3644	0.5782	-1.8	1.702	4989.9	7270.9	22.7848	1.311	1.219	0.487	0.823	0.731	0.731		0.9455	0.3665
16.4747	988.482	0.688	0.58	0.1	9837.8	2566.8	14914.2	1.6	-9.63	-20.65	0.0547	1.102	0.3645	0.5781	-1.8	1.6	4990.4	7271	22.7848	1.271	1.175	0.487	0.812	0.716	0.691		0.9255	0.344
16.508	990.482	0.718	0.58	0.09	9837.1	2566.8	14913.6	1.6	-9.62	-20.65	0.055	1.102	0.3645	0.5782	-1.6	1.668	4990.2	7270.3	22.7848	1.296	1.209	0.491	0.818	0.73	0.716		0.938	0.359
16.5414	992.482	0.673	0.58	0.09	9837.1	2567.3	14914.6	1.5	-9.62	-20.65	0.0522	1.102	0.3646	0.5768	-1.6	1.566	4990.5	7269.8	22.7848	1.256	1.168	0.496	0.807	0.72	0.676		0.918	0.3365
16.5747	994.482	0.718	0.58	0.09	9837.8	2566.8	14914.2	1.6	-9.62	-20.65	0.0549	1.102	0.3645	0.5782	-1.6	1.668	4990.4	7271	22.7848	1.301	1.213	0.496	0.822	0.735	0.721		0.9405	0.359
16.608	996.481	0.688	0.58	0.08	9838.4	2567.3	14915.9	1.6	-9.63	-20.65	0.0544	1.1021	0.3646	0.578	-1.6	1.6	4991	7271.2	22.7848	1.271	1.187	0.5	0.812	0.729	0.691		0.9255	0.344
16.6413	998.481	0.688	0.58	0.08	9837.8	2566.8	14914.2	1.6	-9.62	-20.66	0.0548	1.102	0.3645	0.5782	-1.3	1.6	4990.4	7271	22.7848	1.271	1.187	0.5	0.812	0.729	0.691		0.9255	0.344
16.6747	1000.48	0.718	0.58	0.09	9838.4	2567.8	14917	1.6	-9.62	-20.66	0.0529	1.1021	0.3646	0.5772	-1.8	1.668	4991.3	7270.7	22.7847	1.301	1.213	0.496	0.822	0.735	0.721		0.9405	0.359
16.708	1002.48	0.688	0.58	0.08	9836.4	2567.8	14915	1.6	-9.62	-20.66	0.0547	1.1019	0.3646	0.578	-1.8	1.6	4990.7	7268.7	22.7847	1.266	1.183	0.495	0.808	0.724	0.686		0.923	0.344
16.7413	1004.48	0.718	0.58	0.09	9837.1	2568.3	14916.6	1.6	-9.62	-20.67	0.0542	1.102	0.3647	0.5779	-1.5	1.668	4991.2	7268.8	22.7847	1.296	1.209	0.491	0.818	0.73	0.716		0.938	0.359
16.7747	1006.48	0.703	0.58	0.09	9839.1	2567.8	14917.6	1.6	-9.63	-20.67	0.055	1.1022	0.3646	0.5784	-1.8	1.634	4991.6	7271.3	22.7847	1.286	1.198	0.496	0.817	0.73	0.706		0.933	0.3515
16.808	1008.48	0.703	0.57	0.08	9837.8	2567.3	14915.2	1.6	-9.62	-20.67	0.0539	1.102	0.3646	0.5777	-1.5	1.634	4990.8	7270.5	22.7848	1.277	1.193	0.49	0.808	0.725	0.707		0.9235	0.3515
16.8413	1010.48	0.733	0.57	0.08	9838.4	2566.8	14914.9	1.7	-9.63	-20.69	0.0553	1.1021	0.3645	0.5785	-1.5	1.702	4990.7	7271.7	22.7848	1.306	1.231	0.499	0.818	0.743	0.736		0.938	0.3665
16.8747	1012.48	0.703	0.57	0.08	9837.1	2566.8	14913.6	1.6	-9.63	-20.7	0.0544	1.102	0.3645	0.5779	-1.6	1.633	4990.2	7270.3	22.7848	1.272	1.197	0.494	0.803	0.728	0.702		0.921	0.3515
16.908	1014.48	0.688	0.57	0.08	9839.1	2565.7	14913.6	1.6	-9.63	-20.71	0.0539	1.1022	0.3644	0.5778	-1.4	1.599	4990.2	7273.4	22.7848	1.257	1.182	0.494	0.798	0.723	0.687		0.9135	0.344
16.9413	1016.48	0.733	0.57	0.08	9837.8	2565.2	14911.2	1.7	-9.63	-20.71	0.0517	1.102	0.3643	0.5766	-1.6	1.701	4989.4	7272.6	22.7849	1.302	1.223	0.49	0.813	0.734	0.732		0.936	0.3665
16.9747	1018.48	0.703	0.57	0.08	9836.4	2564.2	14907.9	1.6	-9.63	-20.72	0.0542	1.1019	0.3641	0.5778	-1.5	1.633	4988.3	7272.2	22.7849	1.272	1.193	0.49	0.803	0.724	0.702		0.921	0.3515
17.008	1020.48	0.688	0.56	0.08	9838.4	2561.6	14904.8	1.6	-9.64	-20.72	0.0542	1.1021	0.3638	0.5779	-1.5	1.599	4987.2	7276.8	22.785	1.248	1.168	0.481	0.789	0.71	0.688		0.904	0.344
17.0413	1022.48	0.733	0.57	0.08	9835.8	2560.6	14900.1	1.7	-9.63	-20.72	0.0547	1.1018	0.3636	0.578	-1.5	1.701	4985.7	7275.1	22.7851	1.302	1.218	0.486	0.813	0.73	0.732		0.936	0.3665
17.0747	1024.48	0.703	0.57	0.09	9837.1	2559.1	14898.5	1.6	-9.64	-20.73	0.0547	1.102	0.3634	0.5781	-1.8	1.633	4985.1	7278	22.7851	1.272	1.184	0.482	0.803	0.716	0.702		0.921	0.3515
17.108	1026.48	0.703	0.56	0.08	9837.1	2558.1	14896.4	1.6	-9.63	-20.73	0.0553	1.102	0.3633	0.5784	-1.9	1.633	4984.4	7279	22.7852	1.267	1.184	0.481	0.799	0.715	0.707		0.9135	0.3515
17.1413	1028.48	0.703	0.57	0.09	9838.4	2557.1	14895.8	1.6	-9.63	-20.73	0.0545	1.1021	0.3631	0.578	-1.8	1.633	4984.2	7281.4	22.7852	1.272	1.184	0.482	0.803	0.716	0.702		0.921	0.3515
17.1747	1030.48	0.703	0.57	0.1	9837.8	2556	14893.1	1.6	-9.63	-20.71	0.0557	1.102	0.363	0.5786	-1.6	1.633	4983.3	7281.7	22.7853	1.272	1.176	0.473	0.803	0.708	0.702		0.921	0.3515
17.208	1032.48	0.718	0.57	0.1	9837.8	2555	14891	1.6	-9.62	-20.7	0.0521	1.102	0.3628	0.5768	-1.6	1.668	4982.6	7282.8	22.7853	1.291	1.196	0.478	0.813	0.717	0.721		0.9305	0.359
17.2413	1034.48	0.718	0.57	0.1	9839.1	2555	14892.4	1.6	-9.62	-20.69	0.0539	1.1022	0.3628	0.5778	-1.8	1.667	4983	7284.1	22.7853	1.287	1.187	0.469	0.808	0.708	0.717		0.9285	0.359
17.2747	1036.48	0.703	0.58	0.11	9837.8	2555	14891	1.6	-9.62	-20.68	0.0533	1.102	0.3628	0.5774	-1.8	1.634	4982.6	7282.8	22.7853	1.281	1.169	0.466	0.813	0.7	0.701		0.9305	0.3515
17.308	1038.48	0.703	0.57	0.11	9837.8	2554.5	14890	1.6	-9.62	-20.67	0.0545	1.102	0.3628	0.578	-1.5	1.634	4982.3	7283.3	22.7854	1.277	1.164	0.461	0.808	0.695	0.707		0.9235	0.3515
17.3413	1040.48	0.733	0.58	0.11	9838.4	2554.5	14890.7	1.7	-9.62	-20.66	0.0544	1.1021	0.3628	0.578	-1.6	1.702	4982.5	7283.9	22.7854	1.311	1.203	0.47	0.823	0.714	0.731		0.9455	0.3665
17.3747	1042.48	0.703	0.59	0.11	9837.8	2555.5	14892	1.6	-9.62	-20.64	0.055	1.102	0.3629	0.5783	-1.5	1.634	4982.9	7282.3	22.7853	1.29	1.178	0.475	0.822	0.709	0.7		0.94	0.3515
17.408	1044.48	0.718	0.59	0.11	9838.4	2555.5	14892.7	1.6	-9.62	-20.62	0.0548	1.1021	0.3629	0.5782	-1.6	1.668	4983.2	7282.9	22.7853	1.305	1.197	0.479	0.827	0.719	0.715		0.9475	0.359
17.4413	1046.48	0.718	0.59	0.11	9837.8	2557.6	14896.1	1.6	-9.61	-20.59	0.0532	1.102	0.3632	0.5774	-1.2	1.668	4984.3	7280.2	22.7852	1.305	1.193	0.475	0.827	0.714	0.715		0.9475	0.359
17.4747	1048.48	0.673	0.6	0.11	9835.8	2562.7	14904.2	1.5	-9.62	-20.57	0.055	1.1018	0.3639	0.5781	-1.1	1.567	4987	7273.1	22.785	1.27	1.157	0.484	0.821	0.709	0.67		0.935	0.3365
17.508	1050.48	0.688	0.6	0.11	9837.1	2567.3	14914.6	1.6	-9.62	-20.55	0.0545	1.102	0.3646	0.578	-1.2	1.601	4990.5	7269.8	22.7848	1.285	1.176	0.489	0.826	0.718	0.685		0.9425	0.344
17.5413	1052.48	0.703	0.6	0.1	9839.1	2570.8	14923.7	1.6	-9.62	-20.54	0.055	1.1022	0.3651	0.5784	-1.2	1.635	4993.6	7268.3	22.7846	1.3	1.195	0.493	0.831	0.727	0.7		0.95	0.3515
17.5747	1054.48	0.688	0.6	0.1	9836.4	2573.9	14927.1	1.6	-9.63	-20.54	0.056	1.1019	0.3655	0.5787	-1.4	1.601	4994.7	7262.5	22.7845	1.285	1.185	0.497	0.826	0.726	0.685		0.9425	0.344
17.608	1056.48	0.688	0.59	0.1	9838.4	2574.9	14931.1	1.6	-9.63	-20.54	0.0516	1.1021	0.3657	0.5766	-1.2	1.601	4996.1	7263.5	22.7844	1.28	1.176	0.488	0.822	0.717	0.69		0.935	0.344
17.6413	1058.48	0.688	0.59	0.1	9838.4	2575.4	14932.1	1.6	-9.62	-20.54	0.0536	1.1021	0.3657	0.5776	-0.9	1.601	4996.4	7263	22.7844	1.28	1.184	0.496	0.822	0.726	0.69		0.935	0.344
17.6747	1060.48	0.718	0.59	0.1	9839.1	2576.5	14934.8	1.6	-9.62	-20.55	0.0531	1.1022	0.3659	0.5774	-1.3	1.669	4997.3	7262.7	22.7844	1.31	1.214	0.496	0.832	0.736	0.72		0.95	0.359
17.708	1062.48	0.703	0.59	0.1	9837.8	2576.5	14933.4	1.6	-9.62	-20.56	0.0549	1.102	0.3659	0.5782	-1.4	1.634	4996.9	7261.3	22.7844	1.29	1.195	0.492	0.822	0.726	0.7		0.94	0.3515
17.7413	1064.48	0.703	0.59	0.09	9837.8	2575.9	14932.4	1.6	-9.62	-20.58	0.0534	1.102	0.3658	0.5775	-1.3	1.634	4996.6	7261.8	22.7844	1.29	1.199	0.496	0.822	0.73	0.7		0.94	0.3515
17.7747	1066.48	0.688	0.59	0.09	9835.8	2575.4	14929.4	1.6	-9.62	-20.59	0.056	1.1018	0.3657	0.5787	-1.3	1.6	4995.5	7260.3	22.7844	1.275	1.184	0.496	0.817	0.725	0.685		0.9325	0.344
17.808	1068.48	0.703	0.58	0.09	9837.8	2573.4	14927.4	1.6	-9.62	-20.61	0.0532	1.102	0.3654	0.5773	-1.5	1.634	4994.9	7264.4	22.7845	1.286	1.194	0.491	0.817	0.726	0.706		0.933	0.3515
17.8413	1070.48	0.688	0.58	0.09	9836.4	2570.3	14920	1.6	-9.62	-20.63	0.0551	1.1019	0.365	0.5782	-1.3	1.6	4992.4	7266.1	22.7846	1.271	1.179	0.491	0.812	0.721	0.691		0.9255	0.344
17.8747	1072.48	0.718	0.58	0.09	9837.1	2566.8	14913.6	1.6	-9.62	-20.65	0.0532	1.102	0.3645	0.5773	-1.6	1.668	4990.2	7270.3	22.7848	1.296	1.204	0.487	0.818	0.726	0.716		0.938	0.359
17.908	1074.48	0.718	0.57	0.1	9837.1	2563.2	14906.5	1.6	-9.62	-20.67	0.0538	1.102	0.364	0.5776	-1.5	1.668	4987.8	7273.9	22.785	1.291	1.196	0.478	0.813	0.717	0.721		0.9305	0.359
17.9413	1076.48	0.703	0.56	0.09	9837.1	2560.1	14900.5	1.6	-9.62	-20.68	0.0528	1.102	0.3636	0.5771	-1.6	1.633	4985.8	7277	22.7851	1.267	1.18	0.477	0.799	0.711	0.707		0.9135	0.3515
17.9747	1078.48	0.718	0.57	0.09	9839.1	2558.1	14898.5	1.6	-9.62	-20.7	0.0548	1.1022	0.3633	0.5783	-1.7	1.667	4985.1	7281	22.7852	1.287	1.199	0.482	0.808	0.721	0.717		0.9285	0.359
18.008	1080.48	0.688	0.56	0.08	9838.4	2556.5	14894.8	1.6	-9.63	-20.71	0.0529	1.1021	0.3631	0.5773	-1.6	1.599	4983.8	7281.9	22.7853	1.252	1.169	0.481	0.794	0.71	0.692		0.906	0.344
18.0412	1082.47	0.718	0.56	0.08	9837.8	2555.5	14892	1.6	-9.63	-20.71	0.056	1.102	0.3629	0.5788	-1.8	1.667	4982.9	7282.3	22.7853	1.282	1.199	0.481	0.804	0.72	0.722		0.921	0.359
18.0745	1084.47	0.703	0.56	0.09	9837.1	2555	14890.4	1.6	-9.63	-20.71	0.0543	1.102	0.3628	0.5779	-1.8	1.633	4982.4	7282.1	22.7853	1.267	1.18	0.477	0.799	0.711	0.707		0.9135	0.3515
18.1078	1086.47	0.703	0.56	0.08	9837.8	2554	14889	1.6	-9.62	-20.71	0.054	1.102	0.3627	0.5778	-1.6	1.633	4981.9	7283.8	22.7854	1.267	1.184	0.481	0.799	0.715	0.707		0.9135	0.3515
18.1412	1088.47	0.688	0.57	0.09	9837.8	2554.5	14890	1.6	-9.62	-20.7	0.0539	1.102	0.3628	0.5777	-1.3	1.6	4982.3	7283.3	22.7854	1.262	1.174	0.486	0.803	0.716	0.692		0.916	0.344
18.1745	1090.47	0.703	0.57	0.09	9837.1	2555.5	14891.4	1.6	-9.63	-20.69	0.0553	1.102	0.3629	0.5784	-1.6	1.634	4982.7	7281.6	22.7853	1.277	1.189	0.486	0.808	0.72	0.707		0.9235	0.3515
18.2078	1092.47	0.718	0.57	0.09	9837.8	2555.5	14892	1.6	-9.62	-20.68	0.0536	1.102	0.3629	0.5776	-1.6	1.668	4982.9	7282.3	22.7853	1.291	1.2	0.482	0.813	0.721	0.721		0.9305	0.359
18.2412	1094.47	0.718	0.57	0.09	9837.8	2556	14893.1	1.6	-9.63	-20.67	0.0534	1.102	0.363	0.5775	-1.6	1.667	4983.3	7281.7	22.7853	1.287	1.195	0.477	0.808	0.717	0.717		0.9285	0.359
18.2745	1096.47	0.703	0.57	0.09	9838.4	2557.1	14895.8	1.6	-9.63	-20.67	0.0532	1.1021	0.3631	0.5774	-1.9	1.634	4984.2	7281.4	22.7852	1.277	1.185	0.482	0.808	0.716	0.707		0.9235	0.3515
18.3078	1098.47	0.703	0.57	0.09	9838.4	2557.1	14895.8	1.6	-9.63	-20.66	0.054	1.1021	0.3631	0.5778	-1.9	1.633	4984.2	7281.4	22.7852	1.272	1.184	0.482	0.803	0.716	0.702		0.921	0.3515
18.3412	1100.47	0.703	0.57	0.09	9837.8	2560.1	14901.1	1.6	-9.62	-20.65	0.0532	1.102	0.3636	0.5774	-1.3	1.634	4986	7277.7	22.7851	1.277	1.185	0.482	0.808	0.716	0.707		0.9235	0.3515
18.3745	1102.47	0.718	0.58	0.09	9838.4	2562.2	14905.9	1.6	-9.62	-20.64	0.055	1.1021	0.3639	0.5783	-1.5	1.668	4987.6	7276.3	22.785	1.301	1.209	0.491	0.822	0.731	0.721		0.9405	0.359
18.4078	1104.47	0.703	0.58	0.09	9837.8	2563.2	14907.2	1.6	-9.62	-20.63	0.0554	1.102	0.364	0.5785	-1.6	1.634	4988	7274.6	22.785	1.286	1.194	0.491	0.817	0.726	0.706		0.933	0.3515
18.4412	1106.47	0.733	0.58	0.09	9839.1	2564.2	14910.6	1.7	-9.62	-20.62	0.0561	1.1022	0.3641	0.5789	-1.5	1.702	4989.2	7274.9	22.7849	1.311	1.219	0.487	0.823	0.731	0.731		0.9455	0.3665
18.4745	1108.47	0.718	0.58	0.1	9838.4	2565.7	14912.9	1.6	-9.62	-20.62	0.0543	1.1021	0.3644	0.578	-1.5	1.668	4990	7272.7	22.7848	1.301	1.205	0.487	0.822	0.726	0.721		0.9405	0.359
18.5078	1110.47	0.673	0.58	0.09	9837.1	2566.8	14913.6	1.5	-9.62	-20.62	0.0545	1.102	0.3645	0.578	-1.3	1.566	4990.2	7270.3	22.7848	1.251	1.164	0.491	0.803	0.715	0.671		0.9155	0.3365
18.5412	1112.47	0.703	0.58	0.09	9837.8	2566.2	14913.2	1.6	-9.62	-20.61	0.0544	1.102	0.3644	0.578	-1.4	1.634	4990.1	7271.5	22.7848	1.281	1.194	0.491	0.813	0.725	0.701		0.9305	0.3515
18.5745	1114.47	0.718	0.58	0.09	9837.8	2568.3	14917.3	1.6	-9.62	-20.61	0.054	1.102	0.3647	0.5778	-1.4	1.668	4991.4	7269.5	22.7847	1.296	1.209	0.491	0.818	0.73	0.716		0.938	0.359
18.6078	1116.47	0.688	0.58	0.09	9838.4	2568.3	14918	1.6	-9.62	-20.61	0.0539	1.1021	0.3647	0.5777	-1.6	1.6	4991.7	7270.2	22.7847	1.266	1.174	0.487	0.808	0.716	0.686		0.923	0.344
18.6412	1118.47	0.688	0.58	0.09	9837.8	2567.8	14916.3	1.6	-9.62	-20.62	0.0537	1.102	0.3646	0.5776	-1.5	1.6	4991.1	7270	22.7847	1.266	1.179	0.491	0.808	0.72	0.686		0.923	0.344
18.6745	1120.47	0.703	0.57	0.1	9838.4	2567.8	14917	1.6	-9.62	-20.62	0.0545	1.1021	0.3646	0.5781	-1.3	1.634	4991.3	7270.7	22.7847	1.277	1.181	0.478	0.808	0.712	0.707		0.9235	0.3515
18.7078	1122.47	0.673	0.58	0.1	9837.1	2567.8	14915.6	1.5	-9.62	-20.63	0.0539	1.102	0.3646	0.5777	-1.6	1.566	4990.9	7269.3	22.7847	1.251	1.151	0.478	0.803	0.703	0.671		0.9155	0.3365
18.7412	1124.47	0.703	0.57	0.1	9836.4	2566.8	14912.9	1.6	-9.63	-20.63	0.0551	1.1019	0.3645	0.5782	-2.1	1.634	4990	7269.7	22.7848	1.277	1.176	0.474	0.808	0.708	0.707		0.9235	0.3515
18.7745	1126.47	0.718	0.57	0.1	9837.8	2564.2	14909.2	1.6	-9.64	-20.64	0.0558	1.102	0.3641	0.5786	-1.5	1.667	4988.7	7273.6	22.7849	1.287	1.187	0.469	0.808	0.708	0.717		0.9285	0.359
18.8078	1128.47	0.703	0.56	0.1	9837.8	2562.2	14905.2	1.6	-9.64	-20.64	0.0552	1.102	0.3639	0.5784	-1.6	1.633	4987.4	7275.6	22.785	1.267	1.163	0.46	0.799	0.695	0.707		0.9135	0.3515
18.8412	1130.47	0.703	0.57	0.1	9838.4	2560.1	14901.8	1.6	-9.64	-20.64	0.0535	1.1021	0.3636	0.5776	-1.4	1.633	4986.2	7278.3	22.7851	1.272	1.168	0.465	0.803	0.699	0.702		0.921	0.3515
18.8745	1132.47	0.733	0.57	0.1	9837.1	2559.1	14898.5	1.7	-9.63	-20.64	0.0545	1.102	0.3634	0.578	-1.7	1.702	4985.1	7278	22.7851	1.306	1.202	0.47	0.818	0.714	0.736		0.938	0.3665
18.9078	1134.47	0.688	0.57	0.1	9837.8	2558.6	14898.1	1.6	-9.64	-20.64	0.0534	1.102	0.3633	0.5775	-1.6	1.599	4985	7279.2	22.7852	1.257	1.157	0.469	0.798	0.698	0.687		0.9135	0.344
18.9412	1136.47	0.733	0.57	0.1	9837.1	2558.6	14897.4	1.7	-9.64	-20.63	0.055	1.102	0.3633	0.5782	-1.6	1.701	4984.8	7278.5	22.7852	1.302	1.202	0.469	0.813	0.713	0.732		0.936	0.3665
18.9745	1138.47	0.703	0.58	0.1	9838.4	2558.6	14898.8	1.6	-9.63	-20.63	0.0529	1.1021	0.3633	0.5772	-1.4	1.634	4985.2	7279.9	22.7852	1.281	1.177	0.474	0.813	0.708	0.701		0.9305	0.3515
19.0078	1140.47	0.703	0.58	0.1	9838.4	2558.6	14898.8	1.6	-9.64	-20.62	0.0542	1.1021	0.3633	0.5779	-1.6	1.634	4985.2	7279.9	22.7852	1.281	1.185	0.483	0.813	0.717	0.701		0.9305	0.3515
19.0412	1142.47	0.718	0.57	0.1	9837.8	2558.6	14898.1	1.6	-9.63	-20.61	0.0532	1.102	0.3633	0.5773	-1.6	1.668	4985	7279.2	22.7852	1.291	1.191	0.474	0.813	0.713	0.721		0.9305	0.359
19.0745	1144.47	0.718	0.57	0.1	9837.8	2560.1	14901.1	1.6	-9.63	-20.61	0.055	1.102	0.3636	0.5783	-1.4	1.668	4986	7277.7	22.7851	1.291	1.191	0.474	0.813	0.713	0.721		0.9305	0.359
19.1078	1146.47	0.688	0.58	0.1	9837.8	2560.1	14901.1	1.6	-9.64	-20.6	0.0552	1.102	0.3636	0.5784	-1.3	1.6	4986	7277.7	22.7851	1.266	1.166	0.478	0.808	0.708	0.686		0.923	0.344
19.1412	1148.47	0.703	0.57	0.1	9837.8	2561.6	14904.1	1.6	-9.63	-20.59	0.0547	1.102	0.3638	0.5781	-1.6	1.634	4987	7276.1	22.785	1.277	1.181	0.478	0.808	0.712	0.707		0.9235	0.3515
19.1745	1150.47	0.703	0.58	0.1	9837.1	2564.2	14908.5	1.6	-9.64	-20.59	0.054	1.102	0.3641	0.5777	-1.3	1.634	4988.5	7272.9	22.7849	1.281	1.185	0.483	0.813	0.717	0.701		0.9305	0.3515
19.2078	1152.47	0.673	0.58	0.1	9837.1	2564.7	14909.5	1.5	-9.64	-20.59	0.0539	1.102	0.3642	0.5777	-1.3	1.566	4988.8	7272.4	22.7849	1.251	1.155	0.483	0.803	0.707	0.671		0.9155	0.3365
19.2412	1154.47	0.718	0.57	0.1	9838.4	2565.2	14911.9	1.6	-9.64	-20.58	0.0547	1.1021	0.3643	0.5782	-1.1	1.668	4989.6	7273.2	22.7849	1.291	1.191	0.474	0.813	0.713	0.721		0.9305	0.359
19.2745	1156.47	0.718	0.58	0.1	9837.8	2565.2	14911.2	1.6	-9.64	-20.58	0.0549	1.102	0.3643	0.5782	-1.4	1.668	4989.4	7272.6	22.7849	1.296	1.192	0.474	0.818	0.713	0.716		0.938	0.359
19.3078	1158.47	0.718	0.58	0.1	9838.4	2564.7	14910.9	1.6	-9.63	-20.57	0.0545	1.1021	0.3642	0.5781	-1.4	1.668	4989.3	7273.7	22.7849	1.301	1.196	0.479	0.822	0.718	0.721		0.9405	0.359
19.3412	1160.47	0.688	0.58	0.1	9837.1	2564.7	14909.5	1.6	-9.63	-20.56	0.054	1.102	0.3642	0.5777	-1.5	1.6	4988.8	7272.4	22.7849	1.271	1.167	0.479	0.812	0.708	0.691		0.9255	0.344
19.3745	1162.47	0.703	0.58	0.11	9838.4	2564.2	14909.9	1.6	-9.63	-20.57	0.0542	1.1021	0.3641	0.5779	-1.4	1.634	4988.9	7274.2	22.7849	1.281	1.173	0.47	0.813	0.704	0.701		0.9305	0.3515
19.4078	1164.47	0.688	0.58	0.11	9837.8	2564.2	14909.2	1.6	-9.64	-20.57	0.0559	1.102	0.3641	0.5787	-1.4	1.6	4988.7	7273.6	22.7849	1.266	1.158	0.47	0.808	0.699	0.686		0.923	0.344
19.4412	1166.47	0.703	0.58	0.1	9837.8	2563.7	14908.2	1.6	-9.65	-20.58	0.0539	1.102	0.3641	0.5777	-1.4	1.634	4988.4	7274.1	22.7849	1.281	1.177	0.474	0.813	0.708	0.701		0.9305	0.3515
[truncated: 484 more rows]

## Sheet: 2-8 gr
	Phase1				Phase 3 and 4

## Sheet: 3-6
Software:		GCTS C.A.T.S. Advanced	Version:	1.97
[truncated: 2,533 more rows]

[truncated: 11 more sheets: 3-6 gr, 4-5, 4-5 gr, 1-5, 1-5 gr, 3-8, 3-8 gr, 4-8, 4-8 gr, 4-9, 4-9 gr]
